# Supplementary material for: Identification and verification of the prognostic value of the glutathione S-transferase Mu genes in gastric cancer
Source: PubMed Central journal article supplement — Oncol Lett. 2020 Aug 7;20(4):100. doi: 10.3892/ol.2020.11961 (PMC7439103; doi:10.3892/ol.2020.11961), 2020-08-07
Supplement: Supplementary_Data.pdf [file Supplementary_Data.pdf]

Table SI. Gene Set Enrichment Analysis results of the c2 reference gene set for high expression of glutathione S-transferase Mu 5 in gastric cancer tissues.

| Name                                                      | Size | ES     | NES    | NOM<br>P-value | FDR<br>q-value |
|-----------------------------------------------------------|------|--------|--------|----------------|----------------|
| KEGG_CELL_CYCLE                                           | 124  | -0.673 | -2.372 | <0.001         | 0.000          |
| KEGG_RNA_DEGRADATION                                      | 56   | -0.665 | -2.162 | <0.001         | 0.002          |
| KEGG_SPLICEOSOME                                          | 123  | -0.687 | -2.132 | <0.001         | 0.003          |
| KEGG_BASE_EXCISION_REPAIR                                 | 33   | -0.739 | -2.109 | <0.001         | 0.002          |
| KEGG_NUCLEOTIDE_EXCISION_REPAIR                           | 44   | -0.688 | -2.103 | <0.001         | 0.002          |
| KEGG_PYRIMIDINE_METABOLISM                                | 96   | -0.579 | -2.101 | <0.001         | 0.002          |
| KEGG_DNA_REPLICATION                                      | 36   | -0.805 | -2.031 | <0.001         | 0.006          |
| KEGG_AMINOACYL_TRNA_BIOSYNTHESIS                          | 41   | -0.723 | -2.018 | <0.001         | 0.006          |
| KEGG_HOMOLOGOUS_RECOMBINATION                             | 26   | -0.719 | -2.006 | 0.004          | 0.006          |
| KEGG_MISMATCH_REPAIR                                      | 23   | -0.765 | -1.985 | <0.001         | 0.008          |
| KEGG_ONE_CARBON_POOL_BY_FOLATE                            | 17   | -0.736 | -1.982 | <0.001         | 0.007          |
| KEGG_UBIQUITIN_MEDIATED_PROTEOLYSIS                       | 130  | -0.452 | -1.875 | 0.002          | 0.020          |
| KEGG_RNA_POLYMERASE                                       | 29   | -0.615 | -1.813 | 0.010          | 0.036          |
| KEGG_PROTEASOME                                           | 43   | -0.698 | -1.792 | 0.002          | 0.040          |
| KEGG_BASAL_TRANSCRIPTION_FACTORS                          | 35   | -0.525 | -1.763 | 0.012          | 0.049          |
| KEGG_P53_SIGNALING_PATHWAY                                | 66   | -0.437 | -1.690 | 0.018          | 0.082          |
| KEGG_ALANINE_ASPARTATE_AND GLUTAMATE_METABOLISM           | 32   | -0.505 | -1.675 | 0.016          | 0.087          |
| KEGG_SELENOAMINO_ACID_METABOLISM                          | 25   | -0.528 | -1.665 | 0.010          | 0.088          |
| KEGG_CITRATE_CYCLE_TCA_CYCLE                              | 29   | -0.640 | -1.639 | 0.042          | 0.098          |
| KEGG_LYSINE_DEGRADATION                                   | 39   | -0.473 | -1.611 | 0.034          | 0.113          |
| KEGG_THYROID_CANCER                                       | 29   | -0.466 | -1.606 | 0.024          | 0.111          |
| KEGG_OOCYTE_MEIOSIS                                       | 108  | -0.387 | -1.599 | 0.023          | 0.111          |
| KEGG_N_GLYCAN_BIOSYNTHESIS                                | 46   | -0.501 | -1.589 | 0.039          | 0.113          |
| KEGG_PROTEIN_EXPORT                                       | 22   | -0.608 | -1.537 | 0.078          | 0.149          |
| KEGG_PURINE_METABOLISM                                    | 154  | -0.343 | -1.503 | 0.033          | 0.174          |
| KEGG_STEROID_BIOSYNTHESIS                                 | 16   | -0.584 | -1.501 | 0.083          | 0.168          |
| KEGG_GLYCOSYLPHOSPHATIDYLINOSITOL_GPI_ANCHOR_BIOSYNTHESIS | 24   | -0.490 | -1.499 | 0.067          | 0.164          |
| KEGG_GLYOXYLATE_AND_DICARBOXYLATE_METABOLISM              | 16   | -0.590 | -1.479 | 0.092          | 0.177          |
| KEGG_PROGESTERONE_MEDIATED_O                              | 83   | -0.355 | -1.476 | 0.039          | 0.174          |

|                                                  |     |        |        |       |       |
|--------------------------------------------------|-----|--------|--------|-------|-------|
| OCYTE_MATURATION                                 |     |        |        |       |       |
| KEGG_CYSTEINE_AND_METHIONINE_METABOLISM          | 34  | -0.434 | -1.464 | 0.055 | 0.180 |
| KEGG_PEROXISOME                                  | 78  | -0.422 | -1.450 | 0.107 | 0.187 |
| KEGG_TERPENOID_BACKBONE_BIOSYNTHESIS             | 15  | -0.567 | -1.417 | 0.127 | 0.213 |
| KEGG_RIBOFLAVIN_METABOLISM                       | 16  | -0.479 | -1.413 | 0.090 | 0.210 |
| KEGG_HUNTINGTONS_DISEASE                         | 172 | -0.387 | -1.359 | 0.199 | 0.261 |
| KEGG_CYTOSOLIC_DNA_SENSING_PATHWAY               | 42  | -0.397 | -1.355 | 0.144 | 0.258 |
| KEGG_PENTOSE_PHOSPHATE_PATHWAY                   | 26  | -0.457 | -1.354 | 0.138 | 0.252 |
| KEGG_VALINE_LEUCINE_AND_Isoleucine_DEGRADATION   | 44  | -0.448 | -1.348 | 0.185 | 0.252 |
| KEGG_PYRUVATE_METABOLISM                         | 38  | -0.412 | -1.337 | 0.165 | 0.258 |
| KEGG_ARGININE_AND_PROLINE_METABOLISM             | 51  | -0.367 | -1.293 | 0.166 | 0.301 |
| KEGG_SPHINGOLIPID_METABOLISM                     | 36  | -0.372 | -1.289 | 0.160 | 0.299 |
| KEGG_DRUG_METABOLISM_OTHER_ENZYMES               | 51  | -0.374 | -1.284 | 0.142 | 0.297 |
| KEGG_FRUCTOSE_AND_MANNOSE_METABOLISM             | 34  | -0.406 | -1.276 | 0.203 | 0.300 |
| KEGG_PORPHYRIN_AND_CHLOROPHYLL_METABOLISM        | 40  | -0.384 | -1.220 | 0.229 | 0.363 |
| KEGG_PROPANOATE_METABOLISM                       | 32  | -0.392 | -1.181 | 0.272 | 0.407 |
| KEGG_BUTANOATE_METABOLISM                        | 33  | -0.379 | -1.177 | 0.274 | 0.403 |
| KEGG_OXIDATIVE_PHOSPHORYLATION                   | 116 | -0.416 | -1.158 | 0.370 | 0.422 |
| KEGG_ALZHEIMERS_DISEASE                          | 156 | -0.325 | -1.149 | 0.333 | 0.425 |
| KEGG_PARKINSONS_DISEASE                          | 111 | -0.404 | -1.148 | 0.369 | 0.417 |
| KEGG_AMINO_SUGAR_AND_NUCLEOTIDE_SUGAR_METABOLISM | 44  | -0.345 | -1.112 | 0.337 | 0.461 |
| KEGG_PANTOTHENATE_AND_COA_BIOSYNTHESIS           | 16  | -0.352 | -1.068 | 0.342 | 0.518 |
| KEGG_ANTIGEN_PROCESSING_AND_PRESENTATION         | 68  | -0.364 | -1.060 | 0.399 | 0.519 |
| KEGG_GLUTATHIONE_METABOLISM                      | 47  | -0.313 | -1.036 | 0.406 | 0.549 |
| KEGG_GALACTOSE_METABOLISM                        | 25  | -0.324 | -1.032 | 0.402 | 0.545 |
| KEGG_NITROGEN_METABOLISM                         | 23  | -0.336 | -1.020 | 0.427 | 0.555 |
| KEGG_BLADDER_CANCER                              | 40  | -0.278 | -1.005 | 0.423 | 0.567 |
| KEGG_GLYCOLYSIS_GLYCONEOGENESIS                  | 59  | -0.279 | -0.985 | 0.471 | 0.588 |
| KEGG_RIBOSOME                                    | 87  | -0.432 | -0.937 | 0.555 | 0.657 |
| KEGG_MATURITY_ONSET_DIABETES                     | 24  | -0.342 | -0.919 | 0.544 | 0.676 |

OF\_THE\_YOUNG

|                                                |    |        |        |       |       |
|------------------------------------------------|----|--------|--------|-------|-------|
| KEGG_SNARE_INTERACTIONS_IN_VESICULAR_TRANSPORT | 38 | -0.255 | -0.879 | 0.623 | 0.731 |
| KEGG_PROXIMAL_TUBULE_BICARBONATE_RECLAMATION   | 23 | -0.274 | -0.879 | 0.614 | 0.720 |
| KEGG_BIOSYNTHESIS_OF_UNSATURATED_FATTY_ACIDS   | 20 | -0.298 | -0.879 | 0.588 | 0.709 |
| KEGG_PATHOGENIC_ESCHERICHIA_COLI_INFECTION     | 55 | -0.233 | -0.877 | 0.628 | 0.700 |
| KEGG_AMYOTROPHIC_LATERAL_SCLEROSIS_ALS         | 52 | -0.217 | -0.873 | 0.669 | 0.695 |
| KEGG_VIBRIO_CHOLERAЕ_INFECTION                 | 52 | -0.227 | -0.871 | 0.626 | 0.687 |
| KEGG_NOD_LIKE_RECEPTOR_SIGNALING_PATHWAY       | 60 | -0.222 | -0.821 | 0.668 | 0.760 |
| KEGG_GLYCINE_SERINE_AND_THREONINE_METABOLISM   | 31 | -0.257 | -0.819 | 0.688 | 0.750 |
| KEGG_RIG_I_LIKE_RECEPTOR_SIGNALING_PATHWAY     | 56 | -0.209 | -0.782 | 0.752 | 0.797 |
| KEGG_O_GLYCAN_BIOSYNTHESIS                     | 27 | -0.234 | -0.731 | 0.778 | 0.861 |
| KEGG_GLYCEROPHOSPHOLIPID_METABOLISM            | 71 | -0.176 | -0.730 | 0.928 | 0.849 |
| KEGG_GLYCEROLIPID_METABOLISM                   | 41 | -0.194 | -0.717 | 0.879 | 0.854 |
| KEGG_PENTOSE_AND_GLUCURONATE_INTERCONVERSIONS  | 27 | -0.240 | -0.665 | 0.835 | 0.901 |
| KEGG_OTHER_GLYCAN_DEGRADATION                  | 16 | -0.216 | -0.593 | 0.918 | 0.949 |
| KEGG_FATTY_ACID_METABOLISM                     | 42 | -0.174 | -0.542 | 0.959 | 0.964 |

ES, enrichment score; NES, normalized enrichment score; NOM, nominal; FDR, false discovery rate.

Table SII. Gene Set Enrichment Analysis results of the c5 reference gene set for high expression of glutathione S-transferase Mu 5 in gastric cancer tissues.

| Name                                                                       | Size | ES    | NES   | NOM<br>P-value | FDR<br>q-value |
|----------------------------------------------------------------------------|------|-------|-------|----------------|----------------|
| GO_SARCOLEMMMA                                                             | 124  | 0.641 | 2.280 | <0.001         | 0.020          |
| GO_PROTEINACEOUS_EXTRACELLULAR_MATRIX                                      | 344  | 0.649 | 2.274 | <0.001         | 0.012          |
| GO_EXTRACELLULAR_MATRIX                                                    | 411  | 0.640 | 2.254 | <0.001         | 0.010          |
| GO_HEPARIN_BINDING                                                         | 151  | 0.610 | 2.199 | <0.001         | 0.018          |
| GO_SIALYLATION                                                             | 21   | 0.744 | 2.185 | <0.001         | 0.019          |
| GO_REGULATION_OF_CYTOSOLIC_CALCIIUM_ION_CONCENTRATION                      | 195  | 0.574 | 2.175 | <0.001         | 0.018          |
| GO_REGULATION_OF_CELLULAR_RESPONSE_TO_GROWTH_FACTOR_STIMULUS               | 223  | 0.532 | 2.172 | <0.001         | 0.016          |
| GO_GLYCOSAMINOGLYCAN_BINDING                                               | 194  | 0.593 | 2.168 | <0.001         | 0.015          |
| GO_INTEGRIN_BINDING                                                        | 101  | 0.631 | 2.157 | <0.001         | 0.016          |
| GO_POSITIVE_REGULATION_OF_OSSIFICATION                                     | 81   | 0.623 | 2.152 | <0.001         | 0.015          |
| GO_EXTRACELLULAR_MATRIX_COMPONENT                                          | 122  | 0.675 | 2.152 | <0.001         | 0.014          |
| GO_POSITIVE_REGULATION_OF_RELEASE_OF_SEQUESTERED_CALCIIUM_ION_INTO_CYTOSOL | 36   | 0.643 | 2.150 | <0.001         | 0.013          |
| GO_DIGESTIVE_TRACT_MORPHOGENESIS                                           | 47   | 0.624 | 2.145 | <0.001         | 0.013          |
| GO_REGULATION_OF_SEQUESTERING_OF_CALCIIUM_ION                              | 102  | 0.575 | 2.142 | <0.001         | 0.013          |
| GO_EXTRACELLULAR_STRUCTURE_ORGANIZATION                                    | 295  | 0.597 | 2.137 | <0.001         | 0.014          |
| GO_GLOMERULUS_DEVELOPMENT                                                  | 49   | 0.679 | 2.135 | <0.001         | 0.013          |
| GO_MUSCLE_SYSTEM_PROCESS                                                   | 277  | 0.526 | 2.135 | <0.001         | 0.013          |
| GO_NEPHRON_DEVELOPMENT                                                     | 115  | 0.569 | 2.133 | <0.001         | 0.012          |
| GO_GROWTH_FACTOR_BINDING                                                   | 122  | 0.610 | 2.132 | <0.001         | 0.012          |
| GO_VASCULATURE_DEVELOPMENT                                                 | 457  | 0.532 | 2.131 | <0.001         | 0.011          |
| GO_REGULATION_OF_CALCIIUM_ION_TRANSPORT_INTO_CYTOSOL                       | 88   | 0.588 | 2.130 | <0.001         | 0.011          |
| GO_REGULATION_OF_OSSIFICATION                                              | 170  | 0.562 | 2.129 | <0.001         | 0.010          |
| GO_REGULATION_OF_ION_HOMEOSTASIS                                           | 193  | 0.514 | 2.128 | <0.001         | 0.010          |
| GO_CELL_ADHESION_MOLECULE_BINDING                                          | 176  | 0.564 | 2.127 | <0.001         | 0.010          |
| GO_EMBRYONIC_DIGESTIVE_TRACT_                                              | 32   | 0.659 | 2.118 | <0.001         | 0.011          |

| DEVELOPMENT                                                         |     |       |       |        |       |
|---------------------------------------------------------------------|-----|-------|-------|--------|-------|
| GO_BASEMENT_MEMBRANE                                                | 90  | 0.646 | 2.113 | <0.001 | 0.012 |
| GO_CYCLIC_NUCLEOTIDE_METABOLIC_PROCESS                              | 57  | 0.650 | 2.111 | <0.001 | 0.011 |
| GO_POSITIVE_REGULATION_OF_VASCULATURE_DEVELOPMENT                   | 129 | 0.591 | 2.110 | <0.001 | 0.011 |
| GO_CELL_SUBSTRATE_ADHESION                                          | 161 | 0.542 | 2.105 | <0.001 | 0.012 |
| GO_EXTRACELLULAR_MATRIX_STRUCTURAL_CONSTITUENT                      | 73  | 0.670 | 2.102 | <0.001 | 0.012 |
| GO_MUSCLE_CONTRACTION                                               | 228 | 0.531 | 2.102 | <0.001 | 0.012 |
| GO_POSITIVE_REGULATION_OF_CALCIUM_ION_TRANSMEMBRANE_TRANSPORT       | 55  | 0.574 | 2.099 | <0.001 | 0.012 |
| GO_REGULATION_OF_ENDOTHELIAL_CELL_MIGRATION                         | 108 | 0.556 | 2.099 | <0.001 | 0.011 |
| GO_ANGIOGENESIS                                                     | 284 | 0.544 | 2.091 | <0.001 | 0.012 |
| GO_REGULATION_OF_EPITHELIAL_CELL_MIGRATION                          | 160 | 0.510 | 2.089 | <0.001 | 0.012 |
| GO_NEGATIVE_REGULATION_OF_LOCOMOTION                                | 249 | 0.512 | 2.089 | <0.001 | 0.012 |
| GO_CELL_MATRIX_ADHESION                                             | 116 | 0.564 | 2.086 | <0.001 | 0.012 |
| GO_REGULATION_OF_BMP_SIGNALING_PATHWAY                              | 75  | 0.583 | 2.086 | <0.001 | 0.012 |
| GO_REGULATION_OF_HEART_CONTRACTION                                  | 216 | 0.520 | 2.086 | <0.001 | 0.011 |
| GO_CIRCULATORY_SYSTEM_PROCESS                                       | 354 | 0.489 | 2.085 | <0.001 | 0.011 |
| GO_REGULATION_OF_OSTEOSTEIN_DIFFERENTIATION                         | 107 | 0.572 | 2.082 | <0.001 | 0.011 |
| GO_BLOOD_VESSEL_MORPHOGENESIS                                       | 355 | 0.528 | 2.080 | <0.001 | 0.011 |
| GO_REGULATION_OF_CARTILAGE_DEVELOPMENT                              | 56  | 0.658 | 2.078 | <0.001 | 0.012 |
| GO_MUSCLE_ORGAN_DEVELOPMENT                                         | 259 | 0.504 | 2.076 | <0.001 | 0.012 |
| GO_REGULATION_OF_RELEASE_OF_SEQUENCESTERED_CALCIUM_ION_INTO_CYTOSOL | 71  | 0.592 | 2.076 | <0.001 | 0.012 |
| GO_NEGATIVE_REGULATION_OF_SMOOTH_MUSCLE_CELL_PROLIFERATION          | 35  | 0.662 | 2.076 | <0.001 | 0.011 |
| GO_CYTOSOLIC_CALCIUM_ION_TRANSPORT                                  | 52  | 0.611 | 2.074 | <0.001 | 0.011 |
| GO_SMOOTHENED_SIGNALING_PATHWAY                                     | 69  | 0.565 | 2.073 | <0.001 | 0.011 |
| GO_SULFUR_COMPOUND_BINDING                                          | 227 | 0.495 | 2.073 | <0.001 | 0.011 |
| GO_REGULATION_OF_BLOOD_CIRCULATION                                  | 285 | 0.509 | 2.071 | <0.001 | 0.011 |

|                                                                               |     |       |       |        |       |
|-------------------------------------------------------------------------------|-----|-------|-------|--------|-------|
| GO_POSITIVE_REGULATION_OF_CALCIUM_ION_TRANSPORT_INTO_CYTOSOL                  | 49  | 0.590 | 2.069 | <0.001 | 0.011 |
| GO_COLLAGEN_TRIMER                                                            | 86  | 0.670 | 2.069 | <0.001 | 0.011 |
| GO_REGULATION_OF_CALCIUM_ION_TRANSPORT                                        | 199 | 0.515 | 2.068 | <0.001 | 0.011 |
| GO_PROTEIN_LOCALIZATION_TO_CELL_SURFACE                                       | 22  | 0.723 | 2.067 | <0.001 | 0.011 |
| GO_CGMP_METABOLIC_PROCESS                                                     | 23  | 0.748 | 2.057 | <0.001 | 0.012 |
| GO_POSITIVE_REGULATION_OF_OSTEOSTEOSTEOSTEM_CELL_DIFFERENTIATION              | 57  | 0.613 | 2.056 | <0.001 | 0.012 |
| GO_NEGATIVE_REGULATION_OF_BMP_SIGNALING_PATHWAY                               | 42  | 0.648 | 2.054 | <0.001 | 0.012 |
| GO_OUTFLOW_TRACT_MORPHOGENESIS                                                | 56  | 0.592 | 2.053 | <0.001 | 0.012 |
| GO_NEURON_RECOGNITION                                                         | 33  | 0.672 | 2.052 | <0.001 | 0.012 |
| GO_REGULATION_OF_VASCULATURE_DEVELOPMENT                                      | 223 | 0.545 | 2.052 | <0.001 | 0.012 |
| GO_PLATELET_DEGRANULATION                                                     | 103 | 0.601 | 2.051 | <0.001 | 0.012 |
| GO_REGULATION_OF_BIOMINERAL_TISSUE_DEVELOPMENT                                | 71  | 0.571 | 2.051 | <0.001 | 0.011 |
| GO_MELANOCYTE_DIFFERENTIATION                                                 | 17  | 0.705 | 2.048 | <0.001 | 0.012 |
| GO_ACTION_POTENTIAL                                                           | 92  | 0.543 | 2.047 | <0.001 | 0.012 |
| GO_REGULATION_OF_SYSTEM_PROCESS                                               | 490 | 0.487 | 2.047 | <0.001 | 0.011 |
| GO_MULTICELLULAR_ORGANISMAL_SIGNALING                                         | 121 | 0.538 | 2.047 | <0.001 | 0.011 |
| GO_EMBRYONIC_DIGESTIVE_TRACT_MORPHOGENESIS                                    | 17  | 0.725 | 2.045 | <0.001 | 0.012 |
| GO_NEGATIVE_REGULATION_OF_CELLULAR_RESPONSE_TO_GROWTH_FACTOR_STIMULUS         | 119 | 0.523 | 2.044 | <0.001 | 0.011 |
| GO_REGULATION_OF_CARDIAC_CONDUCTION                                           | 66  | 0.599 | 2.043 | 0.002  | 0.011 |
| GO_SECOND_MESSENGER_MEDIATED_SIGNALING                                        | 153 | 0.543 | 2.043 | <0.001 | 0.011 |
| GO_MUSCLE_STRUCTURE_DEVELOPMENT                                               | 411 | 0.481 | 2.041 | <0.001 | 0.011 |
| GO_REGULATION_OF_CALCIUM_ION_TRANSMEMBRANE_TRANSPORT                          | 110 | 0.527 | 2.041 | <0.001 | 0.011 |
| GO_CALCIUM_MEDIATED_SIGNALING                                                 | 84  | 0.568 | 2.039 | 0.002  | 0.011 |
| GO_REGULATION_OF_CHONDROCYTE_DIFFERENTIATION                                  | 42  | 0.655 | 2.036 | <0.001 | 0.012 |
| GO_REGULATION_OF_TRANSMEMBRANE_RECEPTOR_PROTEIN_SERINE_THROSYLPHOSPHORYLATION | 200 | 0.486 | 2.036 | <0.001 | 0.012 |

|                                                                                |     |       |       |        |       |
|--------------------------------------------------------------------------------|-----|-------|-------|--------|-------|
| EONINE_KINASE_SIGNALING_PATHWAY                                                |     |       |       |        |       |
| Y                                                                              |     |       |       |        |       |
| GO_PEPTIDE_RECEPTOR_ACTIVITY                                                   | 126 | 0.567 | 2.032 | <0.001 | 0.012 |
| GO_REGULATION_OF_MUSCLE_CONTRACTION                                            | 144 | 0.520 | 2.032 | <0.001 | 0.012 |
| GO_REGULATION_OF_PHOSPHOLIPASE_ACTIVITY                                        | 64  | 0.616 | 2.030 | <0.001 | 0.012 |
| GO_MESONEPHROS_DEVELOPMENT                                                     | 90  | 0.537 | 2.028 | <0.001 | 0.012 |
| GO_POSITIVE_REGULATION_OF_ENDOTHELIAL_CELL_MIGRATION                           | 65  | 0.577 | 2.025 | 0.002  | 0.013 |
| GO_REGULATION_OF_ERK1_AND_ERK2_CASCADE                                         | 227 | 0.479 | 2.023 | <0.001 | 0.013 |
| GO_REGULATION_OF_VASCULAR_ENDOTHELIAL_GROWTH_FACTOR_RECEPTOR_SIGNALING_PATHWAY | 26  | 0.680 | 2.023 | <0.001 | 0.013 |
| GO_DIGESTIVE_SYSTEM_DEVELOPMENT                                                | 142 | 0.492 | 2.023 | <0.001 | 0.012 |
| GO_T_TUBULE                                                                    | 45  | 0.640 | 2.022 | 0.002  | 0.012 |
| GO_FIBRIL_ORGANIZATION                                                         | 19  | 0.758 | 2.022 | <0.001 | 0.012 |
| GO_BONE_DEVELOPMENT                                                            | 150 | 0.505 | 2.021 | <0.001 | 0.012 |
| GO_NEGATIVE_REGULATION_OF_CYCLIC_NUCLEOTIDE_METABOLIC_PROCESS                  | 41  | 0.609 | 2.020 | <0.001 | 0.012 |
| GO_PLATELET_ALPHA_GRANULE                                                      | 74  | 0.624 | 2.019 | <0.001 | 0.012 |
| GO_REGULATION_OF_SMAD_PROTEIN_IMPORT_INTO_NUCLEUS                              | 16  | 0.738 | 2.017 | <0.001 | 0.012 |
| GO_POSITIVE_REGULATION_OF_SYNAPSE_ASSEMBLY                                     | 55  | 0.609 | 2.017 | <0.001 | 0.012 |
| GO_PHOSPHOLIPASE_C_ACTIVATING_G_PROTEIN_COUPLED_RECEPTOR_SIGNALING_PATHWAY     | 81  | 0.557 | 2.017 | <0.001 | 0.012 |
| GO_POSITIVE_REGULATION_OF_SMALL_GTPASE_MEDIATED_SIGNAL_TRANSDUCTION            | 38  | 0.611 | 2.015 | 0.002  | 0.012 |
| GO_VASCULAR_PROCESS_IN_CIRCULATORY_SYSTEM                                      | 158 | 0.518 | 2.015 | <0.001 | 0.012 |
| GO_CYCLIC_NUCLEOTIDE_BIOSYNTHETIC_PROCESS                                      | 34  | 0.668 | 2.013 | <0.001 | 0.012 |
| GO_FOREBRAIN_NEURON_DEVELOPMENT                                                | 34  | 0.625 | 2.012 | <0.001 | 0.012 |
| GO_MESENCHYME_DEVELOPMENT                                                      | 183 | 0.522 | 2.011 | <0.001 | 0.013 |
| GO_REGULATION_OF_SMOOTH_MUSCLE_CONTRACTION                                     | 59  | 0.597 | 2.011 | <0.001 | 0.012 |
| GO_ATRIAL_SEPTUM_DEVELOPMENT                                                   | 17  | 0.721 | 2.010 | <0.001 | 0.013 |

---

|                                                                                      |     |       |       |        |       |
|--------------------------------------------------------------------------------------|-----|-------|-------|--------|-------|
| GO_POSITIVE_REGULATION_OF_BIOMI<br>NERAL_TISSUE_DEVELOPMENT                          | 37  | 0.612 | 2.009 | <0.001 | 0.013 |
| GO_GANGLIOSIDE_BIOSYNTHETIC_PR<br>OCESS                                              | 18  | 0.716 | 2.009 | <0.001 | 0.013 |
| GO_POSITIVE_REGULATION_OF_LOCO<br>MOTION                                             | 397 | 0.474 | 2.008 | <0.001 | 0.013 |
| GO_REGULATION_OF_PHOSPHATIDYLI<br>NOSITOL_3_KINASE_SIGNALING                         | 135 | 0.500 | 2.008 | <0.001 | 0.013 |
| GO_POSITIVE_REGULATION_OF_CALCI<br>UM_ION_TRANSPORT                                  | 102 | 0.523 | 2.008 | <0.001 | 0.012 |
| GO_RESPONSE_TO_PROSTAGLANDIN                                                         | 34  | 0.622 | 2.007 | <0.001 | 0.012 |
| GO_COLLAGEN_BINDING                                                                  | 60  | 0.653 | 2.006 | 0.004  | 0.012 |
| GO_EXTRACELLULAR_MATRIX_ASSE<br>MBLY                                                 | 16  | 0.812 | 2.006 | <0.001 | 0.012 |
| GO_POSITIVE_REGULATION_OF_CELL_<br>SUBSTRATE_ADHESION                                | 95  | 0.537 | 2.004 | <0.001 | 0.013 |
| GO_REGULATION_OF_BLOOD_PRESSU<br>RE                                                  | 164 | 0.506 | 2.004 | <0.001 | 0.013 |
| GO_REGULATION_OF_METAL_ION_TR<br>ANSPORT                                             | 312 | 0.467 | 2.004 | <0.001 | 0.012 |
| GO_CARTILAGE_DEVELOPMENT                                                             | 143 | 0.535 | 2.003 | <0.001 | 0.012 |
| GO_CELLULAR_RESPONSE_TO_VASCU<br>LAR_ENDOTHELIAL_GROWTH_FACTO<br>R_STIMULUS          | 29  | 0.701 | 2.002 | <0.001 | 0.012 |
| GO_REGULATION_OF_CELL_SUBSTRAT<br>E_ADHESION                                         | 165 | 0.504 | 2.002 | <0.001 | 0.012 |
| GO_TRANSMEMBRANE_RECEPTOR_PR<br>OTEIN_KINASE_ACTIVITY                                | 81  | 0.578 | 2.002 | <0.001 | 0.012 |
| GO_REGULATION_OF_CARDIAC_MUSC<br>LE_CELL_DIFFERENTIATION                             | 19  | 0.642 | 2.000 | <0.001 | 0.012 |
| GO_SMOOTH_MUSCLE_CONTRACTION                                                         | 45  | 0.658 | 1.998 | <0.001 | 0.013 |
| GO_KIDNEY_EPITHELIUM_DEVELOPM<br>ENT                                                 | 125 | 0.510 | 1.998 | <0.001 | 0.013 |
| GO_SENSORY_PERCEPTION_OF_PAIN                                                        | 72  | 0.558 | 1.997 | <0.001 | 0.013 |
| GO_ADENYLATE_CYCLASE_MODULAT<br>ING_G_PROTEIN_COUPLED_RECEPTOR<br>_SIGNALING_PATHWAY | 135 | 0.565 | 1.997 | <0.001 | 0.013 |
| GO_POSITIVE_REGULATION_OF_NEUR<br>ON_DIFFERENTIATION                                 | 295 | 0.479 | 1.996 | <0.001 | 0.013 |
| GO_ENDOTHELIUM_DEVELOPMENT                                                           | 88  | 0.552 | 1.995 | 0.004  | 0.013 |
| GO_NEGATIVE_REGULATION_OF_EPIT<br>HELIAL_CELL_MIGRATION                              | 49  | 0.556 | 1.995 | <0.001 | 0.013 |
| GO_RENAL_SYSTEM_VASCULATURE_D<br>EVELOPMENT                                          | 19  | 0.816 | 1.994 | <0.001 | 0.013 |



|                                                               |     |       |       |        |       |
|---------------------------------------------------------------|-----|-------|-------|--------|-------|
| GO_NEGATIVE_REGULATION_OF_NUCLEOTIDE_METABOLIC_PROCESS        | 61  | 0.536 | 1.994 | <0.001 | 0.012 |
| GO_CATION_CHANNEL_COMPLEX                                     | 159 | 0.542 | 1.994 | <0.001 | 0.012 |
| GO_GLYCOSPHINGOLIPID_BIOSYNTHETIC_PROCESS                     | 24  | 0.649 | 1.994 | <0.001 | 0.012 |
| GO_CONTRACTILE_FIBER                                          | 205 | 0.528 | 1.990 | 0.002  | 0.013 |
| GO_AMINOGLYCAN_CATABOLIC_PROCESS                              | 66  | 0.552 | 1.989 | <0.001 | 0.013 |
| GO_MESENCHYMAL_CELL_DIFFERENTIATION                           | 131 | 0.520 | 1.989 | <0.001 | 0.013 |
| GO_CONNECTIVE_TISSUE_DEVELOPMENT                              | 188 | 0.516 | 1.987 | <0.001 | 0.013 |
| GO_DIVALENT_INORGANIC_CATION_HOMEOSTASIS                      | 328 | 0.461 | 1.985 | <0.001 | 0.013 |
| GO_CALCIIUM_ION_IMPORT_INTO_CYTOSOL                           | 41  | 0.599 | 1.983 | 0.002  | 0.013 |
| GO_MULTICELLULAR_ORGANISM_METABOLIC_PROCESS                   | 87  | 0.623 | 1.983 | 0.002  | 0.013 |
| GO_REGULATION_OF_POSTSYNAPTIC_MEMBRANE_POTENTIAL              | 54  | 0.623 | 1.983 | <0.001 | 0.013 |
| GO_POSITIVE_REGULATION_OF_CAMP_METABOLIC_PROCESS              | 86  | 0.560 | 1.981 | <0.001 | 0.013 |
| GO_POSITIVE_REGULATION_OF_BMP_SIGNALING_PATHWAY               | 30  | 0.605 | 1.980 | <0.001 | 0.014 |
| GO_POSITIVE_REGULATION_OF_EPITHELIAL_CELL_MIGRATION           | 101 | 0.510 | 1.979 | <0.001 | 0.014 |
| GO_CGMP_BIOSYNTHETIC_PROCESS                                  | 15  | 0.752 | 1.978 | <0.001 | 0.014 |
| GO_KIDNEY_MORPHOGENESIS                                       | 82  | 0.521 | 1.978 | <0.001 | 0.014 |
| GO_REGULATION_OF_SYNAPSE_ASSEMBLY                             | 72  | 0.565 | 1.978 | <0.001 | 0.014 |
| GO_CALCIIUM_ION_TRANSPORT                                     | 209 | 0.477 | 1.977 | <0.001 | 0.014 |
| GO_NEPHRON_EPITHELIUM_DEVELOPMENT                             | 93  | 0.516 | 1.975 | <0.001 | 0.014 |
| GO_POSITIVE_REGULATION_OF_BLOOD_PRESSURE                      | 35  | 0.607 | 1.975 | <0.001 | 0.014 |
| GO_REGULATION_OF_SMOOTHENED_SIGNALING_PATHWAY                 | 62  | 0.577 | 1.975 | <0.001 | 0.014 |
| GO_BASAL_PART_OF_CELL                                         | 49  | 0.558 | 1.975 | <0.001 | 0.014 |
| GO_REGULATION_OF_MEMBRANE_DEPOLARIZATION                      | 39  | 0.553 | 1.973 | <0.001 | 0.014 |
| GO_NEGATIVE_REGULATION_OF_EPITHELIAL_CELL_MIGRATION           | 35  | 0.622 | 1.973 | <0.001 | 0.014 |
| GO_POSITIVE_REGULATION_OF_CYCLIC_NUCLEOTIDE_METABOLIC_PROCESS | 106 | 0.542 | 1.972 | <0.001 | 0.014 |

## S

---

|                                                                                                    |     |       |       |        |       |
|----------------------------------------------------------------------------------------------------|-----|-------|-------|--------|-------|
| GO_REGULATION_OF_CATION_TRANSMEMBRANE_TRANSPORT                                                    | 199 | 0.463 | 1.972 | <0.001 | 0.014 |
| GO_REGULATION_OF_PHOSPHOLIPASE_C_ACTIVITY                                                          | 39  | 0.699 | 1.972 | <0.001 | 0.014 |
| GO_NEURAL_CREAST_CELL_DIFFERENTIATION                                                              | 74  | 0.541 | 1.972 | <0.001 | 0.014 |
| GO_NEGATIVE_REGULATION_OF_TRANSMEMBRANE_RECEPTOR_PROTEIN_SERINE_THREONINE_KINASE_SIGNALING_PATHWAY | 101 | 0.515 | 1.972 | 0.004  | 0.014 |
| GO_POSITIVE_REGULATION_OF_ADENYLATE_CYCLASE_ACTIVITY                                               | 46  | 0.607 | 1.971 | <0.001 | 0.014 |
| GO_G_PROTEIN_COUPLED_RECEPTOR_SIGNALING_PATHWAY_COUPLED_TO_CYCLIC_NUCLEOTIDE_SECOND_MESSANGER      | 161 | 0.551 | 1.970 | <0.001 | 0.014 |
| GO_REGULATION_OF_CYCLIC_NUCLEOTIDE_METABOLIC_PROCESS                                               | 151 | 0.526 | 1.969 | <0.001 | 0.014 |
| GO_REGULATION_OF_VASOCONSTRICTION                                                                  | 65  | 0.578 | 1.969 | <0.001 | 0.014 |
| GO_RENAL_SYSTEM_PROCESS                                                                            | 98  | 0.513 | 1.968 | <0.001 | 0.014 |
| GO_PLATELET_DENSE_GRANULE                                                                          | 19  | 0.687 | 1.967 | 0.002  | 0.014 |
| GO_POSITIVE_REGULATION_OF_LYASE_ACTIVITY                                                           | 58  | 0.561 | 1.967 | <0.001 | 0.014 |
| GO_POTASSIUM_CHANNEL_COMPLEX                                                                       | 88  | 0.564 | 1.967 | <0.001 | 0.014 |
| GO_INSULIN_LIKE_GROWTH_FACTOR_BINDING                                                              | 25  | 0.725 | 1.966 | <0.001 | 0.014 |
| GO_REGULATION_OF_CALCIIUM_IION_IMPORT                                                              | 97  | 0.510 | 1.965 | 0.002  | 0.014 |
| GO_SECRETORY_GRANULE_LUMEN                                                                         | 80  | 0.608 | 1.965 | 0.002  | 0.014 |
| GO_REGULATION_OF_AMINE_TRANSPORT                                                                   | 69  | 0.570 | 1.964 | <0.001 | 0.014 |
| GO_NEGATIVE_REGULATION_OF_CALCIIUM_MEDIATED_SIGNALING                                              | 18  | 0.713 | 1.964 | 0.002  | 0.014 |
| GO_POSITIVE_REGULATION_OF_CATION_TRANSMEMBRANE_TRANSPORT                                           | 91  | 0.500 | 1.964 | <0.001 | 0.014 |
| GO_POSITIVE_REGULATION_OF_NUCLEOTIDE_METABOLIC_PROCESS                                             | 128 | 0.522 | 1.962 | <0.001 | 0.014 |
| GO_POSITIVE_REGULATION_OF_PHOSPHOLIPASE_ACTIVITY                                                   | 53  | 0.620 | 1.962 | <0.001 | 0.014 |
| GO_NEGATIVE_REGULATION_OF_STRESS_FIBER_ASSEMBLY                                                    | 16  | 0.712 | 1.961 | 0.004  | 0.014 |
| GO_BONE_GROWTH                                                                                     | 20  | 0.687 | 1.961 | 0.002  | 0.014 |

|                                                                                         |     |       |       |        |       |
|-----------------------------------------------------------------------------------------|-----|-------|-------|--------|-------|
| GO_REGULATION_OF_MUSCLE_SYSTE<br>M_PROCESS                                              | 191 | 0.488 | 1.961 | <0.001 | 0.014 |
| GO_REGULATION_OF_CELL_JUNCTION<br>_ASSEMBLY                                             | 67  | 0.571 | 1.961 | <0.001 | 0.014 |
| GO_CARDIAC_CHAMBER_MORPHOGE<br>NESIS                                                    | 101 | 0.488 | 1.961 | <0.001 | 0.014 |
| GO_REGULATION_OF_RENAL_SYSTEM<br>_PROCESS                                               | 37  | 0.628 | 1.961 | 0.002  | 0.014 |
| GO_ENSHEATHMENT_OF_NEURONS                                                              | 87  | 0.509 | 1.960 | <0.001 | 0.014 |
| GO_REGULATION_OF_CATION_CHANN<br>EL_ACTIVITY                                            | 83  | 0.499 | 1.960 | <0.001 | 0.014 |
| GO_RESPONSE_TO_BMP                                                                      | 88  | 0.549 | 1.960 | <0.001 | 0.014 |
| GO_REGULATION_OF_ACTIN_FILAMEN<br>T_BUNDLE_ASSEMBLY                                     | 73  | 0.515 | 1.960 | <0.001 | 0.014 |
| GO_CELL_COMMUNICATION_INVOLVE<br>D_IN_CARDIAC_CONDUCTION                                | 36  | 0.600 | 1.960 | <0.001 | 0.014 |
| GO_CYCLIC_NUCLEOTIDE_PHOSPHODI<br>ESTERASE_ACTIVITY                                     | 25  | 0.663 | 1.959 | <0.001 | 0.014 |
| GO_SKELETAL_MUSCLE_ORGAN_DEV<br>ELOPMENT                                                | 126 | 0.488 | 1.959 | <0.001 | 0.014 |
| GO_REGULATION_OF_SYNAPTIC_TRA<br>NSMISSION_Glutamatergic                                | 49  | 0.612 | 1.957 | <0.001 | 0.014 |
| GO_FIBRONECTIN_BINDING                                                                  | 26  | 0.697 | 1.956 | <0.001 | 0.014 |
| GO_REGULATION_OF_CALCINEURIN_N<br>FAT_SIGNALING_CASCADE                                 | 16  | 0.693 | 1.956 | 0.004  | 0.014 |
| GO_I_BAND                                                                               | 118 | 0.572 | 1.955 | 0.004  | 0.014 |
| GO_LUNG_ALVEOLUS_DEVELOPMENT                                                            | 40  | 0.589 | 1.955 | 0.002  | 0.014 |
| GO_REGULATION_OF_CHEMOTAXIS                                                             | 176 | 0.515 | 1.955 | 0.002  | 0.014 |
| GO_REGULATION_OF_SYNAPSE_ORGA<br>NIZATION                                               | 105 | 0.522 | 1.954 | <0.001 | 0.014 |
| GO_REGULATION_OF_CAMP_METABO<br>LIC_PROCESS                                             | 126 | 0.535 | 1.953 | <0.001 | 0.014 |
| GO_REGULATION_OF_ENDOTHELIAL_<br>CELL_PROLIFERATION                                     | 95  | 0.541 | 1.953 | <0.001 | 0.014 |
| GO_RESPONSE_TO_PROSTAGLANDIN_<br>E                                                      | 25  | 0.631 | 1.953 | <0.001 | 0.014 |
| GO_POSITIVE_REGULATION_OF_MUSC<br>LE_CELL_DIFFERENTIATION                               | 81  | 0.506 | 1.951 | <0.001 | 0.014 |
| GO_POSITIVE_REGULATION_OF_MYOB<br>LAST_DIFFERENTIATION                                  | 21  | 0.696 | 1.951 | 0.002  | 0.014 |
| GO_NEGATIVE_CHEMOTAXIS                                                                  | 39  | 0.603 | 1.950 | 0.002  | 0.014 |
| GO_REGULATION_OF_SYSTEMIC_ARTE<br>RIAL_BLOOD_PRESSURE_MEDIATED_B<br>Y_A_CHEMICAL_SIGNAL | 45  | 0.579 | 1.950 | <0.001 | 0.014 |

|                                                                   |     |       |       |        |       |
|-------------------------------------------------------------------|-----|-------|-------|--------|-------|
| GO_HEART_DEVELOPMENT                                              | 449 | 0.450 | 1.949 | <0.001 | 0.014 |
| GO_REGULATION_OF_MEMBRANE_POTENTIAL                               | 329 | 0.444 | 1.949 | <0.001 | 0.014 |
| GO_RESPONSE_TO_FLUID_SHEAR_STRESS                                 | 33  | 0.623 | 1.949 | <0.001 | 0.014 |
| GO_REGULATION_OF_MYOBLAST_DIFFERENTIATION                         | 45  | 0.565 | 1.949 | <0.001 | 0.014 |
| GO_REGULATION_OF_SYSTEMIC_ARTERIAL_BLOOD_PRESSURE                 | 82  | 0.523 | 1.948 | <0.001 | 0.014 |
| GO_MUSCLE_TISSUE_DEVELOPMENT                                      | 261 | 0.455 | 1.947 | <0.001 | 0.015 |
| GO_DELAYED_RECTIFIER_POTASSIUM_CHANNEL_ACTIVITY                   | 35  | 0.640 | 1.946 | <0.001 | 0.014 |
| GO_POSITIVE_REGULATION_OF_NERVOUS_SYSTEM_DEVELOPMENT              | 413 | 0.447 | 1.946 | <0.001 | 0.014 |
| GO_TRANSMEMBRANE_RECEPTOR_PROTEIN_TYROSINE_KINASE_ACTIVITY        | 64  | 0.556 | 1.946 | <0.001 | 0.014 |
| GO_GOLGI_LUMEN                                                    | 84  | 0.515 | 1.946 | <0.001 | 0.014 |
| GO_ARTERY_DEVELOPMENT                                             | 75  | 0.559 | 1.946 | <0.001 | 0.014 |
| GO_PLATELET_ALPHA_GRANULE_LUMEN                                   | 54  | 0.656 | 1.945 | <0.001 | 0.014 |
| GO_MEMBRANE_DEPOLARIZATION                                        | 59  | 0.564 | 1.945 | <0.001 | 0.014 |
| GO_SMOOTH_MUSCLE_CELL_DIFFERENTIATION                             | 30  | 0.615 | 1.945 | <0.001 | 0.014 |
| GO_ACTIVATION_OF_ADENYLATE_CYCLASE_ACTIVITY                       | 39  | 0.604 | 1.942 | 0.002  | 0.015 |
| GO_REGULATION_OF_NUCLEOTIDE_METABOLIC_PROCESS                     | 202 | 0.472 | 1.942 | <0.001 | 0.015 |
| GO_POSITIVE_REGULATION_OF_PHOSPHATIDYLINOSITOL_3_KINASE_SIGNALING | 59  | 0.564 | 1.942 | <0.001 | 0.015 |
| GO_COLLAGEN_FIBRIL_ORGANIZATION                                   | 36  | 0.716 | 1.941 | 0.004  | 0.015 |
| GO_NEGATIVE_REGULATION_OF_ACTIN_FILAMENT_BUNDLE_ASSEMBLY          | 18  | 0.709 | 1.940 | 0.002  | 0.015 |
| GO_CARDIAC_CONDUCTION                                             | 81  | 0.530 | 1.940 | 0.002  | 0.015 |
| GO_MEMBRANE_DEPOLARIZATION_DURING_ACTION_POTENTIAL                | 39  | 0.626 | 1.940 | <0.001 | 0.015 |
| GO_REGULATION_OF_VASCULAR_PERMEABILITY                            | 30  | 0.616 | 1.939 | <0.001 | 0.015 |
| GO_PHASIC_SMOOTH_MUSCLE_CONTRACTION                               | 16  | 0.709 | 1.939 | <0.001 | 0.015 |
| GO_POSITIVE_REGULATION_OF_LIPASE_ACTIVITY                         | 66  | 0.591 | 1.937 | <0.001 | 0.015 |
| GO_SULFUR_COMPOUND_CATABOLIC_                                     | 39  | 0.583 | 1.936 | <0.001 | 0.015 |

---

| PROCESS                                                              |     |       |       |        |       |
|----------------------------------------------------------------------|-----|-------|-------|--------|-------|
| GO_REGULATION_OF_ADENYLATE_CYCLASE_ACTIVITY                          | 68  | 0.555 | 1.934 | <0.001 | 0.015 |
| GO_REGULATION_OF_CALCIIUM_MEDIATED_SIGNALING                         | 74  | 0.550 | 1.932 | 0.002  | 0.016 |
| GO_RETINAL_GANGLION_CELL_AXON_GUIDANCE                               | 18  | 0.687 | 1.932 | 0.002  | 0.016 |
| GO_CARDIAC_CHAMBER_DEVELOPMENT                                       | 140 | 0.473 | 1.931 | <0.001 | 0.016 |
| GO_CALCIIUM_ACTIVATED_POTASSIUM_CHANNEL_ACTIVITY                     | 16  | 0.675 | 1.928 | 0.002  | 0.016 |
| GO_POSITIVE_REGULATION_OF_AXONOGENESIS                               | 68  | 0.518 | 1.928 | <0.001 | 0.016 |
| GO_NEGATIVE_REGULATION_OF_OSSIFICATION                               | 64  | 0.544 | 1.927 | <0.001 | 0.016 |
| GO_POSITIVE_REGULATION_OF_SMOOTHENED_SIGNALING_PATHWAY               | 24  | 0.628 | 1.927 | <0.001 | 0.016 |
| GO_SKELETAL_SYSTEM_DEVELOPMENT                                       | 441 | 0.438 | 1.927 | <0.001 | 0.016 |
| GO_MAIN_AXON                                                         | 57  | 0.535 | 1.926 | <0.001 | 0.017 |
| GO_POSITIVE_REGULATION_OF_TRANSMEMBRANE_TRANSPORT                    | 123 | 0.465 | 1.925 | <0.001 | 0.017 |
| GO_ACTIVATION_OF_PHOSPHOLIPASE_C_ACTIVITY                            | 27  | 0.687 | 1.925 | <0.001 | 0.017 |
| GO_G_PROTEIN_BETA_GAMMA_SUBUNIT_COMPLEX_BINDING                      | 20  | 0.655 | 1.925 | <0.001 | 0.017 |
| GO_RESPONSE_TO_PAIN                                                  | 29  | 0.621 | 1.924 | <0.001 | 0.017 |
| GO_CAMP_METABOLIC_PROCESS                                            | 34  | 0.644 | 1.924 | <0.001 | 0.016 |
| GO_POSITIVE_REGULATION_OF_ENDOTHELIAL_CELL_PROLIFERATION             | 66  | 0.561 | 1.923 | <0.001 | 0.017 |
| GO_CELL_CELL_SIGNALING_INVOLVED_IN_CARDIAC_CONDUCTION                | 21  | 0.680 | 1.923 | 0.004  | 0.017 |
| GO_ENDOTHELIAL_CELL_DIFFERENTIATION                                  | 70  | 0.541 | 1.922 | 0.002  | 0.017 |
| GO_REGULATION_OF_HEART_RATE                                          | 83  | 0.515 | 1.922 | <0.001 | 0.017 |
| GO_REGULATION_OF_FIBROBLAST_GROWTH_FACTOR_RECEPTOR_SIGNALING_PATHWAY | 25  | 0.611 | 1.922 | 0.002  | 0.017 |
| GO_ANCHORED_COMPONENT_OF_EXTRACELLULAR_SIDE_OF_PLASMA_MEMBRANE       | 19  | 0.674 | 1.919 | 0.008  | 0.017 |
| GO_REGULATION_OF_OSTEOBLAST_PROLIFERATION                            | 22  | 0.644 | 1.919 | 0.002  | 0.017 |
| GO_NEGATIVE_REGULATION_OF_ANGIOGENESIS                               | 32  | 0.587 | 1.919 | 0.002  | 0.017 |

---

|                                                                                |     |       |       |        |       |
|--------------------------------------------------------------------------------|-----|-------|-------|--------|-------|
| N_TRANSPORT                                                                    |     |       |       |        |       |
| GO_CHONDROITIN_SULFATE_PROTEOGLYCAN_METABOLIC_PROCESS                          | 42  | 0.594 | 1.919 | 0.002  | 0.017 |
| GO_HETEROPHILIC_CELL_CELL_ADHESION_VIA_PLASMA_MEMBRANE_CELL_ADHESION_MOLECULES | 38  | 0.596 | 1.918 | 0.002  | 0.017 |
| GO_ADENYLATE_CYCLASE_ACTIVATING_G_PROTEIN_COUPLED_RECEPTOR_SIGNALING_PATHWAY   | 65  | 0.579 | 1.918 | <0.001 | 0.017 |
| GO_LONG_TERM_SYNAPTIC_POTENTIATION                                             | 39  | 0.572 | 1.917 | <0.001 | 0.017 |
| GO_MULTICELLULAR_ORGANISMAL_MACROMOLECULE_METABOLIC_PROCESS                    | 73  | 0.640 | 1.917 | 0.006  | 0.017 |
| GO_CYCLASE_ACTIVITY                                                            | 20  | 0.721 | 1.916 | 0.002  | 0.017 |
| GO_CHANNEL_REGULATOR_ACTIVITY                                                  | 125 | 0.465 | 1.916 | <0.001 | 0.017 |
| GO_REGULATION_OF_LYASE_ACTIVITY                                                | 83  | 0.509 | 1.913 | <0.001 | 0.018 |
| GO_TAXIS                                                                       | 443 | 0.443 | 1.913 | 0.002  | 0.018 |
| GO_CYTOKINE_BINDING                                                            | 88  | 0.595 | 1.913 | <0.001 | 0.018 |
| GO_REGULATION_OF_ACTIN_FILAMENT_BASED_PROCESS                                  | 297 | 0.427 | 1.913 | <0.001 | 0.017 |
| GO_POSITIVE_REGULATION_OF_CELL_DEVELOPMENT                                     | 451 | 0.421 | 1.912 | <0.001 | 0.018 |
| GO_POSITIVE_REGULATION_OF_CELL_PROJECTION_ORGANIZATION                         | 288 | 0.436 | 1.912 | <0.001 | 0.018 |
| GO_REGULATION_OF_SYNAPSE_STRUCTURE_OR_ACTIVITY                                 | 222 | 0.465 | 1.912 | <0.001 | 0.018 |
| GO_POSITIVE_REGULATION_OF_GLUCOSE_TRANSPORT                                    | 39  | 0.571 | 1.912 | <0.001 | 0.018 |
| GO_POSITIVE_REGULATION_OF_NEURON_PROJECTION_DEVELOPMENT                        | 225 | 0.461 | 1.910 | <0.001 | 0.018 |
| GO_REGULATION_OF_LIPASE_ACTIVITY                                               | 83  | 0.569 | 1.910 | <0.001 | 0.018 |
| GO_CELL_CELL_CONTACT_ZONE                                                      | 64  | 0.519 | 1.909 | 0.004  | 0.018 |
| GO_REGULATION_OF_PHOSPHATIDYLINOSITOL_3_KINASE_ACTIVITY                        | 39  | 0.574 | 1.909 | 0.006  | 0.018 |
| GO_MESONEPHRIC_TUBULE_MORPHOGENESIS                                            | 53  | 0.540 | 1.908 | 0.004  | 0.018 |
| GO_POSITIVE_REGULATION_OF_CALCIIUM_ION_IMPORT                                  | 51  | 0.551 | 1.908 | 0.002  | 0.018 |
| GO_SMAD_PROTEIN_SIGNAL_TRANSDUCTION                                            | 52  | 0.545 | 1.908 | 0.002  | 0.018 |
| GO_POSITIVE_REGULATION_OF_BLOOD                                                | 25  | 0.650 | 1.907 | 0.006  | 0.018 |

---

|                                                                  |     |       |       |        |       |
|------------------------------------------------------------------|-----|-------|-------|--------|-------|
| D_VESSEL_ENDOTHELIAL_CELL_MIGRATION                              |     |       |       |        |       |
| GO_DENDRITE_MEMBRANE                                             | 18  | 0.676 | 1.907 | <0.001 | 0.018 |
| GO_REGULATION_OF_NEURON_PROJECTION_DEVELOPMENT                   | 395 | 0.438 | 1.906 | <0.001 | 0.018 |
| GO TRABECULA MORPHOGENESIS                                       | 37  | 0.558 | 1.906 | 0.006  | 0.018 |
| GO_FILOPODIUM_MEMBRANE                                           | 18  | 0.660 | 1.905 | <0.001 | 0.018 |
| GO_NEURON_PROJECTION_MORPHOGENESIS                               | 391 | 0.460 | 1.905 | 0.002  | 0.018 |
| GO_ANCHORED_COMPONENT_OF_MEMBRANE                                | 144 | 0.458 | 1.905 | <0.001 | 0.018 |
| GO_CALCIIUM_ION_IMPORT                                           | 61  | 0.516 | 1.904 | 0.002  | 0.018 |
| GO_STEM_CELL_DIFFERENTIATION                                     | 186 | 0.467 | 1.904 | <0.001 | 0.018 |
| GO_MEMBRANE_MICRODOMAIN                                          | 283 | 0.439 | 1.903 | <0.001 | 0.018 |
| GO_SARCOPLASM                                                    | 66  | 0.527 | 1.903 | 0.004  | 0.018 |
| GO_LEARNING                                                      | 125 | 0.487 | 1.902 | <0.001 | 0.018 |
| GO_REGULATION_OF_ADHERENS_JUNCTION_ORGANIZATION                  | 49  | 0.573 | 1.902 | <0.001 | 0.018 |
| GO_POSITIVE_REGULATION_OF_MAPK_CASCADE                           | 449 | 0.426 | 1.902 | <0.001 | 0.018 |
| GO_GROWTH_FACTOR_ACTIVITY                                        | 149 | 0.470 | 1.902 | 0.002  | 0.018 |
| GO_POSITIVE_REGULATION_OF_CHEMOTAXIS                             | 118 | 0.536 | 1.902 | 0.002  | 0.018 |
| GO_HEART_MORPHOGENESIS                                           | 208 | 0.451 | 1.901 | <0.001 | 0.018 |
| GO_REGULATED_EXOCYTOSIS                                          | 213 | 0.471 | 1.900 | <0.001 | 0.019 |
| GO_REGULATION_OF_PATHWAY_RESTRICTED_SMAD_PROTEIN_PHOSPHORYLATION | 55  | 0.540 | 1.900 | <0.001 | 0.018 |
| GO_PLASMA_MEMBRANE_PROTEIN_COMPLEX                               | 499 | 0.428 | 1.899 | <0.001 | 0.019 |
| GO_POSITIVE_REGULATION_OF_PHOSPHOLIPID_METABOLIC_PROCESS         | 40  | 0.526 | 1.896 | <0.001 | 0.019 |
| GO_TEMPERATURE_HOMEOSTASIS                                       | 26  | 0.592 | 1.896 | <0.001 | 0.019 |
| GO_REGULATION_OF_CELL_MATRIX_ADHESION                            | 87  | 0.505 | 1.895 | <0.001 | 0.019 |
| GO_MUCOPOLYSACCHARIDE_METABOLIC_PROCESS                          | 105 | 0.511 | 1.895 | <0.001 | 0.019 |
| GO_CARDIAC_ATRIUM_DEVELOPMENT                                    | 28  | 0.597 | 1.895 | <0.001 | 0.019 |
| GO_MUSCLE_CELL_DIFFERENTIATION                                   | 226 | 0.464 | 1.895 | 0.002  | 0.019 |
| GO_NEGATIVE_REGULATION_OF_CARTILAGE_DEVELOPMENT                  | 23  | 0.684 | 1.895 | 0.004  | 0.019 |
| GO_INTERCALATED_DISC                                             | 51  | 0.537 | 1.894 | 0.006  | 0.019 |
| GO_POSITIVE_REGULATION_OF_ACTIN                                  | 46  | 0.510 | 1.894 | <0.001 | 0.019 |

|                                                                             |     |       |       |        |       |
|-----------------------------------------------------------------------------|-----|-------|-------|--------|-------|
| _FILAMENT_BUNDLE_ASSEMBLY                                                   |     |       |       |        |       |
| GO_EMBRYONIC_HEMOPOIESIS                                                    | 18  | 0.674 | 1.894 | 0.002  | 0.019 |
| GO_NEUROMUSCULAR_JUNCTION                                                   | 54  | 0.528 | 1.894 | 0.002  | 0.019 |
| GO_REGULATION_OF_MAP_KINASE_ACTIVITY                                        | 312 | 0.416 | 1.893 | <0.001 | 0.019 |
| GO_HOMOPHILIC_CELL_ADHESION_VIA_PLASMA_MEMBRANE_ADHESION_MOLECULES          | 147 | 0.543 | 1.892 | <0.001 | 0.019 |
| GO_RESPONSE_TO_PH                                                           | 37  | 0.545 | 1.892 | 0.002  | 0.019 |
| GO_BRANCHING_MORPHOGENESIS_OF_AN_EPITHELIAL_TUBE                            | 130 | 0.480 | 1.891 | <0.001 | 0.019 |
| GO_WOUND_HEALING                                                            | 439 | 0.428 | 1.889 | <0.001 | 0.020 |
| GO_TRANSMEMBRANE_RECEPTOR_PROTEIN_SERINE_THREONINE_KINASE_SIGNALING_PATHWAY | 183 | 0.453 | 1.889 | 0.002  | 0.019 |
| GO_REGULATION_OF_CALCIUM_ION_TRANSMEMBRANE_TRANSPORTER_ACTIVITY             | 67  | 0.515 | 1.889 | 0.004  | 0.020 |
| GO_RESPONSE_TO_MECHANICAL_STIMULUS                                          | 206 | 0.432 | 1.888 | <0.001 | 0.020 |
| GO_POSITIVE_REGULATION_OF_SYNAPTIC_TRANSMISSION                             | 107 | 0.497 | 1.888 | <0.001 | 0.020 |
| GO_POSITIVE_REGULATION_OF_MYOTUBE_DIFFERENTIATION                           | 28  | 0.579 | 1.887 | 0.002  | 0.020 |
| GO_NEGATIVE_REGULATION_OF_OSTEOSTEIN_DIFFERENTIATION                        | 38  | 0.575 | 1.887 | 0.002  | 0.020 |
| GO_CYCLIC_NUCLEOTIDE_MEDIATED_SIGNALING                                     | 45  | 0.589 | 1.886 | 0.004  | 0.020 |
| GO_REGULATION_OF_CATECHOLAMINE_SECRETION                                    | 41  | 0.613 | 1.886 | <0.001 | 0.020 |
| GO_HEART_PROCESS                                                            | 83  | 0.491 | 1.886 | 0.006  | 0.020 |
| GO_NEGATIVE_REGULATION_OF_VASCULATURE_DEVELOPMENT                           | 74  | 0.560 | 1.885 | 0.006  | 0.020 |
| GO_VASCULOGENESIS                                                           | 57  | 0.553 | 1.885 | 0.004  | 0.020 |
| GO_POSITIVE_REGULATION_OF_ION_TRANSPORT                                     | 228 | 0.425 | 1.884 | <0.001 | 0.020 |
| GO_POSITIVE_REGULATION_OF_STRIATED_MUSCLE_CELL_DIFFERENTIATION              | 50  | 0.511 | 1.883 | <0.001 | 0.020 |
| GO_ORGAN_GROWTH                                                             | 65  | 0.554 | 1.883 | <0.001 | 0.020 |
| GO_CELL_MORPHOGENESIS_INVOLVED_IN_NEURON_DIFFERENTIATION                    | 359 | 0.456 | 1.883 | 0.002  | 0.020 |
| GO_EXTRACELLULAR_MATRIX_DISASSEMBLY                                         | 73  | 0.576 | 1.882 | <0.001 | 0.020 |



|                                  |     |       |       |        |       |
|----------------------------------|-----|-------|-------|--------|-------|
| GO_NEUROMUSCULAR_PROCESS_CON     |     |       |       |        |       |
| TROLLING_BALANCE                 | 50  | 0.542 | 1.881 | <0.001 | 0.020 |
| GO_NEURON_SPINE                  | 116 | 0.463 | 1.881 | 0.002  | 0.020 |
| GO_CELLULAR_RESPONSE_TO_PROST    |     |       |       |        |       |
| AGLANDIN_STIMULUS                | 24  | 0.628 | 1.881 | 0.002  | 0.020 |
| GO_BRANCHING_INVOLVED_IN_URET    |     |       |       |        |       |
| ERIC_BUD_MORPHOGENESIS           | 44  | 0.561 | 1.880 | 0.004  | 0.020 |
| GO_TRANSMISSION_OF_NERVE_IMPUL   |     |       |       |        |       |
| SE                               | 53  | 0.559 | 1.880 | 0.002  | 0.020 |
| GO_TISSUE_REMODELING             | 87  | 0.499 | 1.880 | 0.002  | 0.020 |
| GO_CGMP_BINDING                  | 15  | 0.694 | 1.880 | 0.002  | 0.020 |
| GO_NEGATIVE_REGULATION_OF_CHE    |     |       |       |        |       |
| MOTAXIS                          | 50  | 0.537 | 1.880 | 0.004  | 0.020 |
| GO_PROTEOGLYCAN_METABOLIC_PR     |     |       |       |        |       |
| OCESS                            | 81  | 0.530 | 1.879 | <0.001 | 0.020 |
| GO_NEGATIVE_REGULATION_OF_RESP   |     |       |       |        |       |
| ONSE_TO_EXTERNAL_STIMULUS        | 257 | 0.443 | 1.879 | <0.001 | 0.020 |
| GO_COGNITION                     | 240 | 0.447 | 1.879 | <0.001 | 0.020 |
| GO_FOREBRAIN_CELL_MIGRATION      | 60  | 0.531 | 1.879 | 0.002  | 0.020 |
| GO_REGULATION_OF_CELLULAR_RES    |     |       |       |        |       |
| PONSE_TO_TRANSFORMING_GROWTH     |     |       |       |        |       |
| _FACTOR_BETA_STIMULUS            | 97  | 0.463 | 1.878 | <0.001 | 0.020 |
| GO_ARTERY_MORPHOGENESIS          | 51  | 0.542 | 1.877 | <0.001 | 0.020 |
| GO_RECEPTOR_COMPLEX              | 322 | 0.441 | 1.877 | <0.001 | 0.020 |
| GO_CALCIIUM_ION_TRANSMEMBRANE    |     |       |       |        |       |
| _TRANSPORT                       | 151 | 0.482 | 1.877 | <0.001 | 0.020 |
| GO_POSITIVE_REGULATION_OF_PEPTI  |     |       |       |        |       |
| DYL_TYROSINE_PHOSPHORYLATION     | 155 | 0.448 | 1.877 | 0.002  | 0.020 |
| GO_REGULATION_OF_SODIUM_ION_TR   |     |       |       |        |       |
| ANSMEMBRANE_TRANSPORTER_ACTI     |     |       |       |        |       |
| VITY                             | 37  | 0.521 | 1.877 | 0.002  | 0.020 |
| GO_REGULATION_OF_TRANSMEMBRA     |     |       |       |        |       |
| NE_TRANSPORT                     | 408 | 0.420 | 1.877 | <0.001 | 0.020 |
| GO_REGULATION_OF_RELEASE_OF_SE   |     |       |       |        |       |
| QUESTERED_CALCIIUM_ION_INTO_CY   |     |       |       |        |       |
| TOSOL_BY_SARCOPLASMIC_RETICUL    |     |       |       |        |       |
| UM                               | 25  | 0.709 | 1.876 | 0.004  | 0.020 |
| GO_POSITIVE_REGULATION_OF_LIPID_ |     |       |       |        |       |
| KINASE_ACTIVITY                  | 32  | 0.569 | 1.875 | 0.002  | 0.021 |
| GO_CYCLIC_NUCLEOTIDE_CATABOLIC   |     |       |       |        |       |
| _PROCESS                         | 17  | 0.708 | 1.875 | <0.001 | 0.021 |
| GO_NEGATIVE_REGULATION_OF_INFL   |     |       |       |        |       |
| AMMATORY_RESPONSE                | 91  | 0.517 | 1.875 | <0.001 | 0.020 |
| GO_POSITIVE_REGULATION_OF_VASO   | 35  | 0.624 | 1.874 | 0.002  | 0.020 |

---

|                                  |     |       |       |        |       |
|----------------------------------|-----|-------|-------|--------|-------|
| CONstriction                     |     |       |       |        |       |
| GO_ACTIN_FILAMENT_BASED_MOVE     | 91  | 0.489 | 1.873 | 0.004  | 0.021 |
| MENT                             |     |       |       |        |       |
| GO_REGULATION_OF_SMOOTH_MUSC     | 49  | 0.579 | 1.873 | 0.008  | 0.021 |
| LE_CELL_MIGRATION                | 123 | 0.464 | 1.873 | 0.002  | 0.021 |
| GO_CELL_RECOGNITION              | 31  | 0.616 | 1.872 | <0.001 | 0.021 |
| GO_HETEROTRIMERIC_G_PROTEIN_CO   | 57  | 0.565 | 1.871 | 0.004  | 0.021 |
| MPLEX                            |     |       |       |        |       |
| GO_PROTEOGLYCAN_BIOSYNTHETIC_    | 26  | 0.637 | 1.871 | 0.004  | 0.021 |
| PROCESS                          |     |       |       |        |       |
| GO_EXCITATORY_POSTSYNAPTIC_POT   | 16  | 0.776 | 1.871 | <0.001 | 0.021 |
| ENTIAL                           |     |       |       |        |       |
| GO_NEURON_CELL_CELL_ADHESION     | 35  | 0.590 | 1.869 | 0.002  | 0.021 |
| GO_GLIAL_CELL_MIGRATION          | 139 | 0.476 | 1.869 | <0.001 | 0.021 |
| GO_PLATELET_ACTIVATION           | 30  | 0.588 | 1.869 | <0.001 | 0.021 |
| GO_NEGATIVE_REGULATION_OF_LEU    | 26  | 0.559 | 1.866 | 0.002  | 0.022 |
| KOCYTE_MIGRATION                 |     |       |       |        |       |
| GO_REGULATION_OF_CELL_FATE_CO    | 26  | 0.604 | 1.866 | 0.008  | 0.022 |
| MMITMENT                         |     |       |       |        |       |
| GO_REGULATION_OF_ENDOTHELIAL_    | 193 | 0.490 | 1.865 | <0.001 | 0.022 |
| CELL_DIFFERENTIATION             |     |       |       |        |       |
| GO_CELL_CELL_ADHESION_VIA_PLAS   | 482 | 0.496 | 1.864 | 0.008  | 0.022 |
| MA_MEMBRANE_ADHESION_MOLECU      | 21  | 0.665 | 1.864 | 0.008  | 0.022 |
| LES                              |     |       |       |        |       |
| GO_G_PROTEIN_COUPLED_RECEPTOR    | 26  | 0.611 | 1.863 | 0.006  | 0.022 |
| _ACTIVITY                        |     |       |       |        |       |
| GO_GLYCOPROTEIN_COMPLEX          | 434 | 0.444 | 1.862 | <0.001 | 0.022 |
| GO_POSITIVE_REGULATION_OF_CARTI  | 147 | 0.493 | 1.862 | <0.001 | 0.022 |
| LAGE_DEVELOPMENT                 |     |       |       |        |       |
| GO_SINGLE_ORGANISM_CELL_ADHESI   | 325 | 0.422 | 1.862 | <0.001 | 0.022 |
| ON                               |     |       |       |        |       |
| GO_NEGATIVE_REGULATION_OF_RESP   | 201 | 0.427 | 1.862 | <0.001 | 0.022 |
| ONSE_TO_WOUNDING                 |     |       |       |        |       |
| GO_REGULATION_OF_CELL_MORPHOG    | 24  | 0.611 | 1.862 | 0.010  | 0.022 |
| ENESIS_INVOLVED_IN_DIFFERENTIATI |     |       |       |        |       |
| ON                               | 19  | 0.643 | 1.861 | 0.004  | 0.022 |
| GO_POSITIVE_REGULATION_OF_MAP_   | 366 | 0.428 | 1.860 | <0.001 | 0.022 |
| KINASE_ACTIVITY                  |     |       |       |        |       |
| GO_INTRINSIC_COMPONENT_OF_EXTE   |     |       |       |        |       |
| RNAL_SIDE_OF_PLASMA_MEMBRANE     |     |       |       |        |       |
| GO_NEGATIVE_REGULATION_OF_CAL    |     |       |       |        |       |
| CIUM_ION_TRANSPORT_INTO_CYTOSO   |     |       |       |        |       |
| L                                |     |       |       |        |       |
| GO_POSTSYNAPSE                   |     |       |       |        |       |

|                                                                                                    |     |       |       |        |       |
|----------------------------------------------------------------------------------------------------|-----|-------|-------|--------|-------|
| GO_REGULATION_OF_DOPAMINE_SECRETION                                                                | 21  | 0.658 | 1.859 | <0.001 | 0.023 |
| GO_RENAL_TUBULE_DEVELOPMENT                                                                        | 78  | 0.495 | 1.859 | 0.006  | 0.023 |
| GO_VASOCONSTRICTION                                                                                | 28  | 0.603 | 1.859 | <0.001 | 0.023 |
| GO_CILIARY_MEMBRANE                                                                                | 73  | 0.490 | 1.858 | <0.001 | 0.023 |
| GO_NEURAL_CREAST_CELL_MIGRATION                                                                    | 50  | 0.551 | 1.857 | 0.002  | 0.023 |
| GO_DENDRITIC_SHAFT                                                                                 | 36  | 0.574 | 1.857 | 0.004  | 0.023 |
| GO_REGULATION_OF_EPITHELIAL_TO_MESENCHYMAL_TRANSITION                                              | 64  | 0.497 | 1.857 | 0.002  | 0.023 |
| GO_METANEPHROS_DEVELOPMENT                                                                         | 81  | 0.499 | 1.856 | <0.001 | 0.023 |
| GO_REGULATION_OF_EPITHELIAL_CELL_PROLIFERATION                                                     | 275 | 0.421 | 1.856 | <0.001 | 0.023 |
| GO_RESPIRATORY_SYSTEM_DEVELOPMENT                                                                  | 194 | 0.430 | 1.855 | <0.001 | 0.023 |
| GO_POSITIVE_REGULATION_OF_TRANSMEMBRANE_RECEPTOR_PROTEIN_SERINE_THREONINE_KINASE_SIGNALING_PATHWAY | 95  | 0.472 | 1.855 | <0.001 | 0.023 |
| GO_SPROUTING_ANGIOGENESIS                                                                          | 43  | 0.594 | 1.855 | 0.008  | 0.023 |
| GO TRABECULA FORMATION                                                                             | 22  | 0.634 | 1.854 | 0.006  | 0.023 |
| GO_ACTIN_FILAMENT_BUNDLE                                                                           | 50  | 0.569 | 1.854 | 0.010  | 0.023 |
| GO_POTASSIUM_CHANNEL_ACTIVITY                                                                      | 116 | 0.499 | 1.854 | 0.002  | 0.023 |
| GO_POSITIVE_REGULATION_OF_SYNAPTIC_TRANSMISSION_Glutamatergic                                      | 17  | 0.718 | 1.853 | 0.004  | 0.023 |
| GO_POSITIVE_REGULATION_OF_ERK1_AND_ERK2_CASCADE                                                    | 161 | 0.475 | 1.853 | <0.001 | 0.023 |
| GO_HORMONE_BINDING                                                                                 | 63  | 0.506 | 1.852 | 0.002  | 0.023 |
| GO_NEGATIVE_REGULATION_OF_STAT_CASCADE                                                             | 44  | 0.523 | 1.851 | 0.002  | 0.024 |
| GO_REGULATION_OF_TRANSPORTER_ACTIVITY                                                              | 188 | 0.425 | 1.851 | <0.001 | 0.024 |
| GO_PROTEIN_KINASE_C_ACTIVATING_G_PROTEIN_COUPLED_RECEPTOR_SIGNALING_PATHWAY                        | 31  | 0.576 | 1.851 | 0.002  | 0.023 |
| GO_REGULATION_OF_CARDIAC_MUSCLE_CONTRACTION                                                        | 65  | 0.488 | 1.850 | 0.004  | 0.024 |
| GO_PIGMENT_CELL_DIFFERENTIATION                                                                    | 25  | 0.559 | 1.850 | <0.001 | 0.024 |
| GO_PROTEOGLYCAN_BINDING                                                                            | 28  | 0.611 | 1.850 | <0.001 | 0.024 |
| GO_STRUCTURAL_CONSTITUENT_OF_MUSCLE                                                                | 41  | 0.605 | 1.850 | 0.010  | 0.024 |
| GO_RESPONSE_TO_TRANSFORMING_G                                                                      | 142 | 0.454 | 1.848 | <0.001 | 0.024 |

|                                                                                |     |       |       |        |       |
|--------------------------------------------------------------------------------|-----|-------|-------|--------|-------|
| ROWTH_FACTOR_BETA                                                              |     |       |       |        |       |
| GO_CELL_GROWTH                                                                 | 130 | 0.458 | 1.848 | <0.001 | 0.024 |
| GO_FIBROBLAST_GROWTH_FACTOR_RECEPTOR_BINDING                                   | 28  | 0.620 | 1.848 | <0.001 | 0.024 |
| GO_CENTRAL_NERVOUS_SYSTEM_NEURON_DEVELOPMENT                                   | 70  | 0.511 | 1.847 | <0.001 | 0.024 |
| GO_REGULATION_OF_STRIATED_MUSCLE_CONTRACTION                                   | 77  | 0.480 | 1.847 | <0.001 | 0.024 |
| GO_NEGATIVE_REGULATION_OF_CALCIUM_ION_TRANSMEMBRANE_TRANSPORT                  | 28  | 0.578 | 1.847 | 0.004  | 0.024 |
| GO_CHEMOREPELLENT_ACTIVITY                                                     | 27  | 0.584 | 1.847 | 0.002  | 0.024 |
| GO_EXTRACELLULAR_MATRIX_BINDING                                                | 48  | 0.582 | 1.846 | 0.008  | 0.024 |
| GO_POSITIVE_REGULATION_OF_CATION_CHANNEL_ACTIVITY                              | 36  | 0.529 | 1.846 | 0.008  | 0.024 |
| GO_ACTOMYOSIN                                                                  | 57  | 0.569 | 1.845 | 0.004  | 0.024 |
| GO_POSITIVE_REGULATION_OF_EPITHELIAL_CELL_PROLIFERATION                        | 148 | 0.467 | 1.845 | <0.001 | 0.024 |
| GO_POSITIVE_REGULATION_OF_BLOOD_CIRCULATION                                    | 90  | 0.491 | 1.845 | <0.001 | 0.024 |
| GO_ADENYLATE_CYCLASE_INHIBITING_G_G_PROTEIN_COUPLED_RECEPTOR_SIGNALING_PATHWAY | 67  | 0.544 | 1.845 | <0.001 | 0.024 |
| GO_NEGATIVE_REGULATION_OF_CHONDROCYTE_DIFFERENTIATION                          | 17  | 0.697 | 1.845 | 0.004  | 0.024 |
| GO_NEGATIVE_REGULATION_OF_SMALL_GTPASE_MEDIATED_SIGNAL_TRANSDUCTION            | 40  | 0.547 | 1.844 | <0.001 | 0.024 |
| GO_AXONAL_FASCICULATION                                                        | 20  | 0.678 | 1.841 | 0.002  | 0.025 |
| GO_3_5_CYCLIC_AMP_PHOSPHODIESTERASE_ACTIVITY                                   | 15  | 0.735 | 1.840 | <0.001 | 0.025 |
| GO_REGULATION_OF_PHOSPHOLIPID_METABOLIC_PROCESS                                | 58  | 0.475 | 1.840 | 0.004  | 0.025 |
| GO_POSTSYNAPTIC_MEMBRANE_ORGANIZATION                                          | 25  | 0.620 | 1.840 | 0.004  | 0.025 |
| GO_UROGENITAL_SYSTEM_DEVELOPMENT                                               | 296 | 0.422 | 1.840 | <0.001 | 0.025 |
| GO_REGULATION_OF_MACROPHAGE_DERIVED_FOAM_CELL_DIFFERENTIATION                  | 28  | 0.607 | 1.838 | 0.008  | 0.025 |
| GO_RETINA_VASCULATURE_DEVELOPMENT_IN_CAMERA_TYPE_EYE                           | 16  | 0.801 | 1.838 | 0.004  | 0.025 |
| GO_AMINOGLYCAN_BIOSYNTHETIC_PATHWAY                                            | 104 | 0.506 | 1.838 | 0.004  | 0.025 |

| ROCESS                                                                    |     |       |       |        |       |
|---------------------------------------------------------------------------|-----|-------|-------|--------|-------|
| GO_MYOFIBRIL_ASSEMBLY                                                     | 45  | 0.592 | 1.838 | 0.009  | 0.025 |
| GO_CARDIAC_MUSCLE_CELL_ACTION_POTENTIAL                                   | 36  | 0.587 | 1.837 | 0.012  | 0.025 |
| GO_NEGATIVE_REGULATION_OF_CELL_DEVELOPMENT                                | 290 | 0.413 | 1.837 | <0.001 | 0.025 |
| GO_POSITIVE_REGULATION_OF_PATHWAY_RESTRICTED_SMAD_PROTEIN_PHOSPHORYLATION | 44  | 0.547 | 1.836 | 0.002  | 0.025 |
| GO_POSITIVE_REGULATION_OF_CELL_MATRIX_ADHESION                            | 40  | 0.517 | 1.836 | <0.001 | 0.025 |
| GO_MODULATION_OF_SYNAPTIC_TRANSMISSION                                    | 291 | 0.444 | 1.836 | 0.002  | 0.025 |
| GO_ACTIN_MEDIATED_CELL_CONTRACTION                                        | 72  | 0.515 | 1.835 | 0.002  | 0.025 |
| GO_SUBSTRATE_ADHESION_DEPENDENT_CELL_SPREADING                            | 38  | 0.572 | 1.835 | 0.008  | 0.025 |
| GO_NEGATIVE_REGULATION_OF_SMOOTHENED_SIGNALING_PATHWAY                    | 25  | 0.608 | 1.835 | 0.002  | 0.025 |
| GO_NEURON_PROJECTION_GUIDANCE                                             | 199 | 0.457 | 1.835 | 0.002  | 0.025 |
| GO_BASAL_PLASMA_MEMBRANE                                                  | 31  | 0.545 | 1.834 | 0.010  | 0.025 |
| GO_CATION_CHANNEL_ACTIVITY                                                | 285 | 0.468 | 1.834 | 0.002  | 0.025 |
| GO_CORECEPTOR_ACTIVITY                                                    | 35  | 0.650 | 1.833 | 0.008  | 0.026 |
| GO_REGULATION_OF_ENDOTHELIAL_CELL_APOPTOTIC_PROCESS                       | 39  | 0.577 | 1.832 | 0.004  | 0.026 |
| GO_NEGATIVE_REGULATION_OF_SMOOTH_MUSCLE_CELL_MIGRATION                    | 16  | 0.681 | 1.831 | 0.008  | 0.026 |
| GO_WNT_PROTEIN_BINDING                                                    | 29  | 0.632 | 1.831 | <0.001 | 0.026 |
| GO_TUBE_MORPHOGENESIS                                                     | 320 | 0.406 | 1.830 | <0.001 | 0.026 |
| GO_RESPONSE_TO_AXON_INJURY                                                | 46  | 0.519 | 1.826 | 0.008  | 0.027 |
| GO_SYNAPTIC_MEMBRANE                                                      | 251 | 0.445 | 1.826 | 0.002  | 0.027 |
| GO_REGULATION_OF_MEMBRANE_REPOLARIZATION                                  | 29  | 0.574 | 1.825 | 0.006  | 0.027 |
| GO_RESPONSE_TO_PROGESTERONE                                               | 48  | 0.511 | 1.825 | 0.004  | 0.028 |
| GO_ACTIVATION_OF_MAPKK_ACTIVITY                                           | 48  | 0.508 | 1.824 | <0.001 | 0.028 |
| GO_REGULATION_OF_BLOOD_VESSEL_ENDOTHELIAL_CELL_MIGRATION                  | 49  | 0.531 | 1.824 | 0.006  | 0.028 |
| GO_NEGATIVE_REGULATION_OF_MUSCLE_TISSUE_DEVELOPMENT                       | 35  | 0.548 | 1.824 | 0.002  | 0.028 |
| GO_POSTSYNAPTIC_MEMBRANE                                                  | 199 | 0.448 | 1.823 | 0.002  | 0.028 |
| GO_REGULATION_OF_TISSUE_REMODELING                                        | 59  | 0.484 | 1.822 | <0.001 | 0.028 |
| GO_PLASMA_MEMBRANE_RAFT                                                   | 83  | 0.483 | 1.822 | 0.002  | 0.028 |

|                                                                            |     |       |       |        |       |
|----------------------------------------------------------------------------|-----|-------|-------|--------|-------|
| GO_CARDIAC_VENTRICLE_MORPHOGENESIS                                         | 60  | 0.477 | 1.822 | 0.002  | 0.028 |
| GO_REGULATION_OF_STAT_CASCADE                                              | 129 | 0.442 | 1.820 | <0.001 | 0.028 |
| GO_METALLOCARBOXYPEPTIDASE_ACTIVITY                                        | 25  | 0.578 | 1.819 | 0.004  | 0.029 |
| GO_SINGLE_ORGANISM_BEHAVIOR                                                | 373 | 0.423 | 1.819 | <0.001 | 0.029 |
| GO_CELL_SURFACE_RECEPTOR_SIGNALING_PATHWAY_INVOLVED_IN_CELL_CELL_SIGNALING | 70  | 0.489 | 1.818 | <0.001 | 0.029 |
| GO_CHONDROCYTE_DIFFERENTIATION                                             | 59  | 0.520 | 1.815 | 0.006  | 0.030 |
| GO_INOSITOL_LIPID_MEDIATED_SIGNALING                                       | 115 | 0.447 | 1.815 | <0.001 | 0.030 |
| GO_GROWTH_FACTOR_RECEPTOR_BINDING                                          | 126 | 0.432 | 1.814 | <0.001 | 0.030 |
| GO_TRANSFORMING_GROWTH_FACTOR_BETA_BINDING                                 | 16  | 0.827 | 1.814 | <0.001 | 0.030 |
| GO_RECEPTOR_INTERNALIZATION                                                | 46  | 0.540 | 1.813 | 0.006  | 0.030 |
| GO_AMINOGLYCAN_METABOLIC_PROCESS                                           | 162 | 0.452 | 1.812 | <0.001 | 0.030 |
| GO_RELAXATION_OF_MUSCLE                                                    | 20  | 0.607 | 1.812 | 0.010  | 0.030 |
| GO_VOLTAGE_GATED_POTASSIUM_CHANNEL_ACTIVITY                                | 85  | 0.506 | 1.811 | 0.002  | 0.030 |
| GO_CARDIAC_MUSCLE_CELL_CONTRACTION                                         | 28  | 0.608 | 1.810 | 0.004  | 0.031 |
| GO_BEHAVIOR                                                                | 496 | 0.409 | 1.809 | <0.001 | 0.031 |
| GO_SULFOTRANSFERASE_ACTIVITY                                               | 52  | 0.516 | 1.809 | 0.002  | 0.031 |
| GO_REGULATION_OF_BEHAVIOR                                                  | 61  | 0.529 | 1.809 | <0.001 | 0.031 |
| GO_SCAVENGER_RECEPTOR_ACTIVITY                                             | 39  | 0.548 | 1.808 | 0.008  | 0.031 |
| GO_NEGATIVE_REGULATION_OF_EMBRYONIC_DEVELOPMENT                            | 26  | 0.601 | 1.808 | 0.010  | 0.031 |
| GO_CHONDROITIN_SULFATE_PROTEOGLYCAN_BIOSYNTHETIC_PROCESS                   | 29  | 0.612 | 1.807 | 0.006  | 0.031 |
| GO_GLIOGENESIS                                                             | 168 | 0.440 | 1.806 | 0.002  | 0.031 |
| GO_POSITIVE_REGULATION_OF_PROTEIN_KINASE_B_SIGNALING                       | 78  | 0.464 | 1.806 | <0.001 | 0.031 |
| GO_REGULATION_OF_RESPONSE_TO_WOUNDING                                      | 398 | 0.430 | 1.806 | 0.004  | 0.031 |
| GO_REGULATION_OF_PROTEIN_MATURATION                                        | 78  | 0.464 | 1.805 | 0.002  | 0.031 |
| GO_PHAGOCYTOSIS_RECOGNITION                                                | 15  | 0.678 | 1.805 | 0.008  | 0.031 |
| GO_NEGATIVE_REGULATION_OF_INTRACELLULAR_STEROID_HORMONE_RE                 | 29  | 0.542 | 1.804 | 0.002  | 0.031 |

| CEPTOR_SIGNALING_PATHWAY                                                                 |     |       |       |        |       |
|------------------------------------------------------------------------------------------|-----|-------|-------|--------|-------|
| GO_REGULATION_OF_EXCRETION                                                               | 28  | 0.595 | 1.804 | 0.011  | 0.031 |
| GO_MULTICELLULAR_ORGANISMAL_RESPONSE_TO_STRESS                                           | 67  | 0.466 | 1.804 | 0.002  | 0.031 |
| GO_NEGATIVE_REGULATION_OF_ERK1_AND_ERK2_CASCADE                                          | 51  | 0.480 | 1.803 | <0.001 | 0.032 |
| GO_REGULATION_OF_N_METHYL_D_ASPARTATE_SELECTIVE_Glutamate_Receptor_Activity              | 15  | 0.674 | 1.803 | 0.006  | 0.032 |
| GO_DIVALENT_INORGANIC_CATION_TRANSPORT                                                   | 254 | 0.400 | 1.803 | 0.002  | 0.032 |
| GO_MUSCLE_HYPERTROPHY                                                                    | 28  | 0.585 | 1.802 | 0.008  | 0.032 |
| GO_ORGAN_FORMATION                                                                       | 34  | 0.533 | 1.802 | 0.010  | 0.032 |
| GO_METANEPHRIC_NEPHRON_DEVELOPMENT                                                       | 32  | 0.563 | 1.802 | 0.002  | 0.032 |
| GO_RECEPTOR_CLUSTERING                                                                   | 41  | 0.513 | 1.802 | 0.002  | 0.032 |
| GO_CARDIOCYTE_DIFFERENTIATION                                                            | 93  | 0.453 | 1.802 | <0.001 | 0.032 |
| GO_MESENCHYME_MORPHOGENESIS                                                              | 38  | 0.573 | 1.802 | 0.012  | 0.032 |
| GO_HISTONE_ACETYLTRANSFERASE_BINDING                                                     | 28  | 0.569 | 1.801 | 0.004  | 0.032 |
| GO_REGULATION_OF_SENSORY_PERCEPTION                                                      | 33  | 0.545 | 1.801 | 0.004  | 0.032 |
| GO_REGULATION_OF_ACUTE_INFLAMMATORY_RESPONSE                                             | 71  | 0.507 | 1.799 | 0.002  | 0.032 |
| GO_REGULATION_OF_AXONOGENESIS                                                            | 165 | 0.449 | 1.798 | <0.001 | 0.032 |
| GO_REGULATION_OF_CARDIAC_MUSCLE_CELL_MEMBRANE_REPOLARIZATION                             | 20  | 0.626 | 1.798 | 0.006  | 0.032 |
| GO_SENSORY_ORGAN_DEVELOPMENT                                                             | 478 | 0.393 | 1.797 | <0.001 | 0.033 |
| GO_CELL_DIFFERENTIATION_INVOLVED_IN_KIDNEY_DEVELOPMENT                                   | 35  | 0.541 | 1.797 | 0.006  | 0.033 |
| GO_REGULATION_OF_SODIUM_ION_TRANSMEMBRANE_TRANSPORT                                      | 47  | 0.491 | 1.796 | 0.002  | 0.033 |
| GO_LYSOSOMAL_LUMEN                                                                       | 86  | 0.522 | 1.795 | 0.004  | 0.033 |
| GO_DEVELOPMENTAL_GROWTH_INVOLVED_IN_MORPHOGENESIS                                        | 103 | 0.480 | 1.795 | 0.008  | 0.033 |
| GO_REGULATION_OF_HEART_RATE_BY_CARDIAC_CONDUCTION                                        | 29  | 0.568 | 1.795 | 0.010  | 0.033 |
| GO_REGULATION_OF_SMOOTH_MUSCLE_CELL_DIFFERENTIATION                                      | 19  | 0.640 | 1.794 | 0.004  | 0.033 |
| GO_EYE_DEVELOPMENT                                                                       | 316 | 0.406 | 1.794 | <0.001 | 0.033 |
| GO_REGULATION_OF_CARDIAC_MUSCLE_CONTRACTION_BY_REGULATION_OF_THE_RELEASE_OF_SEQUESTERED_ | 19  | 0.718 | 1.793 | 0.006  | 0.033 |

---

|                                 |     |       |       |        |       |
|---------------------------------|-----|-------|-------|--------|-------|
| CALCIUM_ION                     |     |       |       |        |       |
| GO_SH3_DOMAIN_BINDING           | 113 | 0.432 | 1.793 | 0.006  | 0.033 |
| GO_POSITIVE_REGULATION_OF_RESP  |     |       |       |        |       |
| ONSE_TO_EXTERNAL_STIMULUS       | 290 | 0.442 | 1.793 | 0.006  | 0.033 |
| GO_MUSCLE_CELL_DEVELOPMENT      | 119 | 0.466 | 1.792 | 0.006  | 0.033 |
| GO_PARTURITION                  | 20  | 0.606 | 1.792 | 0.006  | 0.033 |
| GO_NEGATIVE_REGULATION_OF_ION_  |     |       |       |        |       |
| TRANSPORT                       | 121 | 0.436 | 1.792 | <0.001 | 0.033 |
| GO_CELLULAR_RESPONSE_TO_ACID_   |     |       |       |        |       |
| CHEMICAL                        | 166 | 0.413 | 1.792 | 0.002  | 0.033 |
| GO_CARDIAC_SEPTUM_DEVELOPMEN    |     |       |       |        |       |
| T                               | 83  | 0.477 | 1.792 | <0.001 | 0.033 |
| GO_POSITIVE_REGULATION_OF_TYRO  |     |       |       |        |       |
| SINE_PHOSPHORYLATION_OF_STAT5_P |     |       |       |        |       |
| ROTEIN                          | 15  | 0.667 | 1.792 | 0.010  | 0.033 |
| GO_POSITIVE_REGULATION_OF_FAT_C |     |       |       |        |       |
| ELL_DIFFERENTIATION             | 44  | 0.524 | 1.791 | <0.001 | 0.033 |
| GO_REGULATION_OF_INFLAMMATORY   |     |       |       |        |       |
| _RESPONSE                       | 282 | 0.446 | 1.790 | 0.004  | 0.034 |
| GO_BLOOD_VESSEL_REMODELING      | 32  | 0.558 | 1.790 | 0.002  | 0.034 |
| GO_REGULATION_OF_NON_CANONICA   |     |       |       |        |       |
| L_WNT_SIGNALING_PATHWAY         | 19  | 0.614 | 1.787 | 0.008  | 0.034 |
| GO_NEGATIVE_REGULATION_OF_CAL   |     |       |       |        |       |
| CIUM_ION_TRANSPORT              | 48  | 0.483 | 1.787 | 0.004  | 0.034 |
| GO_GUANYL_NUCLEOTIDE_EXCHANG    |     |       |       |        |       |
| E_FACTOR_ACTIVITY               | 293 | 0.413 | 1.786 | 0.002  | 0.035 |
| GO_CELL_LEADING_EDGE            | 337 | 0.402 | 1.786 | <0.001 | 0.035 |
| GO_POSITIVE_REGULATION_OF_VASC  |     |       |       |        |       |
| ULAR_ENDOTHELIAL_GROWTH_FACT    |     |       |       |        |       |
| OR_RECEPTOR_SIGNALING_PATHWAY   | 16  | 0.644 | 1.786 | 0.006  | 0.035 |
| GO_REGULATION_OF_RESPIRATORY_S  |     |       |       |        |       |
| YSTEM_PROCESS                   | 15  | 0.712 | 1.785 | 0.009  | 0.034 |
| GO_EXTERNAL_SIDE_OF_PLASMA_ME   |     |       |       |        |       |
| MBRANE                          | 207 | 0.490 | 1.785 | 0.010  | 0.035 |
| GO_CELLULAR_RESPONSE_TO_GLUCA   |     |       |       |        |       |
| GON_STIMULUS                    | 38  | 0.561 | 1.785 | 0.008  | 0.035 |
| GO_EPITHELIAL_CELL_MORPHOGENE   |     |       |       |        |       |
| SIS                             | 42  | 0.506 | 1.785 | 0.004  | 0.035 |
| GO_NEGATIVE_REGULATION_OF_AMI   |     |       |       |        |       |
| NE_TRANSPORT                    | 25  | 0.607 | 1.785 | 0.006  | 0.034 |
| GO_RESPONSE_TO_OXYGEN_LEVELS    | 302 | 0.385 | 1.784 | <0.001 | 0.035 |
| GO_ACTIN_FILAMENT_BASED_PROCE   |     |       |       |        |       |
| SS                              | 430 | 0.391 | 1.784 | 0.002  | 0.035 |
| GO_REGULATION_OF_PROTEIN_KINAS  | 115 | 0.418 | 1.783 | 0.002  | 0.035 |



| E_B_SIGNALING                                                                  |     |       |       |        |       |
|--------------------------------------------------------------------------------|-----|-------|-------|--------|-------|
| GO_GLIAL_CELL_DEVELOPMENT                                                      | 73  | 0.463 | 1.783 | 0.002  | 0.035 |
| GO_CARDIAC_MUSCLE_TISSUE_DEVELOPMENT                                           | 136 | 0.429 | 1.781 | <0.001 | 0.035 |
| GO_TRANSMEMBRANE_RECEPTOR_PROTEIN_SERINE_THREONINE_KINASE_ACTIVITY             | 17  | 0.677 | 1.781 | 0.012  | 0.035 |
| GO_REGULATION_OF_POSITIVE_CHEMOTAXIS                                           | 22  | 0.608 | 1.781 | 0.004  | 0.035 |
| GO_AORTA_DEVELOPMENT                                                           | 41  | 0.536 | 1.781 | 0.004  | 0.035 |
| GO_POSITIVE_REGULATION_OF_ENDOCYTOSIS                                          | 114 | 0.444 | 1.781 | 0.004  | 0.035 |
| GO_CARDIAC_VENTRICLE_DEVELOPMENT                                               | 103 | 0.431 | 1.781 | <0.001 | 0.035 |
| GO_REGULATION_OF_EXTENT_OF_CELL_GROWTH                                         | 99  | 0.465 | 1.780 | 0.006  | 0.035 |
| GO_REGULATION_OF_ORGAN_FORMATION                                               | 32  | 0.539 | 1.780 | 0.002  | 0.035 |
| GO_GLYCOLIPID_BINDING                                                          | 18  | 0.572 | 1.779 | 0.004  | 0.036 |
| GO_POSITIVE_REGULATION_OF_SMOOTH_MUSCLE_CONTRACTION                            | 29  | 0.545 | 1.779 | 0.004  | 0.036 |
| GO_TRANSFORMING_GROWTH_FACTOR_BETA_RECEPTOR_BINDING                            | 46  | 0.507 | 1.779 | 0.008  | 0.036 |
| GO_REGULATION_OF_SYSTEMIC_ARTERIAL_BLOOD_PRESSURE_BY_HORMONE                   | 35  | 0.563 | 1.778 | 0.006  | 0.036 |
| GO_NEGATIVE_REGULATION_OF_G_PROTEIN_COUPLED_RECEPTOR_PROTEIN_SIGNALING_PATHWAY | 38  | 0.522 | 1.778 | 0.006  | 0.036 |
| GO_REGULATION_OF_SMALL_GTPASE_MEDIATED_SIGNAL_TRANSDUCTION                     | 273 | 0.420 | 1.778 | 0.002  | 0.036 |
| GO_RESPONSE_TO_GROWTH_FACTOR                                                   | 461 | 0.385 | 1.776 | <0.001 | 0.036 |
| GO_REGULATION_OF_GASTRULATION                                                  | 32  | 0.553 | 1.776 | 0.010  | 0.036 |
| GO_CELL_PROJECTION_MEMBRANE                                                    | 285 | 0.373 | 1.776 | <0.001 | 0.036 |
| GO_NEGATIVE_REGULATION_OF_NERVOUS_SYSTEM_DEVELOPMENT                           | 255 | 0.411 | 1.775 | <0.001 | 0.036 |
| GO_BETA_AMYLOID_BINDING                                                        | 33  | 0.519 | 1.775 | 0.002  | 0.036 |
| GO_REGULATION_OF_SODIUM_ION_TRANSPORT                                          | 76  | 0.455 | 1.775 | 0.002  | 0.036 |
| GO_BONE_CELL_DEVELOPMENT                                                       | 21  | 0.608 | 1.775 | 0.014  | 0.036 |
| GO_DEVELOPMENTAL_PIGMENTATION                                                  | 36  | 0.509 | 1.775 | 0.002  | 0.036 |
| GO_CARDIAC_RIGHT_VENTRICLE_MORPHOGENESIS                                       | 16  | 0.641 | 1.772 | 0.008  | 0.037 |
| GO_REGULATION_OF_FAT_CELL_DIFFERENTIATION                                      | 98  | 0.446 | 1.772 | 0.002  | 0.037 |

---

|                                                                     |     |       |       |        |       |
|---------------------------------------------------------------------|-----|-------|-------|--------|-------|
| RENTIATION                                                          |     |       |       |        |       |
| GO_KERATAN_SULFATE_BIOSYNTHE<br>TIC_PROCESS                         | 27  | 0.556 | 1.772 | 0.013  | 0.037 |
| GO_NEGATIVE_REGULATION_OF_CELL<br>_GROWTH                           | 163 | 0.408 | 1.772 | 0.002  | 0.037 |
| GO_VOLTAGE_GATED_CATION_CHANN<br>EL_ACTIVITY                        | 130 | 0.483 | 1.772 | 0.004  | 0.037 |
| GO_HEART_GROWTH                                                     | 23  | 0.610 | 1.772 | 0.004  | 0.037 |
| GO_PEPTIDE_HORMONE_BINDING                                          | 36  | 0.577 | 1.771 | 0.011  | 0.037 |
| GO_PASSIVE_TRANSMEMBRANE_TRA<br>NSPORTER_ACTIVITY                   | 448 | 0.409 | 1.771 | 0.002  | 0.037 |
| GO_NEURONAL_ACTION_POTENTIAL                                        | 27  | 0.575 | 1.770 | 0.006  | 0.037 |
| GO_REFLEX                                                           | 20  | 0.618 | 1.770 | 0.008  | 0.037 |
| GO_REGULATION_OF_PEPTIDYL_TYRO<br>SINE_PHOSPHORYLATION              | 204 | 0.408 | 1.770 | 0.002  | 0.037 |
| GO_COMPLEX_OF_COLLAGEN_TRIME<br>RS                                  | 23  | 0.771 | 1.769 | 0.012  | 0.037 |
| GO_E_BOX_BINDING                                                    | 30  | 0.540 | 1.768 | 0.008  | 0.037 |
| GO_REGULATION_OF_MYOBLAST_FUS<br>ION                                | 18  | 0.634 | 1.768 | 0.012  | 0.038 |
| GO_REGULATION_OF_RECEPTOR_INTE<br>RNALIZATION                       | 37  | 0.488 | 1.767 | 0.004  | 0.038 |
| GO_REGULATION_OF_MULTICELLULA<br>R_ORGANISMAL_METABOLIC_PROCES<br>S | 35  | 0.532 | 1.767 | 0.014  | 0.038 |
| GO_CELL_CELL_JUNCTION                                               | 365 | 0.375 | 1.766 | 0.002  | 0.038 |
| GO_EXTRACELLULAR_Glutamate_G<br>ATED_ION_CHANNEL_ACTIVITY           | 20  | 0.627 | 1.765 | 0.002  | 0.038 |
| GO_EXCITATORY_SYNAPSE                                               | 191 | 0.429 | 1.765 | 0.002  | 0.038 |
| GO_CYTOKINE_RECEPTOR_ACTIVITY                                       | 85  | 0.555 | 1.764 | 0.012  | 0.039 |
| GO_POSITIVE_REGULATION_OF_CELL_<br>ADHESION                         | 360 | 0.430 | 1.763 | 0.006  | 0.039 |
| GO_A_BAND                                                           | 32  | 0.550 | 1.763 | 0.017  | 0.039 |
| GO_NEURON_PROJECTION_REGENERA<br>TION                               | 31  | 0.562 | 1.762 | 0.010  | 0.039 |
| GO_REGULATION_OF_CELL_SHAPE                                         | 135 | 0.441 | 1.761 | 0.002  | 0.039 |
| GO_TRANSPORTER_COMPLEX                                              | 310 | 0.419 | 1.761 | 0.002  | 0.039 |
| GO_INOSITOL_PHOSPHATE_MEDIATED<br>_SIGNALING                        | 17  | 0.625 | 1.761 | 0.014  | 0.039 |
| GO_POSITIVE_REGULATION_OF_TRAN<br>SPORTER_ACTIVITY                  | 72  | 0.440 | 1.761 | 0.002  | 0.039 |
| GO_ANCHORED_COMPONENT_OF_PLA<br>SMA_MEMBRANE                        | 39  | 0.509 | 1.761 | <0.001 | 0.039 |
| GO_ENDOCARDIAL_CUSHION_DEVEL                                        | 32  | 0.566 | 1.761 | 0.018  | 0.039 |

---

|                                                                                                 |     |       |       |        |       |
|-------------------------------------------------------------------------------------------------|-----|-------|-------|--------|-------|
| OPMENT                                                                                          |     |       |       |        |       |
| GO_MEMORY                                                                                       | 95  | 0.449 | 1.760 | 0.002  | 0.039 |
| GO_PERIKARYON                                                                                   | 99  | 0.471 | 1.759 | <0.001 | 0.039 |
| GO_EYE_MORPHOGENESIS                                                                            | 131 | 0.422 | 1.758 | <0.001 | 0.040 |
| GO_AXIS_ELONGATION                                                                              | 27  | 0.568 | 1.758 | 0.008  | 0.040 |
| GO_OSSIFICATION                                                                                 | 245 | 0.403 | 1.758 | <0.001 | 0.040 |
| GO_BASAL_LAMINA                                                                                 | 21  | 0.636 | 1.758 | 0.016  | 0.040 |
| GO_ALPHA_ACTININ_BINDING                                                                        | 21  | 0.630 | 1.758 | 0.009  | 0.040 |
| GO_MORPHOGENESIS_OF_A_BRANCHI<br>NG_STRUCTURE                                                   | 165 | 0.440 | 1.757 | 0.002  | 0.040 |
| GO_POTASSIUM_ION_TRANSPORT                                                                      | 149 | 0.452 | 1.756 | 0.004  | 0.040 |
| GO_RESPONSE_TO_ACID_CHEMICAL                                                                    | 308 | 0.366 | 1.756 | <0.001 | 0.040 |
| GO_REGULATION_OF_CELLULAR_EXT<br>RAVASATION                                                     | 22  | 0.609 | 1.756 | 0.015  | 0.040 |
| GO_REGULATION_OF_MUSCLE_CELL_<br>DIFFERENTIATION                                                | 145 | 0.414 | 1.755 | 0.002  | 0.040 |
| GO_LYMPH_VESSEL_DEVELOPMENT                                                                     | 20  | 0.647 | 1.754 | 0.008  | 0.041 |
| GO_RAS_GUANYL_NUCLEOTIDE_EXC<br>HANGE_FACTOR_ACTIVITY                                           | 222 | 0.420 | 1.754 | 0.006  | 0.041 |
| GO_REGULATION_OF_AXON_GUIDANC<br>E                                                              | 39  | 0.550 | 1.753 | 0.008  | 0.041 |
| GO_CORONARY_VASCULATURE_DEVE<br>LOPMENT                                                         | 36  | 0.553 | 1.753 | 0.010  | 0.041 |
| GO_POSITIVE_REGULATION_OF_AMIN<br>E_TRANSPORT                                                   | 31  | 0.561 | 1.753 | 0.004  | 0.041 |
| GO_CELLULAR_RESPONSE_TO_VITAMI<br>N                                                             | 26  | 0.564 | 1.753 | 0.015  | 0.041 |
| GO_NEGATIVE_REGULATION_OF_CELL<br>_SUBSTRATE_ADHESION                                           | 50  | 0.485 | 1.752 | 0.006  | 0.041 |
| GO_GANGLIOSIDE_METABOLIC_PRO<br>CESS                                                            | 26  | 0.537 | 1.752 | 0.004  | 0.041 |
| GO_REGULATION_OF_FATTY_ACID_OX<br>IDATION                                                       | 27  | 0.559 | 1.752 | 0.006  | 0.041 |
| GO_PEPTIDYL_TYROSINE_MODIFICATI<br>ON                                                           | 184 | 0.391 | 1.751 | <0.001 | 0.041 |
| GO_NEGATIVE_REGULATION_OF_SYN<br>APTIC_TRANSMISSION                                             | 59  | 0.489 | 1.751 | 0.006  | 0.041 |
| GO_POSITIVE_REGULATION_OF_AXON<br>_EXTENSION                                                    | 35  | 0.554 | 1.751 | 0.016  | 0.041 |
| GO_POSITIVE_REGULATION_OF_CELL<br>ULAR_RESPONSE_TO_TRANSFORMING<br>_GROWTH_FACTOR_BETA_STIMULUS | 24  | 0.528 | 1.751 | 0.006  | 0.041 |
| GO_NEURONAL_CELL_BODY_MEMBR<br>ANE                                                              | 20  | 0.638 | 1.751 | 0.008  | 0.041 |

|                                                                       |     |       |       |       |       |
|-----------------------------------------------------------------------|-----|-------|-------|-------|-------|
| GO_IONOTROPIC_Glutamate_Receptor_Signaling_Pathway                    | 24  | 0.580 | 1.751 | 0.006 | 0.041 |
| GO_Regulation_of_Sprouting_Angiogenesis                               | 28  | 0.540 | 1.751 | 0.008 | 0.041 |
| GO_Innervation                                                        | 23  | 0.589 | 1.750 | 0.011 | 0.041 |
| GO_Negative_Regulation_of_Intercellular_Kinase_Production             | 33  | 0.580 | 1.749 | 0.006 | 0.041 |
| GO_Regulation_of_Potassium_Ion_Transport                              | 81  | 0.467 | 1.749 | 0.008 | 0.041 |
| GO_Dermatan_Sulfate_Proteoglycan_Metabolic_Process                    | 16  | 0.680 | 1.748 | 0.012 | 0.042 |
| GO_Axon_Regeneration                                                  | 22  | 0.602 | 1.747 | 0.012 | 0.042 |
| GO_Anatomical_Structure_Maturation                                    | 39  | 0.525 | 1.747 | 0.008 | 0.042 |
| GO_Regulation_of_Endothelial_Cell_Chemotaxis                          | 17  | 0.618 | 1.746 | 0.007 | 0.042 |
| GO_Regulation_of_Leukocyte_Migration                                  | 144 | 0.472 | 1.746 | 0.018 | 0.042 |
| GO_Regulation_of_Neurotransmitter_Transport                           | 58  | 0.515 | 1.745 | 0.010 | 0.042 |
| GO_Dendrite                                                           | 436 | 0.385 | 1.744 | 0.004 | 0.042 |
| GO_Gated_Channel_Activity                                             | 316 | 0.432 | 1.744 | 0.002 | 0.042 |
| GO_Polysaccharide_Binding                                             | 21  | 0.593 | 1.744 | 0.004 | 0.042 |
| GO_Synapse_Organization                                               | 143 | 0.473 | 1.743 | 0.008 | 0.042 |
| GO_Respiratory_Gaseous_Exchange                                       | 47  | 0.454 | 1.743 | 0.010 | 0.043 |
| GO_Regulation_of_G-Protein_Coupled_Receptor_Protein_Signaling_Pathway | 122 | 0.418 | 1.743 | 0.002 | 0.042 |
| GO_Actin_Binding                                                      | 378 | 0.389 | 1.743 | 0.004 | 0.043 |
| GO_Negative_Regulation_of_Neuron_Differentiation                      | 185 | 0.411 | 1.742 | 0.002 | 0.043 |
| GO_Developmental_Cell_Growth                                          | 75  | 0.479 | 1.741 | 0.008 | 0.043 |
| GO_Cyclic_Nucleotide_Binding                                          | 34  | 0.534 | 1.740 | 0.011 | 0.043 |
| GO_Regulation_of_Anatomical_Structure_Size                            | 452 | 0.371 | 1.740 | 0.002 | 0.043 |
| GO_Membrane_Biogenesis                                                | 30  | 0.542 | 1.740 | 0.021 | 0.043 |
| GO_Response_to_Muscle_Stretch                                         | 19  | 0.611 | 1.740 | 0.008 | 0.043 |
| GO_Neuromuscular_Process                                              | 94  | 0.434 | 1.739 | 0.002 | 0.043 |
| GO_CAMP_Biosynthetic_Process                                          | 17  | 0.668 | 1.739 | 0.016 | 0.043 |
| GO_Vesicle_Lumen                                                      | 101 | 0.517 | 1.739 | 0.010 | 0.043 |
| GO_Fucosylation                                                       | 21  | 0.560 | 1.738 | 0.020 | 0.043 |
| GO_Palate_Development                                                 | 85  | 0.470 | 1.738 | 0.004 | 0.044 |
| GO_Regulation_of_Ryanodine_Receptor_Activity                          | 26  | 0.596 | 1.738 | 0.016 | 0.044 |

---

|                                                                                                    |     |       |       |        |       |
|----------------------------------------------------------------------------------------------------|-----|-------|-------|--------|-------|
| NSITIVE_CALCIIUM_RELEASE_CHANNE<br>L_ACTIVITY                                                      |     |       |       |        |       |
| GO_ENDOCRINE_PROCESS                                                                               | 44  | 0.512 | 1.738 | 0.010  | 0.044 |
| GO_SYNAPTIC_SIGNALING                                                                              | 409 | 0.411 | 1.736 | 0.004  | 0.044 |
| GO_REGULATION_OF_PLATELET_ACTI<br>VATION                                                           | 30  | 0.559 | 1.735 | 0.014  | 0.044 |
| GO_CALCIIUM_ION_TRANSMEMBRANE<br>_TRANSPORTER_ACTIVITY                                             | 123 | 0.460 | 1.735 | 0.011  | 0.044 |
| GO_GLYCOPROTEIN_BINDING                                                                            | 98  | 0.446 | 1.735 | 0.004  | 0.044 |
| GO_COMPLEMENT_ACTIVATION                                                                           | 46  | 0.566 | 1.735 | 0.014  | 0.044 |
| GO_REGULATION_OF_RECEPTOR_ACTI<br>VITY                                                             | 115 | 0.411 | 1.735 | 0.002  | 0.044 |
| GO_REGULATION_OF_RENAL_SODIUM<br>_EXCRETION                                                        | 23  | 0.599 | 1.734 | 0.013  | 0.044 |
| GO_NEGATIVE_REGULATION_OF_ORG<br>ANIC_ACID_TRANSPORT                                               | 18  | 0.603 | 1.734 | 0.014  | 0.044 |
| GO_NEGATIVE_REGULATION_OF_EPIT<br>HELIAL_CELL_PROLIFERATION                                        | 110 | 0.408 | 1.734 | <0.001 | 0.044 |
| GO_STRIATED_MUSCLE_CONTRACTIO<br>N                                                                 | 95  | 0.427 | 1.734 | 0.008  | 0.044 |
| GO_REGULATION_OF_TYPE_2_IMMUN<br>E_RESPONSE                                                        | 23  | 0.608 | 1.734 | 0.016  | 0.044 |
| GO_NODE_OF_RANVIER                                                                                 | 15  | 0.620 | 1.733 | 0.008  | 0.044 |
| GO_HEART TRABECULA MORPHOGEN<br>ESIS                                                               | 24  | 0.553 | 1.733 | 0.014  | 0.045 |
| GO_POSITIVE_REGULATION_OF_CELL_<br>JUNCTION_ASSEMBLY                                               | 24  | 0.535 | 1.733 | 0.004  | 0.045 |
| GO_LAMELLIPODIUM                                                                                   | 166 | 0.419 | 1.732 | 0.010  | 0.045 |
| GO_COCHLEA_DEVELOPMENT                                                                             | 39  | 0.502 | 1.732 | 0.008  | 0.045 |
| GO_PROTEIN_TYROSINE_KINASE_ACT<br>IVITY                                                            | 174 | 0.389 | 1.732 | <0.001 | 0.045 |
| GO_LEADING_EDGE_MEMBRANE                                                                           | 129 | 0.402 | 1.732 | <0.001 | 0.045 |
| GO_NEGATIVE_REGULATION_OF_INTR<br>ACELLULAR_TRANSPORT                                              | 136 | 0.392 | 1.732 | 0.002  | 0.045 |
| GO_NEGATIVE_REGULATION_OF_NEU<br>RAL_PRECURSOR_CELL_PROLIFERATI<br>ON                              | 21  | 0.554 | 1.731 | 0.010  | 0.045 |
| GO_STRIATED_MUSCLE_CELL_DIFFER<br>ENTIATION                                                        | 163 | 0.432 | 1.731 | 0.007  | 0.045 |
| GO_NEGATIVE_REGULATION_OF_PEPT<br>IDYL_SERINE_PHOSPHORYLATION                                      | 21  | 0.546 | 1.731 | 0.006  | 0.045 |
| GO_TRANSCRIPTION_FACTOR_ACTIVI<br>TY_RNA_POLYMERASE_II_DISTAL_EN<br>HANCER_SEQUENCE_SPECIFIC_BINDI | 86  | 0.420 | 1.730 | 0.004  | 0.045 |

---

|                                                                          |     |       |       |        |       |
|--------------------------------------------------------------------------|-----|-------|-------|--------|-------|
| NG                                                                       |     |       |       |        |       |
| GO_POSITIVE_REGULATION_OF_CHONDROCYTE_DIFFERENTIATION                    | 19  | 0.583 | 1.730 | 0.014  | 0.045 |
| GO_MEGAKARYOCYTE_DEVELOPMENT                                             | 15  | 0.629 | 1.729 | 0.014  | 0.045 |
| GO_MORPHOGENESIS_OF_AN_EPITHELIUM                                        | 391 | 0.377 | 1.729 | <0.001 | 0.045 |
| GO_INTEGRIN_MEDIATED_SIGNALING_PATHWAY                                   | 80  | 0.500 | 1.728 | 0.012  | 0.046 |
| GO_POSITIVE_REGULATION_OF_EPITHELIAL_CELL_APOPTOTIC_PROCESS              | 21  | 0.553 | 1.728 | 0.010  | 0.046 |
| GO_REGULATION_OF_CARDIAC_MUSCLE_TISSUE_DEVELOPMENT                       | 47  | 0.483 | 1.727 | 0.010  | 0.046 |
| GO_POSITIVE_REGULATION_OF_CALCIUM_ION_TRANSMEMBRANE_TRANSPORTER_ACTIVITY | 30  | 0.534 | 1.727 | 0.016  | 0.046 |
| GO_CHONDROITIN_SULFATE_BIOSYNTHETIC_PROCESS                              | 25  | 0.615 | 1.727 | 0.019  | 0.046 |
| GO_LENS_DEVELOPMENT_IN_CAMERA_TYPE_EYE                                   | 63  | 0.456 | 1.725 | 0.009  | 0.046 |
| GO_NEGATIVE_REGULATION_OF_DEVELOPMENTAL_GROWTH                           | 83  | 0.429 | 1.725 | 0.008  | 0.046 |
| GO_CAMP_MEDIATED_SIGNALING                                               | 36  | 0.557 | 1.725 | 0.011  | 0.046 |
| GO_VACUOLAR_LUMEN                                                        | 110 | 0.477 | 1.724 | 0.011  | 0.047 |
| GO_AXON_EXTENSION                                                        | 36  | 0.584 | 1.723 | 0.023  | 0.047 |
| GO_MEMBRANE_ASSEMBLY                                                     | 25  | 0.560 | 1.723 | 0.029  | 0.047 |
| GO_REGULATION_OF_URINE_VOLUME                                            | 20  | 0.598 | 1.723 | 0.012  | 0.047 |
| GO_REGULATION_OF_EMBRYONIC_DEVELOPMENT                                   | 108 | 0.438 | 1.723 | 0.014  | 0.047 |
| GO_PHOSPHATIDYLINOSITOL_3_KINASE_ACTIVITY                                | 70  | 0.465 | 1.722 | 0.006  | 0.047 |
| GO_CARDIAC_SEPTUM_MORPHOGENESIS                                          | 48  | 0.501 | 1.721 | 0.010  | 0.047 |
| GO_CENTRAL_NERVOUS_SYSTEM_NEURON_DIFFERENTIATION                         | 165 | 0.431 | 1.720 | 0.004  | 0.048 |
| GO_REGULATION_OF GRANULOCYTE CHEMOTAXIS                                  | 37  | 0.561 | 1.719 | 0.014  | 0.048 |
| GO_REGULATION_OF DEVELOPMENTAL_GROWTH                                    | 281 | 0.386 | 1.719 | <0.001 | 0.048 |
| GO_FRIZZLED_BINDING                                                      | 36  | 0.517 | 1.719 | 0.012  | 0.048 |
| GO_NEGATIVE_REGULATION_OF_GROWTH                                         | 229 | 0.378 | 1.717 | 0.002  | 0.048 |
| GO_NEGATIVE_REGULATION_OF BLOOD_VESSEL_ENDOTHELIAL_CELL_MIGRATION        | 22  | 0.579 | 1.717 | 0.014  | 0.048 |

| RATION                                                                                                          |     |       |       |        |       |
|-----------------------------------------------------------------------------------------------------------------|-----|-------|-------|--------|-------|
| GO_ION_CHANNEL_BINDING                                                                                          | 107 | 0.421 | 1.717 | 0.008  | 0.048 |
| GO_MYELOID_CELL_DEVELOPMENT                                                                                     | 40  | 0.475 | 1.717 | 0.011  | 0.048 |
| GO_PROTEIN_ACTIVATION_CASCADE                                                                                   | 67  | 0.549 | 1.716 | 0.010  | 0.049 |
| GO_NEGATIVE_REGULATION_OF_CATECHOLAMINE_SECRETION                                                               | 16  | 0.643 | 1.716 | 0.006  | 0.049 |
| GO_STRIATED_MUSCLE_ADAPTATION                                                                                   | 23  | 0.571 | 1.715 | 0.011  | 0.049 |
| GO_POSITIVE_REGULATION_OF_SMOOTH_MUSCLE_CELL_MIGRATION                                                          | 30  | 0.585 | 1.715 | 0.027  | 0.049 |
| GO_REGULATION_OF_BODY_FLUID_LEVELS                                                                              | 478 | 0.377 | 1.715 | <0.001 | 0.049 |
| GO_RESPONSE_TO_FATTY_ACID                                                                                       | 83  | 0.421 | 1.715 | 0.004  | 0.049 |
| GO_EXCITATORY_EXTRACELLULAR_LIGAND_GATED_ION_CHANNEL_ACTIVITY                                                   | 55  | 0.517 | 1.714 | 0.014  | 0.049 |
| GO_ADHERENS_JUNCTION_ASSEMBLY                                                                                   | 33  | 0.539 | 1.714 | 0.012  | 0.049 |
| GO_SUBSTRATE_DEPENDENT_CELL_MIGRATION                                                                           | 26  | 0.547 | 1.713 | 0.021  | 0.049 |
| GO_NEGATIVE_REGULATION_OF_CYTOPLASMIC_TRANSPORT                                                                 | 113 | 0.386 | 1.713 | <0.001 | 0.049 |
| GO_SODIUM_CHANNEL_COMPLEX                                                                                       | 17  | 0.639 | 1.713 | 0.012  | 0.049 |
| GO_MUSCLE_CELL_MIGRATION                                                                                        | 18  | 0.604 | 1.713 | 0.015  | 0.049 |
| GO_REGULATION_OF_CELL_GROWTH                                                                                    | 375 | 0.352 | 1.711 | <0.001 | 0.050 |
| GO_REGULATION_OF_SYNAPTIC_PLASTICITY                                                                            | 137 | 0.424 | 1.711 | 0.004  | 0.050 |
| GO_POSITIVE_REGULATION_OF_SEQUENCESTERING_OF_CALCIIUM_ION                                                       | 16  | 0.617 | 1.710 | 0.023  | 0.050 |
| GO_REGULATION_OF_SYNAPTIC_TRANSMISSION_GABAERGIC                                                                | 28  | 0.558 | 1.710 | 0.004  | 0.050 |
| GO_NEGATIVE_REGULATION_OF_PLATELET_ACTIVATION                                                                   | 17  | 0.649 | 1.709 | 0.016  | 0.050 |
| GO_TRANSCRIPTIONAL_ACTIVATOR_ACTIVITY_RNA_POLYMERASE_II_CORE_PROMOTER_PROXIMAL_REGION_SEQUENCE_SPECIFIC_BINDING | 223 | 0.381 | 1.709 | <0.001 | 0.050 |
| GO_CAMERA_TYPE_EYE_MORPHOGENESIS                                                                                | 97  | 0.424 | 1.709 | 0.002  | 0.050 |
| GO_SECRETION_BY_CELL                                                                                            | 467 | 0.368 | 1.709 | <0.001 | 0.050 |
| GO_EPITHELIAL_CELL_DEVELOPMENT                                                                                  | 180 | 0.384 | 1.709 | 0.004  | 0.050 |
| GO_RESPONSE_TO_VITAMIN_D                                                                                        | 33  | 0.523 | 1.708 | 0.011  | 0.051 |
| GO_GROWTH                                                                                                       | 391 | 0.372 | 1.707 | 0.002  | 0.051 |
| GO_REGULATION_OF_LIPID_KINASE_ACTIVITY                                                                          | 47  | 0.479 | 1.707 | 0.020  | 0.051 |
| GO_NEURON_MIGRATION                                                                                             | 106 | 0.436 | 1.707 | 0.017  | 0.051 |

|                                                                                                              |     |       |       |        |       |
|--------------------------------------------------------------------------------------------------------------|-----|-------|-------|--------|-------|
| GO_REGULATION_OF_KIDNEY_DEVELOPMENT                                                                          | 55  | 0.470 | 1.707 | 0.010  | 0.051 |
| GO_REGULATION_OF_ALPHA_AMINO_3_HYDROXY_5_METHYL_4_ISOXAZOLE_PROPIONATE_SELECTIVE_Glutamate_Receptor_Activity | 19  | 0.631 | 1.706 | 0.012  | 0.051 |
| GO_REGULATION_OF_MORPHOGENESIS_OF_A_BRANCHING_STRUCTURE                                                      | 53  | 0.481 | 1.706 | 0.008  | 0.051 |
| GO_REGULATION_OF_ENDOCYTOSIS                                                                                 | 197 | 0.398 | 1.706 | 0.004  | 0.051 |
| GO_NEGATIVE_REGULATION_OF_TRANSFORMING_GROWTH_FACTOR_BETA_RECEPTOR_SIGNALING_PATHWAY                         | 65  | 0.453 | 1.705 | 0.008  | 0.051 |
| GO_REGULATION_OF_RESPIRATORY_GASEOUS_EXCHANGE                                                                | 22  | 0.583 | 1.705 | 0.013  | 0.051 |
| GO_PHAGOCYTOSIS_ENGULFMENT                                                                                   | 19  | 0.642 | 1.705 | 0.021  | 0.051 |
| GO_POSITIVE_REGULATION_OF_MUSCLE_CONTRACTION                                                                 | 43  | 0.459 | 1.705 | 0.006  | 0.051 |
| GO_G_PROTEIN_COUPLED_RECEPTOR_BINDING                                                                        | 245 | 0.387 | 1.705 | <0.001 | 0.051 |
| GO_ENDOPLASMIC_RETICULUM_LUMEN                                                                               | 190 | 0.438 | 1.704 | 0.012  | 0.051 |
| GO_NEGATIVE_REGULATION_OF_LEUKOCYTE_APOPTOTIC_PROCESS                                                        | 42  | 0.523 | 1.703 | 0.017  | 0.051 |
| GO_RESPONSE_TO_CAMP                                                                                          | 103 | 0.415 | 1.703 | 0.006  | 0.052 |
| GO_VOLTAGE_GATED_ION_CHANNEL_ACTIVITY                                                                        | 185 | 0.439 | 1.703 | 0.004  | 0.052 |
| GO_REGULATION_OF_INFLAMMATORY_RESPONSE_TO_ANTIGENIC_STIMULUS                                                 | 17  | 0.658 | 1.703 | 0.014  | 0.052 |
| GO_SIDE_OF_MEMBRANE                                                                                          | 392 | 0.408 | 1.702 | 0.013  | 0.052 |
| GO_HEMOSTASIS                                                                                                | 290 | 0.395 | 1.702 | 0.006  | 0.052 |
| GO_AMEBOIDAL_TYPE_CELL_MIGRATION                                                                             | 150 | 0.421 | 1.702 | 0.010  | 0.052 |
| GO_REGULATION_OF_MYOTUBE_DIFFERENTIATION                                                                     | 52  | 0.445 | 1.702 | 0.006  | 0.052 |
| GO_NEGATIVE_REGULATION_OF_CELL_MORPHOGENESIS_INVOLVED_IN_DIFFERENTIATION                                     | 113 | 0.402 | 1.701 | 0.010  | 0.052 |
| GO_POSITIVE_REGULATION_OF_RESPONSE_TO_WOUNDING                                                               | 159 | 0.442 | 1.701 | 0.010  | 0.052 |
| GO_REGULATION_OF_CATENIN_IMPORT INTO_NUCLEUS                                                                 | 27  | 0.526 | 1.701 | 0.010  | 0.052 |
| GO_NEGATIVE_REGULATION_OF_ENDOTHELIAL_CELL_PROLIFERATION                                                     | 30  | 0.540 | 1.700 | 0.016  | 0.052 |



|                                                                      |     |       |       |        |       |
|----------------------------------------------------------------------|-----|-------|-------|--------|-------|
| GO_MEGAKARYOCYTE_DIFFERENTIATION                                     | 19  | 0.567 | 1.700 | 0.008  | 0.052 |
| GO_CYTOKINE_ACTIVITY                                                 | 193 | 0.432 | 1.700 | 0.006  | 0.052 |
| GO_ACTININ_BINDING                                                   | 29  | 0.534 | 1.699 | 0.029  | 0.052 |
| GO_NEURONAL_POSTSYNAPTIC_DENSITY                                     | 51  | 0.519 | 1.699 | 0.014  | 0.052 |
| GO_REGULATION_OF_HOMEOSTATIC_PROCESS                                 | 429 | 0.343 | 1.699 | <0.001 | 0.052 |
| GO_REGULATION_OF_FILOPODIUM_ASSEMBLY                                 | 34  | 0.485 | 1.698 | 0.016  | 0.052 |
| GO_REGULATION_OF_PROTEIN_AUTOPHOSPHORYLATION                         | 34  | 0.507 | 1.698 | 0.017  | 0.053 |
| GO_REGULATION_OF_GLIAL_CELL_PROLIFERATION                            | 21  | 0.503 | 1.697 | 0.012  | 0.053 |
| GO_NEGATIVE_REGULATION_OF_TRANSPORT                                  | 431 | 0.357 | 1.697 | <0.001 | 0.053 |
| GO_REGULATION_OF_STEM_CELL_DIFFERENTIATION                           | 108 | 0.415 | 1.696 | 0.006  | 0.053 |
| GO_NEURON_PROJECTION_MEMBRANE                                        | 34  | 0.526 | 1.696 | 0.011  | 0.053 |
| GO_CELL_CELL_ADHERENS_JUNCTION                                       | 50  | 0.491 | 1.696 | 0.014  | 0.053 |
| GO_REGULATION_OF_NEUROTRANSMITTER_RECEPTOR_ACTIVITY                  | 30  | 0.547 | 1.695 | 0.015  | 0.053 |
| GO_NEGATIVE_REGULATION_OF_FAT_CELL_DIFFERENTIATION                   | 40  | 0.484 | 1.695 | 0.008  | 0.053 |
| GO_WNT_ACTIVATED_RECEPTOR_ACTIVITY                                   | 22  | 0.590 | 1.695 | 0.014  | 0.053 |
| GO_NEGATIVE_REGULATION_OF_HORMONE_SECRETION                          | 70  | 0.437 | 1.694 | 0.008  | 0.053 |
| GO_RESPONSE_TO_CALCIUM_ION                                           | 112 | 0.403 | 1.693 | 0.002  | 0.054 |
| GO_NEPHRIC_DUCT_DEVELOPMENT                                          | 15  | 0.612 | 1.693 | 0.018  | 0.054 |
| GO_G_PROTEIN_COUPLED_CHEMOTACTANT_RECEPTOR_ACTIVITY                  | 22  | 0.692 | 1.692 | 0.037  | 0.054 |
| GO_ACTIVATION_OF_MAPK_ACTIVITY                                       | 133 | 0.400 | 1.692 | <0.001 | 0.054 |
| GO_BODY_MORPHOGENESIS                                                | 43  | 0.513 | 1.691 | 0.015  | 0.055 |
| GO_REGULATION_OF_TUMOR_NECROSIS_FACTOR_BIOSYNTHETIC_PROCESS          | 18  | 0.634 | 1.690 | 0.024  | 0.055 |
| GO_ENDOTHELIAL_CELL_DEVELOPMENT                                      | 44  | 0.492 | 1.690 | 0.016  | 0.055 |
| GO_REGULATION_OF_CARDIAC_MUSCLE_CONTRACTION_BY_CALCIUM_ION_SIGNALING | 23  | 0.616 | 1.689 | 0.040  | 0.055 |
| GO_T_CELL_SELECTION                                                  | 36  | 0.617 | 1.688 | 0.041  | 0.055 |

|                                                              |     |       |       |        |       |
|--------------------------------------------------------------|-----|-------|-------|--------|-------|
| GO_REGULATION_OF_STRIATED_MUSCLE_CELL_DIFFERENTIATION        | 81  | 0.406 | 1.687 | 0.004  | 0.056 |
| GO_ADRENERGIC_RECEPTOR_SIGNALING_PATHWAY                     | 18  | 0.601 | 1.687 | 0.008  | 0.056 |
| GO_KERATAN_SULFATE_METABOLIC_PROCESS                         | 32  | 0.521 | 1.687 | 0.016  | 0.056 |
| GO_CELLULAR_RESPONSE_TO_NUTRIENT                             | 38  | 0.475 | 1.686 | 0.022  | 0.056 |
| GO_AUTONOMIC_NERVOUS_SYSTEM_DEVELOPMENT                      | 40  | 0.519 | 1.686 | 0.004  | 0.056 |
| GO_ADHERENS_JUNCTION_ORGANIZATION                            | 65  | 0.447 | 1.685 | 0.002  | 0.057 |
| GO_ATRIOVENTRICULAR_VALVE_DEVELOPMENT                        | 19  | 0.589 | 1.685 | 0.012  | 0.057 |
| GO_REGULATION_OF_BONE_REMODELING                             | 39  | 0.469 | 1.682 | 0.008  | 0.058 |
| GO_REGULATION_OF_RAS_PROTEIN_SIGNAL_TRANSDUCTION             | 180 | 0.412 | 1.682 | 0.008  | 0.058 |
| GO_ORGAN_MATURATION                                          | 18  | 0.574 | 1.681 | 0.015  | 0.058 |
| GO_CELL_BODY                                                 | 482 | 0.360 | 1.681 | 0.002  | 0.058 |
| GO_SERINE_TYPE_EXOPEPTIDASE_ACTIVITY                         | 18  | 0.591 | 1.680 | 0.018  | 0.058 |
| GO_REGULATION_OF_LEUKOCYTE_CHEMOTAXIS                        | 93  | 0.482 | 1.680 | 0.031  | 0.058 |
| GO_RESPONSE_TO_ESTROGEN                                      | 215 | 0.364 | 1.680 | 0.002  | 0.058 |
| GO_PLATELET_DERIVED_GROWTH_FACTOR_RECEPTOR_SIGNALING_PATHWAY | 34  | 0.558 | 1.679 | 0.024  | 0.058 |
| GO_OVULATION                                                 | 17  | 0.620 | 1.679 | 0.023  | 0.058 |
| GO_NEGATIVE_REGULATION_OF_INTRACELLULAR_SIGNAL_TRANSDUCTION  | 418 | 0.342 | 1.679 | <0.001 | 0.058 |
| GO_PROSTATE_GLAND_MORPHOGENESIS                              | 23  | 0.552 | 1.679 | 0.018  | 0.058 |
| GO_SYMPATHETIC_NERVOUS_SYSTEM_DEVELOPMENT                    | 21  | 0.604 | 1.678 | 0.013  | 0.058 |
| GO_REGULATION_OF_PEPTIDYL_SERINE_PHOSPHORYLATION             | 101 | 0.404 | 1.678 | 0.006  | 0.058 |
| GO_RESPONSE_TO_STEROL                                        | 23  | 0.545 | 1.678 | 0.021  | 0.058 |
| GO_REGULATION_OF_NEUTROPHIL_MIGRATION                        | 30  | 0.541 | 1.678 | 0.035  | 0.058 |
| GO_POSITIVE_REGULATION_OF_EXCITATORY_POSTSYNAPTIC_POTENTIAL  | 21  | 0.579 | 1.678 | 0.024  | 0.058 |
| GO_REGULATION_OF_CIRCADIAN_SLEEP_WAKE_CYCLE                  | 23  | 0.576 | 1.677 | 0.010  | 0.059 |

|                                                                                  |     |       |       |        |       |
|----------------------------------------------------------------------------------|-----|-------|-------|--------|-------|
| GO_EAR_DEVELOPMENT                                                               | 191 | 0.388 | 1.676 | 0.004  | 0.059 |
| GO_INTRACELLULAR_LIGAND_GATED<br>_ION_CHANNEL_ACTIVITY                           | 27  | 0.524 | 1.676 | 0.013  | 0.059 |
| GO_REGULATION_OF_SYNCYTIUM_FO<br>RMATION_BY_PLASMA_MEMBRANE_F<br>USION           | 22  | 0.562 | 1.676 | 0.024  | 0.059 |
| GO_ACTIVATION_OF_PROTEIN_KINASE<br>_ACTIVITY                                     | 271 | 0.360 | 1.676 | <0.001 | 0.059 |
| GO_GLIAL_CELL_DIFFERENTIATION                                                    | 131 | 0.408 | 1.676 | 0.006  | 0.059 |
| GO_REGULATION_OF_FIBROBLAST_MI<br>GRATION                                        | 27  | 0.532 | 1.674 | 0.014  | 0.059 |
| GO_POSITIVE_REGULATION_OF_CELL_<br>MORPHOGENESIS_INVOLVED_IN_DIFF<br>ERENTIATION | 158 | 0.391 | 1.674 | 0.008  | 0.059 |
| GO_NEGATIVE_REGULATION_OF_STE<br>M_CELL_PROLIFERATION                            | 16  | 0.577 | 1.674 | 0.008  | 0.059 |
| GO_OLFACTORY_BULB_INTERNEURO<br>N_DIFFERENTIATION                                | 15  | 0.622 | 1.674 | 0.026  | 0.060 |
| GO_CELL_FATE_COMMITMENT                                                          | 223 | 0.388 | 1.673 | 0.002  | 0.060 |
| GO_POSITIVE_REGULATION_OF_NUCL<br>EOTIDE_CATABOLIC_PROCESS                       | 15  | 0.597 | 1.673 | 0.020  | 0.060 |
| GO_REGULATION_OF_NEUROLOGICAL<br>_SYSTEM_PROCESS                                 | 61  | 0.456 | 1.673 | 0.009  | 0.060 |
| GO_POSITIVE_REGULATION_OF_INFLA<br>MMATORY_RESPONSE                              | 112 | 0.465 | 1.673 | 0.025  | 0.060 |
| GO_PRESYNAPTIC_MEMBRANE                                                          | 52  | 0.511 | 1.671 | 0.025  | 0.060 |
| GO_REGULATION_OF_NEUROTRANSMI<br>TTER_SECRETION                                  | 45  | 0.492 | 1.671 | 0.021  | 0.060 |
| GO_LIGAND_GATED_CHANNEL_ACTIV<br>ITY                                             | 137 | 0.423 | 1.671 | 0.010  | 0.060 |
| GO_REGULATION_OF_INSULIN_LIKE_G<br>ROWTH_FACTOR_RECEPTOR_SIGNALI<br>NG_PATHWAY   | 22  | 0.527 | 1.671 | 0.015  | 0.060 |
| GO_NEGATIVE_REGULATION_OF_LYAS<br>E_ACTIVITY                                     | 27  | 0.516 | 1.670 | 0.006  | 0.060 |
| GO_CARBOHYDRATE_BINDING                                                          | 255 | 0.390 | 1.670 | 0.006  | 0.060 |
| GO_CELL_FATE_SPECIFICATION                                                       | 70  | 0.436 | 1.670 | 0.004  | 0.060 |
| GO_DEVELOPMENTAL_MATURATION                                                      | 181 | 0.376 | 1.670 | 0.004  | 0.060 |
| GO_ESTROUS_CYCLE                                                                 | 19  | 0.578 | 1.668 | 0.017  | 0.061 |
| GO_NEUROMUSCULAR_SYNAPTIC_TR<br>ANSMISSION                                       | 26  | 0.541 | 1.668 | 0.014  | 0.061 |
| GO_FOREBRAIN_GENERATION_OF_NE<br>URONS                                           | 66  | 0.460 | 1.667 | 0.010  | 0.061 |
| GO_POSITIVE_REGULATION_OF_EPITH                                                  | 55  | 0.439 | 1.667 | 0.008  | 0.061 |

---

|                                                                                                                   |     |       |       |        |       |
|-------------------------------------------------------------------------------------------------------------------|-----|-------|-------|--------|-------|
| ELIAL_CELL_DIFFERENTIATION                                                                                        |     |       |       |        |       |
| GO_NEGATIVE_REGULATION_OF_CELLULAR_PROTEIN_LOCALIZATION                                                           | 132 | 0.370 | 1.667 | 0.002  | 0.061 |
| GO_REGULATION_OF_RHO_PROTEIN_SIGNAL_TRANSDUCTION                                                                  | 106 | 0.433 | 1.667 | 0.012  | 0.061 |
| GO_RESPONSE_TO_NICOTINE                                                                                           | 51  | 0.447 | 1.667 | 0.002  | 0.061 |
| GO_PLATELET_AGGREGATION                                                                                           | 38  | 0.515 | 1.666 | 0.022  | 0.062 |
| GO_NEGATIVE_REGULATION_OF_SECRETION                                                                               | 185 | 0.373 | 1.665 | <0.001 | 0.062 |
| GO_POSITIVE_REGULATION_OF_ACUTE_INFLAMMATORY_RESPONSE                                                             | 28  | 0.551 | 1.665 | 0.016  | 0.062 |
| GO_REGULATION_OF_GLUCOSE_IMPORT                                                                                   | 56  | 0.449 | 1.665 | 0.016  | 0.062 |
| GO_NEGATIVE_REGULATION_OF_CELL_PROJECTION_ORGANIZATION                                                            | 140 | 0.397 | 1.664 | 0.008  | 0.062 |
| GO_REGULATION_OF_T_HELPER_1_TYPE_IMMUNE_RESPONSE                                                                  | 22  | 0.607 | 1.664 | 0.020  | 0.062 |
| GO_STRIATUM_DEVELOPMENT                                                                                           | 16  | 0.569 | 1.664 | 0.023  | 0.062 |
| GO_TRANSCRIPTIONAL_ACTIVATOR_ACTIVITY_RNA_POLYMERASE_II_TRANSCRIPTION_REGULATORY_REGION_SEQUENCE_SPECIFIC_BINDING | 308 | 0.361 | 1.664 | <0.001 | 0.062 |
| GO_RESPONSE_TO_GLUCAGON                                                                                           | 48  | 0.479 | 1.664 | 0.012  | 0.062 |
| GO_OVULATION_CYCLE                                                                                                | 110 | 0.391 | 1.663 | <0.001 | 0.062 |
| GO_PHENOL_CONTAINING_COMPOUND_METABOLIC_PROCESS                                                                   | 79  | 0.425 | 1.663 | 0.004  | 0.062 |
| GO_SUBPALLIUM_DEVELOPMENT                                                                                         | 22  | 0.552 | 1.663 | 0.006  | 0.062 |
| GO_POSITIVE_REGULATION_OF_PHAGOCYTOSIS                                                                            | 46  | 0.480 | 1.662 | 0.016  | 0.063 |
| GO_CELL_SUBSTRATE_JUNCTION_ASSEMBLY                                                                               | 40  | 0.545 | 1.662 | 0.027  | 0.063 |
| GO_HETEROTYPIC_CELL_CELL_ADHESION                                                                                 | 27  | 0.558 | 1.662 | 0.029  | 0.063 |
| GO_MUSCLE_ORGAN_MORPHOGENESIS                                                                                     | 67  | 0.426 | 1.661 | 0.006  | 0.063 |
| GO_DEVELOPMENTAL_GROWTH                                                                                           | 319 | 0.373 | 1.661 | 0.004  | 0.063 |
| GO_RETINA_DEVELOPMENT_IN_CAMERALA_TYPE_EYE                                                                        | 126 | 0.406 | 1.661 | 0.004  | 0.063 |
| GO_REGULATION_OF_VASCULAR_ENDOTHELIAL_GROWTH_FACTOR_PRODUCTION                                                    | 31  | 0.531 | 1.661 | 0.021  | 0.063 |
| GO_CELL_SUBSTRATE_ADHERENS_JUNCTION_ASSEMBLY                                                                      | 23  | 0.541 | 1.660 | 0.018  | 0.063 |
| GO_REGULATION_OF_TYROSINE_PHOSPHORYLATION                                                                         | 19  | 0.555 | 1.659 | 0.019  | 0.063 |

---

|                                                                         |     |       |       |       |       |
|-------------------------------------------------------------------------|-----|-------|-------|-------|-------|
| PHORYLATION_OF_STAT5_PROTEIN                                            |     |       |       |       |       |
| GO_DETECTION_OF_BIOTIC_STIMULUS                                         | 25  | 0.617 | 1.658 | 0.027 | 0.064 |
| GO_NEGATIVE_REGULATION_OF_CALCIUM_ION_IMPORT                            | 23  | 0.513 | 1.657 | 0.018 | 0.064 |
| GO_BLOOD_VESSEL_ENDOTHELIAL_CELL_MIGRATION                              | 24  | 0.557 | 1.657 | 0.022 | 0.064 |
| GO_REGULATION_OF_MUSCLE_CELL_APOPTOTIC_PROCESS                          | 42  | 0.444 | 1.655 | 0.004 | 0.065 |
| GO_POSITIVE_REGULATION_OF_MUSCLE_HYPERTROPHY                            | 21  | 0.531 | 1.655 | 0.012 | 0.065 |
| GO_ENDOCARDIAL_CUSHION_MORPHOGENESIS                                    | 22  | 0.579 | 1.654 | 0.018 | 0.065 |
| GO_POSITIVE_REGULATION_OF_VASCULAR_ENDOTHELIAL_GROWTH_FACTOR_PRODUCTION | 26  | 0.545 | 1.654 | 0.028 | 0.065 |
| GO_CONNEXON_COMPLEX                                                     | 20  | 0.564 | 1.654 | 0.019 | 0.065 |
| GO_RESPONSE_TO_WATER                                                    | 18  | 0.539 | 1.653 | 0.018 | 0.065 |
| GO_REGULATION_OF_CELL_SIZE                                              | 167 | 0.380 | 1.653 | 0.006 | 0.065 |
| GO_ENDOCARDIAL_CUSHION_FORMATION                                        | 15  | 0.655 | 1.653 | 0.010 | 0.066 |
| GO_SKELETAL_SYSTEM_MORPHOGENESIS                                        | 196 | 0.403 | 1.650 | 0.012 | 0.067 |
| GO_REGULATION_OF_SMOOTH_MUSCLE_CELL_PROLIFERATION                       | 99  | 0.428 | 1.650 | 0.011 | 0.067 |
| GO_EXTRINSIC_COMPONENT_OF_CYTOSOLIC_SIDE_OF_PLASMA_MEMBRANE             | 96  | 0.437 | 1.650 | 0.027 | 0.067 |
| GO_NEGATIVE_REGULATION_OF_AXONOGENESIS                                  | 64  | 0.441 | 1.649 | 0.012 | 0.067 |
| GO_POSITIVE_REGULATION_OF_MACROPHAGE_DERIVED_FOAM_CELL_DIFFERENTIATION  | 15  | 0.622 | 1.649 | 0.022 | 0.067 |
| GO_NEGATIVE_REGULATION_OF_REPRODUCTIVE_PROCESS                          | 52  | 0.446 | 1.649 | 0.008 | 0.067 |
| GO_POSITIVE_REGULATION_OF_DEPHOSPHORYLATION                             | 44  | 0.472 | 1.649 | 0.014 | 0.067 |
| GO_NEGATIVE_REGULATION_OF_RECEPTOR_ACTIVITY                             | 29  | 0.470 | 1.649 | 0.017 | 0.067 |
| GO_REGULATION_OF_BONE_DEVELOPMENT                                       | 16  | 0.602 | 1.648 | 0.033 | 0.067 |
| GO_DETECTION_OF_MECHANICAL_STIMULUS                                     | 39  | 0.514 | 1.647 | 0.047 | 0.067 |
| GO_VASODILATION                                                         | 26  | 0.534 | 1.647 | 0.014 | 0.067 |

---

|                                                         |     |       |       |       |       |
|---------------------------------------------------------|-----|-------|-------|-------|-------|
| GO_G_PROTEIN_ALPHA_SUBUNIT_BINDING                      | 22  | 0.536 | 1.647 | 0.030 | 0.067 |
| GO_ATRIOVENTRICULAR_VALVE_MORPHOGENESIS                 | 16  | 0.595 | 1.647 | 0.030 | 0.067 |
| GO_REGULATION_OF_STEM_CELL_PROLIFERATION                | 85  | 0.408 | 1.647 | 0.004 | 0.067 |
| GO_RIBONUCLEOTIDE_CATABOLIC_PROCESS                     | 28  | 0.519 | 1.646 | 0.021 | 0.068 |
| GO_CALCIIUM_CHANNEL_REGULATOR_ACTIVITY                  | 37  | 0.477 | 1.646 | 0.017 | 0.068 |
| GO_EXPLORATION_BEHAVIOR                                 | 23  | 0.573 | 1.646 | 0.008 | 0.067 |
| GO_RHO_PROTEIN_SIGNAL_TRANSDUCTION                      | 47  | 0.453 | 1.646 | 0.018 | 0.067 |
| GO_COSTAMERE                                            | 19  | 0.701 | 1.646 | 0.038 | 0.067 |
| GO_RESPONSE_TO_ORGANOPHOSPHORUS                         | 138 | 0.390 | 1.645 | 0.004 | 0.068 |
| GO_ACTIVATION_OF_PROTEIN_KINASE_A_ACTIVITY              | 17  | 0.592 | 1.644 | 0.024 | 0.068 |
| GO_CELL_COMMUNICATION_BY_ELECTRICAL_COUPLING            | 15  | 0.624 | 1.644 | 0.034 | 0.068 |
| GO_PHOSPHATIDYLSERINE_BINDING                           | 32  | 0.477 | 1.644 | 0.012 | 0.068 |
| GO_POTASSIUM_CHANNEL_REGULATOR_ACTIVITY                 | 44  | 0.461 | 1.644 | 0.017 | 0.068 |
| GO_EXOCYTOSIS                                           | 297 | 0.363 | 1.643 | 0.004 | 0.068 |
| GO_CELLULAR_RESPONSE_TO_AMINO_ACID_STIMULUS             | 48  | 0.454 | 1.643 | 0.024 | 0.068 |
| GO_POSITIVE_REGULATION_OF_STAT_CASCADE                  | 70  | 0.445 | 1.643 | 0.018 | 0.068 |
| GO_REGULATION_OF_HUMORAL_IMMUNE_RESPONSE                | 48  | 0.483 | 1.642 | 0.026 | 0.069 |
| GO_ACTIN_CYTOSKELETON                                   | 425 | 0.362 | 1.642 | 0.008 | 0.069 |
| GO_REGULATION_OF_MITOCHONDRIAL_DEPOLARIZATION           | 17  | 0.578 | 1.642 | 0.016 | 0.069 |
| GO_NEGATIVE_REGULATION_OF_BIOMINERAL_TISSUE_DEVELOPMENT | 17  | 0.560 | 1.641 | 0.013 | 0.069 |
| GO_EMBRYONIC_ORGAN_MORPHOGENESIS                        | 276 | 0.374 | 1.641 | 0.008 | 0.069 |
| GO_VOLTAGE_GATED_SODIUM_CHANNEL_ACTIVITY                | 20  | 0.597 | 1.641 | 0.028 | 0.069 |
| GO_CELL_JUNCTION_ORGANIZATION                           | 177 | 0.399 | 1.641 | 0.012 | 0.069 |
| GO_MULTICELLULAR_ORGANISMAL_HOMEOSTASIS                 | 257 | 0.364 | 1.639 | 0.002 | 0.070 |
| GO_ADULT_BEHAVIOR                                       | 133 | 0.427 | 1.639 | 0.013 | 0.070 |
| GO_SMAD_BINDING                                         | 70  | 0.442 | 1.639 | 0.022 | 0.070 |

|                                                         |     |       |       |        |       |
|---------------------------------------------------------|-----|-------|-------|--------|-------|
| GO_POSITIVE_REGULATION_OF_KINASE_ACTIVITY               | 463 | 0.333 | 1.638 | <0.001 | 0.070 |
| GO_PURINERGIC_RECEPTOR_SIGNALING_PATHWAY                | 27  | 0.569 | 1.638 | 0.025  | 0.070 |
| GO_DENDRITE_MORPHOGENESIS                               | 42  | 0.495 | 1.636 | 0.026  | 0.071 |
| GO_MODULATION_OF_EXCITATORY_POSTSYNAPTIC_POTENTIAL      | 30  | 0.521 | 1.636 | 0.021  | 0.070 |
| GO_POSITIVE_REGULATION_OF_DEVELOPMENTAL_GROWTH          | 150 | 0.386 | 1.636 | 0.004  | 0.071 |
| GO_PROTEIN_COMPLEX_INVOLVED_IN_CELL_ADHESION            | 30  | 0.572 | 1.636 | 0.045  | 0.071 |
| GO_PHOSPHORIC_DIESTER_HYDROLASE_ACTIVITY                | 90  | 0.396 | 1.635 | 0.006  | 0.071 |
| GO_CATECHOLAMINE_METABOLIC_PROCESS                      | 41  | 0.452 | 1.635 | 0.013  | 0.071 |
| GO_SITE_OF_POLARIZED_GROWTH                             | 141 | 0.382 | 1.634 | 0.004  | 0.071 |
| GO_POSITIVE_REGULATION_OF_MUSCLE_TISSUE_DEVELOPMENT     | 54  | 0.439 | 1.634 | 0.015  | 0.071 |
| GO_REGULATION_OF_ACTIN_FILAMENT_BASED_MOVEMENT          | 32  | 0.472 | 1.634 | 0.016  | 0.071 |
| GO_RESPONSE_TO_PURINE_CONTAINING_COMPOUND               | 156 | 0.371 | 1.633 | 0.002  | 0.071 |
| GO_POSITIVE_REGULATION_OF_FILIPODIUM_ASSEMBLY           | 23  | 0.519 | 1.633 | 0.036  | 0.071 |
| GO_NEGATIVE_REGULATION_OF_PROTEIN_SECRETION             | 98  | 0.389 | 1.633 | 0.011  | 0.071 |
| GO_LOCOMOTORY_BEHAVIOR                                  | 176 | 0.407 | 1.633 | 0.004  | 0.071 |
| GO_NEGATIVE_REGULATION_OF_MUSCLE_CELL_APOPTOTIC_PROCESS | 30  | 0.484 | 1.633 | 0.018  | 0.071 |
| GO_MONOCYTE_DIFFERENTIATION                             | 16  | 0.554 | 1.632 | 0.030  | 0.072 |
| GO_RESPONSE_TO_KETONE                                   | 179 | 0.370 | 1.631 | 0.004  | 0.072 |
| GO_NEGATIVE_REGULATION_OF_BLOOD_PRESSURE                | 43  | 0.464 | 1.631 | 0.021  | 0.072 |
| GO_REGULATION_OF_EPITHELIAL_CELL_DIFFERENTIATION        | 119 | 0.377 | 1.631 | 0.002  | 0.072 |
| GO_MORPHOGENESIS_OF_AN_ENDOTHELIAL_CELL                 | 16  | 0.575 | 1.630 | 0.045  | 0.072 |
| GO_NEGATIVE_REGULATION_OF_POTASSIUM_ION_TRANSPORT       | 30  | 0.505 | 1.630 | 0.024  | 0.072 |
| GO_SECRETORY_VESICLE                                    | 441 | 0.349 | 1.630 | 0.002  | 0.072 |
| GO_NEUROPEPTIDE_RECEPTOR_ACTIVITY                       | 41  | 0.509 | 1.630 | 0.021  | 0.072 |
| GO_REGULATION_OF_MUSCLE_TISSUE_DEVELOPMENT              | 98  | 0.405 | 1.629 | 0.016  | 0.073 |

|                                                                    |     |       |       |       |       |
|--------------------------------------------------------------------|-----|-------|-------|-------|-------|
| GO_DEFINITIVE_HEMOPOIESIS                                          | 16  | 0.573 | 1.628 | 0.024 | 0.073 |
| GO_REGULATION_OF_CELL_MIGRATION_INVOLVED_IN_SPROUTING_ANGIOGENESIS | 19  | 0.544 | 1.628 | 0.036 | 0.073 |
| GO_CELL_SUBSTRATE_JUNCTION                                         | 388 | 0.385 | 1.628 | 0.029 | 0.073 |
| GO_CENTRAL_NERVOUS_SYSTEM_NEURON_AXONOGENESIS                      | 27  | 0.555 | 1.628 | 0.023 | 0.073 |
| GO_DENDRITE_DEVELOPMENT                                            | 79  | 0.425 | 1.627 | 0.012 | 0.073 |
| GO_POSITIVE_REGULATION_OF_LEUKOCYTE_MIGRATION                      | 107 | 0.458 | 1.627 | 0.032 | 0.073 |
| GO_CARDIAC_EPITHELIAL_TO_MESENCHYMAL_TRANSITION                    | 24  | 0.559 | 1.627 | 0.046 | 0.073 |
| GO_REGULATION_OF_ENDOCRINE_PROCESS                                 | 47  | 0.470 | 1.626 | 0.010 | 0.073 |
| GO_REGULATION_OF_EPITHELIAL_CELL_APOPTOTIC_PROCESS                 | 56  | 0.465 | 1.626 | 0.016 | 0.073 |
| GO_NEGATIVE_REGULATION_OF_OXIDOREDUCTASE_ACTIVITY                  | 24  | 0.488 | 1.626 | 0.026 | 0.073 |
| GO_TISSUE_MIGRATION                                                | 81  | 0.430 | 1.625 | 0.017 | 0.074 |
| GO_NEGATIVE_REGULATION_OF_CELL_MATRIX_ADHESION                     | 28  | 0.521 | 1.625 | 0.029 | 0.074 |
| GO_LEUKOCYTE_DIFFERENTIATION                                       | 274 | 0.418 | 1.625 | 0.050 | 0.074 |
| GO_LAMELLIPODIUM_MEMBRANE                                          | 19  | 0.586 | 1.625 | 0.018 | 0.074 |
| GO_EPITHELIAL_CELL_DIFFERENTIATION_INVOLVED_IN_KIDNEY_DEVELOPMENT  | 24  | 0.530 | 1.625 | 0.042 | 0.074 |
| GO_POSITIVE_REGULATION_OF_PROTEIN_SERINE_THREONINE_KINASE_ACTIVITY | 279 | 0.346 | 1.625 | 0.002 | 0.073 |
| GO_ACTOMYOSIN_STRUCTURE_ORGANIZATION                               | 73  | 0.447 | 1.624 | 0.034 | 0.074 |
| GO_BLOOD_COAGULATION_INTRINSIC_PATHWAY                             | 16  | 0.593 | 1.624 | 0.045 | 0.074 |
| GO_DETECTION_OF_OTHER_ORGANISM                                     | 17  | 0.654 | 1.623 | 0.035 | 0.074 |
| GO_CEREBRAL_CORTEX_CELL_MIGRATION                                  | 41  | 0.465 | 1.623 | 0.029 | 0.074 |
| GO_CENTRAL_NERVOUS_SYSTEM_PROJECTION_NEURON_AXONOGENESIS           | 22  | 0.581 | 1.622 | 0.025 | 0.074 |
| GO_GLAND_MORPHOGENESIS                                             | 97  | 0.415 | 1.622 | 0.010 | 0.074 |
| GO_REGULATION_OF_METANEPHROS_DEVELOPMENT                           | 23  | 0.541 | 1.621 | 0.021 | 0.075 |
| GO_RESPONSE_TO_CORTICOSTEROID                                      | 173 | 0.366 | 1.621 | 0.004 | 0.075 |
| GO_POSITIVE_REGULATION_OF_RECE                                     | 24  | 0.487 | 1.621 | 0.016 | 0.075 |



---

|                                                                |     |       |       |       |       |
|----------------------------------------------------------------|-----|-------|-------|-------|-------|
| PTOR_INTERNALIZATION                                           |     |       |       |       |       |
| GO_REGULATION_OF_AMINO_ACID_TRANSPORT                          | 25  | 0.515 | 1.621 | 0.013 | 0.075 |
| GO_PROTEIN_TARGETING_TO_PLASMA_MEMBRANE                        | 23  | 0.516 | 1.620 | 0.025 | 0.075 |
| GO_REGULATION_OF_JUN_KINASE_ACTIVITY                           | 78  | 0.429 | 1.620 | 0.014 | 0.075 |
| GO_CARGO_RECEPTOR_ACTIVITY                                     | 60  | 0.450 | 1.619 | 0.031 | 0.075 |
| GO_CALCIUM_ACTIVATED_CHANNEL_ACTIVITY                          | 27  | 0.500 | 1.619 | 0.020 | 0.076 |
| GO_REGULATION_OF_NOREPINEPHRINE_SECRETION                      | 17  | 0.590 | 1.619 | 0.014 | 0.076 |
| GO_NEGATIVE_REGULATION_OF_MUSCLE_CONTRACTION                   | 21  | 0.550 | 1.619 | 0.020 | 0.076 |
| GO_POSITIVE_REGULATION_OF_RECEPTOR_MEDIATED_ENDOCYTOSIS        | 47  | 0.440 | 1.618 | 0.008 | 0.076 |
| GO_BRANCH_ELONGATION_OF_AN_EPITHELIUM                          | 17  | 0.565 | 1.617 | 0.025 | 0.076 |
| GO_CELLULAR_RESPONSE_TO_PH                                     | 16  | 0.530 | 1.616 | 0.018 | 0.077 |
| GO_ANCHORING_JUNCTION                                          | 474 | 0.371 | 1.616 | 0.021 | 0.077 |
| GO_NEGATIVE_REGULATION_OF_ENDOTHELIAL_CELL_APOPTOTIC_PROCESSES | 27  | 0.544 | 1.616 | 0.033 | 0.076 |
| GO_ASSOCIATIVE_LEARNING                                        | 70  | 0.424 | 1.616 | 0.012 | 0.076 |
| GO_NEGATIVE_REGULATION_OF_CELL_ACTIVATION                      | 149 | 0.433 | 1.616 | 0.033 | 0.076 |
| GO_DOPAMINE_RECEPTOR_SIGNALING_PATHWAY                         | 28  | 0.494 | 1.616 | 0.022 | 0.077 |
| GO_CILIARY_BASE                                                | 22  | 0.511 | 1.616 | 0.040 | 0.077 |
| GO_TRANSFORMING_GROWTH_FACTOR_BETA_RECEPTOR_SIGNALING_PATHWAY  | 94  | 0.406 | 1.615 | 0.012 | 0.077 |
| GO_CALMODULIN_BINDING                                          | 177 | 0.381 | 1.615 | 0.008 | 0.077 |
| GO_NEURON_PROJECTION_EXTENSION                                 | 52  | 0.471 | 1.615 | 0.043 | 0.077 |
| GO_OLIGODENDROCYTE_DIFFERENTIATION                             | 57  | 0.430 | 1.614 | 0.012 | 0.077 |
| GO_PLASMA_MEMBRANE_RECEPTOR_COMPLEX                            | 173 | 0.392 | 1.613 | 0.018 | 0.077 |
| GO_VOLTAGE_GATED_CALCIUM_CHANNEL_COMPLEX                       | 38  | 0.509 | 1.612 | 0.025 | 0.078 |
| GO_REGULATION_OF_ORGANIC_ACID_TRANSPORT                        | 48  | 0.422 | 1.612 | 0.013 | 0.078 |
| GO_REGULATION_OF_CAMP_MEDIATED                                 | 23  | 0.536 | 1.611 | 0.026 | 0.078 |

---

|                                                                                     |     |       |       |       |       |
|-------------------------------------------------------------------------------------|-----|-------|-------|-------|-------|
| D_SIGNALING                                                                         |     |       |       |       |       |
| GO_CARDIAC_MUSCLE_CELL_DIFFERENTIATION                                              | 72  | 0.417 | 1.611 | 0.018 | 0.078 |
| GO_NEGATIVE_REGULATION_OF_GLU<br>COSE_TRANSPORT                                     | 16  | 0.559 | 1.611 | 0.035 | 0.079 |
| GO_NEGATIVE_REGULATION_OF_TUMOR_NECROSIS_FACTOR_SUPERFAMILY<br>_CYTOKINE_PRODUCTION | 41  | 0.493 | 1.610 | 0.033 | 0.079 |
| GO_LYMPHOCYTE_DIFFERENTIATION                                                       | 194 | 0.439 | 1.610 | 0.055 | 0.079 |
| GO_CELLULAR_RESPONSE_TO_PROSTAGLANDIN_E_STIMULUS                                    | 18  | 0.556 | 1.609 | 0.026 | 0.079 |
| GO_HMG_BOX_DOMAIN_BINDING                                                           | 18  | 0.549 | 1.609 | 0.029 | 0.079 |
| GO_SEMAPHORIN_RECEPTOR_BINDING                                                      | 22  | 0.531 | 1.609 | 0.024 | 0.079 |
| GO_KINASE_INHIBITOR_ACTIVITY                                                        | 86  | 0.391 | 1.609 | 0.002 | 0.079 |
| GO_NEGATIVE_REGULATION_OF_ADHERENS_JUNCTION_ORGANIZATION                            | 15  | 0.629 | 1.608 | 0.034 | 0.080 |
| GO_EMBRYONIC_ORGAN_DEVELOPMENT                                                      | 398 | 0.349 | 1.607 | 0.004 | 0.080 |
| GO_NEGATIVE_REGULATION_OF_SMOOTH_MUSCLE_CONTRACTION                                 | 15  | 0.598 | 1.606 | 0.030 | 0.080 |
| GO_REGULATION_OF_NEUTROPHIL_CHEMOTAXIS                                              | 25  | 0.563 | 1.606 | 0.057 | 0.080 |
| GO_HEAD_MORPHOGENESIS                                                               | 35  | 0.495 | 1.605 | 0.035 | 0.081 |
| GO_DENDRITIC_CELL_DIFFERENTIATION                                                   | 32  | 0.556 | 1.605 | 0.047 | 0.081 |
| GO_NEGATIVE_REGULATION_OF_LYMPHOCYTE_DIFFERENTIATION                                | 37  | 0.467 | 1.605 | 0.032 | 0.081 |
| GO_STEROID_HORMONE_RECEPTOR_ACTIVITY                                                | 58  | 0.432 | 1.605 | 0.008 | 0.081 |
| GO_NEGATIVE_REGULATION_OF_AUTO<br>PHAGY                                             | 51  | 0.419 | 1.604 | 0.013 | 0.081 |
| GO_REGULATION_OF_ACTION_POTENTIAL                                                   | 36  | 0.465 | 1.604 | 0.035 | 0.081 |
| GO_MACROPHAGE_ACTIVATION                                                            | 31  | 0.540 | 1.603 | 0.035 | 0.081 |
| GO_REGULATION_OF_NEUROBLAST_PROLIFERATION                                           | 27  | 0.477 | 1.603 | 0.015 | 0.081 |
| GO_CELL_MIGRATION_INVOLVED_IN_SPROUTING_ANGIOGENESIS                                | 15  | 0.643 | 1.603 | 0.028 | 0.081 |
| GO_REGULATION_OF_EXTRACELLULAR_MATRIX_ORGANIZATION                                  | 26  | 0.510 | 1.603 | 0.030 | 0.081 |
| GO_G_PROTEIN_COUPLED_PURINERGIC_RECEPTOR_SIGNALING_PATHWAY                          | 19  | 0.609 | 1.603 | 0.045 | 0.081 |
| GO_OLIGODENDROCYTE_DEVELOPMENT                                                      | 32  | 0.459 | 1.602 | 0.016 | 0.081 |

|                                                                     |     |       |       |        |       |
|---------------------------------------------------------------------|-----|-------|-------|--------|-------|
| NT                                                                  |     |       |       |        |       |
| GO_HEART_VALVE_DEVELOPMENT                                          | 32  | 0.495 | 1.601 | 0.020  | 0.082 |
| GO_CELLULAR_RESPONSE_TO_CARBOHYDRATE_STIMULUS                       | 70  | 0.422 | 1.601 | 0.027  | 0.082 |
| GO_NEGATIVE_REGULATION_OF_DEFENSE_RESPONSE                          | 133 | 0.426 | 1.600 | 0.032  | 0.082 |
| GO_NEGATIVE_REGULATION_OF_HEART_CONTRACTION                         | 19  | 0.540 | 1.600 | 0.031  | 0.083 |
| GO_SECRETORY_GRANULE                                                | 334 | 0.347 | 1.599 | 0.006  | 0.083 |
| GO_CELL_JUNCTION_ASSEMBLY                                           | 126 | 0.417 | 1.599 | 0.024  | 0.083 |
| GO_CARBOXYPEPTIDASE_ACTIVITY                                        | 37  | 0.466 | 1.598 | 0.028  | 0.083 |
| GO_SMOOTH_MUSCLE_TISSUE_DEVELOPMENT                                 | 18  | 0.569 | 1.598 | 0.040  | 0.083 |
| GO_REGULATION_OF_PROTEIN_IMPORT                                     | 177 | 0.359 | 1.597 | 0.004  | 0.083 |
| GO_NEGATIVE_REGULATION_OF_AXON_GUIDANCE                             | 27  | 0.510 | 1.597 | 0.037  | 0.084 |
| GO_PLASMA_MEMBRANE_ORGANIZATION                                     | 201 | 0.344 | 1.596 | 0.014  | 0.084 |
| GO_ACTIN_FILAMENT_BINDING                                           | 115 | 0.385 | 1.595 | 0.012  | 0.084 |
| GO_REGULATION_OF_LONG_TERM_SYNAPTIC_POTENTIATION                    | 19  | 0.541 | 1.595 | 0.044  | 0.084 |
| GO_SYNAPSE_ASSEMBLY                                                 | 68  | 0.459 | 1.595 | 0.049  | 0.084 |
| GO_POSITIVE_T_CELL_SELECTION                                        | 21  | 0.625 | 1.595 | 0.063  | 0.084 |
| GO_NEUROPEPTIDE_SIGNALING_PATHWAY                                   | 88  | 0.442 | 1.594 | 0.010  | 0.085 |
| GO_NEGATIVE_REGULATION_OF_PHOSPHORYLATION                           | 409 | 0.322 | 1.594 | <0.001 | 0.085 |
| GO_POSITIVE_REGULATION_OF_LIPID_METABOLIC_PROCESS                   | 122 | 0.395 | 1.594 | 0.010  | 0.085 |
| GO_RESPONSE_TO_STEROID_HORMONE                                      | 485 | 0.316 | 1.594 | <0.001 | 0.085 |
| GO_ENDOCYTIC_VESICLE_MEMBRANE                                       | 148 | 0.399 | 1.594 | 0.036  | 0.085 |
| GO_POSITIVE_REGULATION_OF_TYROSINE_PHOSPHORYLATION_OF_STAT3_PROTEIN | 36  | 0.470 | 1.593 | 0.028  | 0.085 |
| GO_REGULATION_OF_VOLTAGE_GATED_CALCIIUM_CHANNEL_ACTIVITY            | 24  | 0.498 | 1.593 | 0.042  | 0.085 |
| GO_EPITHELIAL_TUBE_BRANCHING_INVOLVED_IN_LUNG_MORPHOGENESIS         | 25  | 0.510 | 1.593 | 0.023  | 0.085 |
| GO_SENSORY_ORGAN_MORPHOGENESIS                                      | 233 | 0.368 | 1.592 | 0.013  | 0.085 |
| GO_VOLTAGE_GATED_CALCIIUM_CHANNEL                                   | 42  | 0.505 | 1.591 | 0.030  | 0.086 |

| NNEL_ACTIVITY                                                       |     |       |       |       |       |
|---------------------------------------------------------------------|-----|-------|-------|-------|-------|
| GO_SPECIFICATION_OF_SYMMETRY                                        | 112 | 0.396 | 1.591 | 0.006 | 0.086 |
| GO_CARDIAC_MUSCLE_TISSUE_MORPHOGENESIS                              | 52  | 0.416 | 1.591 | 0.015 | 0.086 |
| GO_REGULATION_OF_ACTIN_CYTOSKELETON_REORGANIZATION                  | 31  | 0.497 | 1.590 | 0.041 | 0.086 |
| GO_SULFURIC_ESTER_HYDROLASE_ACTIVITY                                | 17  | 0.572 | 1.589 | 0.041 | 0.086 |
| GO_CELL_FATE_DETERMINATION                                          | 43  | 0.455 | 1.589 | 0.030 | 0.086 |
| GO_POSITIVE_REGULATION_OF_ADHERENS_JUNCTION_ORGANIZATION            | 21  | 0.500 | 1.589 | 0.026 | 0.087 |
| GO_NEGATIVE_REGULATION_OF_JNK_CASCADE                               | 32  | 0.454 | 1.588 | 0.018 | 0.087 |
| GO_REGULATION_OF_MACROPHAGE_CHEMOTAXIS                              | 16  | 0.639 | 1.588 | 0.049 | 0.087 |
| GO_TRANSMEMBRANE_RECEPTOR_PROTEIN_TYROSINE_KINASE_SIGNALING_PATHWAY | 489 | 0.327 | 1.588 | 0.004 | 0.087 |
| GO_EPITHELIAL_TO_MESENCHYMAL_TRANSITION                             | 55  | 0.447 | 1.588 | 0.039 | 0.087 |
| GO_REGULATION_OF_PROTEIN_SECRETION                                  | 369 | 0.340 | 1.588 | 0.009 | 0.087 |
| GO_BROWN_FAT_CELL_DIFFERENTIATION                                   | 28  | 0.490 | 1.587 | 0.033 | 0.087 |
| GO_NEGATIVE_REGULATION_OF_STRIATED_MUSCLE_CELL_APOPTOTIC_PROCESS    | 17  | 0.549 | 1.587 | 0.038 | 0.087 |
| GO_REGULATION_OF_JNK_CASCADE                                        | 155 | 0.367 | 1.586 | 0.008 | 0.087 |
| GO_POSITIVE_REGULATION_OF_VASODILATION                              | 29  | 0.500 | 1.586 | 0.039 | 0.088 |
| GO_POSITIVE_REGULATION_OF_NUCLEOSIDE_METABOLIC_PROCESS              | 22  | 0.498 | 1.585 | 0.028 | 0.088 |
| GO_REGULATION_OF_LIPOPOLYSACCHARIDE_MEDIATED_SIGNALING_PATHWAY      | 16  | 0.552 | 1.584 | 0.052 | 0.089 |
| GO_EXCRETION                                                        | 44  | 0.457 | 1.582 | 0.016 | 0.089 |
| GO_MYELOID_LEUKOCYTE_DIFFERENTIATION                                | 93  | 0.407 | 1.582 | 0.023 | 0.090 |
| GO_CARDIAC_CELL_DEVELOPMENT                                         | 47  | 0.458 | 1.582 | 0.033 | 0.090 |
| GO_ARF_GUANYL_NUCLEOTIDE_EXCHANGE_FACTOR_ACTIVITY                   | 23  | 0.520 | 1.581 | 0.031 | 0.090 |
| GO_VISUAL_BEHAVIOR                                                  | 48  | 0.423 | 1.581 | 0.023 | 0.090 |
| GO_NEGATIVE_REGULATION_OF_BLOOD_CIRCULATION                         | 32  | 0.485 | 1.581 | 0.028 | 0.090 |

|                                                                        |     |       |       |        |       |
|------------------------------------------------------------------------|-----|-------|-------|--------|-------|
| GO_M_BAND                                                              | 20  | 0.518 | 1.581 | 0.040  | 0.090 |
| GO_ENDOCHONDRAL_BONE_MORPHOGENESIS                                     | 44  | 0.473 | 1.580 | 0.035  | 0.090 |
| GO_NEGATIVE_REGULATION_OF_ESTABLISHMENT_OF_PROTEIN_LOCALIZATION        | 197 | 0.336 | 1.580 | <0.001 | 0.090 |
| GO_PERIPHERAL_NERVOUS_SYSTEM_AXON_ENSHEATHMENT                         | 21  | 0.525 | 1.579 | 0.025  | 0.090 |
| GO_MESENCHYMAL_TO_EPITHELIAL_TRANSITION                                | 15  | 0.578 | 1.579 | 0.030  | 0.091 |
| GO_SKELETAL_MUSCLE_CELL_DIFFERENTIATION                                | 49  | 0.454 | 1.578 | 0.025  | 0.091 |
| GO_EXTRINSIC_COMPONENT_OF_PLASMA_MEMBRANE                              | 132 | 0.373 | 1.578 | 0.024  | 0.091 |
| GO_NEGATIVE_REGULATION_OF_ALPHA_BETA_T_CELL_DIFFERENTIATION            | 15  | 0.568 | 1.578 | 0.035  | 0.091 |
| GO_POSITIVE_REGULATION_OF_PROTEIN_MATURATION                           | 16  | 0.526 | 1.576 | 0.023  | 0.092 |
| GO_SPINAL_CORD_DEVELOPMENT                                             | 103 | 0.416 | 1.576 | 0.021  | 0.092 |
| GO_NERVE_DEVELOPMENT                                                   | 66  | 0.422 | 1.575 | 0.034  | 0.092 |
| GO_VENTRAL_SPINAL_CORD_INTERNEURON_DIFFERENTIATION                     | 17  | 0.589 | 1.575 | 0.037  | 0.092 |
| GO_RESPONSE_TO_AMINO_ACID                                              | 107 | 0.365 | 1.575 | 0.014  | 0.093 |
| GO_REGULATION_OF_WOUND_HEALING                                         | 123 | 0.414 | 1.574 | 0.018  | 0.093 |
| GO_CORTICAL_CYTOSKELETON                                               | 79  | 0.405 | 1.574 | 0.022  | 0.093 |
| GO_REGULATION_OF_TUMOR_NECROSIS_FACTOR_SUPERFAMILY_CYTOKINE_PRODUCTION | 98  | 0.445 | 1.574 | 0.048  | 0.093 |
| GO_MYOTUBE_DIFFERENTIATION                                             | 50  | 0.442 | 1.573 | 0.023  | 0.093 |
| GO_NEGATIVE_REGULATION_OF_INTRACELLULAR_PROTEIN_TRANSPORT              | 92  | 0.366 | 1.573 | 0.004  | 0.093 |
| GO_MONOOXYGENASE_ACTIVITY                                              | 92  | 0.407 | 1.573 | 0.026  | 0.093 |
| GO_REGULATION_OF_TYROSINE_PHOSPHORYLATION_OF_STAT_PROTEIN              | 65  | 0.427 | 1.573 | 0.019  | 0.093 |
| GO_NEGATIVE_REGULATION_OF_REACTIVE_OXYGEN_SPECIES_BIOSYNTHETIC_PROCESS | 16  | 0.557 | 1.573 | 0.028  | 0.093 |
| GO_LIPID_PHOSPHORYLATION                                               | 96  | 0.379 | 1.572 | 0.016  | 0.093 |
| GO_POSITIVE_REGULATION_OF_CALCIIUM_MEDIATED_SIGNALING                  | 38  | 0.468 | 1.572 | 0.040  | 0.093 |
| GO_POSITIVE_REGULATION_OF_ALCOHOL_BIOSYNTHETIC_PROCESS                 | 22  | 0.509 | 1.572 | 0.030  | 0.093 |
| GO_REGULATION_OF_THE_FORCE_OF_                                         | 28  | 0.480 | 1.572 | 0.033  | 0.093 |

---

|                                                                  |     |       |       |       |       |
|------------------------------------------------------------------|-----|-------|-------|-------|-------|
| HEART_CONTRACTION                                                |     |       |       |       |       |
| GO_CELLULAR_EXTRAVASATION                                        | 24  | 0.594 | 1.571 | 0.052 | 0.094 |
| GO_REGULATION_OF_VASODILATION                                    | 44  | 0.461 | 1.571 | 0.020 | 0.094 |
| GO_BONE_MORPHOGENESIS                                            | 78  | 0.435 | 1.570 | 0.036 | 0.094 |
| GO_TISSUE_REGENERATION                                           | 48  | 0.429 | 1.570 | 0.035 | 0.094 |
| GO_CALCIUM_CHANNEL_COMPLEX                                       | 56  | 0.452 | 1.569 | 0.027 | 0.094 |
| GO_RECEPTOR_MEDIATED_ENDOCYTOSIS                                 | 202 | 0.379 | 1.569 | 0.022 | 0.095 |
| GO_CD4_POSITIVE_ALPHA_BETA_T_CELL_ACTIVATION                     | 34  | 0.486 | 1.569 | 0.045 | 0.095 |
| GO_CELL_AGGREGATION                                              | 20  | 0.538 | 1.568 | 0.029 | 0.095 |
| GO_NEUROTROPHIN_SIGNALING_PATHWAY                                | 23  | 0.520 | 1.568 | 0.049 | 0.095 |
| GO_RECEPTOR_METABOLIC_PROCESS                                    | 77  | 0.402 | 1.568 | 0.016 | 0.095 |
| GO_ACTIN_FILAMENT                                                | 67  | 0.417 | 1.568 | 0.032 | 0.095 |
| GO_REGULATION_OF_MONONUCLEAR_CELL_MIGRATION                      | 16  | 0.629 | 1.568 | 0.048 | 0.095 |
| GO_PERIPHERAL_NERVOUS_SYSTEM_DEVELOPMENT                         | 64  | 0.414 | 1.567 | 0.006 | 0.095 |
| GO_REGULATION_OF_CYTOKINE_PRODUCTION_INVOLVED_IN_IMMUNE_RESPONSE | 54  | 0.470 | 1.566 | 0.072 | 0.096 |
| GO_NEGATIVE_REGULATION_OF_PEP-TIDE_SECRETION                     | 46  | 0.420 | 1.566 | 0.027 | 0.095 |
| GO_MYOBLAST_DIFFERENTIATION                                      | 37  | 0.467 | 1.566 | 0.038 | 0.096 |
| GO_RNA_POLYMERASE_II_TRANSCRIPTION_COACTIVATOR_ACTIVITY          | 35  | 0.495 | 1.564 | 0.015 | 0.096 |
| GO_MIDDLE_EAR_MORPHOGENESIS                                      | 20  | 0.525 | 1.564 | 0.051 | 0.096 |
| GO_SIGNALING_ADAPTOR_ACTIVITY                                    | 73  | 0.426 | 1.564 | 0.040 | 0.096 |
| GO_RESPONSE_TO_ALCOHOL                                           | 358 | 0.322 | 1.564 | 0.006 | 0.096 |
| GO_REGULATION_OF_CELL_ACTIVATION                                 | 443 | 0.393 | 1.564 | 0.062 | 0.096 |
| GO_FACE_DEVELOPMENT                                              | 49  | 0.446 | 1.564 | 0.022 | 0.096 |
| GO_CARBOHYDRATE_DERIVATIVE_CATABOLIC_PROCESS                     | 168 | 0.338 | 1.564 | 0.007 | 0.096 |
| GO_INFLAMMATORY_RESPONSE                                         | 431 | 0.404 | 1.563 | 0.042 | 0.096 |
| GO_LUNG_MORPHOGENESIS                                            | 45  | 0.437 | 1.563 | 0.028 | 0.096 |
| GO_CHANNEL_INHIBITOR_ACTIVITY                                    | 34  | 0.426 | 1.563 | 0.021 | 0.096 |
| GO_REGULATION_OF_CGMP_METABOLIC_PROCESS                          | 28  | 0.481 | 1.563 | 0.030 | 0.096 |
| GO_RECEPTOR_AGONIST_ACTIVITY                                     | 16  | 0.547 | 1.563 | 0.033 | 0.096 |
| GO_REGULATION_OF_INTERLEUKIN_17_PRODUCTION                       | 22  | 0.589 | 1.563 | 0.066 | 0.096 |
| GO_LIGAND_GATED_CALCIUM_CHANNEL                                  | 16  | 0.584 | 1.562 | 0.063 | 0.097 |

---

|                                                                      |     |       |       |       |       |
|----------------------------------------------------------------------|-----|-------|-------|-------|-------|
| NEL_ACTIVITY                                                         |     |       |       |       |       |
| GO_MULTI_MULTICELLULAR_ORGANISM_PROCESS                              | 207 | 0.360 | 1.562 | 0.004 | 0.097 |
| GO_NEGATIVE_REGULATION_OF_HOMEOSTATIC_PROCESS                        | 122 | 0.378 | 1.562 | 0.026 | 0.097 |
| GO_REGULATION_OF_MUSCLE_HYPERTROPHY                                  | 36  | 0.456 | 1.561 | 0.023 | 0.097 |
| GO_POSITIVE_REGULATION_OF_CARBONHYDRATE_METABOLIC_PROCESS            | 68  | 0.380 | 1.561 | 0.006 | 0.097 |
| GO_GABA_RECEPTOR_BINDING                                             | 15  | 0.543 | 1.561 | 0.044 | 0.097 |
| GO_LEUKOCYTE_MIGRATION                                               | 254 | 0.404 | 1.560 | 0.049 | 0.097 |
| GO_JNK_CASCADE                                                       | 79  | 0.380 | 1.560 | 0.017 | 0.097 |
| GO_ENDODERM_FORMATION                                                | 50  | 0.454 | 1.559 | 0.043 | 0.098 |
| GO_PODOSOME                                                          | 23  | 0.517 | 1.559 | 0.067 | 0.098 |
| GO_HEMATOPOIETIC_PROGENITOR_CELL_DIFFERENTIATION                     | 95  | 0.373 | 1.559 | 0.020 | 0.098 |
| GO_TELENCEPHALON_DEVELOPMENT                                         | 225 | 0.346 | 1.558 | 0.016 | 0.098 |
| GO_REGULATION_OF_INTERLEUKIN_1_BETA_PRODUCTION                       | 46  | 0.486 | 1.558 | 0.044 | 0.098 |
| GO_MAST_CELL_GRANULE                                                 | 21  | 0.551 | 1.558 | 0.065 | 0.098 |
| GO_REGULATION_OF_LEUKOCYTE_DIFFERENTIATION                           | 218 | 0.385 | 1.557 | 0.048 | 0.098 |
| GO_SARCOMERE_ORGANIZATION                                            | 25  | 0.526 | 1.557 | 0.065 | 0.098 |
| GO_CARDIAC_MYOFIBRIL_ASSEMBLY                                        | 16  | 0.586 | 1.557 | 0.047 | 0.098 |
| GO_POSITIVE_REGULATION_OF_TRANSFORMING_GROWTH_FACTOR_BETA_PRODUCTION | 16  | 0.547 | 1.557 | 0.056 | 0.098 |
| GO_POSITIVE_REGULATION_OF_RECEPTOR_ACTIVITY                          | 44  | 0.399 | 1.556 | 0.014 | 0.099 |
| GO_REGULATION_OF_STRIATED_MUSCLE_CELL_APOPTOTIC_PROCESS              | 21  | 0.513 | 1.556 | 0.045 | 0.099 |
| GO_CYTOKINE_RECEPTOR_BINDING                                         | 243 | 0.361 | 1.556 | 0.012 | 0.099 |
| GO_CYTOPLASMIC_SIDE_OF_MEMBRANE                                      | 166 | 0.361 | 1.555 | 0.030 | 0.099 |
| GO_EAR_MORPHOGENESIS                                                 | 111 | 0.383 | 1.555 | 0.023 | 0.099 |
| GO_MAMMARY_GLAND_MORPHOGENESIS                                       | 40  | 0.454 | 1.555 | 0.036 | 0.099 |
| GO_MUSCLE_ADAPTATION                                                 | 29  | 0.457 | 1.554 | 0.038 | 0.099 |
| GO_ADAPTATION_OF_SIGNALING_PATHWAY                                   | 20  | 0.508 | 1.554 | 0.042 | 0.099 |
| GO_LAMININ_BINDING                                                   | 29  | 0.504 | 1.554 | 0.036 | 0.099 |
| GO_REGULATION_OF_LYMPHOCYTE_DIFFERENTIATION                          | 125 | 0.423 | 1.553 | 0.070 | 0.100 |
| GO_POSITIVE_REGULATION_OF_HEARING                                    | 35  | 0.430 | 1.553 | 0.016 | 0.100 |

---

|                                                                             |     |       |       |       |       |
|-----------------------------------------------------------------------------|-----|-------|-------|-------|-------|
| T_CONTRACTION                                                               |     |       |       |       |       |
| GO_GLOMERULAR_EPITHELIUM_DEVELOPMENT                                        | 19  | 0.523 | 1.553 | 0.038 | 0.100 |
| GO_NEGATIVE_REGULATION_OF_MACROAUTOPHAGY                                    | 20  | 0.465 | 1.551 | 0.031 | 0.101 |
| GO_DETECTION_OF_MECHANICAL_STIMULUS_INVOLVED_IN_SENSORY_PERCEPTION          | 23  | 0.511 | 1.551 | 0.044 | 0.101 |
| GO_NEGATIVE_REGULATION_OF_TISSUE_REMODELING                                 | 17  | 0.546 | 1.550 | 0.033 | 0.101 |
| GO_REGULATION_OF_PHAGOCYTOSIS                                               | 67  | 0.425 | 1.550 | 0.033 | 0.101 |
| GO_REGULATION_OF_CARDIAC_MUSCLE_CELL_CONTRACTION                            | 27  | 0.473 | 1.548 | 0.049 | 0.102 |
| GO_CHEMOATTRACTANT_ACTIVITY                                                 | 26  | 0.507 | 1.548 | 0.038 | 0.102 |
| GO_TRANSMITTER_GATED_CHANNEL_ACTIVITY                                       | 26  | 0.529 | 1.548 | 0.042 | 0.103 |
| GO_SEMAPHORIN_PLEXIN_SIGNALING_PATHWAY                                      | 36  | 0.477 | 1.547 | 0.054 | 0.103 |
| GO_NEGATIVE_REGULATION_OF_EPITHELIAL_CELL_APOPTOTIC_PROCESS                 | 35  | 0.484 | 1.546 | 0.025 | 0.104 |
| GO_NEGATIVE_REGULATION_OF_PROTEIN_MATURATION                                | 35  | 0.435 | 1.546 | 0.038 | 0.104 |
| GO_POSITIVE_REGULATION_OF_STRESS_ACTIVATED_PROTEIN_KINASE_SIGNALING_CASCADE | 132 | 0.367 | 1.545 | 0.012 | 0.104 |
| GO_THYMIC_T_CELL_SELECTION                                                  | 19  | 0.594 | 1.545 | 0.075 | 0.104 |
| GO_PURINERGIC_NUCLEOTIDE_RECEPTOR_SIGNALING_PATHWAY                         | 22  | 0.560 | 1.545 | 0.057 | 0.104 |
| GO_REGULATION_OF_POTASSIUM_ION_TRANSMEMBRANE_TRANSPORT                      | 59  | 0.425 | 1.545 | 0.040 | 0.104 |
| GO_NEURON_MATURATION                                                        | 30  | 0.464 | 1.545 | 0.046 | 0.104 |
| GO_REGULATION_OF_FATTY_ACID_BETA_OXIDATION                                  | 15  | 0.545 | 1.544 | 0.060 | 0.104 |
| GO_REGULATION_OF_Glutamate_Secretion                                        | 15  | 0.557 | 1.544 | 0.049 | 0.104 |
| GO_CELLULAR_RESPONSE_TO_NITROGEN_COMPOUND                                   | 481 | 0.314 | 1.542 | 0.004 | 0.105 |
| GO_OVULATION_CYCLE_PROCESS                                                  | 85  | 0.366 | 1.542 | 0.006 | 0.105 |
| GO_HOMOTYPIC_CELL_CELL_ADHESION                                             | 49  | 0.434 | 1.542 | 0.047 | 0.105 |
| GO_REGULATION_OF_HEAT_GENERATION                                            | 15  | 0.572 | 1.542 | 0.060 | 0.105 |
| GO_NEUROEPITHELIAL_CELL_DIFFERENTIATION                                     | 60  | 0.390 | 1.541 | 0.031 | 0.106 |



---

|                                                                                                 |     |       |       |       |       |
|-------------------------------------------------------------------------------------------------|-----|-------|-------|-------|-------|
| GO_TRANSCRIPTIONAL_REPRESSOR_ACTIVITY_RNA_POLYMERASE_II_ACTIVATING_TRANSCRIPTION_FACTOR_BINDING | 51  | 0.440 | 1.541 | 0.027 | 0.106 |
| GO_CELLULAR_RESPONSE_TO_CALCIIUM_ION                                                            | 46  | 0.426 | 1.541 | 0.035 | 0.106 |
| GO_REGULATION_OF_OSTEOCLAST_DIFFERENTIATION                                                     | 59  | 0.438 | 1.541 | 0.048 | 0.106 |
| GO_ACTIVIN_RECEPTOR_SIGNALING_PATHWAY                                                           | 20  | 0.518 | 1.541 | 0.039 | 0.105 |
| GO_REGULATION_OF_MESENCHYMAL_CELL_PROLIFERATION                                                 | 34  | 0.481 | 1.540 | 0.028 | 0.105 |
| GO_REGULATION_OF_INTERLEUKIN_4_PRODUCTION                                                       | 29  | 0.526 | 1.540 | 0.096 | 0.105 |
| GO_FOREBRAIN_DEVELOPMENT                                                                        | 352 | 0.345 | 1.540 | 0.015 | 0.105 |
| GO_NEGATIVE_REGULATION_OF_CELL_ADHESION                                                         | 211 | 0.353 | 1.539 | 0.029 | 0.106 |
| GO_FILOPODIUM                                                                                   | 89  | 0.375 | 1.539 | 0.046 | 0.106 |
| GO_OLFACTORY_LOBE_DEVELOPMENT                                                                   | 36  | 0.446 | 1.538 | 0.023 | 0.107 |
| GO_NEGATIVE_REGULATION_OF_CARDIAC_MUSCLE_TISSUE_DEVELOPMENT                                     | 17  | 0.525 | 1.536 | 0.045 | 0.108 |
| GO_POSITIVE_REGULATION_OF_LEUKOCYTE_CHEMOTAXIS                                                  | 79  | 0.451 | 1.536 | 0.064 | 0.108 |
| GO_AXON                                                                                         | 398 | 0.341 | 1.536 | 0.020 | 0.108 |
| GO_CALCIIUM_DEPENDENT_CELL_CELL_ADHESION_VIA_PLASMA_MEMBRANE_CELL_ADHESION_MOLECULES            | 26  | 0.531 | 1.536 | 0.066 | 0.108 |
| GO_HUMORAL_IMMUNE_RESPONSE_MEDIATED_BY_CIRCULATING_IMMUNOGLOBULIN                               | 38  | 0.506 | 1.535 | 0.062 | 0.108 |
| GO_POSITIVE_REGULATION_OF_LYMPHOCYTE_DIFFERENTIATION                                            | 76  | 0.450 | 1.534 | 0.071 | 0.108 |
| GO_POSITIVE_REGULATION_OF_SODIUM_ION_TRANSPORT                                                  | 33  | 0.459 | 1.534 | 0.045 | 0.109 |
| GO_RENAL_WATER_HOMEOSTASIS                                                                      | 34  | 0.449 | 1.534 | 0.041 | 0.109 |
| GO_EPHRIN_RECEPTOR_ACTIVITY                                                                     | 19  | 0.508 | 1.534 | 0.040 | 0.109 |
| GO_NEGATIVE_REGULATION_OF_IMMUNE_SYSTEM_PROCESS                                                 | 353 | 0.359 | 1.533 | 0.044 | 0.109 |
| GO_MEMBRANE_INVAGINATION                                                                        | 29  | 0.493 | 1.532 | 0.047 | 0.109 |
| GO_PROTEIN_LOCALIZATION_TO_SYNAPSE                                                              | 15  | 0.582 | 1.532 | 0.078 | 0.109 |
| GO_REGULATION_OF_HEART_GROWTH                                                                   | 41  | 0.424 | 1.532 | 0.027 | 0.109 |

---

| H                                                                         |     |       |       |       |       |
|---------------------------------------------------------------------------|-----|-------|-------|-------|-------|
| GO_REGULATION_OF_PROTEIN_SERINE_THREONINE_KINASE_ACTIVITY                 | 458 | 0.309 | 1.532 | 0.004 | 0.109 |
| GO_REGULATION_OF_GLUCOSE_IMPORT_IN_RESPONSE_TO_INSULIN_STIMULUS           | 16  | 0.550 | 1.532 | 0.051 | 0.109 |
| GO_SCHWANN_CELL_DEVELOPMENT                                               | 25  | 0.494 | 1.531 | 0.040 | 0.110 |
| GO_PROTEIN_KINASE_B_SIGNALING                                             | 34  | 0.455 | 1.531 | 0.042 | 0.110 |
| GO_REGULATION_OF_CHOLESTEROL_EFFLUX                                       | 20  | 0.510 | 1.530 | 0.041 | 0.110 |
| GO_MRNA_TRANSCRIPTION_FROM_RNAPOLYMERASE_II_PROMOTER                      | 15  | 0.534 | 1.530 | 0.050 | 0.110 |
| GO_REGULATION_OF_STRESS_ACTIVATED_PROTEIN_KINASE_SIGNALING_CASCADE        | 193 | 0.334 | 1.530 | 0.008 | 0.110 |
| GO_POLYSACCHARIDE_BIOSYNTHETIC_PROCESS                                    | 41  | 0.432 | 1.530 | 0.053 | 0.110 |
| GO_G_PROTEIN_COUPLED_AMINE_RECEPTOR_ACTIVITY                              | 41  | 0.474 | 1.530 | 0.051 | 0.110 |
| GO_METANEPHRIC_NEPHRON_MORPHOGENESIS                                      | 21  | 0.504 | 1.528 | 0.031 | 0.111 |
| GO_REGULATION_OF_NEURAL_PRESORSOR_CELL_PROLIFERATION                      | 70  | 0.394 | 1.528 | 0.034 | 0.111 |
| GO_METAL_ION_TRANSMEMBRANETRANSPORTER_ACTIVITY                            | 403 | 0.345 | 1.527 | 0.017 | 0.112 |
| GO_POSITIVE_REGULATION_OF_EPITHELIAL_TO_MESENCHYMAL_TRANSITION            | 33  | 0.448 | 1.527 | 0.053 | 0.111 |
| GO_INTRINSIC_COMPONENT_OF_GOLGI_MEMBRANE                                  | 52  | 0.404 | 1.526 | 0.038 | 0.112 |
| GO_NEGATIVE_REGULATION_OF_CYTOKINE_PRODUCTION_INVOLVED_IN_IMMUNE_RESPONSE | 19  | 0.585 | 1.526 | 0.066 | 0.112 |
| GO_METANEPHROS_MORPHOGENESIS                                              | 28  | 0.474 | 1.525 | 0.052 | 0.113 |
| GO_CHEMOKINE_BINDING                                                      | 17  | 0.608 | 1.525 | 0.084 | 0.113 |
| GO_REGULATION_OF_RECEPTOR_MEDIATED_ENDOCYTOSIS                            | 78  | 0.376 | 1.524 | 0.018 | 0.113 |
| GO_MAST_CELL_ACTIVATION                                                   | 21  | 0.543 | 1.524 | 0.079 | 0.113 |
| GO_SODIUM_CHANNEL_REGULATOR_ACTIVITY                                      | 32  | 0.422 | 1.523 | 0.043 | 0.114 |
| GO_MYOFILAMENT                                                            | 23  | 0.496 | 1.523 | 0.076 | 0.114 |
| GO_REGULATION_OF_MUSCLE_ADAPTATION                                        | 61  | 0.399 | 1.522 | 0.035 | 0.114 |
| GO_NEGATIVE_REGULATION_OF_CELL                                            | 19  | 0.534 | 1.521 | 0.063 | 0.115 |

---

|                                                                                                            |     |       |       |       |       |
|------------------------------------------------------------------------------------------------------------|-----|-------|-------|-------|-------|
| _JUNCTION_ASSEMBLY                                                                                         |     |       |       |       |       |
| GO_POSITIVE_REGULATION_OF_CARDIAC_MUSCLE_TISSUE_DEVELOPMENT                                                | 28  | 0.456 | 1.521 | 0.027 | 0.115 |
| GO_NEGATIVE_REGULATION_OF_LIPID_CATABOLIC_PROCESS                                                          | 19  | 0.535 | 1.521 | 0.055 | 0.115 |
| GO_POSITIVE_REGULATION_OF_LIPID_TRANSPORT                                                                  | 50  | 0.401 | 1.520 | 0.035 | 0.115 |
| GO_ACTIN_MYOSIN_FILAMENT_SLIDING                                                                           | 38  | 0.471 | 1.519 | 0.043 | 0.116 |
| GO_REGULATION_OF_PROTEIN_KINASE_A_SIGNALING                                                                | 17  | 0.526 | 1.519 | 0.062 | 0.116 |
| GO_STAT_CASCADE                                                                                            | 47  | 0.458 | 1.519 | 0.058 | 0.116 |
| GO_CELL_CORTEX_PART                                                                                        | 110 | 0.369 | 1.518 | 0.025 | 0.117 |
| GO_T_CELL_DIFFERENTIATION                                                                                  | 123 | 0.436 | 1.517 | 0.087 | 0.116 |
| GO_REGULATION_OF_ENERGY_HOMEOSTASIS                                                                        | 17  | 0.536 | 1.517 | 0.062 | 0.117 |
| GO_POSITIVE_REGULATION_OF_SODIUM_ION_TRANSMEMBRANE_TRANSPORT                                               | 16  | 0.521 | 1.517 | 0.072 | 0.117 |
| GO_TRANSCRIPTION_FACTOR_ACTIVITY_RNA_POLYMERASE_II_CORE_PROMOTER_PROXIMAL_REGION_SEQUENCE_SPECIFIC_BINDING | 323 | 0.322 | 1.516 | 0.010 | 0.117 |
| GO_POSITIVE_REGULATION_OF_GLYCOGEN_METABOLIC_PROCESS                                                       | 16  | 0.520 | 1.516 | 0.052 | 0.117 |
| GO_REGULATION_OF_MONOCYTE_CHEMOTAXIS                                                                       | 20  | 0.565 | 1.516 | 0.082 | 0.117 |
| GO_ESTABLISHMENT_OF_ENDOTHELIAL_BARRIER                                                                    | 29  | 0.473 | 1.515 | 0.074 | 0.118 |
| GO_IMMUNOGLOBULIN_BINDING                                                                                  | 20  | 0.585 | 1.515 | 0.079 | 0.118 |
| GO_RESPONSE_TO_MAGNESIUM_ION                                                                               | 23  | 0.477 | 1.515 | 0.031 | 0.118 |
| GO_GLUTATHIONE_TRANSFERASE_ACTIVITY                                                                        | 31  | 0.470 | 1.515 | 0.064 | 0.118 |
| GO_SARCOPLASMIC_RETICULUM_MEMBRANE                                                                         | 36  | 0.455 | 1.515 | 0.065 | 0.118 |
| GO_VENOUS_BLOOD_VESSEL_DEVELOPMENT                                                                         | 15  | 0.575 | 1.514 | 0.047 | 0.118 |
| GO_REGULATION_OF_ASTROCYTE_DIFFERENTIATION                                                                 | 27  | 0.472 | 1.514 | 0.039 | 0.118 |
| GO_POSITIVE_REGULATION_OF_FIBROBLAST_PROLIFERATION                                                         | 52  | 0.396 | 1.514 | 0.029 | 0.118 |
| GO_EPITHELIAL_CELL_PROLIFERATION                                                                           | 86  | 0.378 | 1.514 | 0.026 | 0.118 |
| GO_POSITIVE_REGULATION_OF_NEUTROPHIL                                                                       | 26  | 0.502 | 1.514 | 0.069 | 0.118 |

|                                                            |     |       |       |       |       |
|------------------------------------------------------------|-----|-------|-------|-------|-------|
| ROPHIL_MIGRATION                                           |     |       |       |       |       |
| GO_RESPONSE_TO ESTRADIOL                                   | 145 | 0.339 | 1.513 | 0.010 | 0.118 |
| GO_ALPHA_BETA_T_CELL_DIFFERENTIATION                       | 45  | 0.486 | 1.513 | 0.081 | 0.118 |
| GO_Glutamate_Receptor_Activity                             | 27  | 0.529 | 1.511 | 0.072 | 0.119 |
| GO_Regulation_of_Tyrosine_Phosphorylation_of_Stat3_Protein | 43  | 0.421 | 1.511 | 0.042 | 0.119 |
| GO_Ventricular_Septum_Development                          | 53  | 0.415 | 1.511 | 0.038 | 0.119 |
| GO_Response_to_Isoquinoline_Alkaloid                       | 29  | 0.466 | 1.511 | 0.043 | 0.119 |
| GO_Regulation_of_Thymocyte_Aggregation                     | 25  | 0.453 | 1.510 | 0.030 | 0.119 |
| GO_Regulation_of_Receptor_Binding                          | 17  | 0.520 | 1.510 | 0.050 | 0.120 |
| GO_Endothelial_Cell_Migration                              | 55  | 0.417 | 1.510 | 0.046 | 0.120 |
| GO_Regulation_of_Glycoprotein_Metabolic_Process            | 39  | 0.436 | 1.509 | 0.043 | 0.120 |
| GO_Regulation_of_Leukocyte_Apoptotic_Process               | 76  | 0.424 | 1.509 | 0.078 | 0.120 |
| GO_Secondary_Metabolic_Processes                           | 48  | 0.428 | 1.509 | 0.049 | 0.120 |
| GO_Regulation_of_Histone_Deacetylation                     | 24  | 0.464 | 1.508 | 0.052 | 0.120 |
| GO_Regulation_of_Organ_Morphogenesis                       | 240 | 0.332 | 1.508 | 0.022 | 0.120 |
| GO_Negative_Regulation_of_Leukocyte_Differentiation        | 78  | 0.384 | 1.508 | 0.052 | 0.120 |
| GO_Glutamate_Receptor_Signaling_Pathway                    | 41  | 0.460 | 1.507 | 0.059 | 0.121 |
| GO_Copper_Ion_Binding                                      | 51  | 0.403 | 1.507 | 0.029 | 0.121 |
| GO_Response_to_Molecule_of_Bacterial_Origin                | 313 | 0.371 | 1.507 | 0.050 | 0.121 |
| GO_Endoderm_Development                                    | 70  | 0.399 | 1.507 | 0.048 | 0.121 |
| GO_Replacement_Ossification                                | 25  | 0.508 | 1.507 | 0.077 | 0.121 |
| GO_Response_to_Alkaloid                                    | 133 | 0.348 | 1.507 | 0.012 | 0.121 |
| GO_Regulation_of_Nucleotide_Catabolic_Process              | 33  | 0.422 | 1.507 | 0.041 | 0.121 |
| GO_Polysaccharide_Metabolic_Process                        | 78  | 0.389 | 1.507 | 0.032 | 0.121 |
| GO_Multi_Organism_Behavior                                 | 73  | 0.378 | 1.506 | 0.039 | 0.121 |
| GO_Negative_Regulation_of_Wound_Healing                    | 58  | 0.481 | 1.506 | 0.051 | 0.121 |

|                                                         |     |       |       |       |       |
|---------------------------------------------------------|-----|-------|-------|-------|-------|
| GO_PHOTORECEPTOR_OUTER_SEGMENTS                         | 66  | 0.423 | 1.506 | 0.053 | 0.121 |
| GO_NEGATIVE_REGULATION_OF_NUCLEOCYTOPLASMIC_TRANSPORT   | 69  | 0.380 | 1.505 | 0.026 | 0.121 |
| GO_REGULATION_OF_CARBOHYDRATE_METABOLIC_PROCESS         | 157 | 0.324 | 1.505 | 0.006 | 0.121 |
| GO_ACTIN_FILAMENT_ORGANIZATION                          | 161 | 0.345 | 1.504 | 0.034 | 0.121 |
| GO_ACTIN_BASED_CELL_PROJECTION                          | 171 | 0.322 | 1.504 | 0.024 | 0.121 |
| GO_MYOBLAST_FUSION                                      | 19  | 0.519 | 1.504 | 0.063 | 0.121 |
| GO_REGULATION_OF_T_CELL_DIFFERENTIATION                 | 100 | 0.410 | 1.504 | 0.083 | 0.122 |
| GO_PHOSPHOLIPASE_C_ACTIVITY                             | 31  | 0.450 | 1.504 | 0.036 | 0.122 |
| GO_ENDOCYTOSIS                                          | 462 | 0.336 | 1.503 | 0.025 | 0.122 |
| GO_POSITIVE_REGULATION_OF_INTERLEUKIN_4_PRODUCTION      | 22  | 0.551 | 1.502 | 0.107 | 0.122 |
| GO_CRANIAL_SKELETAL_SYSTEM_DEVELOPMENT                  | 55  | 0.425 | 1.502 | 0.041 | 0.122 |
| GO_REGULATION_OF_MESODERM_DEVELOPMENT                   | 15  | 0.548 | 1.502 | 0.035 | 0.123 |
| GO_TELENCEPHALON_GLIAL_CELL_MIGRATION                   | 18  | 0.522 | 1.501 | 0.052 | 0.123 |
| GO_POSITIVE_CHEMOTAXIS                                  | 35  | 0.441 | 1.501 | 0.041 | 0.123 |
| GO_HEPARAN_SULFATE_PROTEOGLYCAN_BINDING                 | 18  | 0.513 | 1.501 | 0.046 | 0.123 |
| GO_MORPHOGENESIS_OF_AN_EPITHELIAL_FOLD                  | 15  | 0.515 | 1.501 | 0.052 | 0.123 |
| GO_MAST_CELL_MEDIATED_IMMUNITY                          | 18  | 0.545 | 1.500 | 0.084 | 0.123 |
| GO_REGULATION_OF_PLATELET_AGGREGATION                   | 16  | 0.532 | 1.500 | 0.074 | 0.123 |
| GO_METALLOENDOPEPTIDASE_ACTIVITY                        | 107 | 0.378 | 1.499 | 0.049 | 0.124 |
| GO_NEGATIVE_REGULATION_OF_LIPID_STORAGE                 | 17  | 0.536 | 1.499 | 0.086 | 0.124 |
| GO_NEGATIVE_REGULATION_OF_RESPONSE_TO_CYTOKINE_STIMULUS | 41  | 0.415 | 1.499 | 0.043 | 0.124 |
| GO_REGULATION_OF_RESPONSE_TO_REACTIVE_OXYGEN_SPECIES    | 32  | 0.435 | 1.499 | 0.048 | 0.124 |
| GO_PROTEIN_TYROSINE_KINASE_BINDING                      | 52  | 0.387 | 1.498 | 0.027 | 0.124 |
| GO_POSITIVE_REGULATION_OF_HEMOPOIESIS                   | 155 | 0.368 | 1.498 | 0.053 | 0.124 |
| GO_CELL_CHEMOTAXIS                                      | 157 | 0.407 | 1.497 | 0.056 | 0.124 |
| GO_CELL_CORTEX                                          | 225 | 0.335 | 1.497 | 0.022 | 0.124 |

---

|                                                              |     |       |       |       |       |
|--------------------------------------------------------------|-----|-------|-------|-------|-------|
| GO_CELLULAR_RESPONSE_TO_RETIN<br>OIC_ACID                    | 61  | 0.388 | 1.497 | 0.032 | 0.124 |
| GO_CELL_DIFFERENTIATION_IN_SPIN<br>AL_CORD                   | 53  | 0.432 | 1.497 | 0.048 | 0.125 |
| GO_NEGATIVE_REGULATION_OF_IMM<br>UNE_RESPONSE                | 112 | 0.409 | 1.497 | 0.064 | 0.124 |
| GO_REGULATION_OF_HORMONE_SEC<br>RETION                       | 250 | 0.332 | 1.495 | 0.014 | 0.126 |
| GO_ENDODERMAL_CELL_DIFFERENTI<br>ATION                       | 40  | 0.461 | 1.495 | 0.067 | 0.126 |
| GO_NEGATIVE_REGULATION_OF_GLIO<br>GENESIS                    | 37  | 0.443 | 1.494 | 0.044 | 0.126 |
| GO_CELLULAR_RESPONSE_TO_OXYGE<br>N_LEVELS                    | 137 | 0.332 | 1.494 | 0.020 | 0.126 |
| GO_NEGATIVE_REGULATION_OF_BEH<br>AVIOR                       | 16  | 0.526 | 1.493 | 0.052 | 0.127 |
| GO_POSITIVE_REGULATION_OF_CELL<br>ULAR_COMPONENT_BIOGENESIS  | 374 | 0.299 | 1.493 | 0.004 | 0.127 |
| GO_MRNA_TRANSCRIPTION                                        | 21  | 0.483 | 1.493 | 0.048 | 0.127 |
| GO_POSITIVE_REGULATION_OF_KIDN<br>EY_DEVELOPMENT             | 41  | 0.440 | 1.493 | 0.041 | 0.127 |
| GO_REGULATION_OF_ANION_TRANSP<br>ORT                         | 133 | 0.331 | 1.492 | 0.012 | 0.127 |
| GO_REGULATION_OF_INTERLEUKIN_6<br>_PRODUCTION                | 100 | 0.413 | 1.492 | 0.058 | 0.127 |
| GO_EXTRACELLULAR_LIGAND_GATE<br>D_ION_CHANNEL_ACTIVITY       | 75  | 0.431 | 1.492 | 0.067 | 0.127 |
| GO_HUMORAL_IMMUNE_RESPONSE                                   | 139 | 0.403 | 1.491 | 0.059 | 0.128 |
| GO_REGULATION_OF_MEMBRANE_PR<br>OTEIN_ECTODOMAIN_PROTEOLYSIS | 20  | 0.500 | 1.491 | 0.064 | 0.128 |
| GO_CHRONIC_INFLAMMATORY_RESPO<br>NSE                         | 15  | 0.542 | 1.491 | 0.066 | 0.128 |
| GO_NITRIC_OXIDE_MEDIATED_SIGNA<br>L_TRANSDUCTION             | 19  | 0.540 | 1.490 | 0.066 | 0.128 |
| GO_MYELIN_ASSEMBLY                                           | 15  | 0.523 | 1.490 | 0.078 | 0.128 |
| GO_BETA_CATENIN_BINDING                                      | 80  | 0.395 | 1.490 | 0.059 | 0.128 |
| GO_GLANDULAR_EPITHELIAL_CELL_<br>DEVELOPMENT                 | 17  | 0.538 | 1.490 | 0.065 | 0.128 |
| GO_REGULATION_OF_DENDRITE_MOR<br>PHOGENESIS                  | 72  | 0.379 | 1.489 | 0.031 | 0.128 |
| GO_PEPTIDE_HORMONE_PROCESSING                                | 29  | 0.496 | 1.489 | 0.045 | 0.128 |
| GO_SPINAL_CORD_MOTOR_NEURON_<br>DIFFERENTIATION              | 34  | 0.449 | 1.488 | 0.030 | 0.129 |
| GO_PATTERNING_OF_BLOOD_VESSELS                               | 31  | 0.484 | 1.488 | 0.073 | 0.129 |

|                                                                 |     |       |       |       |       |
|-----------------------------------------------------------------|-----|-------|-------|-------|-------|
| GO_REGULATION_OF_VESICLE_MEDIATED_TRANSPORT                     | 451 | 0.311 | 1.488 | 0.015 | 0.129 |
| GO_PROXIMAL_DISTAL_PATTERN_FORMATION                            | 32  | 0.478 | 1.488 | 0.057 | 0.129 |
| GO_REGULATION_OF_MACROPHAGE_ACTIVATION                          | 25  | 0.464 | 1.487 | 0.038 | 0.129 |
| GO_NEGATIVE_REGULATION_OF_AXON_EXTENSION                        | 37  | 0.436 | 1.487 | 0.053 | 0.129 |
| GO_ACTIN_MONOMER_BINDING                                        | 25  | 0.449 | 1.487 | 0.052 | 0.129 |
| GO_MYELOID_LEUKOCYTE_MIGRATION                                  | 95  | 0.419 | 1.486 | 0.061 | 0.130 |
| GO_ADRENERGIC_RECEPTOR_BINDING                                  | 18  | 0.488 | 1.486 | 0.068 | 0.130 |
| GO_EPITHELIAL_CELL_DIFFERENTIATION                              | 464 | 0.321 | 1.486 | 0.027 | 0.130 |
| GO_NEGATIVE_REGULATION_OF_IMMUNE_EFFECTOR_PROCESS               | 96  | 0.402 | 1.485 | 0.080 | 0.130 |
| GO_PHOSPHATIDYLINOSITOL_3_KINASE_BINDING                        | 29  | 0.455 | 1.485 | 0.054 | 0.130 |
| GO_POSITIVE_REGULATION_OF_LEUKOCYTE_DIFFERENTIATION             | 123 | 0.395 | 1.484 | 0.068 | 0.131 |
| GO_NEGATIVE_REGULATION_OF_CATION_TRANSMEMBRANE_TRANSPORT        | 58  | 0.377 | 1.483 | 0.033 | 0.131 |
| GO_OXIDOREDUCTASE_ACTIVITY_ACTING_ON_THE_CH_NH2_GROUP_OF_DONORS | 18  | 0.529 | 1.483 | 0.071 | 0.131 |
| GO_POSITIVE_REGULATION_OF_JUN_KINASE_ACTIVITY                   | 60  | 0.410 | 1.483 | 0.048 | 0.132 |
| GO_CELL_VOLUME_HOMEOSTASIS                                      | 27  | 0.432 | 1.482 | 0.039 | 0.132 |
| GO_REGULATION_OF_CARDIAC_MUSCLE_CELL_PROLIFERATION              | 28  | 0.451 | 1.482 | 0.057 | 0.132 |
| GO_LENS_FIBER_CELL_DIFFERENTIATION                              | 25  | 0.459 | 1.482 | 0.045 | 0.132 |
| GO_SODIUM_CHANNEL_ACTIVITY                                      | 32  | 0.455 | 1.481 | 0.057 | 0.132 |
| GO_NEUROMUSCULAR_JUNCTION_DEVELOPMENT                           | 35  | 0.438 | 1.480 | 0.051 | 0.133 |
| GO_RESPONSE_TO_MONOAMINE                                        | 34  | 0.433 | 1.480 | 0.042 | 0.133 |
| GO_POSITIVE_REGULATION_OF_PEPIDYL_SERINE_PHOSPHORYLATION        | 74  | 0.368 | 1.479 | 0.026 | 0.134 |
| GO_GLYCOSPHINGOLIPID_METABOLIC_PROCESS                          | 66  | 0.383 | 1.478 | 0.036 | 0.134 |
| GO_SPLEEN_DEVELOPMENT                                           | 38  | 0.411 | 1.477 | 0.062 | 0.134 |
| GO_REGULATION_OF_CORTICOSTEROID_HORMONE_SECRETION               | 15  | 0.557 | 1.477 | 0.065 | 0.135 |

|                                                                           |     |       |       |       |       |
|---------------------------------------------------------------------------|-----|-------|-------|-------|-------|
| GO_SECRETORY_GRANULE_MEMBRANE                                             | 76  | 0.371 | 1.477 | 0.023 | 0.135 |
| GO_MUSCLE_FIBER_DEVELOPMENT                                               | 41  | 0.417 | 1.477 | 0.045 | 0.135 |
| GO_MYOSIN_II_COMPLEX                                                      | 25  | 0.501 | 1.475 | 0.058 | 0.136 |
| GO_REGULATION_OF_NITRIC_OXIDE_BIOSYNTHETIC_PROCESS                        | 52  | 0.416 | 1.475 | 0.058 | 0.136 |
| GO_PRESYNAPSE                                                             | 273 | 0.346 | 1.474 | 0.028 | 0.136 |
| GO_NEGATIVE_REGULATION_OF_INTERLEUKIN_1_PRODUCTION                        | 17  | 0.528 | 1.474 | 0.071 | 0.136 |
| GO_GAP_JUNCTION_CHANNEL_ACTIVITY                                          | 16  | 0.520 | 1.474 | 0.086 | 0.136 |
| GO_EXOCYTIC_VESICLE                                                       | 139 | 0.354 | 1.474 | 0.056 | 0.136 |
| GO_POSITIVE_REGULATION_OF_B_CELL_PROLIFERATION                            | 37  | 0.474 | 1.473 | 0.111 | 0.136 |
| GO_EPIDERMIS_MORPHOGENESIS                                                | 28  | 0.480 | 1.473 | 0.061 | 0.136 |
| GO_DETECTION_OF ABIOTIC STIMULUS                                          | 110 | 0.394 | 1.473 | 0.069 | 0.136 |
| GO_SALIVARY_GLAND_DEVELOPMENT                                             | 31  | 0.465 | 1.473 | 0.073 | 0.137 |
| GO_B_CELL_PROLIFERATION                                                   | 24  | 0.556 | 1.473 | 0.095 | 0.137 |
| GO_SYNAPTIC_TRANSMISSION_DOPAMINERGIC                                     | 15  | 0.520 | 1.473 | 0.053 | 0.136 |
| GO_REGENERATION                                                           | 155 | 0.340 | 1.472 | 0.032 | 0.137 |
| GO_RECEPTOR_SIGNALING_COMPLEX_SCAFFOLD_ACTIVITY                           | 23  | 0.466 | 1.472 | 0.050 | 0.137 |
| GO_REGULATION_OF_INTRACELLULAR_STEROID_HORMONE_RECEPTOR_SIGNALING_PATHWAY | 55  | 0.381 | 1.472 | 0.037 | 0.137 |
| GO_ALPHA_BETA_T_CELL_ACTIVATION                                           | 52  | 0.464 | 1.471 | 0.104 | 0.137 |
| GO_NEUROTRANSMITTER_RECEPTOR_ACTIVITY                                     | 67  | 0.426 | 1.471 | 0.077 | 0.138 |
| GO_REGULATION_OF_PROTEIN_TARGETING                                        | 285 | 0.300 | 1.471 | 0.010 | 0.137 |
| GO_ODONTOGENESIS                                                          | 103 | 0.375 | 1.470 | 0.044 | 0.138 |
| GO_CARTILAGE_DEVELOPMENT_INVOLVED_IN_ENDOCHONDRAL_BONE_MORPHOGENESIS      | 19  | 0.487 | 1.470 | 0.074 | 0.138 |
| GO_NEGATIVE_REGULATION_OF_T_CELL_DIFFERENTIATION                          | 29  | 0.447 | 1.469 | 0.063 | 0.138 |
| GO_EMBRYONIC_HEART_TUBE_MORPHOGENESIS                                     | 61  | 0.389 | 1.468 | 0.043 | 0.139 |
| GO_REGULATION_OF_HEART_MORPHOGENESIS                                      | 28  | 0.437 | 1.468 | 0.041 | 0.139 |



|                                                                                        |     |       |       |       |       |
|----------------------------------------------------------------------------------------|-----|-------|-------|-------|-------|
| GO_MYOSIN_COMPLEX                                                                      | 66  | 0.399 | 1.468 | 0.063 | 0.139 |
| GO_REGULATION_OF_LIPID_STORAGE                                                         | 39  | 0.430 | 1.467 | 0.095 | 0.139 |
| GO_APPENDAGE_DEVELOPMENT                                                               | 165 | 0.359 | 1.467 | 0.046 | 0.140 |
| GO_DIVALENT_INORGANIC_CATION_TRANSMEMBRANE_TRANSPORTER_ACTIVITY                        | 162 | 0.347 | 1.467 | 0.038 | 0.139 |
| GO_PROTEIN_LIPID_COMPLEX_BINDING                                                       | 24  | 0.495 | 1.467 | 0.074 | 0.139 |
| GO_REGULATION_OF_COAGULATION                                                           | 86  | 0.423 | 1.466 | 0.060 | 0.140 |
| GO_REGULATION_OF_CELLULAR_COMPONENT_SIZE                                               | 322 | 0.305 | 1.465 | 0.014 | 0.140 |
| GO_NEGATIVE_REGULATION_OF_KINASE_ACTIVITY                                              | 244 | 0.304 | 1.465 | 0.015 | 0.140 |
| GO_RENAL_SYSTEM_PROCESS_INVOLVED_IN_REGULATION_OF_SYSTEMIC_ARTERIAL_BLOOD_PRESSURE     | 23  | 0.484 | 1.465 | 0.069 | 0.140 |
| GO_KIDNEY_MESENCHYME_DEVELOPMENT                                                       | 17  | 0.524 | 1.465 | 0.070 | 0.140 |
| GO_EXTRINSIC_COMPONENT_OF_MEMBRANE                                                     | 241 | 0.327 | 1.465 | 0.029 | 0.140 |
| GO_LEUKOCYTE_CHEMOTAXIS                                                                | 113 | 0.422 | 1.464 | 0.083 | 0.140 |
| GO_REGULATION_OF_WNT_SIGNALING_PATHWAY                                                 | 297 | 0.310 | 1.464 | 0.024 | 0.140 |
| GO_TRANSCRIPTION_FACTOR_ACTIVITY_DIRECT_LIGAND_REGULATED_SEQUENCE_SPECIFIC_DNA_BINDING | 46  | 0.414 | 1.464 | 0.065 | 0.140 |
| GO_MYELOID_CELL_DIFFERENTIATION                                                        | 181 | 0.334 | 1.464 | 0.044 | 0.140 |
| GO_CATION_TRANSPORTING_ATPASE_COMPLEX                                                  | 16  | 0.505 | 1.464 | 0.061 | 0.141 |
| GO_SMALL_GTPASE_MEDIATED_SIGNAL_TRANSDUCTION                                           | 342 | 0.302 | 1.463 | 0.028 | 0.141 |
| GO_OLIGOSACCHARIDE_METABOLIC_PROCESS                                                   | 63  | 0.381 | 1.463 | 0.041 | 0.141 |
| GO_NEGATIVE_REGULATION_OF_OSTEOCLAST_DIFFERENTIATION                                   | 24  | 0.495 | 1.463 | 0.077 | 0.141 |
| GO_SYNCYTIUM_FORMATION                                                                 | 25  | 0.478 | 1.463 | 0.090 | 0.141 |
| GO_RESPONSE_TO_VITAMIN                                                                 | 98  | 0.337 | 1.462 | 0.020 | 0.141 |
| GO_VENTRAL_SPINAL_CORD_DEVELOPMENT                                                     | 46  | 0.424 | 1.459 | 0.055 | 0.144 |
| GO_REGULATION_OF_PROTEIN_DEACETYLATION                                                 | 33  | 0.415 | 1.459 | 0.065 | 0.144 |
| GO_REGULATION_OF_REPRODUCTIVE_PROCESS                                                  | 125 | 0.346 | 1.458 | 0.031 | 0.144 |

|                                                                        |     |       |       |       |       |
|------------------------------------------------------------------------|-----|-------|-------|-------|-------|
| GO_POSITIVE_REGULATION_OF_SECRETION                                    | 358 | 0.309 | 1.458 | 0.011 | 0.144 |
| GO_FORMATION_OF_PRIMARY_GERM_LAYER                                     | 109 | 0.369 | 1.458 | 0.058 | 0.144 |
| GO_CELL_CORTEX_REGION                                                  | 16  | 0.509 | 1.457 | 0.056 | 0.144 |
| GO_LONG_TERM_MEMORY                                                    | 28  | 0.457 | 1.456 | 0.070 | 0.146 |
| GO_REGULATION_OF_SYSTEMIC_ARTERIAL_BLOOD_PRESSURE_BY_RENIN_ANGIOTENSIN | 22  | 0.507 | 1.455 | 0.078 | 0.146 |
| GO_CELLULAR_RESPONSE_TO_KESTONE                                        | 71  | 0.385 | 1.455 | 0.049 | 0.146 |
| GO_MICROVILLUS                                                         | 73  | 0.376 | 1.454 | 0.073 | 0.146 |
| GO_CELL_MATURATION                                                     | 121 | 0.314 | 1.454 | 0.022 | 0.146 |
| GO_POSITIVE_REGULATION_OF_STEM_CELL_DIFFERENTIATION                    | 48  | 0.401 | 1.453 | 0.062 | 0.147 |
| GO_CERAMIDE_BIOSYNTHETIC_PROCESS                                       | 43  | 0.393 | 1.453 | 0.063 | 0.147 |
| GO_REGULATION_OF_HEMOPOIESIS                                           | 300 | 0.330 | 1.453 | 0.059 | 0.147 |
| GO_RESPONSE_TO_PEPTIDE                                                 | 392 | 0.298 | 1.452 | 0.016 | 0.148 |
| GO_ISOPRENOID_BINDING                                                  | 40  | 0.436 | 1.452 | 0.062 | 0.148 |
| GO_LEUKOTRIENE_BIOSYNTHETIC_PROCESS                                    | 20  | 0.480 | 1.452 | 0.056 | 0.148 |
| GO_PDZ_DOMAIN_BINDING                                                  | 88  | 0.349 | 1.452 | 0.048 | 0.148 |
| GO_APOPTOTIC_PROCESS_INVOLVED_IN_DEVELOPMENT                           | 20  | 0.477 | 1.451 | 0.061 | 0.148 |
| GO_PHOSPHATIDYLINOSITOL_3_4_5_TRISPHOSPHATE_BINDING                    | 33  | 0.429 | 1.451 | 0.049 | 0.148 |
| GO_ACTIVATION_OF_PROTEIN_KINASE_B_ACTIVITY                             | 20  | 0.465 | 1.451 | 0.077 | 0.148 |
| GO_INNER_EAR_MORPHOGENESIS                                             | 91  | 0.370 | 1.450 | 0.047 | 0.148 |
| GO_FATTY_ACID_DERIVATIVE_BIOSYNTHETIC_PROCESS                          | 42  | 0.402 | 1.450 | 0.048 | 0.148 |
| GO_ORGAN_INDUCTION                                                     | 16  | 0.515 | 1.450 | 0.083 | 0.149 |
| GO_CELLULAR_RESPONSE_TO_EXTRACELLULAR_STIMULUS                         | 181 | 0.313 | 1.449 | 0.029 | 0.149 |
| GO_MATURE_B_CELL_DIFFERENTIATION                                       | 17  | 0.553 | 1.449 | 0.102 | 0.149 |
| GO_REGULATION_OF_NEUROTRANSMITTER_LEVELS                               | 180 | 0.351 | 1.449 | 0.034 | 0.149 |
| GO_SH3_SH2_ADAPTOR_ACTIVITY                                            | 52  | 0.410 | 1.449 | 0.084 | 0.149 |
| GO_BINDING_BRIDGING                                                    | 172 | 0.328 | 1.449 | 0.028 | 0.149 |
| GO_SERINE_HYDROLASE_ACTIVITY                                           | 211 | 0.344 | 1.448 | 0.026 | 0.149 |
| GO_EMBRYONIC_HEART_TUBE_DEVELOPMENT                                    | 71  | 0.372 | 1.448 | 0.049 | 0.149 |

|                                                                      |     |       |       |       |       |
|----------------------------------------------------------------------|-----|-------|-------|-------|-------|
| GO_REGULATION_OF_PROTEIN_ACTIVATION_CASCADE                          | 34  | 0.492 | 1.447 | 0.081 | 0.150 |
| GO_REGULATION_OF_CYTOKINE_SECRETION                                  | 138 | 0.401 | 1.447 | 0.084 | 0.150 |
| GO_POSITIVE_REGULATION_OF_MULTICELLULAR_ORGANISMAL_METABOLIC_PROCESS | 20  | 0.496 | 1.447 | 0.079 | 0.150 |
| GO_REGULATION_OF_REACTIVE_OXYGEN_SPECIES_METABOLIC_PROCESS           | 146 | 0.332 | 1.446 | 0.035 | 0.151 |
| GO_POSITIVE_REGULATION_OF_PHOSPHATASE_ACTIVITY                       | 27  | 0.461 | 1.445 | 0.094 | 0.151 |
| GO_PATTERN_SPECIFICATION_PROCESSES                                   | 405 | 0.315 | 1.445 | 0.028 | 0.151 |
| GO_METANEPHRIC_EPITHELIUM_DEVELOPMENT                                | 20  | 0.461 | 1.444 | 0.083 | 0.152 |
| GO_HOMEOSTASIS_OF_NUMBER_OF_CELLS_WITHIN_A_TISSUE                    | 30  | 0.409 | 1.444 | 0.054 | 0.152 |
| GO_HYALURONAN_METABOLIC_PROCESS                                      | 29  | 0.461 | 1.444 | 0.095 | 0.152 |
| GO_REGULATION_OF_MYELOID_LEUKOCYTE_DIFFERENTIATION                   | 101 | 0.357 | 1.443 | 0.056 | 0.152 |
| GO_REGULATION_OF_CELL_PROJECTIION_ASSEMBLY                           | 142 | 0.325 | 1.442 | 0.033 | 0.153 |
| GO_RESPONSE_TO_RETINOIC_ACID                                         | 102 | 0.339 | 1.442 | 0.038 | 0.153 |
| GO_NEGATIVE_REGULATION_OF_MYOBLAST_DIFFERENTIATION                   | 23  | 0.442 | 1.441 | 0.057 | 0.154 |
| GO_LYMPH_NODE_DEVELOPMENT                                            | 17  | 0.518 | 1.441 | 0.109 | 0.154 |
| GO_RENAL_SYSTEM_PROCESS_INVOLVED_IN_REGULATION_OF_BLOOD_VOLUME       | 17  | 0.499 | 1.441 | 0.072 | 0.154 |
| GO_AMMONIUM_TRANSPORT                                                | 55  | 0.371 | 1.441 | 0.040 | 0.154 |
| GO_NEGATIVE_REGULATION_OF_RESPONSE_TO_EXTRACELLULAR_STIMULUS         | 32  | 0.407 | 1.441 | 0.046 | 0.154 |
| GO_NEURON_PROJECTION_TERMINUS                                        | 124 | 0.378 | 1.441 | 0.044 | 0.154 |
| GO_REGULATION_OF_CHEMOKINE_PRODUCTION                                | 63  | 0.428 | 1.440 | 0.078 | 0.154 |
| GO_CELLULAR_RESPONSE_TO_LIPID                                        | 439 | 0.297 | 1.440 | 0.028 | 0.154 |
| GO_SYNAPTIC_TRANSMISSION_CHOLINERGIC                                 | 36  | 0.455 | 1.440 | 0.089 | 0.154 |
| GO_EMBRYONIC_EYE_MORPHOGENESIS                                       | 33  | 0.432 | 1.439 | 0.075 | 0.154 |
| GO_STRESS_ACTIVATED_PROTEIN_KINASE_SIGNALING_CASCADE                 | 100 | 0.344 | 1.439 | 0.038 | 0.154 |

---

|                                |     |       |       |       |       |
|--------------------------------|-----|-------|-------|-------|-------|
| GO_REGULATION_OF_ANDROGEN_RE   |     |       |       |       |       |
| CEPTOR_SIGNALING_PATHWAY       | 22  | 0.449 | 1.438 | 0.067 | 0.155 |
| GO_MYOSIN_BINDING              | 58  | 0.360 | 1.437 | 0.050 | 0.156 |
| GO_ALCOHOL_BINDING             | 98  | 0.361 | 1.436 | 0.038 | 0.156 |
| GO_REGULATION_OF_CGMP_BIOSYNT  |     |       |       |       |       |
| HETIC_PROCESS                  | 22  | 0.461 | 1.436 | 0.083 | 0.156 |
| GO_EMBRYO_IMPLANTATION         | 37  | 0.404 | 1.436 | 0.072 | 0.156 |
| GO_MAMMARY_GLAND_EPITHELIAL_   |     |       |       |       |       |
| CELL_DIFFERENTIATION           | 16  | 0.493 | 1.436 | 0.076 | 0.156 |
| GO_PHOSPHATIDYLINOSITOL_BISPHO |     |       |       |       |       |
| SPHATE_BINDING                 | 68  | 0.358 | 1.435 | 0.052 | 0.157 |
| GO_ACTIN_CYTOSKELETON_REORGA   |     |       |       |       |       |
| NIZATION                       | 54  | 0.395 | 1.434 | 0.068 | 0.157 |
| GO_NEGATIVE_REGULATION_OF_GLY  |     |       |       |       |       |
| COPROTEIN_METABOLIC_PROCESS    | 15  | 0.537 | 1.434 | 0.080 | 0.157 |
| GO_POSITIVE_REGULATION_OF_NATU |     |       |       |       |       |
| RAL_KILLER_CELL_ACTIVATION     | 17  | 0.492 | 1.433 | 0.092 | 0.158 |
| GO_SODIUM_ION_TRANSMEMBRANE_   |     |       |       |       |       |
| TRANSPORT                      | 84  | 0.376 | 1.433 | 0.068 | 0.158 |
| GO_BONE_REMODELING             | 35  | 0.430 | 1.432 | 0.076 | 0.158 |
| GO_AORTA_MORPHOGENESIS         | 22  | 0.478 | 1.432 | 0.084 | 0.159 |
| GO_SECRETORY_GRANULE_ORGANIZ   |     |       |       |       |       |
| ATION                          | 23  | 0.430 | 1.431 | 0.049 | 0.159 |
| GO_PROTEIN_LOCALIZATION_TO_CEL |     |       |       |       |       |
| L_PERIPHERY                    | 150 | 0.313 | 1.431 | 0.039 | 0.159 |
| GO_HYALURONIC_ACID_BINDING     | 20  | 0.497 | 1.431 | 0.090 | 0.159 |
| GO_DORSAL_VENTRAL_PATTERN_FOR  |     |       |       |       |       |
| MATION                         | 90  | 0.363 | 1.431 | 0.046 | 0.159 |
| GO_RESPONSE_TO_CARBOHYDRATE    | 161 | 0.327 | 1.431 | 0.035 | 0.159 |
| GO_NEGATIVE_REGULATION_OF_ADA  |     |       |       |       |       |
| PTIVE_IMMUNE_RESPONSE          | 34  | 0.456 | 1.430 | 0.104 | 0.160 |
| GO_REACTIVE_OXYGEN_SPECIES_MET |     |       |       |       |       |
| ABOLIC_PROCESS                 | 95  | 0.351 | 1.430 | 0.048 | 0.160 |
| GO_REGULATION_OF_POTASSIUM_ION |     |       |       |       |       |
| _TRANSMEMBRANE_TRANSPORTER_A   |     |       |       |       |       |
| CTIVITY                        | 40  | 0.403 | 1.430 | 0.074 | 0.159 |
| GO_STEROID_HYDROXYLASE_ACTIVI  |     |       |       |       |       |
| TY                             | 31  | 0.463 | 1.429 | 0.101 | 0.160 |
| GO_COPULATION                  | 17  | 0.506 | 1.429 | 0.097 | 0.160 |
| GO_AXONAL_GROWTH_CONE          | 19  | 0.479 | 1.429 | 0.097 | 0.160 |
| GO_AXON_PART                   | 208 | 0.334 | 1.428 | 0.044 | 0.161 |
| GO_CELLULAR_RESPONSE_TO_FATTY_ |     |       |       |       |       |
| ACID                           | 51  | 0.383 | 1.428 | 0.070 | 0.161 |
| GO_DRUG_BINDING                | 106 | 0.322 | 1.428 | 0.018 | 0.161 |

|                                                                  |     |       |       |       |       |
|------------------------------------------------------------------|-----|-------|-------|-------|-------|
| GO_REGULATION_OF_P38MAPK_CASCADE                                 | 26  | 0.434 | 1.428 | 0.070 | 0.161 |
| GO_SEX_DETERMINATION                                             | 22  | 0.452 | 1.427 | 0.082 | 0.161 |
| GO_DIENCEPHALON_DEVELOPMENT                                      | 76  | 0.375 | 1.427 | 0.046 | 0.161 |
| GO_EXOCRINE_SYSTEM_DEVELOPMENT                                   | 43  | 0.410 | 1.426 | 0.054 | 0.161 |
| GO_NEGATIVE_REGULATION_OF_HEMOPOIESIS                            | 124 | 0.328 | 1.426 | 0.051 | 0.162 |
| GO_POSITIVE_REGULATION_OF_HEART_RATE                             | 22  | 0.435 | 1.424 | 0.072 | 0.163 |
| GO_PHOSPHATIDYLINOSITOL_3_PHOSPHATE_BIOSYNTHETIC_PROCESS         | 49  | 0.410 | 1.424 | 0.070 | 0.163 |
| GO_REGULATION_OF_MYELOID_CELL_DIFFERENTIATION                    | 176 | 0.310 | 1.423 | 0.050 | 0.163 |
| GO_REGULATION_OF_NOTCH_SIGNALING_PATHWAY                         | 64  | 0.361 | 1.423 | 0.051 | 0.163 |
| GO_B_CELL_DIFFERENTIATION                                        | 74  | 0.411 | 1.422 | 0.084 | 0.164 |
| GO_NUCLEOSIDE_TRIPHOSPHATASE_REGULATOR_ACTIVITY                  | 317 | 0.309 | 1.422 | 0.054 | 0.164 |
| GO_B_CELL_RECEPTOR_SIGNALING_PATHWAY                             | 35  | 0.557 | 1.422 | 0.181 | 0.164 |
| GO_RESPONSE_TO_FOLIC_ACID                                        | 15  | 0.495 | 1.422 | 0.099 | 0.164 |
| GO_REGULATION_OF_ARF_PROTEIN_SIGNAL_TRANSDUCTION                 | 15  | 0.524 | 1.421 | 0.082 | 0.165 |
| GO_PHENOL_CONTAINING_COMPOUND_BIOSYNTHETIC_PROCESS               | 33  | 0.442 | 1.420 | 0.067 | 0.165 |
| GO_CORTICAL_ACTIN_CYTOSKELETON                                   | 58  | 0.378 | 1.420 | 0.078 | 0.165 |
| GO_REGULATION_OF_CYTOPLASMIC_TRANSPORT                           | 460 | 0.284 | 1.420 | 0.021 | 0.166 |
| GO_SCAFFOLD_PROTEIN_BINDING                                      | 45  | 0.392 | 1.418 | 0.069 | 0.167 |
| GO_ASTROCYTE_DEVELOPMENT                                         | 19  | 0.495 | 1.418 | 0.092 | 0.167 |
| GO_NEGATIVE_REGULATION_OF_CHEMOKINE_PRODUCTION                   | 15  | 0.525 | 1.418 | 0.070 | 0.167 |
| GO_NARROW_PORE_CHANNEL_ACTIVITY                                  | 16  | 0.504 | 1.417 | 0.096 | 0.167 |
| GO_ESTABLISHMENT_OF_PROTEIN_LOCALIZATION_TO_PLASMA_MEMBRANE      | 90  | 0.341 | 1.417 | 0.055 | 0.167 |
| GO_VASCULAR_ENDOTHELIAL_GROWTH_FACTOR_RECEPTOR_SIGNALING_PATHWAY | 72  | 0.378 | 1.417 | 0.089 | 0.167 |
| GO_POSITIVE_REGULATION_OF_TUMOR_NECROSIS_FACTOR_SUPERFAMILY_     | 57  | 0.441 | 1.416 | 0.145 | 0.168 |

---

|                                                                             |     |       |       |       |       |
|-----------------------------------------------------------------------------|-----|-------|-------|-------|-------|
| CYTOKINE_PRODUCTION                                                         |     |       |       |       |       |
| GO_CATION_CATION_ANTIPORTER_ACTIVITY                                        | 24  | 0.442 | 1.414 | 0.067 | 0.169 |
| GO_PHOSPHATIDYLINOSITOL_3_KINASE_SIGNALING                                  | 22  | 0.440 | 1.414 | 0.069 | 0.169 |
| GO_POSITIVE_REGULATION_OF_REACTIVE_OXYGEN_SPECIES_METABOLIC_PROCESS         | 84  | 0.356 | 1.414 | 0.068 | 0.170 |
| GO_FILAMENTOUS_ACTIN                                                        | 19  | 0.474 | 1.413 | 0.115 | 0.170 |
| GO_REGULATION_OF_LYMPHOCYTE_MIGRATION                                       | 36  | 0.469 | 1.413 | 0.125 | 0.170 |
| GO_REGULATION_OF_CANONICAL_WINT_SIGNALING_PATHWAY                           | 228 | 0.304 | 1.413 | 0.042 | 0.170 |
| GO_CATECHOLAMINE_BINDING                                                    | 15  | 0.508 | 1.412 | 0.076 | 0.170 |
| GO_BIOMINERAL_TISSUE_DEVELOPMENT                                            | 72  | 0.360 | 1.412 | 0.047 | 0.170 |
| GO_RUFFLE                                                                   | 152 | 0.336 | 1.412 | 0.058 | 0.171 |
| GO_PROTEIN_TRIMERIZATION                                                    | 38  | 0.408 | 1.411 | 0.107 | 0.171 |
| GO_REGULATION_OF_EXTRINSIC_APOPTOTIC_SIGNALING_PATHWAY_IN_ABSENCE_OF_LIGAND | 46  | 0.402 | 1.411 | 0.081 | 0.171 |
| GO_NEGATIVE_REGULATION_OF_CYTOKINE_SECRETION                                | 40  | 0.444 | 1.411 | 0.103 | 0.171 |
| GO_Glutamate_Receptor_Binding                                               | 37  | 0.395 | 1.410 | 0.091 | 0.171 |
| GO_GENITALIA_DEVELOPMENT                                                    | 42  | 0.394 | 1.410 | 0.073 | 0.172 |
| GO_REGULATION_OF_CARDIAC_MUSCLE_CELL_ACTION_POTENTIAL                       | 19  | 0.472 | 1.409 | 0.094 | 0.172 |
| GO_INTRASPECIES_INTERACTION_BETWEEN_ORGANISMS                               | 45  | 0.391 | 1.409 | 0.080 | 0.172 |
| GO_POSITIVE_REGULATION_OF_BINDING                                           | 125 | 0.316 | 1.409 | 0.024 | 0.172 |
| GO_ENDOCYTIC_VESICLE                                                        | 251 | 0.325 | 1.409 | 0.057 | 0.173 |
| GO_REGULATION_OF_ESTABLISHMENT_OR_MAINTENANCE_OF_CELL_POLARITY              | 20  | 0.466 | 1.408 | 0.089 | 0.173 |
| GO_T_CELL_DIFFERENTIATION_INVOLVED_IN_IMMUNE_RESPONSE                       | 29  | 0.457 | 1.408 | 0.119 | 0.173 |
| GO_REGULATION_OF_B_CELL_DIFFERENTIATION                                     | 21  | 0.535 | 1.408 | 0.156 | 0.173 |
| GO_POSITIVE_REGULATION_OF_CELL_ACTIVATION                                   | 279 | 0.379 | 1.408 | 0.131 | 0.173 |
| GO_VENTRICULAR_SEPTUM_MORPHOGENESIS                                         | 27  | 0.445 | 1.408 | 0.109 | 0.173 |
| GO_CRANIAL_NERVE_DEVELOPMENT                                                | 42  | 0.388 | 1.407 | 0.087 | 0.174 |

|                                                                                                    |     |       |       |       |       |
|----------------------------------------------------------------------------------------------------|-----|-------|-------|-------|-------|
| GO_RECEPTOR_ACTIVATOR_ACTIVITY                                                                     | 32  | 0.388 | 1.406 | 0.040 | 0.174 |
| GO_PHOSPHATIDYLINOSITOL_3_4_BIS<br>PHOSPHATE_BINDING                                               | 19  | 0.476 | 1.406 | 0.077 | 0.174 |
| GO_MYELOID_LEUKOCYTE_ACTIVATI<br>ON                                                                | 95  | 0.411 | 1.405 | 0.145 | 0.174 |
| GO_SPHINGOLIPID_BIOSYNTHETIC_PR<br>OCESS                                                           | 71  | 0.351 | 1.405 | 0.047 | 0.174 |
| GO_ENZYME_INHIBITOR_ACTIVITY                                                                       | 356 | 0.313 | 1.405 | 0.042 | 0.174 |
| GO_NEGATIVE_REGULATION_OF_CATI<br>ON_CHANNEL_ACTIVITY                                              | 32  | 0.389 | 1.405 | 0.071 | 0.174 |
| GO_LOW_DENSITY_LIPOPROTEIN_PAR<br>TICLE_BINDING                                                    | 15  | 0.514 | 1.404 | 0.109 | 0.175 |
| GO_LYMPHOCYTE_MIGRATION                                                                            | 48  | 0.493 | 1.403 | 0.133 | 0.175 |
| GO_REGULATION_OF_ERYTHROCYTE_<br>DIFFERENTIATION                                                   | 36  | 0.387 | 1.403 | 0.070 | 0.176 |
| GO_REGULATION_OF_INTERLEUKIN_5<br>_PRODUCTION                                                      | 16  | 0.488 | 1.403 | 0.102 | 0.176 |
| GO_POSITIVE_REGULATION_OF_G_PR<br>OTEIN_COUPLED_RECEPTOR_PROTEIN<br>_SIGNALING_PATHWAY             | 23  | 0.456 | 1.403 | 0.093 | 0.176 |
| GO_DORSAL_VENTRAL_NEURAL_TUB<br>E_PATTERNING                                                       | 16  | 0.502 | 1.403 | 0.090 | 0.176 |
| GO_CALCIIUM_DEPENDENT_PROTEIN_<br>BINDING                                                          | 58  | 0.364 | 1.402 | 0.063 | 0.176 |
| GO_POSITIVE_REGULATION_OF_EXTRI<br>NSIC_APOPTOTIC_SIGNALING_PATHW<br>AY_VIA_DEATH_DOMAIN_RECEPTORS | 16  | 0.500 | 1.402 | 0.084 | 0.176 |
| GO_DENDRITE_CYTOPLASM                                                                              | 16  | 0.490 | 1.402 | 0.083 | 0.176 |
| GO_PITUITARY_GLAND_DEVELOPMEN<br>T                                                                 | 42  | 0.398 | 1.402 | 0.061 | 0.176 |
| GO_LAMELLIPODIUM_ORGANIZATION                                                                      | 34  | 0.392 | 1.402 | 0.089 | 0.176 |
| GO_REGULATION_OF_INTERLEUKIN_1<br>_PRODUCTION                                                      | 56  | 0.425 | 1.401 | 0.095 | 0.176 |
| GO_NEGATIVE_REGULATION_OF_EPIT<br>HELIAL_TO_MESENCHYMAL_TRANSIT<br>ION                             | 22  | 0.445 | 1.401 | 0.100 | 0.176 |
| GO_SIGNAL_TRANSDUCTION_BY_PRO<br>TEIN_PHOSPHORYLATION                                              | 394 | 0.280 | 1.401 | 0.023 | 0.176 |
| GO_POSITIVE_REGULATION_OF_STER<br>OL_TRANSPORT                                                     | 17  | 0.474 | 1.400 | 0.102 | 0.177 |
| GO_CELLULAR_GLUCOSE_HOMEOSTA<br>SIS                                                                | 71  | 0.359 | 1.399 | 0.071 | 0.177 |
| GO_ACTIN_POLYMERIZATION_OR_DEP<br>OLYMERIZATION                                                    | 35  | 0.419 | 1.399 | 0.095 | 0.177 |

|                                                                               |     |       |       |       |       |
|-------------------------------------------------------------------------------|-----|-------|-------|-------|-------|
| GO_SENSORY_PERCEPTION_OF_LIGHT_STIMULUS                                       | 203 | 0.346 | 1.399 | 0.080 | 0.177 |
| GO_GABAERGIC_NEURON_DIFFERENTIATION                                           | 15  | 0.531 | 1.399 | 0.097 | 0.177 |
| GO_RESPONSE_TO_EPINEPHRINE                                                    | 16  | 0.499 | 1.399 | 0.094 | 0.178 |
| GO_POSITIVE_REGULATION_OF_REPRODUCTIVE_PROCESS                                | 51  | 0.377 | 1.399 | 0.081 | 0.177 |
| GO_ERK1_AND_ERK2_CASCADE                                                      | 22  | 0.431 | 1.398 | 0.095 | 0.178 |
| GO_LEUKOCYTE_PROLIFERATION                                                    | 73  | 0.424 | 1.397 | 0.142 | 0.178 |
| GO_REGULATION_OF_SKELETAL_MUSCLE_TISSUE_DEVELOPMENT                           | 46  | 0.391 | 1.397 | 0.075 | 0.178 |
| GO_SECONDARY_METABOLITE_BIOSYNTHETIC_PROCESS                                  | 20  | 0.470 | 1.397 | 0.120 | 0.178 |
| GO_CELLULAR_RESPONSE_TO_EXTERNAL_STIMULUS                                     | 256 | 0.296 | 1.397 | 0.043 | 0.178 |
| GO_REGULATION_OF_HOMOTYPIC_CELL_CELL_ADHESION                                 | 289 | 0.366 | 1.397 | 0.142 | 0.178 |
| GO_MECHANORECEPTOR_DIFFERENTIATION                                            | 49  | 0.365 | 1.397 | 0.055 | 0.178 |
| GO_RESPONSE_TO_ACETYLCHOLINE                                                  | 17  | 0.474 | 1.396 | 0.081 | 0.179 |
| GO_STARTLE_RESPONSE                                                           | 24  | 0.451 | 1.396 | 0.118 | 0.179 |
| GO_REGULATION_OF_GLIOGENESIS                                                  | 88  | 0.335 | 1.396 | 0.037 | 0.179 |
| GO_POSITIVE_REGULATION_OF_CYTOSKELETON_ORGANIZATION                           | 166 | 0.308 | 1.394 | 0.052 | 0.180 |
| GO_THYMOCYTE_AGGREGATION                                                      | 45  | 0.424 | 1.394 | 0.119 | 0.180 |
| GO_PEPTIDE_HORMONE_RECEPTOR_BINDING                                           | 17  | 0.485 | 1.393 | 0.067 | 0.180 |
| GO_NEGATIVE_REGULATION_OF_CYTOKINE_PRODUCTION                                 | 196 | 0.344 | 1.393 | 0.099 | 0.181 |
| GO_OXYGEN_BINDING                                                             | 44  | 0.422 | 1.393 | 0.115 | 0.181 |
| GO_NEGATIVE_REGULATION_OF_MAPK_CASCADE                                        | 143 | 0.306 | 1.393 | 0.039 | 0.181 |
| GO_POSITIVE_REGULATION_OF_BEHAVIOR                                            | 23  | 0.468 | 1.392 | 0.074 | 0.181 |
| GO_NEGATIVE_REGULATION_OF_PRODUCTION_OF_MOLECULAR_MEDIATOR_OF_IMMUNE_RESPONSE | 26  | 0.453 | 1.392 | 0.106 | 0.181 |
| GO_NEGATIVE_REGULATION_OFSTEM_CELL_DIFFERENTIATION                            | 41  | 0.378 | 1.391 | 0.101 | 0.182 |
| GO_RESPONSE_TO_AUDITORY_STIMULUS                                              | 23  | 0.453 | 1.391 | 0.088 | 0.182 |
| GO_BHLH_TRANSCRIPTION_FACTOR_BINDING                                          | 27  | 0.429 | 1.391 | 0.104 | 0.182 |
| GO_REGULATION_OF_ODONTOGENESIS                                                | 24  | 0.450 | 1.391 | 0.073 | 0.182 |



## S

---

|                                                                              |     |       |       |       |       |
|------------------------------------------------------------------------------|-----|-------|-------|-------|-------|
| GO_NEGATIVE_REGULATION_OF_ACTI<br>N_FILAMENT_POLYMERIZATION                  | 42  | 0.386 | 1.390 | 0.085 | 0.183 |
| GO_BLOOD_COAGULATION_FIBRIN_C<br>LOT_FORMATION                               | 23  | 0.536 | 1.390 | 0.109 | 0.183 |
| GO_FATTY_ACID_DERIVATIVE_METAB<br>OLIC_PROCESS                               | 92  | 0.354 | 1.390 | 0.083 | 0.183 |
| GO_LEUKOTRIENE_METABOLIC_PROC<br>ESS                                         | 30  | 0.424 | 1.389 | 0.100 | 0.183 |
| GO_REGULATION_OF_FIBROBLAST_PR<br>OLIFERATION                                | 80  | 0.339 | 1.389 | 0.076 | 0.183 |
| GO_CELLULAR_RESPONSE_TO_OSMOT<br>IC_STRESS                                   | 20  | 0.458 | 1.388 | 0.116 | 0.183 |
| GO_PARASYMPATHETIC_NERVOUS_SY<br>STEM_DEVELOPMENT                            | 16  | 0.507 | 1.388 | 0.099 | 0.184 |
| GO_REGULATION_OF_CELL_CELL_AD<br>HESION                                      | 359 | 0.342 | 1.388 | 0.137 | 0.184 |
| GO_PROTEIN_KINASE_A_BINDING                                                  | 41  | 0.374 | 1.387 | 0.081 | 0.184 |
| GO_REGULATION_OF_T_CELL_MIGRAT<br>ION                                        | 24  | 0.466 | 1.387 | 0.128 | 0.184 |
| GO_METALLOPEPTIDASE_ACTIVITY                                                 | 177 | 0.305 | 1.387 | 0.050 | 0.184 |
| GO_CELLULAR_RESPONSE_TO_PEPTID<br>E                                          | 265 | 0.294 | 1.387 | 0.044 | 0.184 |
| GO_PHARYNGEAL_SYSTEM_DEVELOP<br>MENT                                         | 16  | 0.500 | 1.386 | 0.101 | 0.184 |
| GO_EMBRYONIC_SKELETAL_SYSTEM_<br>MORPHOGENESIS                               | 92  | 0.364 | 1.386 | 0.103 | 0.184 |
| GO_ADRENAL_GLAND_DEVELOPMEN<br>T                                             | 23  | 0.445 | 1.386 | 0.091 | 0.184 |
| GO_GAMMA_AMINOBUTYRIC_ACID_SI<br>GNALING_PATHWAY                             | 23  | 0.468 | 1.386 | 0.112 | 0.184 |
| GO_DETECTION_OF_TEMPERATURE_S<br>TIMULUS                                     | 16  | 0.484 | 1.386 | 0.094 | 0.184 |
| GO_NEURON_FATE_COMMITMENT                                                    | 66  | 0.388 | 1.385 | 0.084 | 0.185 |
| GO_EYE_PHOTORECEPTOR_CELL_DIFF<br>ERENTIATION                                | 40  | 0.390 | 1.385 | 0.088 | 0.184 |
| GO_REGULATION_OF_VACUOLAR_TRA<br>NSPORT                                      | 29  | 0.424 | 1.385 | 0.115 | 0.185 |
| GO_REGULATION_OF_PRODUCTION_O<br>F_MOLECULAR_MEDIATOR_OF_IMMU<br>NE_RESPONSE | 94  | 0.373 | 1.385 | 0.129 | 0.185 |
| GO_POSITIVE_REGULATION_OF_PROT<br>EIN_AUTOPHOSPHORYLATION                    | 20  | 0.422 | 1.385 | 0.089 | 0.185 |
| GO_POSITIVE_REGULATION_OF_POTA                                               | 37  | 0.413 | 1.385 | 0.103 | 0.185 |

---

|                                                                     |     |       |       |       |       |
|---------------------------------------------------------------------|-----|-------|-------|-------|-------|
| SSIIUM_ION_TRANSPORT                                                |     |       |       |       |       |
| GO_REGULATION_OF_MAST_CELL_ACTIVATION                               | 38  | 0.439 | 1.383 | 0.143 | 0.186 |
| GO_RESPONSE_TO_INORGANIC_SUBSTANCE                                  | 467 | 0.276 | 1.383 | 0.017 | 0.186 |
| GO_SIGNAL_RELEASE                                                   | 165 | 0.338 | 1.382 | 0.093 | 0.187 |
| GO_CELL_PROLIFERATION_IN_FOREBRAIN                                  | 27  | 0.424 | 1.382 | 0.116 | 0.187 |
| GO_APOPTOTIC_CELL_CLEARANCE                                         | 27  | 0.447 | 1.381 | 0.107 | 0.187 |
| GO_NEGATIVE_REGULATION_OF_HOMOTYPIC_CELL_CELL_ADHESION              | 94  | 0.370 | 1.380 | 0.121 | 0.188 |
| GO_COCHLEA_MORPHOGENESIS                                            | 21  | 0.453 | 1.379 | 0.108 | 0.189 |
| GO_NEGATIVE_REGULATION_OF_REACTIVE_OXYGEN_SPECIES_METABOLIC_PROCESS | 40  | 0.386 | 1.379 | 0.071 | 0.189 |
| GO_REGIONALIZATION                                                  | 304 | 0.308 | 1.379 | 0.062 | 0.189 |
| GO_REGULATION_OF_PROTEIN_LOCALIZATION_TO_NUCLEUS                    | 211 | 0.299 | 1.379 | 0.041 | 0.189 |
| GO_ENDOCRINE_SYSTEM_DEVELOPMENT                                     | 123 | 0.333 | 1.379 | 0.046 | 0.189 |
| GO_CYTOPLASMIC_REGION                                               | 270 | 0.295 | 1.379 | 0.044 | 0.189 |
| GO_MAMMARY_GLAND_EPITHELIUM_DEVELOPMENT                             | 53  | 0.364 | 1.378 | 0.083 | 0.190 |
| GO_SEROTONIN_RECEPTOR_ACTIVITY                                      | 18  | 0.514 | 1.378 | 0.114 | 0.190 |
| GO_POSITIVE_REGULATION_OF_PROTEIN_SECRETION                         | 202 | 0.322 | 1.377 | 0.059 | 0.190 |
| GO_CELLULAR_RESPONSE_TO_ORGANIC_CYCLIC_COMPOUND                     | 445 | 0.276 | 1.376 | 0.021 | 0.190 |
| GO_PURINE_CONTAINING_COMPOUND_CATABOLIC_PROCESS                     | 48  | 0.354 | 1.376 | 0.074 | 0.190 |
| GO_CEREBRAL_CORTEX_RADIALY_ORIENTED_CELL_MIGRATION                  | 27  | 0.425 | 1.376 | 0.095 | 0.191 |
| GO GRANULOCYTE MIGRATION                                            | 71  | 0.408 | 1.376 | 0.128 | 0.191 |
| GO_LEUKOCYTE_CELL_CELL_ADHESION                                     | 238 | 0.375 | 1.376 | 0.139 | 0.191 |
| GO_REGULATION_OF_T_HELPER_CELL_DIFFERENTIATION                      | 26  | 0.465 | 1.375 | 0.149 | 0.191 |
| GO_POSITIVE_REGULATION_OF_ACTIN_CYTOSKELETON_REORGANIZATION         | 16  | 0.482 | 1.375 | 0.107 | 0.191 |
| GO_PRIMARY_CILIUM                                                   | 191 | 0.327 | 1.373 | 0.103 | 0.193 |
| GO_CHEMOKINE_MEDIATED_SIGNALING_PATHWAY                             | 66  | 0.454 | 1.373 | 0.137 | 0.193 |
| GO_POSITIVE_REGULATION_OF_PROTEIN_DEACETYLATION                     | 18  | 0.452 | 1.372 | 0.106 | 0.193 |

|                                                                    |     |       |       |       |       |
|--------------------------------------------------------------------|-----|-------|-------|-------|-------|
| GO_REGULATION_OF_HORMONE_LEVELS                                    | 458 | 0.295 | 1.372 | 0.044 | 0.193 |
| GO_REGULATION_OF_REGULATED_SECRETORY_PATHWAY                       | 126 | 0.323 | 1.372 | 0.049 | 0.193 |
| GO_PHAGOCYTOSIS                                                    | 158 | 0.352 | 1.372 | 0.114 | 0.193 |
| GO_WNT_SIGNALING_PATHWAY_CALCINIUM_MODULATING_PATHWAY              | 34  | 0.384 | 1.371 | 0.095 | 0.194 |
| GO_GLUCOCORTICOID_METABOLIC_PROCESS                                | 16  | 0.493 | 1.370 | 0.101 | 0.194 |
| GO_NEURON_FATE_SPECIFICATION                                       | 31  | 0.445 | 1.369 | 0.097 | 0.196 |
| GO_MEMBRANE_RAFT_ORGANIZATION                                      | 17  | 0.476 | 1.368 | 0.112 | 0.196 |
| GO_PROTEASE_BINDING                                                | 98  | 0.351 | 1.367 | 0.100 | 0.197 |
| GO_NEGATIVE_REGULATION_OF_MAP_KINASE_ACTIVITY                      | 73  | 0.331 | 1.367 | 0.086 | 0.197 |
| GO_GAP_JUNCTION                                                    | 30  | 0.433 | 1.367 | 0.116 | 0.197 |
| GO_STEROID_BINDING                                                 | 89  | 0.359 | 1.367 | 0.063 | 0.197 |
| GO_POSITIVE_REGULATION_OF_TRANSCRIPTION_FACTOR_IMPORT_INTO_NUCLEUS | 49  | 0.374 | 1.366 | 0.103 | 0.197 |
| GO_NEGATIVE_REGULATION_OF_MYELOID_LEUKOCYTE_DIFFERENTIATION        | 43  | 0.391 | 1.366 | 0.106 | 0.197 |
| GO_RUFFLE_MEMBRANE                                                 | 78  | 0.335 | 1.366 | 0.082 | 0.197 |
| GO_RESPONSE_TO_MUSCLE_ACTIVITY                                     | 17  | 0.441 | 1.366 | 0.109 | 0.197 |
| GO_NEPHRON_TUBULE_FORMATION                                        | 18  | 0.482 | 1.365 | 0.113 | 0.198 |
| GO_POSITIVE_REGULATION_OF_PHOSPHOPROTEIN_PHOSPHATASE_ACTIVITY      | 15  | 0.522 | 1.364 | 0.142 | 0.199 |
| GO_SERINE_TYPE_ENDOPEPTIDASE_INHIBITOR_ACTIVITY                    | 89  | 0.394 | 1.364 | 0.105 | 0.199 |
| GO_MAMMARY_GLAND_DUCT_MORPHOGENESIS                                | 28  | 0.416 | 1.364 | 0.119 | 0.199 |
| GO_POSITIVE_REGULATION_OF_SKELETAL_MUSCLE_TISSUE_DEVELOPMENT       | 25  | 0.423 | 1.363 | 0.103 | 0.199 |
| GO_POTASSIUM_ION_HOMEOSTASIS                                       | 18  | 0.471 | 1.363 | 0.114 | 0.199 |
| GO_REGULATION_OF_INTERLEUKIN_8_SECRETION                           | 18  | 0.485 | 1.363 | 0.129 | 0.199 |
| GO_PLACENTA_BLOOD_VESSEL_DEVELOPMENT                               | 28  | 0.414 | 1.363 | 0.103 | 0.199 |
| GO_RESPONSE_TO_ACIDIC_PH                                           | 17  | 0.463 | 1.363 | 0.111 | 0.199 |
| GO_ARACHIDONIC_ACID_METABOLIC_PROCESS                              | 50  | 0.380 | 1.362 | 0.110 | 0.200 |
| GO_REGULATION_OF_INTERLEUKIN_1                                     | 31  | 0.450 | 1.361 | 0.134 | 0.200 |

| <hr/>                                                     |     |       |       |       |       |
|-----------------------------------------------------------|-----|-------|-------|-------|-------|
| _SECRETION                                                |     |       |       |       |       |
| GO_NUCLEAR_OUTER_MEMBRANE                                 | 19  | 0.418 | 1.361 | 0.108 | 0.201 |
| GO_SENSORY_PERCEPTION_OF_TEMPERATURE_STIMULUS             | 20  | 0.463 | 1.361 | 0.108 | 0.200 |
| GO_RECEPTOR_SIGNALING_PROTEIN_ACTIVITY                    | 165 | 0.307 | 1.361 | 0.065 | 0.200 |
| GO_HEPARAN_SULFATE_PROTEOGLYCAN_METABOLIC_PROCESS         | 28  | 0.436 | 1.361 | 0.140 | 0.200 |
| GO_REGULATION_OF_NEURON_PROJECTION_REGENERATION           | 20  | 0.451 | 1.360 | 0.126 | 0.201 |
| GO_ESTABLISHMENT_OR_MAINTENANCE_OF_BIPOLAR_CELL_POLARITY  | 34  | 0.368 | 1.359 | 0.082 | 0.201 |
| GO_RESPONSE_TO_BACTERIUM                                  | 464 | 0.319 | 1.359 | 0.088 | 0.202 |
| GO_NUCLEUS_LOCALIZATION                                   | 20  | 0.431 | 1.359 | 0.112 | 0.202 |
| GO_TERMINAL_BOUTON                                        | 63  | 0.386 | 1.358 | 0.090 | 0.202 |
| GO_ADULT_LOCOMOTORY_BEHAVIOR                              | 79  | 0.365 | 1.358 | 0.107 | 0.202 |
| GO_NEGATIVE_REGULATION_OF_ALPHA_BETA_T_CELL_ACTIVATION    | 22  | 0.450 | 1.358 | 0.125 | 0.202 |
| GO_REGULATION_OF_ALPHA_BETA_T_CELL_DIFFERENTIATION        | 46  | 0.420 | 1.357 | 0.146 | 0.203 |
| GO_SOLUTE_CATION_ANTIPORTER_ACTIVITY                      | 28  | 0.406 | 1.357 | 0.091 | 0.203 |
| GO_SCHWANN_CELL_DIFFERENTIATION                           | 30  | 0.421 | 1.357 | 0.114 | 0.203 |
| GO_POSITIVE_REGULATION_OF_PROTEIN_IMPORT                  | 101 | 0.318 | 1.357 | 0.065 | 0.203 |
| GO_REGULATION_OF_TRANSCRIPTION_FACTOR_IMPORT_INTO_NUCLEUS | 92  | 0.334 | 1.357 | 0.073 | 0.203 |
| GO_NEUROMUSCULAR_PROCESS_CONTROL_POSTURE                  | 15  | 0.469 | 1.356 | 0.114 | 0.203 |
| GO_SOMATIC_STEM_CELL_POPULATION_MAINTENANCE               | 66  | 0.341 | 1.355 | 0.088 | 0.204 |
| GO_STRUCTURAL_CONSTITUENT_OF_EYE_LENS                     | 19  | 0.497 | 1.355 | 0.118 | 0.204 |
| GO_ENERGY_RESERVE_METABOLIC_PROCESS                       | 70  | 0.356 | 1.355 | 0.093 | 0.204 |
| GO_RETINA_MORPHOGENESIS_IN_CAMERA_TYPE_EYE                | 43  | 0.376 | 1.354 | 0.102 | 0.204 |
| GO_STABILIZATION_OF_MEMBRANE_POTENTIAL                    | 15  | 0.497 | 1.354 | 0.105 | 0.204 |
| GO_IONOTROPIC_Glutamate_Receptor_Complex                  | 47  | 0.396 | 1.354 | 0.120 | 0.204 |
| GO_NEGATIVE_REGULATION_OF_PROTEIN_POLYMERIZATION          | 53  | 0.349 | 1.353 | 0.100 | 0.205 |

|                                                                                                                                                                     |     |       |       |       |       |
|---------------------------------------------------------------------------------------------------------------------------------------------------------------------|-----|-------|-------|-------|-------|
| GO_LIPID_TRANSLOCATION                                                                                                                                              | 21  | 0.463 | 1.353 | 0.127 | 0.205 |
| GO_CAMP_BINDING                                                                                                                                                     | 21  | 0.464 | 1.353 | 0.133 | 0.205 |
| GO_MUSCLE_MYOSIN_COMPLEX                                                                                                                                            | 19  | 0.508 | 1.353 | 0.138 | 0.205 |
| GO_REGULATION_OF_SYNAPTIC_VESICLE_TRANSPORT                                                                                                                         | 28  | 0.435 | 1.353 | 0.150 | 0.205 |
| GO_MONOCARBOXYLIC_ACID_BIOSYNTHETIC_PROCESS                                                                                                                         | 158 | 0.304 | 1.353 | 0.064 | 0.205 |
| GO_REGULATION_OF_MULTICELLULAR_ORGANISM_GROWTH                                                                                                                      | 64  | 0.345 | 1.352 | 0.063 | 0.205 |
| GO_EPIBOLY                                                                                                                                                          | 20  | 0.460 | 1.351 | 0.127 | 0.206 |
| GO_FLUID_TRANSPORT                                                                                                                                                  | 26  | 0.414 | 1.351 | 0.112 | 0.206 |
| GO_MYOSIN_FILAMENT                                                                                                                                                  | 22  | 0.491 | 1.350 | 0.138 | 0.207 |
| GO_RHO_GUANYL_NUCLEOTIDE_EXCHANGE_FACTOR_ACTIVITY                                                                                                                   | 75  | 0.377 | 1.350 | 0.127 | 0.206 |
| GO_CANONICAL_WNT_SIGNALING_PATHWAY                                                                                                                                  | 92  | 0.338 | 1.350 | 0.113 | 0.206 |
| GO_OXIDOREDUCTASE_ACTIVITY_ACTING_ON_PAIRED_DONORS_WITH_INCORPORATION_OR_REDUCTION_OF_MOLECULAR_OXYGEN_NAD_P_H_AS_ONE_DONOR_AND_INCORPORATION_OF_ONE_ATOM_OF_OXYGEN | 37  | 0.402 | 1.350 | 0.135 | 0.207 |
| GO_SYNAPTIC_VESICLE_CYCLE                                                                                                                                           | 85  | 0.352 | 1.349 | 0.097 | 0.207 |
| GO_REGULATION_OF_REACTIVE_OXYGEN_SPECIES_BIOSYNTHETIC_PROCESSES                                                                                                     | 64  | 0.358 | 1.349 | 0.122 | 0.207 |
| GO_INSULIN_RECEPTOR_BINDING                                                                                                                                         | 31  | 0.409 | 1.349 | 0.104 | 0.208 |
| GO_ENDOTHELIAL_CELL_PROLIFERATION                                                                                                                                   | 23  | 0.432 | 1.348 | 0.117 | 0.208 |
| GO_POSITIVE_REGULATION_OF_CYTOKINE_SECRETION                                                                                                                        | 92  | 0.379 | 1.347 | 0.123 | 0.209 |
| GO_REGULATION_OF_PEPTIDE_TRANSPORT                                                                                                                                  | 244 | 0.291 | 1.347 | 0.033 | 0.209 |
| GO_EMBRYONIC_CRANIAL_SKELETON_MORPHOGENESIS                                                                                                                         | 46  | 0.386 | 1.347 | 0.104 | 0.209 |
| GO_UNSATURATED_FATTY_ACID_BIOSYNTHETIC_PROCESS                                                                                                                      | 53  | 0.364 | 1.346 | 0.100 | 0.210 |
| GO_NEGATIVE_REGULATION_OF_MEIOTIC_CELL_CYCLE                                                                                                                        | 18  | 0.426 | 1.345 | 0.096 | 0.211 |
| GO_NEURAL_TUBE_DEVELOPMENT                                                                                                                                          | 145 | 0.305 | 1.345 | 0.087 | 0.210 |
| GO_CELLULAR_RESPONSE_TO_FLUID_SHEAR_STRESS                                                                                                                          | 18  | 0.457 | 1.344 | 0.144 | 0.211 |
| GO_LYSOSOME_LOCALIZATION                                                                                                                                            | 23  | 0.432 | 1.344 | 0.139 | 0.211 |
| GO_NEGATIVE_REGULATION_OF_I_KA                                                                                                                                      | 49  | 0.376 | 1.344 | 0.093 | 0.211 |

---

|                                                                                                   |     |       |       |       |       |
|---------------------------------------------------------------------------------------------------|-----|-------|-------|-------|-------|
| PPAB_KINASE_NF_KAPPAB_SIGNALIN                                                                    |     |       |       |       |       |
| G                                                                                                 |     |       |       |       |       |
| GO_MODIFIED_AMINO_ACID_BINDING                                                                    | 62  | 0.328 | 1.344 | 0.058 | 0.211 |
| GO_POSITIVE_REGULATION_OF_CHEMOKINE_PRODUCTION                                                    | 49  | 0.412 | 1.343 | 0.131 | 0.211 |
| GO_NEGATIVE_REGULATION_OF_ENDOCYTOSIS                                                             | 37  | 0.396 | 1.342 | 0.116 | 0.212 |
| GO_RESPONSE_TO_NUTRIENT                                                                           | 189 | 0.288 | 1.342 | 0.037 | 0.212 |
| GO_BRANCHING_INVOLVED_IN_SALIVARY_GLAND_MORPHOGENESIS                                             | 16  | 0.530 | 1.342 | 0.151 | 0.212 |
| GO_SOMATIC_STEM_CELL_DIVISION                                                                     | 22  | 0.444 | 1.342 | 0.131 | 0.212 |
| GO_TISSUE_HOMEOSTASIS                                                                             | 158 | 0.293 | 1.342 | 0.049 | 0.212 |
| GO_ENZYME_ACTIVATOR_ACTIVITY                                                                      | 451 | 0.271 | 1.341 | 0.057 | 0.213 |
| GO_POST_EMBRYONIC_DEVELOPMENT                                                                     | 86  | 0.328 | 1.341 | 0.086 | 0.213 |
| GO_LEUKOCYTE_ACTIVATION                                                                           | 391 | 0.354 | 1.341 | 0.159 | 0.213 |
| GO_POTASSIUM_ION_IMPORT                                                                           | 29  | 0.416 | 1.341 | 0.127 | 0.213 |
| GO_LONG_TERM_SYNAPTIC_DEPRESSION                                                                  | 15  | 0.440 | 1.340 | 0.128 | 0.213 |
| GO_REGULATION_OF_PEPTIDE_SECRETION                                                                | 198 | 0.297 | 1.340 | 0.060 | 0.213 |
| GO_PROTEIN_HOMOLOGOMERIZATION                                                                     | 242 | 0.272 | 1.339 | 0.021 | 0.214 |
| GO_ALKALI_METAL_ION_BINDING                                                                       | 20  | 0.444 | 1.339 | 0.128 | 0.214 |
| GO_REGULATION_OF_LONG_TERM_NEURONAL_SYNAPTIC_PLASTICITY                                           | 23  | 0.434 | 1.338 | 0.115 | 0.215 |
| GO_POSITIVE_REGULATION_OF_CYTOKINE_PRODUCTION_INVOLVED_IN_IMMUNE_RESPONSE                         | 30  | 0.413 | 1.337 | 0.150 | 0.215 |
| GO_POSITIVE_REGULATION_OF_CELL_CELL_ADHESION                                                      | 231 | 0.355 | 1.337 | 0.169 | 0.215 |
| GO_CLATHRIN_BINDING                                                                               | 62  | 0.357 | 1.337 | 0.103 | 0.215 |
| GO_TRANSCRIPTIONAL_ACTIVATOR_ACTIVITY_RNA_POLYMERASE_II_DISTAL_ENHANCER_SEQUENCE_SPECIFIC_BINDING | 24  | 0.404 | 1.337 | 0.126 | 0.215 |
| GO_NEGATIVE_REGULATION_OF_MYELOID_CELL_DIFFERENTIATION                                            | 83  | 0.325 | 1.337 | 0.090 | 0.215 |
| GO_PHOSPHOLIPID_BINDING                                                                           | 342 | 0.277 | 1.337 | 0.044 | 0.215 |
| GO_INDOLE_CONTAINING_COMPOUND_METABOLIC_PROCESS                                                   | 25  | 0.417 | 1.336 | 0.128 | 0.216 |
| GO_REGULATION_OF_CARBOHYDRATE_BIOSYNTHETIC_PROCESS                                                | 79  | 0.322 | 1.336 | 0.069 | 0.216 |
| GO_FAT_CELL_DIFFERENTIATION                                                                       | 101 | 0.326 | 1.336 | 0.093 | 0.215 |

|                                                                                 |     |       |       |       |       |
|---------------------------------------------------------------------------------|-----|-------|-------|-------|-------|
| GO_TRANSLATION_REPRESSOR_ACTIVITY                                               | 20  | 0.459 | 1.336 | 0.150 | 0.216 |
| GO_POSITIVE_REGULATION_OF_GROWTH                                                | 227 | 0.282 | 1.336 | 0.063 | 0.216 |
| GO_POSITIVE_REGULATION_OF_ORGAN_GROWTH                                          | 36  | 0.384 | 1.335 | 0.102 | 0.217 |
| GO_AGING                                                                        | 259 | 0.283 | 1.335 | 0.046 | 0.217 |
| GO_SODIUM_ION_HOMEOSTASIS                                                       | 30  | 0.429 | 1.334 | 0.112 | 0.217 |
| GO_POSITIVE_REGULATION_OF_COAGULATION                                           | 24  | 0.461 | 1.334 | 0.158 | 0.218 |
| GO_DOPAMINERGIC_NEURON_DIFFERENTIATION                                          | 27  | 0.415 | 1.333 | 0.118 | 0.218 |
| GO_RESPONSE_TO_REACTIVE_OXYGEN_SPECIES                                          | 187 | 0.305 | 1.333 | 0.079 | 0.218 |
| GO_POSITIVE_REGULATION_OF_T_Helper_1_Type_Immune_Response                       | 15  | 0.504 | 1.332 | 0.178 | 0.218 |
| GO_RESPONSE_TO_METAL_ION                                                        | 324 | 0.273 | 1.332 | 0.028 | 0.218 |
| GO_TETRAPYRROLE_BINDING                                                         | 128 | 0.321 | 1.332 | 0.099 | 0.218 |
| GO_POSITIVE_REGULATION_OF_NEUROBLAST_PROLIFERATION                              | 20  | 0.428 | 1.332 | 0.126 | 0.219 |
| GO_CELLULAR_DEFENSE_RESPONSE                                                    | 56  | 0.438 | 1.332 | 0.195 | 0.218 |
| GO_NEGATIVE_REGULATION_OF_LEUKOCYTE_MEDIATED_IMMUNITY                           | 44  | 0.431 | 1.332 | 0.180 | 0.218 |
| GO_NEGATIVE_REGULATION_OF_CELL_CELL_ADHESION                                    | 129 | 0.330 | 1.331 | 0.133 | 0.219 |
| GO_POSITIVE_REGULATION_OF_MESENCHYMAL_CELL_PROLIFERATION                        | 27  | 0.443 | 1.331 | 0.117 | 0.219 |
| GO_REGULATION_OF_LIPID_METABOLIC_PROCESS                                        | 268 | 0.288 | 1.331 | 0.071 | 0.219 |
| GO_STEM_CELL_PROLIFERATION                                                      | 60  | 0.367 | 1.329 | 0.092 | 0.221 |
| GO_NEGATIVE_REGULATION_OF_COAGULATION                                           | 48  | 0.455 | 1.329 | 0.157 | 0.221 |
| GO_REGULATION_OF_EPITHELIAL_CELL_DIFFERENTIATION_INVOLVED_IN_KIDNEY_DEVELOPMENT | 15  | 0.474 | 1.328 | 0.148 | 0.221 |
| GO_EMBRYONIC_SKELETAL_SYSTEM_DEVELOPMENT                                        | 120 | 0.338 | 1.328 | 0.134 | 0.221 |
| GO_NEGATIVE_REGULATION_OF_PROTEIN_SERINE_THREONINE_KINASE_ACTIVITY              | 126 | 0.294 | 1.328 | 0.087 | 0.221 |
| GO_AZOLE_TRANSPORT                                                              | 15  | 0.459 | 1.327 | 0.131 | 0.222 |
| GO_ION_GATED_CHANNEL_ACTIVITY                                                   | 40  | 0.381 | 1.326 | 0.113 | 0.223 |
| GO_REGULATION_OF_NUCLEOCYTOPLASMIC_TRANSPORT                                    | 214 | 0.287 | 1.324 | 0.064 | 0.224 |

|                                                                   |     |       |       |       |       |
|-------------------------------------------------------------------|-----|-------|-------|-------|-------|
| GO_POSITIVE_REGULATION_OF_NEUROLOGICAL_SYSTEM_PROCESS             | 19  | 0.437 | 1.324 | 0.123 | 0.224 |
| GO_CARBOHYDRATE_HOMEOSTASIS                                       | 158 | 0.303 | 1.324 | 0.075 | 0.224 |
| GO_MONOVALENT_INORGANIC_CATION_TRANSMEMBRANE_TRANSPORTER_ACTIVITY | 349 | 0.288 | 1.323 | 0.076 | 0.225 |
| GO_HOMEOSTASIS_OF_NUMBER_OF_CELLS                                 | 169 | 0.294 | 1.323 | 0.101 | 0.225 |
| GO_NEGATIVE_REGULATION_OF_TRANSMEMBRANE_TRANSPORT                 | 81  | 0.314 | 1.323 | 0.065 | 0.225 |
| GO_IONOTROPIC_GLUTAMATE_RECEPTOR_BINDING                          | 23  | 0.400 | 1.323 | 0.124 | 0.225 |
| GO_RETINOIC_ACID_METABOLIC_PROCESS                                | 21  | 0.462 | 1.323 | 0.154 | 0.225 |
| GO_GASTRULATION                                                   | 147 | 0.310 | 1.322 | 0.100 | 0.226 |
| GO_HINDBRAIN_DEVELOPMENT                                          | 136 | 0.326 | 1.321 | 0.101 | 0.226 |
| GO_SEGMENT_SPECIFICATION                                          | 16  | 0.459 | 1.320 | 0.127 | 0.227 |
| GO_CELLULAR_RESPONSE_TO_INORGANIC_SUBSTANCE                       | 149 | 0.289 | 1.320 | 0.058 | 0.227 |
| GO_POSITIVE_REGULATION_OF_ANTI_GEN_PROCESSING_AND_PRESENTATION    | 16  | 0.509 | 1.320 | 0.162 | 0.227 |
| GO_CRANIAL_NERVE_MORPHOGENESIS                                    | 23  | 0.424 | 1.320 | 0.143 | 0.227 |
| GO_POSITIVE_REGULATION_OF_ALPHA_BETA_T_CELL_DIFFERENTIATION       | 37  | 0.418 | 1.319 | 0.174 | 0.228 |
| GO_ACTIVATION_OF_JUN_KINASE_ACTIVITY                              | 32  | 0.411 | 1.317 | 0.154 | 0.230 |
| GO_TRANSFERASE_ACTIVITY_TRANSFERRING_SULFUR_CONTAINING_GROUPS     | 66  | 0.340 | 1.317 | 0.111 | 0.230 |
| GO_APICAL_JUNCTION_COMPLEX                                        | 119 | 0.319 | 1.317 | 0.129 | 0.230 |
| GO_WNT_SIGNALING_PATHWAY                                          | 336 | 0.277 | 1.316 | 0.085 | 0.230 |
| GO_POSITIVE_REGULATION_OF_LEUKOCYTE_PROLIFERATION                 | 133 | 0.380 | 1.316 | 0.183 | 0.230 |
| GO_REGULATION_OF_LEUKOCYTE_PROLIFERATION                          | 199 | 0.359 | 1.314 | 0.189 | 0.232 |
| GO_BONE_MINERALIZATION                                            | 38  | 0.364 | 1.314 | 0.092 | 0.232 |
| GO_NEURAL_TUBE_PATTERNING                                         | 32  | 0.393 | 1.314 | 0.123 | 0.232 |
| GO_MULTICELLULAR_ORGANISMAL_WATER_HOMEOSTASIS                     | 57  | 0.399 | 1.313 | 0.152 | 0.233 |
| GO_POSITIVE_REGULATION_OF_INTERLEUKIN_1_BETA_PRODUCTION           | 30  | 0.446 | 1.312 | 0.165 | 0.234 |
| GO_GUANYL_NUCLEOTIDE_BINDING                                      | 357 | 0.266 | 1.311 | 0.071 | 0.235 |



|                                                                            |     |       |       |       |       |
|----------------------------------------------------------------------------|-----|-------|-------|-------|-------|
| GO_REGULATION_OF_ORGAN_GROWTH                                              | 71  | 0.323 | 1.311 | 0.082 | 0.235 |
| GO_POSITIVE_REGULATION_OF_CIRCADIAN_RHYTHM                                 | 19  | 0.466 | 1.310 | 0.124 | 0.236 |
| GO_RETINOIC_ACID_RECEPTOR_SIGNALING_PATHWAY                                | 17  | 0.440 | 1.310 | 0.130 | 0.235 |
| GO_PHOSPHATIDYLINOSITOL_4_5_BISPHOSPHATE_BINDING                           | 47  | 0.338 | 1.309 | 0.101 | 0.236 |
| GO_NEURON_NEURON_SYNAPTIC_TRANSMISSION                                     | 54  | 0.374 | 1.309 | 0.133 | 0.236 |
| GO_REGULATION_OF_ACTIN_FILAMENT_DEPOLYMERIZATION                           | 43  | 0.380 | 1.308 | 0.123 | 0.237 |
| GO_RESPONSE_TO_ETHANOL                                                     | 136 | 0.296 | 1.307 | 0.070 | 0.238 |
| GO_NEGATIVE_REGULATION_OF_WNT_SIGNALING_PATHWAY                            | 189 | 0.299 | 1.307 | 0.112 | 0.238 |
| GO_CELL_DIFFERENTIATION_IN_HIND_BRAIN                                      | 21  | 0.447 | 1.306 | 0.149 | 0.238 |
| GO_HEPARAN_SULFATE_PROTEOGLYCAN_BIOSYNTHETIC_PROCESS                       | 23  | 0.441 | 1.306 | 0.165 | 0.239 |
| GO_ATPASE_COMPLEX                                                          | 24  | 0.395 | 1.305 | 0.134 | 0.240 |
| GO_POSITIVE_REGULATION_OF_CYTOSOLIC_TRANSPORT                              | 269 | 0.265 | 1.304 | 0.046 | 0.240 |
| GO_MAP_KINASE_KINASE_KINASE_ACTIVITY                                       | 18  | 0.446 | 1.304 | 0.162 | 0.240 |
| GO_POSITIVE_REGULATION_OF_WOUND_HEALING                                    | 46  | 0.389 | 1.303 | 0.136 | 0.241 |
| GO_POSITIVE_REGULATION_OF_EXTRINSIC_APOPTOTIC_SIGNALING_PATHWAY            | 51  | 0.366 | 1.301 | 0.133 | 0.243 |
| GO_FORELIMB_MORPHOGENESIS                                                  | 39  | 0.385 | 1.301 | 0.119 | 0.243 |
| GO_NEUROPEPTIDE_RECEPTOR_BINDING                                           | 27  | 0.422 | 1.301 | 0.121 | 0.243 |
| GO_PEPTIDE_SECRETION                                                       | 56  | 0.373 | 1.300 | 0.129 | 0.243 |
| GO_PEPTIDASE_REGULATOR_ACTIVITY                                            | 202 | 0.316 | 1.298 | 0.114 | 0.245 |
| GO_HEPARAN_SULFATE_SULFOTRANSFERASE_ACTIVITY                               | 15  | 0.470 | 1.298 | 0.175 | 0.246 |
| GO_NEURAL_RETINA_DEVELOPMENT                                               | 49  | 0.351 | 1.298 | 0.115 | 0.246 |
| GO_RESPONSE_TO_PLATELET_DERIVED_GROWTH_FACTOR                              | 18  | 0.446 | 1.298 | 0.190 | 0.246 |
| GO_POSITIVE_REGULATION_OF_POTASSIUM_ION_TRANSMEMBRANE_TRANSPORTER_ACTIVITY | 16  | 0.451 | 1.298 | 0.174 | 0.246 |
| GO_SIGNALING_PATTERN_RECOGNITION                                           | 17  | 0.516 | 1.298 | 0.229 | 0.245 |

---

|                                                                                      |     |       |       |       |       |
|--------------------------------------------------------------------------------------|-----|-------|-------|-------|-------|
| ON_RECEPTOR_ACTIVITY                                                                 |     |       |       |       |       |
| GO_NEUROTROPHIN_TRK_RECEPTOR_SIGNALING_PATHWAY                                       | 15  | 0.445 | 1.297 | 0.169 | 0.246 |
| GO_RESPONSE_TO_EXOGENOUS_DSRNA                                                       | 32  | 0.390 | 1.297 | 0.155 | 0.246 |
| GO_METALLOEXOPEPTIDASE_ACTIVITY                                                      | 48  | 0.340 | 1.297 | 0.094 | 0.246 |
| GO_CYTOKINE_PRODUCTION                                                               | 116 | 0.352 | 1.297 | 0.163 | 0.246 |
| GO_CUL3_RING_UBIQUITIN_LIGASE_COMPLEX                                                | 60  | 0.340 | 1.296 | 0.107 | 0.246 |
| GO_GAS_TRANSPORT                                                                     | 17  | 0.471 | 1.296 | 0.166 | 0.246 |
| GO_HINDBRAIN_MORPHOGENESIS                                                           | 39  | 0.365 | 1.296 | 0.143 | 0.246 |
| GO_PANCREAS_DEVELOPMENT                                                              | 72  | 0.341 | 1.296 | 0.135 | 0.246 |
| GO_SERTOLI_CELL_DIFFERENTIATION                                                      | 18  | 0.450 | 1.295 | 0.148 | 0.247 |
| GO_LIPID_STORAGE                                                                     | 26  | 0.408 | 1.295 | 0.168 | 0.247 |
| GO_POSITIVE_REGULATION_OF_HOMEOSTATIC_PROCESS                                        | 204 | 0.266 | 1.295 | 0.049 | 0.247 |
| GO_LYTIC_VACUOLE                                                                     | 496 | 0.293 | 1.294 | 0.135 | 0.248 |
| GO_POSITIVE_REGULATION_OF_PROTEIN_TARGETING_TO_MEMBRANE                              | 15  | 0.454 | 1.293 | 0.158 | 0.249 |
| GO_RESPONSE_TO_THYROID_HORMONE                                                       | 21  | 0.402 | 1.293 | 0.152 | 0.248 |
| GO_SEX_DIFFERENTIATION                                                               | 253 | 0.272 | 1.293 | 0.061 | 0.248 |
| GO_TRANSCRIPTIONAL_REPRESSOR_ACTIVITY_RNA_POLYMERASE_II_TRANSCRIPTION_FACTOR_BINDING | 82  | 0.326 | 1.293 | 0.113 | 0.248 |
| GO_MYOTUBE_CELL_DEVELOPMENT                                                          | 24  | 0.409 | 1.293 | 0.133 | 0.249 |
| GO_REGULATION_OF_VIRAL_ENTRY_INTO_HOST_CELL                                          | 25  | 0.421 | 1.293 | 0.178 | 0.249 |
| GO_CELLULAR_RESPONSE_TO_CAMP                                                         | 49  | 0.354 | 1.292 | 0.120 | 0.249 |
| GO_CELL_CELL_JUNCTION_ASSEMBLY                                                       | 72  | 0.331 | 1.291 | 0.120 | 0.250 |
| GO_CELLULAR_RESPONSE_TO_INTERLEUKIN_6                                                | 22  | 0.417 | 1.291 | 0.169 | 0.250 |
| GO_OSTEOBLAST_DIFFERENTIATION                                                        | 123 | 0.309 | 1.290 | 0.134 | 0.250 |
| GO_COMPLEMENT_BINDING                                                                | 19  | 0.455 | 1.289 | 0.152 | 0.252 |
| GO_POSITIVE_REGULATION_OF_ALPHA_BETA_T_CELL_ACTIVATION                               | 51  | 0.409 | 1.289 | 0.206 | 0.252 |
| GO_RECEPTOR_REGULATOR_ACTIVITY                                                       | 45  | 0.343 | 1.289 | 0.125 | 0.252 |
| GO_RESPONSE_TO_IMMOBILIZATION_STRESS                                                 | 22  | 0.416 | 1.288 | 0.141 | 0.252 |
| GO_RESPONSE_TO_CAFFEINE                                                              | 17  | 0.427 | 1.288 | 0.167 | 0.253 |
| GO_TRANSCRIPTIONAL_REPRESSOR_A                                                       | 164 | 0.283 | 1.287 | 0.106 | 0.253 |

---

|                                                                                     |     |       |       |       |       |
|-------------------------------------------------------------------------------------|-----|-------|-------|-------|-------|
| CTIVITY_RNA_POLYMERASE_II_TRANSCRIPTION_REGULATORY_REGION_SEQUENCE_SPECIFIC_BINDING |     |       |       |       |       |
| GO_REGULATION_OF_KERATINOCYTE_PROLIFERATION                                         | 26  | 0.427 | 1.286 | 0.150 | 0.254 |
| GO_REGULATION_OF_NATURAL_KILLER_CELL_ACTIVATION                                     | 26  | 0.395 | 1.286 | 0.160 | 0.254 |
| GO_RESPONSE_TO_CORTICOSTERONE                                                       | 26  | 0.402 | 1.285 | 0.156 | 0.254 |
| GO_NEGATIVE_REGULATION_OF_NEURON_DEATH                                              | 163 | 0.291 | 1.285 | 0.105 | 0.254 |
| GO_NEUROTRANSMITTER_TRANSPORT                                                       | 148 | 0.319 | 1.285 | 0.145 | 0.254 |
| GO_PEPTIDASE_INHIBITOR_ACTIVITY                                                     | 167 | 0.330 | 1.285 | 0.129 | 0.255 |
| GO_REGULATION_OF_B_CELL_PROLIFERATION                                               | 55  | 0.392 | 1.284 | 0.199 | 0.255 |
| GO_PHOSPHATIDYLINOSITOL_METABOLIC_PROCESS                                           | 189 | 0.273 | 1.284 | 0.082 | 0.255 |
| GO_REGULATION_OF_MESONEPHROS_DEVELOPMENT                                            | 26  | 0.409 | 1.284 | 0.137 | 0.255 |
| GO_ACROSOME_REACTION                                                                | 16  | 0.456 | 1.284 | 0.175 | 0.255 |
| GO_CALCIIUM_ION_REGULATED_EXOCYTOSIS_OF_NEUROTRANSMITTER                            | 33  | 0.396 | 1.284 | 0.180 | 0.255 |
| GO_CLATHRIN_COATED_ENDOCYTIC_VESICLE_MEMBRANE                                       | 46  | 0.394 | 1.284 | 0.219 | 0.255 |
| GO_ESTABLISHMENT_OR_MAINTENANCE_OF_EPITHELIAL_CELL_APICAL_BASAL_POLARITY            | 27  | 0.361 | 1.284 | 0.143 | 0.255 |
| GO_RESPONSE_TO_ELECTRICAL_STIMULUS                                                  | 42  | 0.357 | 1.283 | 0.147 | 0.256 |
| GO_POSITIVE_REGULATION_OF_FATTY_ACID_METABOLIC_PROCESS                              | 33  | 0.389 | 1.282 | 0.168 | 0.256 |
| GO_COLUMNAR_CUBOIDAL_EPITHELIAL_CELL_DIFFERENTIATION                                | 106 | 0.302 | 1.282 | 0.093 | 0.256 |
| GO_POSITIVE_REGULATION_OF_AUTOPHAGY                                                 | 74  | 0.322 | 1.282 | 0.132 | 0.257 |
| GO_AMPA_Glutamate_Receptor_Complex                                                  | 27  | 0.422 | 1.281 | 0.163 | 0.257 |
| GO_REGULATION_OF_DENDRITIC_Spine_Morphogenesis                                      | 30  | 0.379 | 1.280 | 0.144 | 0.258 |
| GO_B_CELL_HOMEOSTASIS                                                               | 21  | 0.462 | 1.279 | 0.212 | 0.259 |
| GO_POSITIVE_REGULATION_OF_NEURAL_Precursor_Cell_Proliferation                       | 39  | 0.366 | 1.278 | 0.143 | 0.259 |
| GO_RESPONSE_TO_INTERLEUKIN_1                                                        | 110 | 0.326 | 1.278 | 0.154 | 0.259 |

|                                                                                                        |     |       |       |       |       |
|--------------------------------------------------------------------------------------------------------|-----|-------|-------|-------|-------|
| GO_ANTERIOR_POSTERIOR_PATTERN_SPECIFICATION                                                            | 189 | 0.298 | 1.278 | 0.122 | 0.260 |
| GO_REGULATION_OF_SYNAPTIC_VESICLE_EXOCYTOSIS                                                           | 19  | 0.437 | 1.278 | 0.194 | 0.260 |
| GO_OXIDOREDUCTASE_ACTIVITY_ACTING_ON_PAIRED_DONORS_WITH_INCORPORATION_OR_REDUCTION_OF_MOLECULAR_OXYGEN | 142 | 0.289 | 1.277 | 0.125 | 0.260 |
| GO_STEM_CELL_DIVISION                                                                                  | 29  | 0.397 | 1.277 | 0.203 | 0.261 |
| GO_REGULATION_OF_TRANSFORMING_GROWTH_FACTOR_BETA_PRODUCTION                                            | 25  | 0.390 | 1.276 | 0.161 | 0.262 |
| GO_NEGATIVE_REGULATION_OF_RESPONSE_TO_REACTIVE_OXYGEN_SPECIES                                          | 17  | 0.442 | 1.276 | 0.174 | 0.262 |
| GO_AUTOPHAGOSOME_MEMBRANE                                                                              | 27  | 0.370 | 1.275 | 0.179 | 0.262 |
| GO_POSITIVE_REGULATION_OF_INTERLEUKIN_6_PRODUCTION                                                     | 66  | 0.356 | 1.274 | 0.164 | 0.263 |
| GO_POSITIVE_REGULATION_OF_LIPID_STORAGE                                                                | 18  | 0.443 | 1.274 | 0.180 | 0.263 |
| GO_CLATHRIN_COATED_ENDOCYTIC_VESICLE                                                                   | 63  | 0.352 | 1.274 | 0.205 | 0.263 |
| GO_DETECTION_OF_LIGHT_STIMULUS_INVOLVED_IN_SENSORY_PERCEPTION                                          | 17  | 0.478 | 1.274 | 0.205 | 0.263 |
| GO_REGULATION_OF_PROTEIN_BINDING                                                                       | 167 | 0.277 | 1.273 | 0.091 | 0.263 |
| GO_REGULATION_OF_I_KAPPA_B_KINASE_NF_KAPPA_B_SIGNALING                                                 | 228 | 0.293 | 1.273 | 0.154 | 0.263 |
| GO_SODIUM_ION_TRANSMEMBRANE_TRANSPORTER_ACTIVITY                                                       | 130 | 0.312 | 1.273 | 0.138 | 0.263 |
| GO_DEFENSE_RESPONSE_TO_GRAM_NEGATIVE_BACTERIUM                                                         | 42  | 0.394 | 1.273 | 0.169 | 0.263 |
| GO_T_CELL_PROLIFERATION                                                                                | 34  | 0.412 | 1.272 | 0.210 | 0.264 |
| GO_RESPONSE_TO_DRUG                                                                                    | 426 | 0.252 | 1.272 | 0.067 | 0.265 |
| GO_PROTEIN_COMPLEX_SCAFFOLD                                                                            | 64  | 0.309 | 1.271 | 0.120 | 0.265 |
| GO_LYMPHOCYTE_ACTIVATION                                                                               | 322 | 0.345 | 1.271 | 0.213 | 0.265 |
| GO_SULFUR_COMPOUND_BIOSYNTHETIC_PROCESS                                                                | 193 | 0.282 | 1.271 | 0.124 | 0.265 |
| GO_REGULATION_OF_ANTIGEN_PROCESSING_AND_PRESENTATION                                                   | 23  | 0.472 | 1.271 | 0.215 | 0.265 |
| GO_POSITIVE_REGULATION_OF_HEART_GROWTH                                                                 | 26  | 0.385 | 1.270 | 0.162 | 0.265 |
| GO_HIPPO_SIGNALLING                                                                                    | 27  | 0.422 | 1.270 | 0.208 | 0.266 |

|                                                            |     |       |       |       |       |
|------------------------------------------------------------|-----|-------|-------|-------|-------|
| GO_GLYCAN_BIOSYNTHETIC_PROCESS                             | 25  | 0.406 | 1.270 | 0.198 | 0.266 |
| GO_NEGATIVE_REGULATION_OF_NOTCH_SIGNALING_PATHWAY          | 26  | 0.393 | 1.270 | 0.172 | 0.266 |
| GO_POSITIVE_REGULATION_OF_STEM_CELL_PROLIFERATION          | 60  | 0.337 | 1.269 | 0.150 | 0.266 |
| GO_PHOSPHOLIPID_TRANSPORTER_ACTIVITY                       | 45  | 0.342 | 1.269 | 0.149 | 0.266 |
| GO_NOTCH_SIGNALING_PATHWAY                                 | 111 | 0.291 | 1.268 | 0.108 | 0.267 |
| GO_FEMALE_SEX_DIFFERENTIATION                              | 113 | 0.290 | 1.268 | 0.091 | 0.267 |
| GO_LEUKOCYTE_HOMEOSTASIS                                   | 60  | 0.359 | 1.267 | 0.174 | 0.267 |
| GO_POSITIVE_REGULATION_OF_CYTOKINE_PRODUCTION              | 358 | 0.309 | 1.267 | 0.204 | 0.268 |
| GO_POSITIVE_REGULATION_OF_NUCLEOCYTOPLASMIC_TRANSPORT      | 118 | 0.292 | 1.267 | 0.125 | 0.268 |
| GO_CELLULAR_RESPONSE_TO_INTERLEUKIN_1                      | 84  | 0.338 | 1.266 | 0.181 | 0.269 |
| GO_PALLIUM_DEVELOPMENT                                     | 150 | 0.290 | 1.264 | 0.132 | 0.270 |
| GO_POSITIVE_REGULATION_OF_B_CELL_ACTIVATION                | 65  | 0.382 | 1.262 | 0.223 | 0.272 |
| GO_CCR_CHEMOKINE_RECEPTOR_BINDING                          | 34  | 0.448 | 1.262 | 0.207 | 0.273 |
| GO_REGULATION_OF_CD4_POSITIVE_ALPHA_BETA_T_CELL_ACTIVATION | 37  | 0.409 | 1.261 | 0.232 | 0.273 |
| GO_INNER_EAR_RECEPTOR_CELL_DEVELOPMENT                     | 33  | 0.348 | 1.261 | 0.162 | 0.273 |
| GO_REGULATION_OF_MEMBRANE_LIPID_DISTRIBUTION               | 37  | 0.345 | 1.261 | 0.162 | 0.274 |
| GO_PIGMENTATION                                            | 80  | 0.294 | 1.260 | 0.125 | 0.274 |
| GO_ODONTOGENESIS_OF_DENTIN_CONTAINING_TOOTH                | 74  | 0.328 | 1.260 | 0.145 | 0.274 |
| GO_POSITIVE_REGULATION_OF_EMBRYONIC_DEVELOPMENT            | 30  | 0.399 | 1.260 | 0.185 | 0.274 |
| GO_RESPONSE_TO_EXTRACELLULAR_STIMULUS                      | 428 | 0.250 | 1.260 | 0.057 | 0.274 |
| GO_REGULATION_OF_INTRACELLULAR_PROTEIN_TRANSPORT           | 354 | 0.247 | 1.260 | 0.078 | 0.274 |
| GO_PHOSPHATIDYLINOSITOL_KINASE_ACTIVITY                    | 49  | 0.353 | 1.260 | 0.169 | 0.274 |
| GO_STEROL_BINDING                                          | 42  | 0.370 | 1.260 | 0.166 | 0.274 |
| GO_LAMELLIPODIUM_ASSEMBLY                                  | 28  | 0.369 | 1.258 | 0.150 | 0.275 |
| GO_AMMONIUM_ION_BINDING                                    | 69  | 0.332 | 1.258 | 0.145 | 0.275 |
| GO_REGULATION_OF_B_CELL_ACTIVATION                         | 100 | 0.367 | 1.257 | 0.234 | 0.276 |

|                                                                              |     |       |       |       |       |
|------------------------------------------------------------------------------|-----|-------|-------|-------|-------|
| GO_NEUROFILIN_BINDING                                                        | 15  | 0.449 | 1.255 | 0.195 | 0.278 |
| GO_ACTIVATION_OF_GTPASE_ACTIVITY                                             | 73  | 0.325 | 1.255 | 0.184 | 0.278 |
| GO_REGULATION_OF_DIGESTIVE_SYSTEM_PROCESS                                    | 35  | 0.378 | 1.255 | 0.152 | 0.278 |
| GO_MACROPHAGE_DIFFERENTIATION                                                | 19  | 0.414 | 1.255 | 0.194 | 0.278 |
| GO_LOCALIZATION_WITHIN_MEMBRANE                                              | 120 | 0.290 | 1.255 | 0.140 | 0.278 |
| GO_CELLULAR_COMPONENT_ASSEMBLY_INVOLVED_IN_MORPHOGENESIS                     | 219 | 0.297 | 1.255 | 0.197 | 0.278 |
| GO_PRESYNAPTIC_PROCESS_INVOLVED_IN_SYNAPTIC_TRANSMISSION                     | 109 | 0.321 | 1.254 | 0.174 | 0.278 |
| GO_REGULATION_OF_SEQUENCE_SPECIFIC_DNA_BINDING_TRANSCRIPTION_FACTOR_ACTIVITY | 351 | 0.255 | 1.254 | 0.085 | 0.279 |
| GO_REGULATION_OF_MAST_CELL_ACTIVATION_INVOLVED_IN_IMMUNE_RESPONSE            | 31  | 0.398 | 1.254 | 0.214 | 0.279 |
| GO_POSITIVE_REGULATION_OF_PROTEIN_BINDING                                    | 73  | 0.303 | 1.253 | 0.121 | 0.279 |
| GO_CELLULAR_RESPONSE_TO_ALCOHOL                                              | 111 | 0.291 | 1.252 | 0.109 | 0.280 |
| GO_POSITIVE_REGULATION_OF_ORGANIC_ACID_TRANSPORT                             | 29  | 0.355 | 1.252 | 0.166 | 0.280 |
| GO_POSITIVE_REGULATION_OF_DNA_BINDING                                        | 41  | 0.332 | 1.252 | 0.163 | 0.281 |
| GO_POSITIVE_REGULATION_OF_SMOOTH_MUSCLE_CELL_PROLIFERATION                   | 60  | 0.349 | 1.251 | 0.177 | 0.281 |
| GO_NEGATIVE_REGULATION_OF_GTPASE_ACTIVITY                                    | 42  | 0.315 | 1.251 | 0.129 | 0.282 |
| GO_RESPONSE_TO_INTERLEUKIN_6                                                 | 26  | 0.395 | 1.250 | 0.176 | 0.282 |
| GO_MORPHOGENESIS_OF_EMBRYONIC_EPITHELIUM                                     | 133 | 0.290 | 1.250 | 0.138 | 0.282 |
| GO_NEGATIVE_REGULATION_OF_INTERFERON_GAMMA_PRODUCTION                        | 33  | 0.402 | 1.250 | 0.201 | 0.282 |
| GO_RESPONSE_TO_LIPOPROTEIN_PARTICLE                                          | 20  | 0.413 | 1.249 | 0.184 | 0.282 |
| GO_REGULATION_OF_NITRIC_OXIDE_SYNTHASE_BIOSYNTHETIC_PROCESS                  | 18  | 0.418 | 1.249 | 0.190 | 0.282 |
| GO_MONOVALENT_INORGANIC_CATION_TRANSPORT                                     | 414 | 0.262 | 1.248 | 0.116 | 0.283 |
| GO_EXOCYTIC_VESICLE_MEMBRANE                                                 | 55  | 0.377 | 1.248 | 0.195 | 0.284 |
| GO_MAINTENANCE_OF_LOCATION                                                   | 135 | 0.285 | 1.247 | 0.120 | 0.284 |
| GO_GLUTATHIONE_PEROXIDASE_ACTIVITY                                           | 17  | 0.462 | 1.247 | 0.240 | 0.284 |

---

|                                                                                                                                              |     |       |       |       |       |
|----------------------------------------------------------------------------------------------------------------------------------------------|-----|-------|-------|-------|-------|
| VITY                                                                                                                                         |     |       |       |       |       |
| GO_POSITIVE_REGULATION_OF_OSTE<br>CLAST_DIFFERENTIATION                                                                                      | 23  | 0.411 | 1.247 | 0.220 | 0.284 |
| GO_RAS_PROTEIN_SIGNAL_TRANSDU<br>CTION                                                                                                       | 140 | 0.282 | 1.246 | 0.179 | 0.285 |
| GO_INTERLEUKIN_1_PRODUCTION                                                                                                                  | 15  | 0.504 | 1.246 | 0.245 | 0.285 |
| GO_PHOSPHOLIPID_TRANSLOCATING_<br>ATPASE_ACTIVITY                                                                                            | 16  | 0.455 | 1.246 | 0.207 | 0.285 |
| GO_REGULATION_OF_STEROID_HORM<br>ONE_SECRETION                                                                                               | 20  | 0.444 | 1.246 | 0.198 | 0.285 |
| GO_UNSATURATED_FATTY_ACID_MET<br>ABOLIC_PROCESS                                                                                              | 104 | 0.307 | 1.245 | 0.151 | 0.286 |
| GO_MOTOR_NEURON_AXON_GUIDAN<br>CE                                                                                                            | 27  | 0.414 | 1.245 | 0.183 | 0.286 |
| GO_CELLULAR_RESPONSE_TO_GROW<br>TH_HORMONE_STIMULUS                                                                                          | 20  | 0.443 | 1.245 | 0.204 | 0.286 |
| GO_LIPOPROTEIN_PARTICLE_RECEPTO<br>R_ACTIVITY                                                                                                | 16  | 0.441 | 1.244 | 0.221 | 0.286 |
| GO_ADAPTIVE_IMMUNE_RESPONSE_B<br>ASED_ON_SOMATIC_RECOMBINATION<br>_OF_IMMUNE_RECEPTORS_BUILT_FRO<br>M_IMMUNOGLOBULIN_SUPERFAMILY_<br>DOMAINS | 123 | 0.354 | 1.244 | 0.254 | 0.286 |
| GO_REGULATION_OF_CALCIIUM_ION_<br>DEPENDENT_EXOCYTOSIS                                                                                       | 82  | 0.318 | 1.244 | 0.164 | 0.286 |
| GO_REGULATION_OF_INTERLEUKIN_1<br>3_PRODUCTION                                                                                               | 16  | 0.429 | 1.243 | 0.192 | 0.287 |
| GO_REGULATION_OF_FEEDING_BEHA<br>VIOR                                                                                                        | 20  | 0.421 | 1.242 | 0.192 | 0.288 |
| GO_14_3_3_PROTEIN_BINDING                                                                                                                    | 19  | 0.411 | 1.242 | 0.213 | 0.288 |
| GO_REGULATION_OF_GLUCOSE_META<br>BOLIC_PROCESS                                                                                               | 95  | 0.281 | 1.242 | 0.146 | 0.287 |
| GO_TOLL_LIKE_RECEPTOR_4_SIGNALI<br>NG_PATHWAY                                                                                                | 18  | 0.465 | 1.242 | 0.258 | 0.288 |
| GO_PYRIMIDINE_NUCLEOSIDE_CATAB<br>OLIC_PROCESS                                                                                               | 20  | 0.432 | 1.242 | 0.220 | 0.288 |
| GO_INACTIVATION_OF_MAPK_ACTIVI<br>TY                                                                                                         | 26  | 0.370 | 1.242 | 0.197 | 0.288 |
| GO_DEFENSE_RESPONSE_TO_FUNGUS                                                                                                                | 37  | 0.433 | 1.241 | 0.196 | 0.288 |
| GO_LYMPHOCYTE_CHEMOTAXIS                                                                                                                     | 37  | 0.450 | 1.241 | 0.229 | 0.288 |
| GO_REGULATION_OF_INTERLEUKIN_2<br>_PRODUCTION                                                                                                | 47  | 0.397 | 1.241 | 0.273 | 0.288 |
| GO_CHLORIDE_CHANNEL_COMPLEX                                                                                                                  | 49  | 0.339 | 1.241 | 0.168 | 0.288 |
| GO_REGULATION_OF_ALPHA_BETA_T_                                                                                                               | 67  | 0.380 | 1.240 | 0.241 | 0.288 |

---

|                                                                    |     |       |       |       |       |
|--------------------------------------------------------------------|-----|-------|-------|-------|-------|
| CELL_ACTIVATION                                                    |     |       |       |       |       |
| GO_BONE_RESORPTION                                                 | 21  | 0.413 | 1.240 | 0.215 | 0.289 |
| GO_MATING                                                          | 36  | 0.352 | 1.239 | 0.146 | 0.290 |
| GO_RUFFLE_ORGANIZATION                                             | 20  | 0.396 | 1.239 | 0.198 | 0.290 |
| GO_ADAPTIVE_IMMUNE_RESPONSE                                        | 237 | 0.372 | 1.239 | 0.281 | 0.290 |
| GO_PHOSPHATIDYLINOSITOL_PHOSPHATE_BINDING                          | 111 | 0.289 | 1.238 | 0.134 | 0.290 |
| GO_NONMOTILE_PRIMARY_CILIUM                                        | 127 | 0.308 | 1.238 | 0.189 | 0.290 |
| GO_MUSCLE_CELL_PROLIFERATION                                       | 17  | 0.443 | 1.238 | 0.235 | 0.290 |
| GO_CELLULAR_RESPONSE_TO_CORTICOSTEROID_STIMULUS                    | 56  | 0.327 | 1.238 | 0.152 | 0.290 |
| GO_CATECHOLAMINE_BIOSYNTHETIC_PROCESS                              | 18  | 0.443 | 1.237 | 0.197 | 0.290 |
| GO_WATER_HOMEOSTASIS                                               | 68  | 0.355 | 1.237 | 0.190 | 0.291 |
| GO_NEGATIVE_REGULATION_OF_LIPID_TRANSPORT                          | 26  | 0.437 | 1.237 | 0.210 | 0.291 |
| GO_REGULATION_OF_DELAYED_RECTIFIER_POTASSIUM_CHANNEL_ACTIVITY      | 17  | 0.429 | 1.236 | 0.228 | 0.291 |
| GO_VENTRICULAR_CARDIAC_MUSCLE_TISSUE_DEVELOPMENT                   | 43  | 0.335 | 1.236 | 0.175 | 0.292 |
| GO_BLOOD_MICROPARTICLE                                             | 114 | 0.401 | 1.235 | 0.182 | 0.293 |
| GO_NEGATIVE_REGULATION_OF_PROTEIN_KINASE_B_SIGNALING               | 33  | 0.342 | 1.235 | 0.180 | 0.293 |
| GO_REGULATION_OF_INTERFERON_GAMMA_PRODUCTION                       | 93  | 0.367 | 1.232 | 0.250 | 0.296 |
| GO_PHOSPHATIDYLINOSITOL_3_5_BISPHOSPHATE_BINDING                   | 19  | 0.411 | 1.231 | 0.206 | 0.297 |
| GO_REGULATION_OF_CARBOHYDRATE_CATABOLIC_PROCESS                    | 39  | 0.314 | 1.231 | 0.156 | 0.297 |
| GO_PROTEIN_SECRETION                                               | 110 | 0.297 | 1.230 | 0.166 | 0.297 |
| GO_REGULATION_OF_INTERLEUKIN_8_PRODUCTION                          | 58  | 0.358 | 1.230 | 0.191 | 0.297 |
| GO_MUSCLE_CELL_CELLULAR_HOMEOSTASIS                                | 17  | 0.412 | 1.230 | 0.203 | 0.297 |
| GO_SOMITOGENESIS                                                   | 60  | 0.310 | 1.230 | 0.145 | 0.297 |
| GO_NEGATIVE_REGULATION_OF_SIGNAL_TRANSDUCTION_IN_ABSENCE_OF_LIGAND | 32  | 0.372 | 1.230 | 0.184 | 0.297 |
| GO_REGULATION_OF_POLYSACCHARIDE_METABOLIC_PROCESS                  | 41  | 0.336 | 1.229 | 0.183 | 0.298 |
| GO_WW_DOMAIN_BINDING                                               | 30  | 0.365 | 1.228 | 0.219 | 0.299 |
| GO_NEGATIVE_REGULATION_OF_CANONICAL_WNT_SIGNALING_PATHWAY          | 157 | 0.291 | 1.228 | 0.175 | 0.299 |



|                                                                 |     |       |       |       |       |
|-----------------------------------------------------------------|-----|-------|-------|-------|-------|
| GO_PSEUDOPODIUM                                                 | 16  | 0.442 | 1.228 | 0.233 | 0.299 |
| GO_TRACHEA_DEVELOPMENT                                          | 20  | 0.405 | 1.228 | 0.186 | 0.299 |
| GO_CHLORIDE_TRANSPORT                                           | 98  | 0.297 | 1.228 | 0.187 | 0.299 |
| GO_COATED_PIT                                                   | 65  | 0.304 | 1.227 | 0.170 | 0.299 |
| GO_RESPONSE_TO_STARVATION                                       | 147 | 0.278 | 1.227 | 0.153 | 0.299 |
| GO_POSITIVE_REGULATION_OF_POTASSIUM_ION_TRANSMEMBRANE_TRANSPORT | 26  | 0.390 | 1.227 | 0.212 | 0.300 |
| GO_POSITIVE_REGULATION_OF_INTRACELLULAR_TRANSPORT               | 345 | 0.244 | 1.226 | 0.096 | 0.300 |
| GO_NITRIC_OXIDE_SYNTHASE_BINDING                                | 19  | 0.411 | 1.226 | 0.219 | 0.300 |
| GO_REGULATION_OF_NEURON_DEATH                                   | 242 | 0.258 | 1.226 | 0.128 | 0.300 |
| GO_VENTRICULAR_CARDIAC_MUSCLE_CELL_DIFFERENTIATION              | 17  | 0.398 | 1.226 | 0.167 | 0.300 |
| GO_MORPHOGENESIS_OF_AN_EPITHELIAL_SHEET                         | 40  | 0.345 | 1.226 | 0.204 | 0.300 |
| GO_REGULATION_OF_ADAPTIVE_IMMUNE_RESPONSE                       | 118 | 0.349 | 1.225 | 0.250 | 0.301 |
| GO_PROTEIN_KINASE_C_BINDING                                     | 47  | 0.334 | 1.225 | 0.192 | 0.301 |
| GO_DENDRITIC_CELL_MIGRATION                                     | 21  | 0.463 | 1.225 | 0.271 | 0.301 |
| GO_AMMONIUM_TRANSMEMBRANE_TRANSPORT                             | 24  | 0.388 | 1.225 | 0.203 | 0.301 |
| GO_REGULATION_OF_INTERLEUKIN_6_BIOSYNTHETIC_PROCESS             | 16  | 0.437 | 1.225 | 0.208 | 0.301 |
| GO_POSITIVE_REGULATION_OF_GLYCOPROTEIN_METABOLIC_PROCESS        | 17  | 0.415 | 1.225 | 0.221 | 0.301 |
| GO_POSITIVE_REGULATION_OF_INTERLEUKIN_8_PRODUCTION              | 44  | 0.368 | 1.224 | 0.214 | 0.301 |
| GO_CELLULAR_RESPONSE_TO_ZINC_ION                                | 16  | 0.481 | 1.223 | 0.261 | 0.302 |
| GO_REPRODUCTIVE_SYSTEM_DEVELOPMENT                              | 396 | 0.245 | 1.223 | 0.094 | 0.303 |
| GO_REGULATION_OF_IMMUNOGLOBULIN_SECRETION                       | 16  | 0.439 | 1.223 | 0.243 | 0.302 |
| GO_PLATELET_MORPHOGENESIS                                       | 18  | 0.411 | 1.222 | 0.203 | 0.303 |
| GO_REGULATION_OF_ANTIGEN_RECEPTOR_MEDIATED_SIGNALING_PATHWAY    | 38  | 0.406 | 1.221 | 0.268 | 0.304 |
| GO_GLAND_DEVELOPMENT                                            | 389 | 0.248 | 1.220 | 0.088 | 0.305 |
| GO_GLUCAN_METABOLIC_PROCESS                                     | 57  | 0.332 | 1.220 | 0.220 | 0.305 |
| GO_FERROUS_IRON_BINDING                                         | 22  | 0.393 | 1.220 | 0.227 | 0.305 |
| GO_PROLINE_RICH_REGION_BINDING                                  | 18  | 0.401 | 1.220 | 0.230 | 0.305 |
| GO_REGULATION_OF_IMMUNE_EFFECT                                  | 406 | 0.284 | 1.219 | 0.222 | 0.306 |

| TOR_PROCESS                                                                 |     |       |       |       |       |
|-----------------------------------------------------------------------------|-----|-------|-------|-------|-------|
| GO_ASTROCYTE_DIFFERENTIATION                                                | 38  | 0.350 | 1.219 | 0.185 | 0.305 |
| GO_B_CELL_ACTIVATION                                                        | 116 | 0.348 | 1.219 | 0.228 | 0.306 |
| GO_POSITIVE_REGULATION_OF_T_HELPER_CELL_DIFFERENTIATION                     | 18  | 0.431 | 1.219 | 0.242 | 0.306 |
| GO_RESPONSE_TO_HYDROGEN_PEROXIDE                                            | 107 | 0.299 | 1.219 | 0.189 | 0.306 |
| GO_NEUROPEPTIDE_BINDING                                                     | 21  | 0.431 | 1.218 | 0.210 | 0.306 |
| GO_REGULATION_OF_DENDRITE_DEVELOPMENT                                       | 116 | 0.288 | 1.216 | 0.167 | 0.308 |
| GO_PIGMENT_GRANULE_ORGANIZATION                                             | 20  | 0.383 | 1.216 | 0.202 | 0.309 |
| GO_POSITIVE_REGULATION_OF_MESONEPHROS_DEVELOPMENT                           | 22  | 0.410 | 1.215 | 0.211 | 0.309 |
| GO_VESICLE_MEMBRANE_FUSION                                                  | 490 | 0.253 | 1.214 | 0.151 | 0.310 |
| GO_CYTOPLASMIC_SEQUESTERING_OF_PROTEIN                                      | 40  | 0.347 | 1.213 | 0.221 | 0.311 |
| GO_POSITIVE_REGULATION_OF_HORMONE_SECRETION                                 | 113 | 0.281 | 1.213 | 0.143 | 0.311 |
| GO_AUTOPHAGOSOME_DEVELOPMENT                                                | 76  | 0.309 | 1.212 | 0.196 | 0.313 |
| GO_MALE_GENITALIA_DEVELOPMENT                                               | 21  | 0.392 | 1.212 | 0.215 | 0.312 |
| GO_NEGATIVE_REGULATION_OF_STRESS_ACTIVATED_PROTEIN_KINASE_SIGNALING_CASCADE | 40  | 0.325 | 1.212 | 0.197 | 0.312 |
| GO_POSITIVE_REGULATION_OF_NOTCH_SIGNALING_PATHWAY                           | 33  | 0.350 | 1.211 | 0.204 | 0.313 |
| GO_MACROMITOPHAGY                                                           | 128 | 0.252 | 1.211 | 0.129 | 0.312 |
| GO_POSITIVE_REGULATION_OF_NF_KAPPA_B_IMPORT_INTO_NUCLEUS                    | 27  | 0.397 | 1.211 | 0.226 | 0.312 |
| GO_MALE_SEX_DIFFERENTIATION                                                 | 143 | 0.261 | 1.211 | 0.146 | 0.313 |
| GO_SPINAL_CORD_PATTERNING                                                   | 24  | 0.432 | 1.211 | 0.230 | 0.313 |
| GO_NEGATIVE_REGULATION_OF_PROTEINASE_ACTIVITY                               | 233 | 0.284 | 1.210 | 0.170 | 0.314 |
| GO_T_CELL_ACTIVATION_INVOLVED_IN_IMMUNE_RESPONSE                            | 47  | 0.376 | 1.210 | 0.257 | 0.313 |
| GO_PROSTANOID_BIOSYNTHETIC_PROCESS                                          | 18  | 0.402 | 1.209 | 0.218 | 0.314 |
| GO_NEGATIVE_REGULATION_OF_ANOIKIS                                           | 17  | 0.414 | 1.208 | 0.224 | 0.316 |
| GO_POSITIVE_REGULATION_OF_CELL_GROWTH                                       | 141 | 0.264 | 1.208 | 0.162 | 0.316 |
| GO_CELLULAR_RESPONSE_TO_STARVATION                                          | 110 | 0.282 | 1.207 | 0.188 | 0.316 |
| GO_PROSTATE_GLAND_DEVELOPMENT                                               | 41  | 0.352 | 1.207 | 0.218 | 0.317 |

---

| T                                                                     |     |       |       |       |       |
|-----------------------------------------------------------------------|-----|-------|-------|-------|-------|
| GO_CELL_PROJECTION_ASSEMBLY                                           | 241 | 0.263 | 1.206 | 0.195 | 0.317 |
| GO_CELLULAR_RESPONSE_TO_MECHANICAL_STIMULUS                           | 79  | 0.307 | 1.206 | 0.201 | 0.317 |
| GO_LEUKOCYTE_DEGRANULATION                                            | 30  | 0.391 | 1.206 | 0.243 | 0.317 |
| GO_TUBE_FORMATION                                                     | 129 | 0.282 | 1.206 | 0.184 | 0.317 |
| GO_INTRINSIC_COMPONENT_OF_THE_CYTOPLASMIC_SIDE_OF_THE_PLASMA_MEMBRANE | 15  | 0.438 | 1.205 | 0.245 | 0.317 |
| GO_POSITIVE_REGULATION_OF_CYTOKINE_BIOSYNTHETIC_PROCESS               | 57  | 0.393 | 1.205 | 0.265 | 0.317 |
| GO_PHOTORECEPTOR_CELL_DIFFERENTIATION                                 | 48  | 0.333 | 1.205 | 0.209 | 0.318 |
| GO_RHYTHMIC_PROCESS                                                   | 286 | 0.249 | 1.205 | 0.140 | 0.318 |
| GO_NEGATIVE_REGULATION_OF_NEURON_APOPTOTIC_PROCESS                    | 130 | 0.281 | 1.204 | 0.178 | 0.318 |
| GO_TONGUE_DEVELOPMENT                                                 | 19  | 0.405 | 1.203 | 0.223 | 0.320 |
| GO_RETINOL_DEHYDROGENASE_ACTIVITY                                     | 18  | 0.453 | 1.203 | 0.254 | 0.320 |
| GO_REGULATION_OF_NUCLEOSIDE_METABOLIC_PROCESS                         | 45  | 0.309 | 1.202 | 0.182 | 0.320 |
| GO_GDP_BINDING                                                        | 48  | 0.353 | 1.201 | 0.267 | 0.322 |
| GO_MESODERMAL_CELL_DIFFERENTIATION                                    | 26  | 0.366 | 1.201 | 0.226 | 0.322 |
| GO_REGULATION_OF_BONE_RESORPTION                                      | 31  | 0.354 | 1.200 | 0.220 | 0.322 |
| GO_PROTEIN_AUTOPHOSPHORYLATION                                        | 188 | 0.273 | 1.200 | 0.207 | 0.322 |
| GO_POSITIVE_REGULATION_OF_GLIOGENESIS                                 | 45  | 0.307 | 1.200 | 0.187 | 0.322 |
| GO_INTERMEDIATE_FILAMENT_BASED_PROCESS                                | 42  | 0.383 | 1.199 | 0.266 | 0.323 |
| GO_REGULATION_OF_B_CELL_MEDIATED_IMMUNITY                             | 39  | 0.379 | 1.199 | 0.264 | 0.323 |
| GO_LYTIC_VACUOLE_ORGANIZATION                                         | 50  | 0.323 | 1.198 | 0.237 | 0.324 |
| GO_ACTIVATING_TRANSCRIPTION_FACTOR_BINDING                            | 57  | 0.321 | 1.198 | 0.237 | 0.324 |
| GO_RESPONSE_TO_OXIDATIVE_STRESS                                       | 340 | 0.250 | 1.198 | 0.161 | 0.324 |
| GO_HORMONE_TRANSPORT                                                  | 75  | 0.317 | 1.198 | 0.180 | 0.324 |
| GO_LYMPHOCYTE_COSTIMULATION                                           | 73  | 0.386 | 1.197 | 0.292 | 0.324 |
| GO_POSITIVE_REGULATION_OF_INTERLEUKIN_12_PRODUCTION                   | 33  | 0.382 | 1.197 | 0.258 | 0.325 |
| GO_RESPONSE_TO_TEMPERATURE_STIMULUS                                   | 142 | 0.264 | 1.196 | 0.173 | 0.325 |

---

|                                                                                       |     |       |       |       |       |
|---------------------------------------------------------------------------------------|-----|-------|-------|-------|-------|
| MULUS                                                                                 |     |       |       |       |       |
| GO_POSITIVE_REGULATION_OF_INTERLEUKIN_2_PRODUCTION                                    | 30  | 0.423 | 1.196 | 0.296 | 0.325 |
| GO_CALCIIUM_ION_REGULATED_EXOCYTOSIS                                                  | 74  | 0.312 | 1.195 | 0.214 | 0.326 |
| GO_GLYCEROL_3_PHOSPHATE_DERIVATIVE_METABOLIC_PROCESS                                  | 21  | 0.431 | 1.195 | 0.296 | 0.326 |
| GO_POSITIVE_REGULATION_OF_CD4_POSITIVE_ALPHA_BETA_T_CELL_ACTIVATION                   | 27  | 0.413 | 1.195 | 0.282 | 0.326 |
| GO_CILIARY_TIP                                                                        | 42  | 0.352 | 1.194 | 0.245 | 0.327 |
| GO_POSITIVE_REGULATION_OF_PRODUCTION_OF_MOLECULAR_MEDIATOR_OF_IMMUNE_RESPONSE         | 60  | 0.336 | 1.194 | 0.253 | 0.327 |
| GO_NEGATIVE_REGULATION_OF_HYDROLASE_ACTIVITY                                          | 376 | 0.254 | 1.194 | 0.155 | 0.327 |
| GO_REGULATION_OF_ACTIN_FILAMENT_LENGTH                                                | 146 | 0.274 | 1.192 | 0.203 | 0.329 |
| GO_POSITIVE_REGULATION_OF_SEQUENCE_SPECIFIC_DNA_BINDING_TRANSCRIPTION_FACTOR_ACTIVITY | 222 | 0.263 | 1.192 | 0.167 | 0.329 |
| GO_NEGATIVE_REGULATION_OF_TRANSPORTER_ACTIVITY                                        | 61  | 0.297 | 1.192 | 0.193 | 0.329 |
| GO_LYMPHOCYTE_HOMEOSTASIS                                                             | 50  | 0.345 | 1.191 | 0.246 | 0.330 |
| GO_REGULATION_OF_PRI_MIRNA_TRANSCRIPTION_FROM_RNA_POLYMERASE_II_PROMOTER              | 17  | 0.422 | 1.191 | 0.251 | 0.330 |
| GO_PHOSPHOLIPASE_ACTIVITY                                                             | 91  | 0.279 | 1.190 | 0.188 | 0.331 |
| GO_OXIDOREDUCTASE_ACTIVITY_ACTING_ON_PEROXIDE_AS_ACCEPTOR                             | 41  | 0.366 | 1.190 | 0.260 | 0.330 |
| GO_POSITIVE_REGULATION_OF_PROTEIN_ACETYLATION                                         | 35  | 0.330 | 1.190 | 0.213 | 0.330 |
| GO_DORSAL_SPINAL_CORD_DEVELOPMENT                                                     | 20  | 0.423 | 1.190 | 0.240 | 0.331 |
| GO_PROSTANOID_METABOLIC_PROCESS                                                       | 26  | 0.374 | 1.189 | 0.236 | 0.332 |
| GO_POSITIVE_REGULATION_OF_STRIATED_MUSCLE_CONTRACTION                                 | 15  | 0.408 | 1.189 | 0.251 | 0.332 |
| GO_POSITIVE_REGULATION_OF_MYELOID_CELL_DIFFERENTIATION                                | 77  | 0.287 | 1.188 | 0.188 | 0.332 |
| GO_INWARD_RECTIFIER_POTASSIUM_CHANNEL_ACTIVITY                                        | 22  | 0.378 | 1.188 | 0.230 | 0.333 |
| GO_DENDRITIC_CELL_CHEMOTAXIS                                                          | 16  | 0.482 | 1.188 | 0.309 | 0.332 |
| GO_CYTOKINE_PRODUCTION_INVOLVED                                                       | 17  | 0.421 | 1.187 | 0.258 | 0.333 |

---

|                                |     |       |       |       |       |
|--------------------------------|-----|-------|-------|-------|-------|
| ED_IN_IMMUNE_RESPONSE          |     |       |       |       |       |
| GO_NEGATIVE_REGULATION_OF_DEN  |     |       |       |       |       |
| DRITE_MORPHOGENESIS            | 15  | 0.412 | 1.187 | 0.254 | 0.333 |
| GO_SCF_UBIQUITIN_LIGASE_COMPLE |     |       |       |       |       |
| X                              | 32  | 0.351 | 1.187 | 0.234 | 0.333 |
| GO_PHAGOCYTIC_VESICLE          | 84  | 0.330 | 1.187 | 0.265 | 0.333 |
| GO_DEVELOPMENT_OF_PRIMARY_SEX  |     |       |       |       |       |
| UAL_CHARACTERISTICS            | 206 | 0.251 | 1.186 | 0.142 | 0.334 |
| GO_THYMUS_DEVELOPMENT          | 46  | 0.314 | 1.186 | 0.218 | 0.334 |
| GO_REGULATION_OF_HYDROGEN_PER  |     |       |       |       |       |
| OXIDE_INDUCED_CELL_DEATH       | 17  | 0.406 | 1.185 | 0.255 | 0.334 |
| GO_PROTEIN_KINASE_C_ACTIVITY   | 16  | 0.397 | 1.185 | 0.276 | 0.334 |
| GO_FATTY_ACID_BINDING          | 29  | 0.383 | 1.185 | 0.262 | 0.334 |
| GO_CEREBRAL_CORTEX_DEVELOPME   |     |       |       |       |       |
| NT                             | 103 | 0.283 | 1.185 | 0.200 | 0.334 |
| GO_REGULATION_OF_BINDING       | 279 | 0.242 | 1.185 | 0.138 | 0.335 |
| GO_EYE_PHOTORECEPTOR_CELL_DEV  |     |       |       |       |       |
| ELOPMENT                       | 29  | 0.361 | 1.184 | 0.252 | 0.335 |
| GO_Glutamate_SECRETION         | 27  | 0.360 | 1.184 | 0.260 | 0.335 |
| GO_NEGATIVE_REGULATION_OF_MYO  |     |       |       |       |       |
| TUBE_DIFFERENTIATION           | 16  | 0.395 | 1.183 | 0.245 | 0.336 |
| GO_PROTEIN_SELF_ASSOCIATION    | 43  | 0.304 | 1.183 | 0.206 | 0.336 |
| GO_SODIUM_ION_TRANSPORT        | 135 | 0.287 | 1.183 | 0.208 | 0.336 |
| GO_REGULATION_OF_EXTRINSIC_APO |     |       |       |       |       |
| PTOTIC_SIGNALING_PATHWAY       | 150 | 0.280 | 1.183 | 0.213 | 0.336 |
| GO_DETOXIFICATION              | 71  | 0.319 | 1.182 | 0.227 | 0.336 |
| GO_NEGATIVE_REGULATION_OF_T_CE |     |       |       |       |       |
| LL_APOPTOTIC_PROCESS           | 16  | 0.425 | 1.182 | 0.267 | 0.336 |
| GO_POSITIVE_REGULATION_OF_PROT |     |       |       |       |       |
| EIN_DEPOLYMERIZATION           | 16  | 0.401 | 1.182 | 0.246 | 0.336 |
| GO_REGULATION_OF_CYTOKINE_PRO  |     |       |       |       |       |
| DUCTION_INVOLVED_IN_INFLAMMAT  |     |       |       |       |       |
| ORY_RESPONSE                   | 18  | 0.422 | 1.182 | 0.288 | 0.336 |
| GO_RESPONSE_TO_ATP             | 30  | 0.353 | 1.181 | 0.231 | 0.337 |
| GO_NEGATIVE_REGULATION_OF_VIRA |     |       |       |       |       |
| L_ENTRY_INTO_HOST_CELL         | 17  | 0.419 | 1.181 | 0.281 | 0.337 |
| GO_NEGATIVE_REGULATION_OF_ACTI |     |       |       |       |       |
| N_FILAMENT_DEPOLYMERIZATION    | 33  | 0.351 | 1.181 | 0.254 | 0.337 |
| GO_POSITIVE_REGULATION_OF_ANIO |     |       |       |       |       |
| N_TRANSPORT                    | 56  | 0.301 | 1.181 | 0.200 | 0.337 |
| GO_NEGATIVE_REGULATION_OF_MUS  |     |       |       |       |       |
| CLE_CELL_DIFFERENTIATION       | 52  | 0.306 | 1.179 | 0.195 | 0.339 |
| GO_RAB_GUANYL_NUCLEOTIDE_EXC   |     |       |       |       |       |
| HANGE_FACTOR_ACTIVITY          | 27  | 0.369 | 1.179 | 0.258 | 0.339 |

---

|                                                                                |     |       |       |       |       |
|--------------------------------------------------------------------------------|-----|-------|-------|-------|-------|
| GO_REGULATION_OF_INTERLEUKIN_1<br>2_PRODUCTION                                 | 51  | 0.370 | 1.177 | 0.290 | 0.341 |
| GO_RESPONSE_TO_NITRIC_OXIDE                                                    | 21  | 0.382 | 1.177 | 0.261 | 0.341 |
| GO_REGULATION_OF_NEURONAL_SYN<br>APTIC_PLASTICITY                              | 46  | 0.339 | 1.177 | 0.233 | 0.342 |
| GO_MONOVALENT_INORGANIC_CATIO<br>N_HOMEOSTASIS                                 | 121 | 0.278 | 1.174 | 0.213 | 0.345 |
| GO_MYELOID_LEUKOCYTE_MEDIATE<br>D_IMMUNITY                                     | 42  | 0.366 | 1.173 | 0.249 | 0.345 |
| GO_SUPEROXIDE_METABOLIC_PROCE<br>SS                                            | 32  | 0.352 | 1.172 | 0.238 | 0.347 |
| GO_EMBRYONIC_FORELIMB_MORPHO<br>GENESIS                                        | 31  | 0.357 | 1.172 | 0.244 | 0.347 |
| GO_RAC_PROTEIN_SIGNAL_TRANSDU<br>CTION                                         | 18  | 0.392 | 1.172 | 0.305 | 0.347 |
| GO_POSITIVE_REGULATION_OF_B_CEL<br>L_MEDIATED_IMMUNITY                         | 24  | 0.409 | 1.171 | 0.303 | 0.348 |
| GO_CEREBELLAR_CORTEX_MORPHOG<br>ENESIS                                         | 30  | 0.355 | 1.170 | 0.239 | 0.348 |
| GO_PROTEIN_OLIGOMERIZATION                                                     | 420 | 0.226 | 1.170 | 0.155 | 0.348 |
| GO_CYTOSKELETAL_ADAPTOR_ACTIV<br>ITY                                           | 16  | 0.393 | 1.170 | 0.238 | 0.348 |
| GO_NEURAL_NUCLEUS_DEVELOPMEN<br>T                                              | 66  | 0.303 | 1.170 | 0.208 | 0.348 |
| GO_NEGATIVE_REGULATION_OF_POTA<br>SSIUM_ION_TRANSMEMBRANE_TRAN<br>SPORT        | 19  | 0.389 | 1.170 | 0.271 | 0.348 |
| GO_REGULATION_OF_PLASMA_MEMB<br>RANE_ORGANIZATION                              | 71  | 0.290 | 1.169 | 0.240 | 0.350 |
| GO_REGULATION_OF_CELLULAR_RES<br>PONSE_TO_INSULIN_STIMULUS                     | 55  | 0.297 | 1.169 | 0.223 | 0.350 |
| GO_POSITIVE_REGULATION_OF_I_KAP<br>PAB_KINASE_NF_KAPPAB_SIGNALING              | 176 | 0.277 | 1.168 | 0.258 | 0.350 |
| GO_WATER_TRANSPORT                                                             | 19  | 0.396 | 1.168 | 0.252 | 0.350 |
| GO_CELLULAR_RESPONSE_TO_STEROI<br>D_HORMONE_STIMULUS                           | 209 | 0.244 | 1.168 | 0.167 | 0.350 |
| GO_POSITIVE_REGULATION_OF_REAC<br>TIVE_OXYGEN_SPECIES_BIOSYNTHETI<br>C_PROCESS | 47  | 0.326 | 1.167 | 0.250 | 0.351 |
| GO_TRANSMEMBRANE_RECEPTOR_PR<br>OTEIN_PHOSPHATASE_ACTIVITY                     | 17  | 0.399 | 1.167 | 0.262 | 0.351 |
| GO_GTPASE_ACTIVITY                                                             | 233 | 0.257 | 1.167 | 0.230 | 0.351 |
| GO_APICAL_PART_OF_CELL                                                         | 346 | 0.249 | 1.167 | 0.191 | 0.351 |
| GO_ACID_SECRETION                                                              | 65  | 0.303 | 1.166 | 0.245 | 0.352 |

---

|                                                                            |     |       |       |       |       |
|----------------------------------------------------------------------------|-----|-------|-------|-------|-------|
| GO_NEGATIVE_REGULATION_OF_INTE<br>RLEUKIN_2_PRODUCTION                     | 16  | 0.431 | 1.164 | 0.286 | 0.354 |
| GO_REGULATION_OF_CELL_MATURAT<br>ION                                       | 18  | 0.366 | 1.164 | 0.259 | 0.354 |
| GO_MAMMARY_GLAND_DEVELOPME<br>NT                                           | 115 | 0.270 | 1.164 | 0.211 | 0.354 |
| GO_SYNAPTIC_VESICLE_LOCALIZATIO<br>N                                       | 99  | 0.285 | 1.163 | 0.250 | 0.354 |
| GO_MYD88_DEPENDENT_TOLL_LIKE_<br>RECEPTOR_SIGNALING_PATHWAY                | 32  | 0.382 | 1.163 | 0.307 | 0.355 |
| GO_POSITIVE_REGULATION_OF_WNT_<br>SIGNALING_PATHWAY                        | 150 | 0.261 | 1.162 | 0.218 | 0.356 |
| GO_LONG_CHAIN_FATTY_ACID_META<br>BOLIC_PROCESS                             | 88  | 0.288 | 1.162 | 0.232 | 0.356 |
| GO_ACETYLCHOLINE_RECEPTOR_ACT<br>IVITY                                     | 30  | 0.379 | 1.161 | 0.276 | 0.356 |
| GO_EMBRYONIC_CAMERA_TYPE_EYE_<br>DEVELOPMENT                               | 35  | 0.343 | 1.161 | 0.259 | 0.356 |
| GO_EMBRYONIC_DIGIT_MORPHOGENE<br>SIS                                       | 59  | 0.316 | 1.161 | 0.251 | 0.357 |
| GO_CELL_ACTIVATION_INVOLVED_IN_<br>IMMUNE_RESPONSE                         | 126 | 0.321 | 1.161 | 0.285 | 0.357 |
| GO_RESPONSE_TO_AMPHETAMINE                                                 | 30  | 0.343 | 1.161 | 0.255 | 0.357 |
| GO_CELLULAR_RESPONSE_TO_ALKAL<br>OID                                       | 32  | 0.330 | 1.159 | 0.240 | 0.359 |
| GO_ATPASE_BINDING                                                          | 73  | 0.279 | 1.158 | 0.244 | 0.360 |
| GO_PEPTIDASE_ACTIVATOR_ACTIVITY                                            | 36  | 0.317 | 1.157 | 0.272 | 0.361 |
| GO_IRON_ION_BINDING                                                        | 147 | 0.264 | 1.157 | 0.202 | 0.361 |
| GO_REGULATION_OF_ALCOHOL_BIOS<br>YNTHEIC_PROCESS                           | 44  | 0.312 | 1.156 | 0.265 | 0.361 |
| GO_MIDBRAIN_DEVELOPMENT                                                    | 88  | 0.276 | 1.156 | 0.239 | 0.362 |
| GO_XENOPHAGY                                                               | 101 | 0.259 | 1.153 | 0.234 | 0.366 |
| GO_NEGATIVE_REGULATION_OF_TRA<br>NSCRIPTION_FACTOR_IMPORT_INTO_N<br>UCLEUS | 38  | 0.325 | 1.152 | 0.250 | 0.367 |
| GO_REGULATION_OF_ACROSOME_RE<br>ACTION                                     | 17  | 0.416 | 1.152 | 0.290 | 0.367 |
| GO_POSITIVE_REGULATION_OF_ACTIV<br>ATED_T_CELL_PROLIFERATION               | 28  | 0.355 | 1.152 | 0.283 | 0.367 |
| GO_RESPONSE_TO_NERVE_GROWTH_F<br>ACTOR                                     | 37  | 0.348 | 1.151 | 0.260 | 0.367 |
| GO_NEGATIVE_REGULATION_OF_LIPA<br>SE_ACTIVITY                              | 15  | 0.467 | 1.151 | 0.289 | 0.367 |
| GO_DETECTION_OF_LIGHT_STIMULUS                                             | 54  | 0.337 | 1.150 | 0.279 | 0.368 |

|                                                                  |     |       |       |       |       |
|------------------------------------------------------------------|-----|-------|-------|-------|-------|
| GO_MICROVILLUS_MEMBRANE                                          | 19  | 0.393 | 1.150 | 0.284 | 0.368 |
| GO_REGULATION_OF_CYTOKINE_BIOSYNTHETIC_PROCESS                   | 93  | 0.326 | 1.150 | 0.287 | 0.368 |
| GO_SYNAPTIC_TRANSMISSION_GLUTAMATERGIC                           | 21  | 0.392 | 1.148 | 0.289 | 0.370 |
| GO_REGULATION_OF_INTERFERON_GAMMA_BIOSYNTHETIC_PROCESS           | 16  | 0.438 | 1.148 | 0.310 | 0.371 |
| GO_REGULATION_OF_CELL_KILLING                                    | 62  | 0.362 | 1.145 | 0.320 | 0.375 |
| GO_CELLULAR_RESPONSE_TO_DRUG                                     | 66  | 0.284 | 1.145 | 0.244 | 0.375 |
| GO_REGULATION_OF_LAMELLIPODIUM_ASSEMBLY                          | 25  | 0.351 | 1.144 | 0.290 | 0.376 |
| GO_MAINTENANCE_OF_LOCATION_IN_CELL                               | 94  | 0.273 | 1.143 | 0.225 | 0.376 |
| GO_POSITIVE_REGULATION_OF_CELL_ADHESION_MEDIATED_BY_INTEGRIN     | 17  | 0.415 | 1.142 | 0.312 | 0.377 |
| GO_MYELOID_CELL_ACTIVATION_INVOLVED_IN_IMMUNE_RESPONSE           | 41  | 0.357 | 1.142 | 0.304 | 0.377 |
| GO_MORPHOGENESIS_OF_A_POLARIZED_EPITHELIUM                       | 27  | 0.368 | 1.142 | 0.307 | 0.377 |
| GO_SEGMENTATION                                                  | 87  | 0.272 | 1.142 | 0.235 | 0.377 |
| GO_PEPTIDE_CROSS_LINKING                                         | 43  | 0.489 | 1.140 | 0.363 | 0.379 |
| GO_APICAL_PLASMA_MEMBRANE                                        | 281 | 0.251 | 1.139 | 0.229 | 0.380 |
| GO_REGULATION_OF_VESICLE_FUSION                                  | 59  | 0.311 | 1.139 | 0.295 | 0.380 |
| GO_REGULATION_OF_PROTEIN_TARGETING_TO_MEMBRANE                   | 21  | 0.362 | 1.139 | 0.254 | 0.380 |
| GO_REGULATION_OF_LEUKOCYTE_DEGRANULATION                         | 41  | 0.347 | 1.139 | 0.327 | 0.380 |
| GO_MYELOID_DENDRITIC_CELL_DIFFERENTIATION                        | 19  | 0.422 | 1.139 | 0.325 | 0.381 |
| GO_RESPONSE_TO_GROWTH_HORMONE                                    | 30  | 0.357 | 1.138 | 0.287 | 0.381 |
| GO_DETECTION_OF_VISIBLE_LIGHT                                    | 40  | 0.365 | 1.138 | 0.314 | 0.381 |
| GO_REGULATION_OF_AUTOPHAGOSOME_ASSEMBLY                          | 34  | 0.322 | 1.135 | 0.290 | 0.384 |
| GO_MESODERM_DEVELOPMENT                                          | 113 | 0.276 | 1.135 | 0.242 | 0.385 |
| GO_APICOLATERAL_PLASMA_MEMBRANE                                  | 15  | 0.406 | 1.134 | 0.260 | 0.386 |
| GO_JAK_STAT_CASCADE_INVOLVED_IN_GROWTH_HORMONE_SIGNALING_PATHWAY | 15  | 0.452 | 1.133 | 0.299 | 0.386 |
| GO_REGULATION_OF_RUFFLE_ASSEMBLY                                 | 20  | 0.359 | 1.133 | 0.311 | 0.386 |
| GO_PEPTIDE_TRANSPORT                                             | 70  | 0.297 | 1.133 | 0.246 | 0.386 |



|                                                                              |     |       |       |       |       |
|------------------------------------------------------------------------------|-----|-------|-------|-------|-------|
| GO_NEGATIVE_REGULATION_OF_LEUKOCYTE_PROLIFERATION                            | 65  | 0.324 | 1.132 | 0.292 | 0.388 |
| GO_CALMODULIN_DEPENDENT_PROTEIN_KINASE_ACTIVITY                              | 28  | 0.360 | 1.131 | 0.307 | 0.389 |
| GO_ANTIGEN_PROCESSING_AND_PRESENTATION_VIA_MHC_CLASS_II                      | 15  | 0.428 | 1.131 | 0.335 | 0.389 |
| GO_REGULATION_OF_VACUOLE_ORGANIZATION                                        | 40  | 0.313 | 1.131 | 0.292 | 0.389 |
| GO_EATING_BEHAVIOR                                                           | 30  | 0.342 | 1.131 | 0.269 | 0.389 |
| GO_MAINTENANCE_OF_PROTEIN_LOCALIZATION_IN_ORGANELLE                          | 29  | 0.333 | 1.130 | 0.279 | 0.390 |
| GO_RESPONSE_TO_UV_B                                                          | 16  | 0.380 | 1.129 | 0.325 | 0.390 |
| GO_NEUROBLAST_PROLIFERATION                                                  | 29  | 0.352 | 1.127 | 0.293 | 0.393 |
| GO_FATTY_ACID_BIOSYNTHETIC_PROCESS                                           | 102 | 0.265 | 1.127 | 0.265 | 0.393 |
| GO_WALKING_BEHAVIOR                                                          | 31  | 0.344 | 1.127 | 0.291 | 0.394 |
| GO_CHONDROCYTE_DEVELOPMENT                                                   | 21  | 0.388 | 1.126 | 0.335 | 0.394 |
| GO_SOMITE_DEVELOPMENT                                                        | 75  | 0.281 | 1.125 | 0.264 | 0.395 |
| GO_MONOCYTE_CHEMOTAXIS                                                       | 40  | 0.376 | 1.125 | 0.342 | 0.395 |
| GO_PROTEIN_LOCALIZATION_TO_CILIUM                                            | 25  | 0.363 | 1.125 | 0.335 | 0.395 |
| GO_COLUMNAR_CUBOIDAL_EPITHELIAL_CELL_DEVELOPMENT                             | 46  | 0.302 | 1.125 | 0.258 | 0.395 |
| GO_RETINOIC_ACID_BINDING                                                     | 23  | 0.378 | 1.125 | 0.302 | 0.395 |
| GO_ENDOSOME_TO_LYSOSOME_TRANSPORT                                            | 40  | 0.310 | 1.125 | 0.292 | 0.395 |
| GO_LIPID_LOCALIZATION                                                        | 253 | 0.253 | 1.124 | 0.245 | 0.395 |
| GO_NEGATIVE_REGULATION_OF_GLIAL_CELL_DIFFERENTIATION                         | 26  | 0.365 | 1.124 | 0.298 | 0.395 |
| GO_POSITIVE_REGULATION_OF_T_CELL_PROLIFERATION                               | 94  | 0.348 | 1.124 | 0.359 | 0.395 |
| GO_PHOSPHATIDYLINOSITOL_BINDING                                              | 191 | 0.248 | 1.123 | 0.256 | 0.396 |
| GO_VIRUS_RECEPTOR_ACTIVITY                                                   | 65  | 0.294 | 1.123 | 0.290 | 0.397 |
| GO_REGULATION_OF_DENDRITIC_SPLINE_DEVELOPMENT                                | 54  | 0.294 | 1.123 | 0.275 | 0.397 |
| GO_NEURAL_PRECURSOR_CELL_PROLIFERATION                                       | 70  | 0.292 | 1.122 | 0.278 | 0.397 |
| GO_REGULATION_OF_OXIDOREDUCTASE_ACTIVITY                                     | 86  | 0.261 | 1.122 | 0.245 | 0.397 |
| GO_DEVELOPMENTAL_INDUCTION                                                   | 27  | 0.343 | 1.122 | 0.296 | 0.397 |
| GO_REGULATION_OF GRANULOCYTE MACROPHAGE COLONY STIMULATING FACTOR PRODUCTION | 15  | 0.427 | 1.122 | 0.350 | 0.397 |

---

|                                                                                    |     |       |       |       |       |
|------------------------------------------------------------------------------------|-----|-------|-------|-------|-------|
| GO_REGULATION_OF_NITRIC_OXIDE_S<br>YNTHASE_ACTIVITY                                | 47  | 0.290 | 1.121 | 0.271 | 0.398 |
| GO_POSITIVE_REGULATION_OF_INTER<br>FERON_GAMMA_PRODUCTION                          | 63  | 0.365 | 1.121 | 0.363 | 0.398 |
| GO_RESPONSE_TO_HEAT                                                                | 86  | 0.276 | 1.121 | 0.271 | 0.398 |
| GO_POSITIVE_REGULATION_OF_INTRA<br>CELLULAR_PROTEIN_TRANSPORT                      | 235 | 0.225 | 1.120 | 0.227 | 0.398 |
| GO_POSITIVE_REGULATION_OF_RESP<br>ONSE_TO_CYTOKINE_STIMULUS                        | 31  | 0.325 | 1.120 | 0.309 | 0.398 |
| GO_ESTABLISHMENT_OF_EPITHELIAL<br>_CELL_POLARITY                                   | 22  | 0.355 | 1.120 | 0.332 | 0.399 |
| GO_NEGATIVE_REGULATION_OF_LYM<br>PHOCYTE_MEDIATED_IMMUNITY                         | 33  | 0.368 | 1.117 | 0.351 | 0.403 |
| GO_NEGATIVE_REGULATION_OF_B_CE<br>LL_ACTIVATION                                    | 30  | 0.362 | 1.116 | 0.341 | 0.404 |
| GO_SCF_DEPENDENT_PROTEASOMAL_<br>UBIQUITIN_DEPENDENT_PROTEIN_CA<br>TABOLIC_PROCESS | 23  | 0.348 | 1.115 | 0.306 | 0.405 |
| GO_PROTEIN_TYROSINE_KINASE_ACT<br>IVATOR_ACTIVITY                                  | 15  | 0.376 | 1.115 | 0.303 | 0.405 |
| GO_REGULATION_OF_TRANSCRIPTION<br>_INVOLVED_IN_CELL_FATE_COMMITM<br>ENT            | 20  | 0.374 | 1.114 | 0.301 | 0.406 |
| GO_POSITIVE_REGULATION_OF_DEND<br>RITIC_SPINE_DEVELOPMENT                          | 34  | 0.322 | 1.113 | 0.290 | 0.407 |
| GO_DEFENSE_RESPONSE_TO_BACTERI<br>UM                                               | 183 | 0.292 | 1.112 | 0.285 | 0.408 |
| GO_SPHINGOLIPID_METABOLIC_PROC<br>ESS                                              | 130 | 0.259 | 1.112 | 0.282 | 0.408 |
| GO_CYTOKINE_METABOLIC_PROCESS                                                      | 17  | 0.384 | 1.112 | 0.314 | 0.409 |
| GO_RESPONSE_TO_COCAINE                                                             | 45  | 0.308 | 1.111 | 0.308 | 0.409 |
| GO_LYMPHOCYTE_ACTIVATION_INVO<br>LVED_IN_IMMUNE_RESPONSE                           | 85  | 0.319 | 1.110 | 0.329 | 0.410 |
| GO_POSITIVE_REGULATION_OF_ADAP<br>TIVE_IMMUNE_RESPONSE                             | 71  | 0.335 | 1.110 | 0.353 | 0.410 |
| GO_NEGATIVE_REGULATION_OF_KIDN<br>EY_DEVELOPMENT                                   | 17  | 0.377 | 1.110 | 0.319 | 0.410 |
| GO_ERYTHROCYTE_DEVELOPMENT                                                         | 21  | 0.328 | 1.110 | 0.304 | 0.410 |
| GO_CLATHRIN_COATED_VESICLE_ME<br>MBRANE                                            | 78  | 0.294 | 1.110 | 0.332 | 0.410 |
| GO_CELLULAR_COMPONENT_MAINTEN<br>ANCE                                              | 18  | 0.371 | 1.110 | 0.317 | 0.410 |
| GO_CYTOPLASMIC_SEQUESTERING_O<br>F_TRANSCRIPTION_FACTOR                            | 19  | 0.377 | 1.110 | 0.335 | 0.410 |

---

|                                                                                                                                                                                            |     |       |       |       |       |
|--------------------------------------------------------------------------------------------------------------------------------------------------------------------------------------------|-----|-------|-------|-------|-------|
| GO_ACTIN_FILAMENT_BUNDLE_ORGANIZATION                                                                                                                                                      | 44  | 0.313 | 1.109 | 0.319 | 0.410 |
| GO_OXIDOREDUCTASE_ACTIVITY_ACTING_ON_PAIRED_DONORS_WITH_INCORPORATION_OR_REDUCTION_OF_MOLECULAR_OXYGEN_REDUCED_FLAVIN_OR_FLAVOPROTEIN_AS_ONE_DONOR_AND_INCORPORATION_OF_ONE_ATOM_OF_OXYGEN | 25  | 0.375 | 1.108 | 0.323 | 0.411 |
| GO_REGULATION_OF_ESTABLISHMENT_OF_PROTEIN_LOCALIZATION_TO_PLASMA_MEMBRANE                                                                                                                  | 46  | 0.290 | 1.108 | 0.301 | 0.412 |
| GO_PHOSPHATASE_REGULATOR_ACTIVITY                                                                                                                                                          | 82  | 0.264 | 1.108 | 0.271 | 0.412 |
| GO_ACETYLGALACTOSAMINYLTRANSFERASE_ACTIVITY                                                                                                                                                | 31  | 0.352 | 1.108 | 0.314 | 0.412 |
| GO_REGULATION_OF_LIPID_TRANSPORT                                                                                                                                                           | 92  | 0.280 | 1.106 | 0.279 | 0.415 |
| GO_REGULATION_OF_TYROSINE_PHOSPHORYLATION_OF_STAT1_PROTEIN                                                                                                                                 | 16  | 0.394 | 1.105 | 0.313 | 0.415 |
| GO_BODY_FLUID_SECRETION                                                                                                                                                                    | 68  | 0.260 | 1.105 | 0.253 | 0.416 |
| GO_TUMOR_NECROSIS_FACTOR_RECEPTOR_BINDING                                                                                                                                                  | 29  | 0.373 | 1.104 | 0.349 | 0.416 |
| GO_LIPID_TRANSPORTER_ACTIVITY                                                                                                                                                              | 102 | 0.266 | 1.101 | 0.294 | 0.420 |
| GO_CALCIIUM_DEPENDENT_PHOSPHOLIPID_BINDING                                                                                                                                                 | 53  | 0.302 | 1.101 | 0.323 | 0.420 |
| GO_KINASE_REGULATOR_ACTIVITY                                                                                                                                                               | 180 | 0.226 | 1.101 | 0.274 | 0.420 |
| GO_NEGATIVE_REGULATION_OF_ANTI GEN_RECEPTOR_MEDIATED_SIGNALING_PATHWAY                                                                                                                     | 20  | 0.393 | 1.100 | 0.341 | 0.421 |
| GO_REGULATION_OF_MACROPHAGE_DIFFERENTIATION                                                                                                                                                | 20  | 0.367 | 1.100 | 0.344 | 0.421 |
| GO_REGULATION_OF_ACTIVIN_RECEPTOR_SIGNALING_PATHWAY                                                                                                                                        | 25  | 0.366 | 1.099 | 0.327 | 0.421 |
| GO_NOSE_DEVELOPMENT                                                                                                                                                                        | 15  | 0.410 | 1.099 | 0.355 | 0.422 |
| GO_GLYCOPROTEIN_METABOLIC_PROCESS                                                                                                                                                          | 332 | 0.240 | 1.099 | 0.290 | 0.421 |
| GO_B_CELL_MEDIATED_IMMUNITY                                                                                                                                                                | 68  | 0.322 | 1.099 | 0.361 | 0.421 |
| GO_REGULATION_OF_LEUKOCYTE_MEDIATED_IMMUNITY                                                                                                                                               | 151 | 0.311 | 1.099 | 0.366 | 0.422 |
| GO_ION_ANTIPORTER_ACTIVITY                                                                                                                                                                 | 46  | 0.305 | 1.098 | 0.321 | 0.422 |
| GO_EMBRYONIC_CAMERA_TYPE_EYE_MORPHOGENESIS                                                                                                                                                 | 24  | 0.351 | 1.098 | 0.345 | 0.423 |
| GO_DEVELOPMENTAL_PROGRAMMED                                                                                                                                                                | 26  | 0.341 | 1.097 | 0.305 | 0.423 |

---

|                                                                                |     |       |       |       |       |
|--------------------------------------------------------------------------------|-----|-------|-------|-------|-------|
| _CELL_DEATH                                                                    |     |       |       |       |       |
| GO_NEGATIVE_REGULATION_OF_EPITHELIAL_CELL_DIFFERENTIATION                      | 37  | 0.301 | 1.097 | 0.324 | 0.424 |
| GO_PERICARDIUM_DEVELOPMENT                                                     | 17  | 0.362 | 1.096 | 0.345 | 0.424 |
| GO_MOVEMENT_IN_ENVIRONMENT_OF_OTHER_ORGANISM_INVOLVED_IN_SYMBIOTIC_INTERACTION | 81  | 0.277 | 1.096 | 0.335 | 0.424 |
| GO_CORE_PROMOTER_PROXIMAL_REGION_DNA_BINDING                                   | 357 | 0.230 | 1.096 | 0.279 | 0.425 |
| GO_REGULATION_OF_COLLATERAL_SPROUTING                                          | 18  | 0.374 | 1.095 | 0.337 | 0.425 |
| GO_REGULATION_OF_PROTEIN_LOCALIZATION_TO_CELL_SURFACE                          | 27  | 0.316 | 1.095 | 0.308 | 0.425 |
| GO_REGULATION_OF_PROTEIN_POLYMERIZATION                                        | 163 | 0.239 | 1.095 | 0.300 | 0.425 |
| GO_REGULATION_OF_HYDROGEN_PEROXIDE_METABOLIC_PROCESS                           | 15  | 0.384 | 1.095 | 0.326 | 0.425 |
| GO_REGULATION_OF_T_CELL_MEDIATED_CYTOTOXICITY                                  | 22  | 0.397 | 1.095 | 0.385 | 0.425 |
| GO_HORMONE_METABOLIC_PROCESS                                                   | 158 | 0.262 | 1.094 | 0.300 | 0.425 |
| GO_MESODERM_MORPHOGENESIS                                                      | 65  | 0.291 | 1.094 | 0.324 | 0.426 |
| GO_NEGATIVE_REGULATION_OF_TOLL_LIKE_RECEPTOR_SIGNALING_PATHWAY                 | 26  | 0.353 | 1.094 | 0.353 | 0.426 |
| GO_REGULATION_OF_PROTEIN_IMPORT_INTO_NUCLEUS_TRANSLOCATION                     | 21  | 0.334 | 1.094 | 0.354 | 0.426 |
| GO_LIPID_MODIFICATION                                                          | 197 | 0.238 | 1.093 | 0.289 | 0.426 |
| GO_BILE_ACID_BIOSYNTHETIC_PROCESS                                              | 20  | 0.363 | 1.093 | 0.347 | 0.426 |
| GO_INTRACELLULAR_LIPID_TRANSPORT                                               | 20  | 0.358 | 1.092 | 0.340 | 0.427 |
| GO_MONOAMINE_TRANSPORT                                                         | 21  | 0.369 | 1.092 | 0.325 | 0.428 |
| GO_POSITIVE_REGULATION_OF_MYELOID_LEUKOCYTE_MEDIATED_IMMUNITY                  | 18  | 0.376 | 1.091 | 0.351 | 0.428 |
| GO_CELLULAR_RESPONSE_TO_BIOTIC_STIMULUS                                        | 158 | 0.285 | 1.091 | 0.329 | 0.428 |
| GO_REGULATION_OF_GLYCOGEN_METABOLIC_PROCESS                                    | 33  | 0.304 | 1.091 | 0.306 | 0.429 |
| GO_EXOPEPTIDASE_ACTIVITY                                                       | 98  | 0.253 | 1.091 | 0.297 | 0.428 |
| GO_NEGATIVE_REGULATION_OF_ORGAN_GROWTH                                         | 21  | 0.331 | 1.090 | 0.333 | 0.429 |
| GO_LIMBIC_SYSTEM_DEVELOPMENT                                                   | 98  | 0.270 | 1.090 | 0.311 | 0.430 |
| GO_POSITIVE_REGULATION_OF_LYMPHOCYTE_GROWTH                                    | 26  | 0.381 | 1.090 | 0.351 | 0.429 |

---

|                                                                    |     |       |       |       |       |
|--------------------------------------------------------------------|-----|-------|-------|-------|-------|
| HOCYTE_MIGRATION                                                   |     |       |       |       |       |
| GO_RESPONSE_TO_ACTIVITY                                            | 66  | 0.266 | 1.090 | 0.303 | 0.429 |
| GO_ERYTHROCYTE_HOMEOSTASIS                                         | 69  | 0.257 | 1.089 | 0.305 | 0.430 |
| GO_POSITIVE_REGULATION_OF_DENDRITE_DEVELOPMENT                     | 63  | 0.285 | 1.088 | 0.312 | 0.431 |
| GO_GTP_DEPENDENT_PROTEIN_BINDING                                   | 17  | 0.363 | 1.088 | 0.343 | 0.431 |
| GO_PEPTIDYL_TYROSINE_AUTOPHOSPHORYLATION                           | 39  | 0.332 | 1.087 | 0.349 | 0.432 |
| GO_CELLULAR_SODIUM_ION_HOMEOSTASIS                                 | 19  | 0.362 | 1.087 | 0.350 | 0.432 |
| GO_AMINO_ACID_BETAIN METABOLIC_PROCESS                             | 18  | 0.377 | 1.085 | 0.359 | 0.434 |
| GO_REGULATION_OF_TRANSCRIPTION_REGULATORY_REGION_DNA_BINDING       | 36  | 0.300 | 1.085 | 0.334 | 0.435 |
| GO_REGULATION_OF_FATTY_ACID_TRANSPORT                              | 26  | 0.321 | 1.085 | 0.345 | 0.434 |
| GO_POSITIVE_REGULATION_OF_ESTABLISHMENT_OF_PROTEIN_LOCALIZATION    | 482 | 0.214 | 1.085 | 0.265 | 0.435 |
| GO_GLYCOLIPID_BIOSYNTHETIC_PROCESS                                 | 60  | 0.271 | 1.085 | 0.323 | 0.435 |
| GO_REGULATION_OF_INTRACELLULAR_ESTROGEN_RECEPTOR_SIGNALING_PATHWAY | 24  | 0.330 | 1.084 | 0.339 | 0.435 |
| GO_LABYRINTHINE_LAYER_DEVELOPMENT                                  | 43  | 0.304 | 1.084 | 0.329 | 0.435 |
| GO_REGULATION_OF_NEURON_APOPTOTIC_PROCESS                          | 186 | 0.236 | 1.084 | 0.289 | 0.435 |
| GO_REGULATION_OF GRANULOCYTE DIFFERENTIATION                       | 15  | 0.370 | 1.084 | 0.346 | 0.435 |
| GO_RESPONSE_TO_MINERALOCORTICOID                                   | 34  | 0.315 | 1.083 | 0.342 | 0.436 |
| GO_METENCEPHALON_DEVELOPMENT                                       | 100 | 0.281 | 1.083 | 0.329 | 0.436 |
| GO_RESPONSE_TO_FUNGUS                                              | 49  | 0.351 | 1.082 | 0.356 | 0.437 |
| GO_DECIDUALIZATION                                                 | 20  | 0.353 | 1.081 | 0.358 | 0.439 |
| GO_AMIDE_BINDING                                                   | 251 | 0.220 | 1.080 | 0.282 | 0.439 |
| GO_FATTY_ACID_DERIVATIVE_TRANSPORT                                 | 20  | 0.342 | 1.079 | 0.332 | 0.441 |
| GO_MONOCARBOXYLIC_ACID_BINDING                                     | 63  | 0.306 | 1.078 | 0.354 | 0.441 |
| GO_NEGATIVE_REGULATION_OF_ORG                                      | 22  | 0.311 | 1.078 | 0.329 | 0.441 |

---

|                                                                                 |     |       |       |       |       |
|---------------------------------------------------------------------------------|-----|-------|-------|-------|-------|
| ANELLE_ASSEMBLY                                                                 |     |       |       |       |       |
| GO_POSITIVE_REGULATION_OF_IMMUNE_EFFECTOR_PROCESS                               | 150 | 0.293 | 1.077 | 0.376 | 0.444 |
| GO_DENDRITIC_SPINE_ORGANIZATION                                                 | 17  | 0.356 | 1.076 | 0.362 | 0.444 |
| GO_TRANSCRIPTION_COREPRESSOR_ACTIVITY                                           | 213 | 0.226 | 1.076 | 0.294 | 0.444 |
| GO_REGULATION_OF_INTERLEUKIN_2_BIOSYNTHETIC_PROCESS                             | 18  | 0.427 | 1.076 | 0.404 | 0.445 |
| GO_POSITIVE_REGULATION_OF_MAST_CELL_ACTIVATION                                  | 15  | 0.391 | 1.075 | 0.388 | 0.445 |
| GO_PEROXISOME_PROLIFERATOR_ACTIVATED_RECEPTOR_BINDING                           | 15  | 0.368 | 1.075 | 0.361 | 0.445 |
| GO_NEGATIVE_REGULATION_OF_NUCLEOSIDE_METABOLIC_PROCESS                          | 18  | 0.345 | 1.073 | 0.347 | 0.448 |
| GO_R_SMAD_BINDING                                                               | 21  | 0.337 | 1.073 | 0.344 | 0.448 |
| GO_MYELOID_CELL_HOMEOSTASIS                                                     | 84  | 0.254 | 1.071 | 0.342 | 0.450 |
| GO_REGULATION_OF_SUPEROXIDE_METABOLIC_PROCESS                                   | 22  | 0.347 | 1.071 | 0.366 | 0.450 |
| GO_ENDOSOME_LUMEN                                                               | 24  | 0.368 | 1.071 | 0.356 | 0.450 |
| GO_NEGATIVE_REGULATION_OF_INTERLEUKIN_12_PRODUCTION                             | 15  | 0.452 | 1.070 | 0.416 | 0.450 |
| GO_SKELETAL_MUSCLE_TISSUE_REGENERATION                                          | 24  | 0.322 | 1.070 | 0.366 | 0.450 |
| GO_ESTABLISHMENT_OR_MAINTENANCE_OF_CELL_POLARITY                                | 134 | 0.246 | 1.070 | 0.332 | 0.451 |
| GO_TRANSCRIPTION_FACTOR_ACTIVITY_RNA_POLYMERASE_II_TRANSCRIPTION_FACTOR_BINDING | 129 | 0.241 | 1.069 | 0.314 | 0.451 |
| GO_REGULATION_OF_NF_KAPPA_B_IMPORT_INTO_NUCLEUS                                 | 47  | 0.304 | 1.069 | 0.375 | 0.452 |
| GO_MATERNAL_PLACENTA_DEVELOPMENT                                                | 30  | 0.313 | 1.069 | 0.366 | 0.452 |
| GO_MACROLIDE_BINDING                                                            | 18  | 0.354 | 1.068 | 0.413 | 0.452 |
| GO_HORMONE_ACTIVITY                                                             | 102 | 0.296 | 1.068 | 0.341 | 0.452 |
| GO_REGULATION_OF_ICOSANOID_SECRETION                                            | 20  | 0.339 | 1.067 | 0.356 | 0.453 |
| GO_PEPTIDYL_SERINE_MODIFICATION                                                 | 146 | 0.235 | 1.067 | 0.317 | 0.454 |
| GO_PORE_COMPLEX                                                                 | 17  | 0.392 | 1.065 | 0.381 | 0.456 |
| GO_RESPONSE_TO_INCREASED_OXYGEN_LEVELS                                          | 23  | 0.338 | 1.064 | 0.375 | 0.458 |
| GO_TRANSLATION_REGULATOR_ACTIVITY_NUCLEIC_ACID_BINDING                          | 18  | 0.357 | 1.064 | 0.362 | 0.457 |
| GO_POSITIVE_REGULATION_OF_EPIDERMAL_CELL_PROLIFERATION                          | 19  | 0.351 | 1.063 | 0.354 | 0.458 |

---

|                                                                                                                 |     |       |       |       |       |
|-----------------------------------------------------------------------------------------------------------------|-----|-------|-------|-------|-------|
| RMAL_CELL_DIFFERENTIATION                                                                                       |     |       |       |       |       |
| GO_TRANSCRIPTIONAL_REPRESSOR_ACTIVITY_RNA_POLYMERASE_II_CORE_PROMOTER_PROXIMAL_REGION_SEQUENCE_SPECIFIC_BINDING | 103 | 0.245 | 1.063 | 0.327 | 0.459 |
| GO_CELLULAR_RESPONSE_TO_ABiotic_STIMULUS                                                                        | 251 | 0.215 | 1.063 | 0.322 | 0.459 |
| GO_CELL_CYCLE_ARREST                                                                                            | 142 | 0.236 | 1.063 | 0.365 | 0.459 |
| GO_POSITIVE_REGULATION_OF_PROTEIN_COMPLEX_DISASSEMBLY                                                           | 22  | 0.322 | 1.061 | 0.380 | 0.460 |
| GO_REGULATION_OF_LIPOPROTEIN_LIPASE_ACTIVITY                                                                    | 15  | 0.474 | 1.061 | 0.440 | 0.461 |
| GO_REGULATION_OF_LIPID_CATABOLIC_PROCESS                                                                        | 50  | 0.317 | 1.060 | 0.376 | 0.462 |
| GO_POSITIVE_REGULATION_OF_INTERLEUKIN_1_SECRETION                                                               | 24  | 0.375 | 1.059 | 0.370 | 0.463 |
| GO_REGULATION_OF_RESPONSE_TO_CYTOKINE_STIMULUS                                                                  | 125 | 0.260 | 1.059 | 0.384 | 0.463 |
| GO_HIPPOCAMPUS_DEVELOPMENT                                                                                      | 72  | 0.267 | 1.057 | 0.360 | 0.465 |
| GO_REGULATION_OF_T_CELL_APOPTOTIC_PROCESS                                                                       | 31  | 0.330 | 1.057 | 0.358 | 0.466 |
| GO_REPRODUCTIVE_BEHAVIOR                                                                                        | 28  | 0.305 | 1.056 | 0.352 | 0.466 |
| GO_POSITIVE_REGULATION_OF_CELLULAR_RESPONSE_TO_INSULIN_STIMULUS                                                 | 20  | 0.339 | 1.056 | 0.372 | 0.466 |
| GO_SULFATION                                                                                                    | 16  | 0.384 | 1.055 | 0.385 | 0.468 |
| GO_REGULATION_OF_PEPTIDASE_ACTIVITY                                                                             | 376 | 0.227 | 1.054 | 0.316 | 0.470 |
| GO_POSITIVE_REGULATION_OF_MULTICELLULAR_ORGANISM_GROWTH                                                         | 31  | 0.309 | 1.053 | 0.360 | 0.470 |
| GO_DOPAMINE_METABOLIC_PROCESS                                                                                   | 24  | 0.323 | 1.053 | 0.377 | 0.471 |
| GO_REGULATION_OF_NATURAL_KILLER_CELL_MEDIATED_IMMUNITY                                                          | 34  | 0.373 | 1.053 | 0.433 | 0.471 |
| GO_CYTOKINE_MEDIATED_SIGNALING_PATHWAY                                                                          | 425 | 0.267 | 1.052 | 0.369 | 0.471 |
| GO_IN_UTERO_EMBRYONIC_DEVELOPMENT                                                                               | 303 | 0.217 | 1.051 | 0.367 | 0.473 |
| GO_EARLY_ENDOSOME                                                                                               | 277 | 0.226 | 1.050 | 0.341 | 0.474 |
| GO_LIPOPOLYSACCHARIDE_BINDING                                                                                   | 20  | 0.367 | 1.050 | 0.382 | 0.474 |
| GO_NEGATIVE_REGULATION_OF_STRIATED_MUSCLE_CELL_DIFFERENTIATION                                                  | 24  | 0.305 | 1.049 | 0.380 | 0.475 |
| GO_INTERMEDIATE_FILAMENT_ORGANIZATION                                                                           | 20  | 0.370 | 1.049 | 0.393 | 0.475 |

|                                                                 |     |       |       |       |       |
|-----------------------------------------------------------------|-----|-------|-------|-------|-------|
| GO_HYPEROSMOTIC_RESPONSE                                        | 19  | 0.340 | 1.045 | 0.391 | 0.480 |
| GO_REGULATION_OF_SKELETAL_MUSCLE_CELL_DIFFERENTIATION           | 15  | 0.378 | 1.044 | 0.427 | 0.482 |
| GO_REGULATION_OF_DEFENSE_RESPONSE_TO_VIRUS_BY_HOST              | 130 | 0.228 | 1.044 | 0.377 | 0.482 |
| GO_NOTOCHORD_DEVELOPMENT                                        | 18  | 0.360 | 1.044 | 0.418 | 0.482 |
| GO_REGULATION_OF_LYMPHOCYTE_APOPTOTIC_PROCESS                   | 52  | 0.305 | 1.043 | 0.397 | 0.483 |
| GO_PHOSPHATIDYLINOSITOL_3_PHOSPHATE_BINDING                     | 29  | 0.304 | 1.043 | 0.400 | 0.483 |
| GO_PROTEIN_LOCALIZATION_TO_MEMBRANE                             | 371 | 0.241 | 1.041 | 0.379 | 0.485 |
| GO_RESPONSE_TO_ISCHEMIA                                         | 28  | 0.311 | 1.041 | 0.403 | 0.485 |
| GO_MACROAUTOPHAGY                                               | 260 | 0.210 | 1.040 | 0.376 | 0.487 |
| GO_HORMONE_MEDIATED_SIGNALING_PATHWAY                           | 154 | 0.227 | 1.038 | 0.371 | 0.489 |
| GO_BASOLATERAL_PLASMA_Membrane                                  | 208 | 0.226 | 1.038 | 0.360 | 0.489 |
| GO_QUINONE_BINDING                                              | 15  | 0.362 | 1.038 | 0.415 | 0.489 |
| GO_NEGATIVE_REGULATION_OF_EXTRINSIC_APOPTOTIC_SIGNALING_PATHWAY | 97  | 0.260 | 1.037 | 0.391 | 0.491 |
| GO_ORGANONITROGEN_COMPOUND_CATABOLIC_PROCESS                    | 328 | 0.218 | 1.037 | 0.374 | 0.490 |
| GO_RESPONSE_TO_OSMOTIC_STRESS                                   | 62  | 0.259 | 1.037 | 0.386 | 0.490 |
| GO_UBIQUITIN_LIKE_PROTEIN_CONJUGATING_ENZYME_BINDING            | 32  | 0.293 | 1.036 | 0.426 | 0.491 |
| GO_PHOSPHORIC_ESTER_HYDROLASE_ACTIVITY                          | 344 | 0.198 | 1.036 | 0.348 | 0.490 |
| GO_DOPAMINE_RECEPTOR_BINDING                                    | 17  | 0.336 | 1.036 | 0.386 | 0.491 |
| GO_REGULATION_OF_SUBSTRATE_ADHESION_DEPENDENT_CELL_SPREADING    | 39  | 0.289 | 1.034 | 0.382 | 0.493 |
| GO_MYELOID_DENDRITIC_CELL_ACTIVATION                            | 25  | 0.366 | 1.034 | 0.404 | 0.493 |
| GO_POSITIVE_REGULATION_OF_RESPONSE_TO_EXTRACELLULAR_STIMULUS    | 48  | 0.279 | 1.034 | 0.407 | 0.494 |
| GO_REGULATION_OF_LYMPHOCYTE_MEDIATED_IMMUNITY                   | 109 | 0.301 | 1.032 | 0.432 | 0.497 |
| GO_STRUCTURAL_CONSTITUENT_OF_CYTOSKELETON                       | 97  | 0.262 | 1.031 | 0.421 | 0.497 |
| GO_REGULATION_OF_MITOCHONDRIAL_MEMBRANE_POTENTIAL               | 52  | 0.273 | 1.030 | 0.429 | 0.498 |



---

|                                                                                       |     |       |       |       |       |
|---------------------------------------------------------------------------------------|-----|-------|-------|-------|-------|
| GO_PHAGOCYTIC_VESICLE_MEMBRANE                                                        | 56  | 0.297 | 1.030 | 0.432 | 0.499 |
| GO_NEGATIVE_REGULATION_OF_SEQUENCE_SPECIFIC_DNA_BINDING_TRANSCRIPTION_FACTOR_ACTIVITY | 128 | 0.226 | 1.030 | 0.393 | 0.499 |
| GO_REGULATION_OF_ATPASE_ACTIVITY                                                      | 61  | 0.255 | 1.028 | 0.401 | 0.500 |
| GO_HINDLIMB_MORPHOGENESIS                                                             | 37  | 0.321 | 1.028 | 0.424 | 0.500 |
| GO_REGULATION_OF_CLATHRIN_MEDIATED_ENDOCYTOSIS                                        | 16  | 0.349 | 1.027 | 0.428 | 0.502 |
| GO_POSITIVE_REGULATION_OF_GLUCOSE_METABOLIC_PROCESS                                   | 33  | 0.286 | 1.027 | 0.400 | 0.502 |
| GO_PROTEIN_BINDING_INVOLVED_IN_CELL_ADHESION                                          | 17  | 0.366 | 1.027 | 0.424 | 0.502 |
| GO_BENZENE_CONTAINING_COMPOUND_METABOLIC_PROCESS                                      | 22  | 0.339 | 1.027 | 0.397 | 0.502 |
| GO_POSITIVE_REGULATION_OF_DENDRITE_MORPHOGENESIS                                      | 32  | 0.305 | 1.026 | 0.390 | 0.503 |
| GO_TERPENOID_METABOLIC_PROCESSES                                                      | 102 | 0.269 | 1.024 | 0.401 | 0.505 |
| GO_NEGATIVE_REGULATION_OF_LYMPHOCYTE_APOPTOTIC_PROCESS                                | 27  | 0.319 | 1.023 | 0.413 | 0.506 |
| GO_RESPONSE_TO_PROTOZOAN                                                              | 20  | 0.372 | 1.023 | 0.426 | 0.507 |
| GO_OSTEOBLAST_DEVELOPMENT                                                             | 18  | 0.352 | 1.023 | 0.435 | 0.507 |
| GO_NEGATIVE_REGULATION_OF_CYTOKINE_BIOSYNTHETIC_PROCESS                               | 28  | 0.310 | 1.023 | 0.415 | 0.507 |
| GO_MAMMARY_GLAND_LOBULE_DEVELOPMENT                                                   | 17  | 0.333 | 1.021 | 0.410 | 0.509 |
| GO_T_CELL_LINEAGE_COMMITMENT                                                          | 15  | 0.394 | 1.021 | 0.407 | 0.509 |
| GO_POSITIVE_REGULATION_OF_CARDIAC_MUSCLE_CELL_PROLIFERATION                           | 18  | 0.338 | 1.021 | 0.435 | 0.509 |
| GO_ADIPOSE_TISSUE_DEVELOPMENT                                                         | 30  | 0.308 | 1.021 | 0.416 | 0.509 |
| GO_REGULATION_OF_T_CELL_PROLIFERATION                                                 | 142 | 0.286 | 1.021 | 0.426 | 0.509 |
| GO_POSITIVE_REGULATION_OF_INTERLEUKIN_1_PRODUCTION                                    | 36  | 0.336 | 1.020 | 0.430 | 0.509 |
| GO_APOPTOTIC_PROCESS_INVOLVED_IN_MORPHOGENESIS                                        | 16  | 0.359 | 1.020 | 0.438 | 0.509 |
| GO_EPITHELIAL_CELL_FATE_COMMITMENT                                                    | 15  | 0.396 | 1.020 | 0.445 | 0.509 |
| GO_REGULATION_OF_PROTEIN_ACETYLATION                                                  | 62  | 0.252 | 1.019 | 0.409 | 0.511 |
| GO_REGULATION_OF_INSULIN_SECRETION_INVOLVED_IN_CELLULAR_RESP                          | 49  | 0.264 | 1.018 | 0.427 | 0.512 |

---

|                                                                 |     |       |       |       |       |
|-----------------------------------------------------------------|-----|-------|-------|-------|-------|
| ONSE_TO_GLUCCOSE_STIMULUS                                       |     |       |       |       |       |
| GO_ESTABLISHMENT_OF_CELL_POLARITY                               | 85  | 0.260 | 1.017 | 0.424 | 0.513 |
| GO_NITRIC_OXIDE_METABOLIC_PROCESS                               | 15  | 0.349 | 1.017 | 0.430 | 0.514 |
| GO_POSITIVE_REGULATION_OF_NATURAL_KILLER_CELL_MEDIATED_IMMUNITY | 20  | 0.398 | 1.017 | 0.443 | 0.513 |
| GO_RESPONSE_TO_FIBROBLAST_GROWTH_FACTOR                         | 114 | 0.237 | 1.017 | 0.436 | 0.513 |
| GO_AMIDE_TRANSPORT                                              | 93  | 0.249 | 1.016 | 0.432 | 0.514 |
| GO_REGULATION_OF_AUTOPHAGY                                      | 242 | 0.209 | 1.015 | 0.448 | 0.515 |
| GO_ESTABLISHMENT_OF_TISSUE_POLARITY                             | 17  | 0.348 | 1.015 | 0.427 | 0.515 |
| GO_SENSORY_PERCEPTION_OF_MECHANICAL_STIMULUS                    | 145 | 0.232 | 1.015 | 0.426 | 0.515 |
| GO_POSITIVE_REGULATION_OF_INTERLEUKIN_10_PRODUCTION             | 29  | 0.322 | 1.013 | 0.416 | 0.518 |
| GO_NEGATIVE_REGULATION_OF_T_CELL_RECEPTOR_SIGNALING_PATHWAY     | 16  | 0.354 | 1.013 | 0.443 | 0.518 |
| GO_POSITIVE_REGULATION_OF_MYELOID_LEUKOCYTE_DIFFERENTIATION     | 46  | 0.278 | 1.013 | 0.436 | 0.518 |
| GO_CHEMOKINE_ACTIVITY                                           | 45  | 0.332 | 1.012 | 0.428 | 0.520 |
| GO_GLANDULAR_EPITHELIAL_CELL_DIFFERENTIATION                    | 38  | 0.313 | 1.011 | 0.451 | 0.521 |
| GO_ACETYLCHOLINE_BINDING                                        | 24  | 0.350 | 1.010 | 0.441 | 0.522 |
| GO_ANION_CHANNEL_ACTIVITY                                       | 90  | 0.244 | 1.009 | 0.398 | 0.522 |
| GO_EMBRYONIC_PLACENTA_MORPHOGENESIS                             | 22  | 0.320 | 1.009 | 0.424 | 0.522 |
| GO_CELLULAR_RESPONSE_TO_REACTIVE_OXYGEN_SPECIES                 | 102 | 0.238 | 1.009 | 0.438 | 0.522 |
| GO_POSITIVE_REGULATION_OF_IMMUNOGLOBULIN_PRODUCTION             | 29  | 0.325 | 1.009 | 0.436 | 0.523 |
| GO_REGULATION_OF_ESTABLISHMENT_OF_PLANAR_POLARITY               | 110 | 0.259 | 1.008 | 0.419 | 0.523 |
| GO_POSITIVE_REGULATION_OF_PEPITIDE_SECRETION                    | 87  | 0.243 | 1.008 | 0.396 | 0.524 |
| GO_ORGANELLE_MEMBRANE_FUSION                                    | 91  | 0.240 | 1.007 | 0.435 | 0.525 |
| GO_RHO_GTPASE_BINDING                                           | 76  | 0.250 | 1.007 | 0.442 | 0.525 |
| GO_AMINE_METABOLIC_PROCESS                                      | 127 | 0.225 | 1.005 | 0.447 | 0.527 |
| GO_CILIARY_PART                                                 | 279 | 0.221 | 1.003 | 0.429 | 0.530 |
| GO_REGULATION_OF_DEPHOSPHORYLATION                              | 145 | 0.214 | 1.003 | 0.436 | 0.531 |
| GO_SYNTAXIN_1_BINDING                                           | 18  | 0.351 | 1.001 | 0.442 | 0.534 |

---

|                                                                     |     |       |       |       |       |
|---------------------------------------------------------------------|-----|-------|-------|-------|-------|
| GO_CELLULAR_MONOVALENT_INORGANIC_CATION_HOMEOSTASIS                 | 94  | 0.240 | 0.999 | 0.463 | 0.536 |
| GO_POSITIVE_REGULATION_OF_MONOCYTE_CHEMOTAXIS                       | 15  | 0.399 | 0.999 | 0.453 | 0.536 |
| GO_PHAGOSOME_MATURATION                                             | 37  | 0.300 | 0.998 | 0.455 | 0.537 |
| GO_EMBRYONIC_HINDLIMB_MORPHOGENESIS                                 | 29  | 0.324 | 0.998 | 0.464 | 0.537 |
| GO_RESPONSE_TO_HYDROPEROXIDE                                        | 15  | 0.363 | 0.998 | 0.454 | 0.537 |
| GO_FEEDING_BEHAVIOR                                                 | 88  | 0.262 | 0.998 | 0.441 | 0.536 |
| GO_NEGATIVE_REGULATION_OF_PROTEIN_COMPLEX_ASSEMBLY                  | 101 | 0.224 | 0.998 | 0.459 | 0.537 |
| GO_DENDRITIC_SPINE_DEVELOPMENT                                      | 19  | 0.324 | 0.996 | 0.470 | 0.538 |
| GO_CLATHRIN_COATED_VESICLE                                          | 154 | 0.239 | 0.996 | 0.446 | 0.539 |
| GO_N_GLYCAN_PROCESSING                                              | 19  | 0.336 | 0.996 | 0.442 | 0.539 |
| GO_NEURAL_TUBE_FORMATION                                            | 94  | 0.236 | 0.996 | 0.464 | 0.539 |
| GO_REGULATION_OF_CHROMATIN_BINDING                                  | 16  | 0.334 | 0.994 | 0.469 | 0.541 |
| GO_NON_CANONICAL_WNT_SIGNALING_PATHWAY                              | 135 | 0.236 | 0.994 | 0.424 | 0.541 |
| GO_DRUG_METABOLIC_PROCESS                                           | 38  | 0.320 | 0.994 | 0.460 | 0.542 |
| GO_DEFENSE_RESPONSE_TO_GRAM_POSITIVE_BACTERIUM                      | 70  | 0.285 | 0.993 | 0.446 | 0.542 |
| GO_REGULATION_OF_LEUKOCYTE_MEDIATED_CYTOTOXICITY                    | 52  | 0.325 | 0.993 | 0.492 | 0.542 |
| GO_CILIUM                                                           | 422 | 0.218 | 0.993 | 0.463 | 0.542 |
| GO_NATURAL_KILLER_CELL_ACTIVATION                                   | 41  | 0.326 | 0.992 | 0.469 | 0.543 |
| GO_POSITIVE_REGULATION_OF_ACTIN_NUCLEATION                          | 16  | 0.346 | 0.992 | 0.482 | 0.544 |
| GO_POSITIVE_REGULATION_OF_NF_KAPPA_B_TRANSSCRIPTION_FACTOR_ACTIVITY | 130 | 0.245 | 0.991 | 0.445 | 0.544 |
| GO_REGULATION_OF_PROTEIN_HOMODIMERIZATION_ACTIVITY                  | 22  | 0.288 | 0.990 | 0.488 | 0.545 |
| GO_POSITIVE_REGULATION_OF_LIPID_BIOSYNTHETIC_PROCESS                | 61  | 0.267 | 0.990 | 0.476 | 0.546 |
| GO_RECEPTOR_SIGNALING_PROTEIN_SERINE_THREONINE_KINASE_ACTIVITY      | 85  | 0.241 | 0.990 | 0.458 | 0.546 |
| GO_SKIN_EPIDERMIS_DEVELOPMENT                                       | 69  | 0.260 | 0.989 | 0.470 | 0.546 |
| GO_REGULATION_OF_EXOCYTOSIS                                         | 182 | 0.222 | 0.989 | 0.458 | 0.547 |
| GO_REACTIVE_NITROGEN_SPECIES_METABOLIC_PROCESS                      | 17  | 0.335 | 0.989 | 0.468 | 0.547 |
| GO_MITOGEN_ACTIVATED_PROTEIN_KINASE_ACTIVITY                        | 18  | 0.304 | 0.986 | 0.483 | 0.551 |

---

|                                                                       |     |       |       |       |       |
|-----------------------------------------------------------------------|-----|-------|-------|-------|-------|
| INASE_KINASE_KINASE_BINDING                                           |     |       |       |       |       |
| GO_RNA_POLYMERASE_II_TRANSCRIPTION_FACTOR_BINDING                     | 103 | 0.225 | 0.986 | 0.451 | 0.551 |
| GO_REGULATION_OF_RESPONSE_TO_OXIDATIVE_STRESS                         | 58  | 0.251 | 0.986 | 0.479 | 0.551 |
| GO_PROTEIN_HETERODIMERIZATION_ACTIVITY                                | 442 | 0.201 | 0.986 | 0.439 | 0.551 |
| GO_LEUKOCYTE_MEDIATED_IMMUNITY                                        | 157 | 0.262 | 0.986 | 0.442 | 0.551 |
| GO_CERAMIDE_METABOLIC_PROCESS                                         | 72  | 0.239 | 0.985 | 0.480 | 0.551 |
| GO_FATTY_ACID_METABOLIC_PROCESSES                                     | 282 | 0.220 | 0.984 | 0.469 | 0.552 |
| GO_POSITIVE_REGULATION_OF_TOLL_LIKE_RECEPTOR_SIGNALING_PATHWAY        | 19  | 0.340 | 0.984 | 0.479 | 0.553 |
| GO_LIPOSACCHARIDE_METABOLIC_PROCESS                                   | 109 | 0.233 | 0.983 | 0.449 | 0.554 |
| GO_MULTIVESICULAR_BODY                                                | 38  | 0.292 | 0.982 | 0.473 | 0.556 |
| GO_ENDOPEPTIDASE_ACTIVITY                                             | 399 | 0.203 | 0.981 | 0.497 | 0.556 |
| GO_CYTOKINE_SECRETION                                                 | 38  | 0.313 | 0.981 | 0.477 | 0.556 |
| GO_NEGATIVE_REGULATION_OF_CELL_KILLING                                | 18  | 0.364 | 0.981 | 0.484 | 0.556 |
| GO_REGULATION_OF_INCLUSION_BODY_ASSEMBLY                              | 16  | 0.347 | 0.978 | 0.472 | 0.560 |
| GO_REGULATION_OF_GLIAL_CELL_DIFFERENTIATION                           | 58  | 0.252 | 0.977 | 0.493 | 0.561 |
| GO_REGULATION_OF_ANOIKIS                                              | 24  | 0.296 | 0.977 | 0.472 | 0.562 |
| GO_REGULATION_OF_IMMUNOGLOBULIN_PRODUCTION                            | 45  | 0.288 | 0.977 | 0.460 | 0.561 |
| GO_ENTEROENDOCRINE_CELL_DIFFERENTIATION                               | 19  | 0.368 | 0.976 | 0.507 | 0.562 |
| GO_POSITIVE_REGULATION_OF_PROTEIN_POLYMERIZATION                      | 82  | 0.235 | 0.975 | 0.474 | 0.564 |
| GO_REGULATION_OF_ACTIVATED_T_CELL_PROLIFERATION                       | 40  | 0.287 | 0.975 | 0.473 | 0.564 |
| GO_POSITIVE_REGULATION_OF_SUBSTRATE_ADHESION_DEPENDENT_CELL_SPREADING | 26  | 0.305 | 0.975 | 0.503 | 0.564 |
| GO_REGULATION_OF_INTERLEUKIN_10_PRODUCTION                            | 44  | 0.308 | 0.975 | 0.461 | 0.564 |
| GO_1_PHOSPHATIDYLINOSITOL_BINDING                                     | 19  | 0.336 | 0.974 | 0.495 | 0.565 |
| GO_CHEMOKINE_RECEPTOR_BINDING                                         | 54  | 0.304 | 0.974 | 0.499 | 0.565 |
| GO_LIPASE_ACTIVITY                                                    | 113 | 0.225 | 0.974 | 0.510 | 0.565 |

|                                                                  |     |       |       |       |       |
|------------------------------------------------------------------|-----|-------|-------|-------|-------|
| GO_AMMONIUM_TRANSMEMBRANE_TRANSPORTER_ACTIVITY                   | 26  | 0.303 | 0.974 | 0.506 | 0.565 |
| GO_REGULATION_OF_T_CELL_RECEPTOR_SIGNALING_PATHWAY               | 27  | 0.321 | 0.973 | 0.454 | 0.565 |
| GO_REGULATION_OF_LAMELLIPODIUM_ORGANIZATION                      | 33  | 0.274 | 0.973 | 0.491 | 0.565 |
| GO_PHOSPHATIDYLINOSITOL_BIOSYNTHETIC_PROCESS                     | 119 | 0.219 | 0.972 | 0.482 | 0.566 |
| GO_REGULATION_OF_GENERATION_OF_PRECURSOR_METABOLITES_AND_ENERGY  | 82  | 0.224 | 0.972 | 0.494 | 0.567 |
| GO_OMEGA_PEPTIDASE_ACTIVITY                                      | 16  | 0.320 | 0.972 | 0.507 | 0.567 |
| GO_QUATERNARY_AMMONIUM_GROUP_BINDING                             | 49  | 0.274 | 0.971 | 0.489 | 0.568 |
| GO_POSITIVE_REGULATION_OF_ERYTHROCYTE_DIFFERENTIATION            | 23  | 0.289 | 0.971 | 0.488 | 0.568 |
| GO_CELLULAR_CARBOHYDRATE_BIOSYNTHETIC_PROCESS                    | 49  | 0.262 | 0.970 | 0.486 | 0.568 |
| GO_NEGATIVE_REGULATION_OF_PEPTIDYL_TYROSINE_PHOSPHORYLATION      | 37  | 0.262 | 0.970 | 0.508 | 0.569 |
| GO_MATERNAL_PROCESS_INVOLVED_IN_FEMALE_PREGNANCY                 | 58  | 0.247 | 0.968 | 0.506 | 0.572 |
| GO_REGULATION_OF_NEURON_MIGRATION                                | 26  | 0.299 | 0.967 | 0.492 | 0.573 |
| GO_POSITIVE_REGULATION_OF_INSULIN_SECRETION                      | 61  | 0.241 | 0.966 | 0.496 | 0.574 |
| GO_PHOTORECEPTOR_DISK_MEMBRANE                                   | 18  | 0.361 | 0.965 | 0.514 | 0.575 |
| GO_GOLGI_TO_PLASMA_MEMBRANE_PROTEIN_TRANSPORT                    | 26  | 0.286 | 0.965 | 0.512 | 0.576 |
| GO_POSITIVE_REGULATION_OF_CELL_KILLING                           | 38  | 0.337 | 0.964 | 0.498 | 0.578 |
| GO_IMMUNE_EFFECTOR_PROCESS                                       | 432 | 0.243 | 0.963 | 0.481 | 0.578 |
| GO_SULFUR_COMPOUND_METABOLIC_PROCESS                             | 343 | 0.204 | 0.963 | 0.503 | 0.579 |
| GO_INTRACELLULAR_CALCIIUM_ACTIVATED_CHLORIDE_CHANNEL_ACTIVITY    | 16  | 0.343 | 0.963 | 0.525 | 0.579 |
| GO_NEUROPEPTIDE_HORMONE_ACTIVITY                                 | 26  | 0.323 | 0.962 | 0.493 | 0.579 |
| GO_RESPIRATORY_BURST                                             | 15  | 0.397 | 0.961 | 0.514 | 0.580 |
| GO_NEGATIVE_REGULATION_OF_PROTEIN_LOCALIZATION_TO_CELL_PERIPHERY | 20  | 0.301 | 0.961 | 0.500 | 0.580 |

|                                                                               |     |       |       |       |       |
|-------------------------------------------------------------------------------|-----|-------|-------|-------|-------|
| GO_RETINA_LAYER_FORMATION                                                     | 22  | 0.308 | 0.961 | 0.506 | 0.580 |
| GO_WIDE_PORE_CHANNEL_ACTIVITY                                                 | 23  | 0.297 | 0.961 | 0.484 | 0.581 |
| GO_LEFT_RIGHT_PATTERN_FORMATIO<br>N                                           | 21  | 0.304 | 0.960 | 0.498 | 0.582 |
| GO_BITTER_TASTE_RECEPTOR_ACTIVI<br>TY                                         | 16  | 0.411 | 0.960 | 0.516 | 0.582 |
| GO_PHOTORECEPTOR_CELL_DEVELOP<br>MENT                                         | 37  | 0.280 | 0.959 | 0.495 | 0.582 |
| GO_THYROID_HORMONE_METABOLIC<br>_PROCESS                                      | 15  | 0.345 | 0.959 | 0.491 | 0.582 |
| GO_NEGATIVE_REGULATION_OF_EXO<br>CYTOSIS                                      | 26  | 0.296 | 0.958 | 0.507 | 0.583 |
| GO_REGULATION_OF_CIRCADIAN_RH<br>YTHM                                         | 97  | 0.225 | 0.958 | 0.509 | 0.584 |
| GO_REGULATION_OF_MYELOID_CELL<br>_APOPTOTIC_PROCESS                           | 23  | 0.309 | 0.957 | 0.531 | 0.586 |
| GO_MULTICELLULAR_ORGANISM_GR<br>OWTH                                          | 75  | 0.224 | 0.957 | 0.521 | 0.585 |
| GO_GLYCEROPHOSPHOLIPID_METABO<br>LIC_PROCESS                                  | 287 | 0.192 | 0.956 | 0.550 | 0.585 |
| GO_REGULATION_OF_HORMONE_BIOS<br>YNTHETIC_PROCESS                             | 18  | 0.322 | 0.956 | 0.495 | 0.585 |
| GO_LYMPHOCYTE_MEDIATED_IMMUN<br>ITY                                           | 116 | 0.263 | 0.956 | 0.475 | 0.585 |
| GO_MODULATION_OF_GROWTH_OF_S<br>YMBIONT_INVOLVED_IN_INTERACTIO<br>N_WITH_HOST | 16  | 0.398 | 0.955 | 0.551 | 0.587 |
| GO_GABA_RECEPTOR_ACTIVITY                                                     | 22  | 0.327 | 0.954 | 0.508 | 0.588 |
| GO_REGULATION_OF_RESPONSE_TO_B<br>IOTIC_STIMULUS                              | 224 | 0.207 | 0.954 | 0.520 | 0.588 |
| GO_POSITIVE_REGULATION_OF_NEUR<br>ON_DEATH                                    | 66  | 0.234 | 0.953 | 0.527 | 0.589 |
| GO_POSITIVE_REGULATION_OF_REGU<br>LATED_SECRETORY_PATHWAY                     | 49  | 0.256 | 0.953 | 0.511 | 0.589 |
| GO_PHOSPHOTYROSINE_BINDING                                                    | 15  | 0.356 | 0.953 | 0.509 | 0.589 |
| GO_ETHANOLAMINE_CONTAINING_CO<br>MPOUND_METABOLIC_PROCESS                     | 84  | 0.235 | 0.953 | 0.535 | 0.589 |
| GO_POSITIVE_REGULATION_OF_PROT<br>EIN_LOCALIZATION_TO_CELL_PERIPH<br>ERY      | 35  | 0.262 | 0.953 | 0.532 | 0.589 |
| GO_SPERM_PRINCIPAL_PIECE                                                      | 15  | 0.326 | 0.952 | 0.530 | 0.590 |
| GO_MOLTING_CYCLE                                                              | 79  | 0.250 | 0.952 | 0.476 | 0.590 |
| GO_INTERFERON_GAMMA_PRODUCTI<br>ON                                            | 15  | 0.373 | 0.951 | 0.531 | 0.592 |

---

|                                |     |       |       |       |       |
|--------------------------------|-----|-------|-------|-------|-------|
| GO_RNA_POLYMERASE_II_TRANSCRIP |     |       |       |       |       |
| TION_COFACTOR_ACTIVITY         | 89  | 0.220 | 0.950 | 0.542 | 0.593 |
| GO_STEROID_CATABOLIC_PROCESS   | 24  | 0.315 | 0.949 | 0.507 | 0.593 |
| GO_REGULATION_OF_EXTRINSIC_APO |     |       |       |       |       |
| PTOTIC_SIGNALING_PATHWAY_VIA_D |     |       |       |       |       |
| EATH_DOMAIN_RECEPTORS          | 54  | 0.262 | 0.949 | 0.524 | 0.593 |
| GO_INORGANIC_ANION_TRANSPORT   | 127 | 0.223 | 0.949 | 0.481 | 0.593 |
| GO_INORGANIC_ANION_TRANSMEMB   |     |       |       |       |       |
| RANE_TRANSPORTER_ACTIVITY      | 128 | 0.234 | 0.948 | 0.482 | 0.595 |
| GO_CELLULAR_RESPONSE_TO_CADMI  |     |       |       |       |       |
| UM_ION                         | 15  | 0.362 | 0.948 | 0.514 | 0.595 |
| GO_REGULATION_OF_MONOOXYGENA   |     |       |       |       |       |
| SE_ACTIVITY                    | 58  | 0.242 | 0.947 | 0.555 | 0.596 |
| GO_INSULIN_SECRETION           | 37  | 0.299 | 0.947 | 0.524 | 0.596 |
| GO_CORTICAL_CYTOSKELETON_ORG   |     |       |       |       |       |
| ANIZATION                      | 34  | 0.258 | 0.947 | 0.526 | 0.596 |
| GO_UTERUS_DEVELOPMENT          | 18  | 0.316 | 0.946 | 0.535 | 0.596 |
| GO_T_CELL_HOMEOSTASIS          | 34  | 0.283 | 0.946 | 0.503 | 0.597 |
| GO_REGULATION_OF_DEFENSE_RESPO |     |       |       |       |       |
| NSE_TO_VIRUS                   | 184 | 0.205 | 0.945 | 0.501 | 0.598 |
| GO_REGULATION_OF_RESPONSE_TO_F |     |       |       |       |       |
| OOD                            | 17  | 0.325 | 0.944 | 0.552 | 0.600 |
| GO_POLYSACCHARIDE_CATABOLIC_P  |     |       |       |       |       |
| ROCESS                         | 24  | 0.301 | 0.942 | 0.498 | 0.603 |
| GO_CELLULAR_RESPONSE_TO_OXIDA  |     |       |       |       |       |
| TIVE_STRESS                    | 179 | 0.203 | 0.942 | 0.560 | 0.602 |
| GO_REGULATION_OF_MEIOTIC_CELL_ |     |       |       |       |       |
| CYCLE                          | 39  | 0.253 | 0.941 | 0.533 | 0.604 |
| GO_CLATHRIN_COAT_OF_COATED_PIT | 16  | 0.322 | 0.940 | 0.526 | 0.605 |
| GO_LONG_CHAIN_FATTY_ACID_TRAN  |     |       |       |       |       |
| SPORT                          | 41  | 0.257 | 0.939 | 0.546 | 0.607 |
| GO_REGULATION_OF_CELL_ADHESIO  |     |       |       |       |       |
| N_MEDIATED_BY_INTEGRIN         | 39  | 0.287 | 0.938 | 0.541 | 0.607 |
| GO_PHOTOTRANSDUCTION           | 38  | 0.293 | 0.938 | 0.500 | 0.608 |
| GO_FEAR_RESPONSE               | 29  | 0.278 | 0.938 | 0.522 | 0.607 |
| GO_RESPONSE_TO_TOXIC_SUBSTANCE | 231 | 0.199 | 0.938 | 0.585 | 0.608 |
| GO_PHOSPHOLIPID_TRANSPORT      | 54  | 0.265 | 0.937 | 0.527 | 0.609 |
| GO_SKIN_DEVELOPMENT            | 195 | 0.265 | 0.937 | 0.498 | 0.609 |
| GO_REGULATION_OF_CILIUM_ASSEM  |     |       |       |       |       |
| BLY                            | 47  | 0.250 | 0.937 | 0.540 | 0.609 |
| GO_NUCLEOSIDE_PHOSPHATE_CATAB  |     |       |       |       |       |
| OLIC_PROCESS                   | 68  | 0.224 | 0.935 | 0.582 | 0.610 |
| GO_REGULATION_OF_DEFENSE_RESPO |     |       |       |       |       |
| NSE_TO_VIRUS_BY_VIRUS          | 29  | 0.311 | 0.934 | 0.524 | 0.612 |

|                                                                 |     |       |       |       |       |
|-----------------------------------------------------------------|-----|-------|-------|-------|-------|
| GO_PLACENTA_DEVELOPMENT                                         | 135 | 0.214 | 0.934 | 0.551 | 0.612 |
| GO_CILIARY_PLASM                                                | 72  | 0.261 | 0.934 | 0.502 | 0.613 |
| GO_PLASMA_MEMBRANE_FUSION                                       | 24  | 0.284 | 0.933 | 0.560 | 0.614 |
| GO_ACIDIC_AMINO_ACID_TRANSPORT                                  | 21  | 0.286 | 0.933 | 0.562 | 0.614 |
| GO_POSITIVE_REGULATION_OF_ALPHA_BETA_T_CELL_PROLIFERATION       | 19  | 0.378 | 0.932 | 0.553 | 0.614 |
| GO_EARLY_ENDOSOME_MEMBRANE                                      | 101 | 0.230 | 0.932 | 0.539 | 0.614 |
| GO_RESPONSE_TO_EPIDERMAL_GROWTH_FACTOR                          | 28  | 0.273 | 0.931 | 0.558 | 0.615 |
| GO_DICARBOXYLIC_ACID_TRANSPORT                                  | 70  | 0.228 | 0.930 | 0.569 | 0.617 |
| GO_ORGANIC_ACID_BINDING                                         | 199 | 0.204 | 0.930 | 0.586 | 0.617 |
| GO_NEGATIVE_REGULATION_OF_CELLULAR_RESPONSE_TO_INSULIN_STIMULUS | 30  | 0.267 | 0.930 | 0.541 | 0.617 |
| GO_PHAGOCYTTIC_CUP                                              | 17  | 0.334 | 0.930 | 0.513 | 0.617 |
| GO_POSITIVE_REGULATION_OF_CALCIUM_ION_DEPENDENT_EXOCYTOSIS      | 26  | 0.310 | 0.929 | 0.545 | 0.617 |
| GO_CEREBRAL_CORTEX_NEURON_DIFFERENTIATION                       | 22  | 0.300 | 0.928 | 0.546 | 0.619 |
| GO_PRIMARY_ALCOHOL_METABOLIC_PROCESS                            | 46  | 0.287 | 0.928 | 0.542 | 0.619 |
| GO_TRANSLATION_REGULATOR_ACTIVITY                               | 34  | 0.272 | 0.928 | 0.552 | 0.619 |
| GO_LABYRINTHINE_LAYER_BLOOD_VESSEL_DEVELOPMENT                  | 18  | 0.310 | 0.927 | 0.554 | 0.620 |
| GO_POSITIVE_REGULATION_OF_TISSUE_REMODELING                     | 24  | 0.289 | 0.927 | 0.562 | 0.620 |
| GO_REGULATION_OF_T_CELL_MEDIATED_IMMUNITY                       | 48  | 0.285 | 0.927 | 0.546 | 0.620 |
| GO_PHOSPHATIDYLINOSITOL_4_PHOSPHATE_BINDING                     | 19  | 0.300 | 0.927 | 0.567 | 0.620 |
| GO_OSTEOCLAST_DIFFERENTIATION                                   | 28  | 0.292 | 0.927 | 0.550 | 0.620 |
| GO_PROTEIN_TYROSINE_SERINE_THREONINE_PHOSPHATASE_ACTIVITY       | 43  | 0.244 | 0.927 | 0.580 | 0.620 |
| GO_RESPONSE_TO_DEXAMETHASONE                                    | 32  | 0.278 | 0.926 | 0.566 | 0.620 |
| GO_DISRUPTION_OF_CELLS_OF_OTHER_ORGANISM                        | 24  | 0.370 | 0.926 | 0.571 | 0.620 |
| GO_RESPONSE_TO_SALT                                             | 15  | 0.328 | 0.926 | 0.549 | 0.620 |
| GO_IMMUNOLOGICAL_SYNAPSE                                        | 31  | 0.313 | 0.925 | 0.533 | 0.621 |
| GO_OXIDOREDUCTASE_ACTIVITY_OXIDIZING_METAL_IONS                 | 17  | 0.321 | 0.925 | 0.565 | 0.621 |
| GO_MEMBRANE_LIPID_BIOSYNTHETIC_PROCESS                          | 107 | 0.214 | 0.924 | 0.604 | 0.623 |



|                                                           |     |       |       |       |       |
|-----------------------------------------------------------|-----|-------|-------|-------|-------|
| GO_MATING_BEHAVIOR                                        | 22  | 0.284 | 0.921 | 0.583 | 0.628 |
| GO_CADHERIN_BINDING                                       | 28  | 0.278 | 0.920 | 0.576 | 0.628 |
| GO_REGULATION_OF_HETEROTYPIC_CELL_CELL_ADHESION           | 18  | 0.346 | 0.920 | 0.581 | 0.629 |
| GO_INTERACTION_WITH_HOST                                  | 127 | 0.215 | 0.919 | 0.551 | 0.630 |
| GO_RNA_POLYMERASE_II_TRANSCRIPTION_COREPRESSOR_ACTIVITY   | 25  | 0.268 | 0.916 | 0.574 | 0.634 |
| GO_NEGATIVE_REGULATION_OF_PROTEOLYSIS                     | 313 | 0.200 | 0.915 | 0.618 | 0.636 |
| GO_EPOXYGENASE_P450_PATHWAY                               | 18  | 0.332 | 0.914 | 0.549 | 0.638 |
| GO_EPHRIN_RECEPTOR_SIGNALING_PATHWAY                      | 84  | 0.217 | 0.914 | 0.600 | 0.637 |
| GO_LATE_ENDOSOME                                          | 200 | 0.208 | 0.913 | 0.581 | 0.638 |
| GO_REGULATION_OF_COFACTOR_METABOLIC_PROCESS               | 47  | 0.239 | 0.913 | 0.585 | 0.638 |
| GO_NEGATIVE_REGULATION_OF REGULATED_SECRETORY_PATHWAY     | 20  | 0.299 | 0.912 | 0.581 | 0.639 |
| GO_ORGANIC_HYDROXY_COMPOUND_TRANSPORT                     | 149 | 0.223 | 0.912 | 0.621 | 0.639 |
| GO_CLATHRIN_VESICLE_COAT                                  | 23  | 0.282 | 0.912 | 0.584 | 0.639 |
| GO_NEGATIVE_REGULATION_OF RECEPTOR_MEDIATED_ENDOCYTOSIS   | 17  | 0.321 | 0.912 | 0.543 | 0.640 |
| GO_FEMALE_GENITALIA_DEVELOPMENT                           | 16  | 0.308 | 0.911 | 0.565 | 0.640 |
| GO_N_ACETYLGUCOSAMINE_METABOLIC_PROCESS                   | 15  | 0.305 | 0.910 | 0.601 | 0.641 |
| GO_ACUTE_INFLAMMATORY_RESPONSE                            | 70  | 0.262 | 0.910 | 0.569 | 0.642 |
| GO_MONOCARBOXYLIC_ACID_TRANSMEMBRANE_TRANSPORTER_ACTIVITY | 43  | 0.251 | 0.910 | 0.590 | 0.642 |
| GO_INTERLEUKIN_1_RECEPTOR_BINDING                         | 16  | 0.372 | 0.909 | 0.575 | 0.643 |
| GO_TOLL_LIKE_RECEPTOR_SIGNALING_PATHWAY                   | 84  | 0.265 | 0.908 | 0.551 | 0.644 |
| GO_HORMONE_BIOSYNTHETIC_PROCESS                           | 47  | 0.249 | 0.907 | 0.592 | 0.645 |
| GO_AUTOPHAGY                                              | 366 | 0.183 | 0.907 | 0.608 | 0.645 |
| GO_REGULATION_OF_MICROTUBULE_POLYMERIZATION               | 31  | 0.269 | 0.906 | 0.562 | 0.646 |
| GO_PRESYNAPTIC_ACTIVE_ZONE                                | 28  | 0.312 | 0.906 | 0.561 | 0.646 |
| GO_INOSITOL_PHOSPHATE_METABOLIC_PROCESS                   | 56  | 0.237 | 0.905 | 0.580 | 0.648 |
| GO_HYPOTHALAMUS_DEVELOPMENT                               | 23  | 0.289 | 0.905 | 0.592 | 0.648 |
| GO_NEGATIVE_REGULATION_OF_LIPID                           | 75  | 0.227 | 0.904 | 0.618 | 0.648 |

---

|                                                                          |     |       |       |       |       |
|--------------------------------------------------------------------------|-----|-------|-------|-------|-------|
| _METABOLIC_PROCESS                                                       |     |       |       |       |       |
| GO_MEMBRANE_LIPID_METABOLIC_PROCESS                                      | 174 | 0.202 | 0.902 | 0.620 | 0.652 |
| GO_ENDOLYSOSOME                                                          | 15  | 0.338 | 0.902 | 0.583 | 0.652 |
| GO_BRAIN_MORPHOGENESIS                                                   | 34  | 0.261 | 0.901 | 0.611 | 0.654 |
| GO_PROTEIN_HETEROOLIGOMERIZATION                                         | 109 | 0.215 | 0.898 | 0.601 | 0.657 |
| GO_LENS_MORPHOGENESIS_IN_CAMERA_TYPE_EYE                                 | 17  | 0.309 | 0.898 | 0.582 | 0.658 |
| GO_GLYCEROLIPID_METABOLIC_PROCESS                                        | 343 | 0.181 | 0.896 | 0.699 | 0.661 |
| GO_VESICLE_ORGANIZATION                                                  | 265 | 0.195 | 0.895 | 0.614 | 0.662 |
| GO_ORGANOPHOSPHATE_CATABOLIC_PROCESS                                     | 111 | 0.201 | 0.895 | 0.671 | 0.662 |
| GO_POSITIVE_REGULATION_OF_LYMPHOCYTE_MEDIATED_IMMUNITY                   | 67  | 0.275 | 0.895 | 0.560 | 0.662 |
| GO_NEGATIVE_REGULATION_OF_MITOCHONDRION_ORGANIZATION                     | 35  | 0.243 | 0.894 | 0.605 | 0.663 |
| GO_NEGATIVE_REGULATION_OF_RESPONSE_TO_OXIDATIVE_STRESS                   | 31  | 0.272 | 0.894 | 0.596 | 0.663 |
| GO_INFLAMMATORY_RESPONSE_TO_ANTIGENIC_STIMULUS                           | 23  | 0.303 | 0.894 | 0.568 | 0.662 |
| GO_CELL_SURFACE_RECEPTOR_SIGNALING_PATHWAY_INVOLVED_IN_HEART_DEVELOPMENT | 16  | 0.318 | 0.894 | 0.598 | 0.662 |
| GO_LRR_DOMAIN_BINDING                                                    | 17  | 0.308 | 0.894 | 0.590 | 0.663 |
| GO_TRANSPORT_VESICLE                                                     | 322 | 0.199 | 0.893 | 0.650 | 0.664 |
| GO_POSITIVE_REGULATION_OF_ACTIN_FILAMENT_POLYMERIZATION                  | 62  | 0.231 | 0.893 | 0.630 | 0.664 |
| GO_RECYCLING_ENDOSOME_MEMBRANE                                           | 38  | 0.256 | 0.893 | 0.613 | 0.664 |
| GO_AUDITORY_RECEPTOR_CELL_DEVELOPMENT                                    | 18  | 0.283 | 0.891 | 0.607 | 0.667 |
| GO_NEGATIVE_REGULATION_OF_INNATE_IMMUNE_RESPONSE                         | 35  | 0.298 | 0.890 | 0.566 | 0.667 |
| GO_DEFENSE_RESPONSE_TO_OTHER_ORGANISM                                    | 429 | 0.208 | 0.889 | 0.587 | 0.669 |
| GO_PROTEIN_KINASE_C_SIGNALING                                            | 15  | 0.311 | 0.889 | 0.641 | 0.668 |
| GO_CELLULAR_RESPONSE_TO_VIRUS                                            | 21  | 0.297 | 0.889 | 0.566 | 0.669 |
| GO_RESPONSE_TO_TRANSITION_METALL_NANOPARTICLE                            | 144 | 0.200 | 0.889 | 0.691 | 0.668 |
| GO_RESPONSE_TO_DIETARY_EXCESS                                            | 21  | 0.272 | 0.888 | 0.657 | 0.670 |
| GO_CELLULAR_RESPONSE_TO_INSULIN_STIMULUS                                 | 141 | 0.193 | 0.888 | 0.689 | 0.670 |

---

|                                                           |     |       |       |       |       |
|-----------------------------------------------------------|-----|-------|-------|-------|-------|
| GO_REGULATION_OF_MULTI_ORGANISM_PROCESS                   | 442 | 0.186 | 0.887 | 0.666 | 0.671 |
| GO_SPECTRIN_BINDING                                       | 25  | 0.273 | 0.887 | 0.618 | 0.671 |
| GO_PHOSPHATIDYLCHOLINE_METABOLISM_PROCESS                 | 63  | 0.227 | 0.887 | 0.650 | 0.671 |
| GO_REGULATION_OF_APPETITE                                 | 21  | 0.302 | 0.886 | 0.606 | 0.672 |
| GO_ACTIVATION_OF_IMMUNE_RESPONSE                          | 387 | 0.228 | 0.885 | 0.554 | 0.674 |
| GO_PEPTIDYL_ASPARAGINE_MODIFICATION                       | 39  | 0.252 | 0.885 | 0.597 | 0.673 |
| GO_NEGATIVE_REGULATION_OF_CARBONHYDRATE_METABOLIC_PROCESS | 47  | 0.231 | 0.883 | 0.659 | 0.676 |
| GO_QUATERNARY_AMMONIUM_GROUP_TRANSPORT                    | 18  | 0.301 | 0.882 | 0.612 | 0.677 |
| GO_PHOSPHOLIPASE_A2_ACTIVITY                              | 30  | 0.251 | 0.882 | 0.645 | 0.677 |
| GO_POSITIVE_REGULATION_OF_STEROID_METABOLIC_PROCESS       | 23  | 0.307 | 0.882 | 0.601 | 0.678 |
| GO_IRON_ION_HOMEOSTASIS                                   | 64  | 0.222 | 0.881 | 0.646 | 0.678 |
| GO_POSITIVE_REGULATION_OF_T_CELL_MEDIATED_CYTOTOXICITY    | 15  | 0.345 | 0.878 | 0.594 | 0.684 |
| GO_NEUROTRANSMITTER_METABOLISM_PROCESS                    | 25  | 0.271 | 0.875 | 0.647 | 0.688 |
| GO_ANTIGEN_BINDING                                        | 76  | 0.274 | 0.875 | 0.553 | 0.688 |
| GO_DETECTION_OF_STIMULUS                                  | 331 | 0.239 | 0.875 | 0.579 | 0.688 |
| GO_INORGANIC_ION_IMPORT_INTO_CELL                         | 15  | 0.303 | 0.874 | 0.642 | 0.688 |
| GO_2_OXOGLUTARATE_METABOLIC_PROCESS                       | 19  | 0.299 | 0.874 | 0.628 | 0.688 |
| GO_EMBRYONIC_PLACENTA_DEVELOPMENT                         | 82  | 0.216 | 0.874 | 0.641 | 0.688 |
| GO_LYSOSOMAL_TRANSPORT                                    | 65  | 0.228 | 0.872 | 0.632 | 0.691 |
| GO_PATTERN_RECOGNITION_RECEPTOR_SIGNALING_PATHWAY         | 107 | 0.245 | 0.871 | 0.609 | 0.693 |
| GO_ENDOCRINE_PANCREAS_DEVELOPMENT                         | 40  | 0.267 | 0.871 | 0.648 | 0.693 |
| GO_RESPONSE_TO_AMMONIUM_ION                               | 48  | 0.228 | 0.870 | 0.706 | 0.693 |
| GO_REGULATION_OF_FATTY_ACID_METABOLIC_PROCESS             | 84  | 0.222 | 0.869 | 0.661 | 0.695 |
| GO_POSITIVE_REGULATION_OF_DEFENSE_RESPONSE                | 357 | 0.211 | 0.869 | 0.589 | 0.695 |
| GO_POLYPEPTIDE_N_ACETYLGALACTOSAMINYLTRANSFERASE_ACTIVITY | 16  | 0.326 | 0.868 | 0.589 | 0.697 |
| GO_CELLULAR_IRON_ION_HOMEOSTASIS                          | 42  | 0.242 | 0.867 | 0.644 | 0.698 |

|                                                                        |     |       |       |       |       |
|------------------------------------------------------------------------|-----|-------|-------|-------|-------|
| GO_REGULATION_OF_HORMONE_METABOLIC_PROCESS                             | 26  | 0.264 | 0.866 | 0.663 | 0.699 |
| GO_THYROID_GLAND_DEVELOPMENT                                           | 25  | 0.270 | 0.865 | 0.652 | 0.701 |
| GO_C21_STEROID_HORMONE_METABOLIC_PROCESS                               | 23  | 0.283 | 0.864 | 0.663 | 0.702 |
| GO_TUMOR_NECROSIS_FACTOR_RECEPTOR_SUPERFAMILY_BINDING                  | 44  | 0.251 | 0.863 | 0.636 | 0.703 |
| GO_APOLIPOPROTEIN_BINDING                                              | 15  | 0.307 | 0.863 | 0.648 | 0.704 |
| GO_CELLULAR_HORMONE_METABOLIC_PROCESS                                  | 101 | 0.222 | 0.861 | 0.653 | 0.706 |
| GO_PHOSPHATIDYLINOSITOL_ACYL_CARRIER_REMODELING                        | 16  | 0.304 | 0.861 | 0.645 | 0.706 |
| GO_FILOPODIUM_ASSEMBLY                                                 | 17  | 0.292 | 0.861 | 0.670 | 0.706 |
| GO_AMMONIUM_ION_METABOLIC_PROCESS                                      | 166 | 0.191 | 0.860 | 0.731 | 0.708 |
| GO_BRUSH_BORDER_MEMBRANE                                               | 55  | 0.238 | 0.859 | 0.651 | 0.708 |
| GO_FOREBRAIN_REGIONALIZATION                                           | 24  | 0.266 | 0.859 | 0.657 | 0.708 |
| GO_LIPID_PARTICLE                                                      | 60  | 0.230 | 0.858 | 0.673 | 0.709 |
| GO_POSITIVE_REGULATION_OF_LEUKOCYTE_APOPTOTIC_PROCESS                  | 26  | 0.285 | 0.857 | 0.655 | 0.711 |
| GO_SODIUM_INDEPENDENT_ORGANIC_ANION_TRANSMEMBRANE_TRANSPORTER_ACTIVITY | 20  | 0.316 | 0.857 | 0.604 | 0.711 |
| GO_ORGANIC_HYDROXY_COMPOUND_METABOLIC_PROCESS                          | 472 | 0.179 | 0.855 | 0.735 | 0.714 |
| GO_MONOCARBOXYLIC_ACID_TRANSPORT                                       | 118 | 0.202 | 0.853 | 0.721 | 0.718 |
| GO_REGULATION_OF_TOLL_LIKE_RECEPTOR_SIGNALING_PATHWAY                  | 46  | 0.255 | 0.850 | 0.649 | 0.723 |
| GO_PROTEIN_KINASE_A_CATALYTIC_SUBUNIT_BINDING                          | 15  | 0.287 | 0.849 | 0.653 | 0.723 |
| GO_EPIDERMAL_GROWTH_FACTOR_RECEPTOR_BINDING                            | 30  | 0.252 | 0.848 | 0.699 | 0.725 |
| GO_POSITIVE_REGULATION_OF_EPIDERMIS_DEVELOPMENT                        | 31  | 0.257 | 0.846 | 0.658 | 0.728 |
| GO_CEREBELLAR_CORTEX_FORMATION                                         | 22  | 0.277 | 0.846 | 0.669 | 0.728 |
| GO_FIBROBLAST_GROWTH_FACTOR_BINDING                                    | 23  | 0.260 | 0.845 | 0.676 | 0.729 |
| GO_ANATOMICAL_STRUCTURE_ARRANGEMENT                                    | 17  | 0.277 | 0.844 | 0.653 | 0.730 |
| GO_REGULATION_OF_EXECUTION_PHASE_OF_APOPTOSIS                          | 24  | 0.254 | 0.843 | 0.671 | 0.731 |
| GO_INNER_EAR_RECEPTOR_STEREOCILIATION                                  | 19  | 0.275 | 0.840 | 0.682 | 0.736 |

|                                 |     |       |       |       |       |
|---------------------------------|-----|-------|-------|-------|-------|
| LIUM_ORGANIZATION               |     |       |       |       |       |
| GO_REGULATION_OF_PH             | 87  | 0.203 | 0.839 | 0.737 | 0.738 |
| GO_LIPOPOLYSACCHARIDE_MEDIATE   |     |       |       |       |       |
| D_SIGNALING_PATHWAY             | 31  | 0.286 | 0.839 | 0.644 | 0.738 |
| GO_ATPASE_ACTIVITY_COUPLED_TO_  |     |       |       |       |       |
| TRANSMEMBRANE_MOVEMENT_OF_I     |     |       |       |       |       |
| ONS_PHOSPHORYLATIVE_MECHANISM   | 33  | 0.248 | 0.839 | 0.719 | 0.738 |
| GO_ANTIPORTER_ACTIVITY          | 70  | 0.215 | 0.838 | 0.732 | 0.738 |
| GO_MITOGEN_ACTIVATED_PROTEIN_K  |     |       |       |       |       |
| INASE_BINDING                   | 24  | 0.269 | 0.837 | 0.670 | 0.740 |
| GO_PROTEIN_SERINE_THREONINE_KI  |     |       |       |       |       |
| NASE_INHIBITOR_ACTIVITY         | 30  | 0.250 | 0.837 | 0.696 | 0.740 |
| GO_CHOLESTEROL_EFFLUX           | 26  | 0.328 | 0.832 | 0.678 | 0.748 |
| GO_RESPONSE_TO_INTERFERON_ALP   |     |       |       |       |       |
| HA                              | 20  | 0.316 | 0.832 | 0.630 | 0.748 |
| GO_REACTIVE_OXYGEN_SPECIES_BIO  |     |       |       |       |       |
| SYNTHETIC_PROCESS               | 23  | 0.260 | 0.832 | 0.706 | 0.748 |
| GO_NEGATIVE_REGULATION_OF_INTR  |     |       |       |       |       |
| INSIC_APOPTOTIC_SIGNALING_PATHW |     |       |       |       |       |
| AY_IN_RESPONSE_TO_DNA_DAMAGE    | 25  | 0.250 | 0.830 | 0.699 | 0.750 |
| GO_T_HELPER_1_TYPE_IMMUNE_RESP  |     |       |       |       |       |
| ONSE                            | 19  | 0.304 | 0.830 | 0.625 | 0.750 |
| GO_RNA_POLYMERASE_II_ACTIVATIN  |     |       |       |       |       |
| G_TRANSCRIPTION_FACTOR_BINDING  | 36  | 0.236 | 0.830 | 0.683 | 0.750 |
| GO_GOLGI_TO_PLASMA_MEMBRANE_    |     |       |       |       |       |
| TRANSPORT                       | 41  | 0.220 | 0.827 | 0.730 | 0.754 |
| GO_FIBRINOLYSIS                 | 21  | 0.337 | 0.827 | 0.724 | 0.754 |
| GO_NEGATIVE_REGULATION_OF_INTE  |     |       |       |       |       |
| RLEUKIN_10_PRODUCTION           | 16  | 0.319 | 0.826 | 0.636 | 0.755 |
| GO_MONOSACCHARIDE_TRANSMEMB     |     |       |       |       |       |
| RANE_TRANSPORTER_ACTIVITY       | 20  | 0.277 | 0.826 | 0.659 | 0.755 |
| GO_RESPONSE_TO_COPPER_ION       | 27  | 0.245 | 0.826 | 0.717 | 0.755 |
| GO_T_CELL_MEDIATED_IMMUNITY     | 28  | 0.270 | 0.826 | 0.668 | 0.755 |
| GO_PHOSPHOLIPID_DEPHOSPHORYLA   |     |       |       |       |       |
| TION                            | 24  | 0.274 | 0.825 | 0.669 | 0.755 |
| GO_PROTEIN_O_LINKED_GLYCOSYLA   |     |       |       |       |       |
| TION                            | 90  | 0.207 | 0.825 | 0.718 | 0.756 |
| GO_PHOSPHATIDYLINOSITOL_PHOSPH  |     |       |       |       |       |
| ATE_KINASE_ACTIVITY             | 15  | 0.298 | 0.824 | 0.685 | 0.757 |
| GO_ATPASE_ACTIVITY_COUPLED_TO_  |     |       |       |       |       |
| MOVEMENT_OF_SUBSTANCES          | 120 | 0.192 | 0.824 | 0.800 | 0.757 |
| GO_PHOSPHATIDYLINOSITOL_DEPHOS  |     |       |       |       |       |
| PHORYLATION                     | 23  | 0.278 | 0.824 | 0.667 | 0.757 |
| GO_NEGATIVE_REGULATION_OF_PROT  | 19  | 0.259 | 0.823 | 0.713 | 0.758 |

|                                                           |     |       |       |       |       |
|-----------------------------------------------------------|-----|-------|-------|-------|-------|
| EIN_TYROSINE_KINASE_ACTIVITY                              |     |       |       |       |       |
| GO_CARBOHYDRATE_BIOSYNTHETIC_PROCESS                      | 118 | 0.205 | 0.823 | 0.701 | 0.758 |
| GO_REGULATION_OF_SYNAPTIC_TRANSMISSION_DOPAMINERGIC       | 17  | 0.289 | 0.823 | 0.703 | 0.758 |
| GO_POST_ANAL_TAIL_MORPHOGENESIS                           | 18  | 0.269 | 0.822 | 0.711 | 0.759 |
| GO_POSITIVE_REGULATION_OF_OXIDOREDUCTASE_ACTIVITY         | 44  | 0.222 | 0.820 | 0.773 | 0.761 |
| GO_FATTY_ACID_TRANSPORT                                   | 55  | 0.212 | 0.820 | 0.762 | 0.761 |
| GO_RESPONSE_TO_ANGIOTENSIN                                | 17  | 0.273 | 0.819 | 0.753 | 0.762 |
| GO_ACTIN_FILAMENT_POLYMERIZATION                          | 21  | 0.260 | 0.818 | 0.728 | 0.763 |
| GO_REGULATION_OF_LYMPHOCYTE_CHEMOTAXIS                    | 20  | 0.307 | 0.818 | 0.650 | 0.763 |
| GO_REGULATION_OF_LIPID_BIOSYNTHETIC_PROCESS               | 121 | 0.191 | 0.818 | 0.773 | 0.763 |
| GO_STEROL_TRANSPORT                                       | 49  | 0.256 | 0.818 | 0.725 | 0.763 |
| GO_SERTOLI_CELL_DEVELOPMENT                               | 15  | 0.295 | 0.816 | 0.717 | 0.766 |
| GO_CEREBELLAR_CORTEX_DEVELOPMENT                          | 46  | 0.229 | 0.815 | 0.778 | 0.766 |
| GO_REGULATION_OF_DENDRITE_EXTENSION                       | 17  | 0.277 | 0.814 | 0.737 | 0.768 |
| GO_PROTEIN_HYDROXYLATION                                  | 15  | 0.300 | 0.814 | 0.677 | 0.768 |
| GO_PROTEIN_MATURATION                                     | 252 | 0.175 | 0.812 | 0.835 | 0.770 |
| GO_MEMBRANE_PROTEIN_PROTEOLYSIS                           | 34  | 0.238 | 0.809 | 0.721 | 0.775 |
| GO_SENSORY_PERCEPTION_OF_TASTE                            | 51  | 0.258 | 0.809 | 0.708 | 0.775 |
| GO_BRANCHING_INVOLVED_IN_MAMMARY_GLAND_DUCT_MORPHOGENESIS | 20  | 0.267 | 0.809 | 0.726 | 0.775 |
| GO_BILE_ACID_METABOLIC_PROCESS                            | 35  | 0.242 | 0.808 | 0.735 | 0.777 |
| GO_RESPONSE_TO_LEPTIN                                     | 20  | 0.259 | 0.807 | 0.749 | 0.778 |
| GO_POSITIVE_REGULATION_OF_LEUKOCYTE_MEDIATED_IMMUNITY     | 83  | 0.241 | 0.807 | 0.657 | 0.778 |
| GO_TASTE_RECEPTOR_ACTIVITY                                | 20  | 0.323 | 0.807 | 0.634 | 0.778 |
| GO_ANION_TRANSPORT                                        | 487 | 0.169 | 0.806 | 0.870 | 0.778 |
| GO_REGULATION_OF_STEROL_TRANSPORT                         | 38  | 0.261 | 0.806 | 0.729 | 0.778 |
| GO_MONOCARBOXYLIC_ACID_METABOLIC_PROCESS                  | 480 | 0.172 | 0.806 | 0.834 | 0.778 |
| GO_EPHRIN_RECEPTOR_BINDING                                | 24  | 0.252 | 0.804 | 0.740 | 0.781 |
| GO_POSITIVE_REGULATION_OF_GLIAL_CELL_DIFFERENTIATION      | 31  | 0.226 | 0.803 | 0.807 | 0.782 |

---

|                                                                                               |     |       |       |       |       |
|-----------------------------------------------------------------------------------------------|-----|-------|-------|-------|-------|
| GO_REGULATION_OF_TRANSCRIPTION<br>_FROM_RNA_POLYMERASE_II_PROMO<br>TER_IN_RESPONSE_TO_HYPOXIA | 30  | 0.227 | 0.803 | 0.719 | 0.783 |
| GO_INDOLALKYLAMINE_METABOLIC_<br>PROCESS                                                      | 16  | 0.278 | 0.798 | 0.742 | 0.790 |
| GO_POSITIVE_REGULATION_OF_NITRI<br>C_OXIDE_SYNTHASE_ACTIVITY                                  | 20  | 0.270 | 0.796 | 0.756 | 0.792 |
| GO_NEGATIVE_REGULATION_OF_NF_K<br>APPAB_IMPORT_INTO_NUCLEUS                                   | 17  | 0.276 | 0.796 | 0.764 | 0.792 |
| GO_PROTEIN_SERINE_THREONINE_TY<br>ROSINE_KINASE_ACTIVITY                                      | 39  | 0.212 | 0.795 | 0.802 | 0.793 |
| GO_IMPORT_INTO_CELL                                                                           | 36  | 0.226 | 0.795 | 0.781 | 0.793 |
| GO_AMELOGENESIS                                                                               | 19  | 0.263 | 0.793 | 0.744 | 0.797 |
| GO_EMBRYONIC_PATTERN_SPECIFICA<br>TION                                                        | 57  | 0.212 | 0.792 | 0.788 | 0.796 |
| GO_CELLULAR_RESPONSE_TO_LEPTIN<br>_STIMULUS                                                   | 16  | 0.279 | 0.792 | 0.764 | 0.796 |
| GO_NON_MEMBRANE_SPANNING_PRO<br>TEIN_TYROSINE_KINASE_ACTIVITY                                 | 45  | 0.229 | 0.792 | 0.720 | 0.796 |
| GO_DETECTION_OF_CHEMICAL_STIM<br>ULUS_INVOLVED_IN_SENSORY_PERCE<br>PTION_OF_TASTE             | 33  | 0.276 | 0.792 | 0.725 | 0.797 |
| GO_I_KAPPAB_KINASE_NF_KAPPAB_SI<br>GNALING                                                    | 69  | 0.216 | 0.792 | 0.734 | 0.797 |
| GO_STEROL_HOMEOSTASIS                                                                         | 56  | 0.243 | 0.792 | 0.715 | 0.796 |
| GO_PHOSPHATIDYLETHANOLAMINE_<br>ACYL_CHAIN_REMODELING                                         | 23  | 0.250 | 0.791 | 0.775 | 0.797 |
| GO_RETINOL_METABOLIC_PROCESS                                                                  | 28  | 0.256 | 0.789 | 0.747 | 0.800 |
| GO_ENDOSOMAL_PART                                                                             | 402 | 0.174 | 0.786 | 0.794 | 0.804 |
| GO_REGULATION_OF_MYELINATION                                                                  | 29  | 0.241 | 0.784 | 0.766 | 0.807 |
| GO_ALCOHOL_METABOLIC_PROCESS                                                                  | 341 | 0.168 | 0.783 | 0.880 | 0.808 |
| GO_REGULATION_OF_EARLY_ENDOSO<br>ME_TO_LATE_ENDOSOME_TRANSPOR<br>T                            | 16  | 0.273 | 0.782 | 0.752 | 0.809 |
| GO_STEROL_METABOLIC_PROCESS                                                                   | 120 | 0.194 | 0.781 | 0.786 | 0.810 |
| GO_NEGATIVE_REGULATION_OF_DEN<br>DRITE_DEVELOPMENT                                            | 27  | 0.223 | 0.781 | 0.809 | 0.811 |
| GO_NEUROTRANSMITTER_TRANSPOR<br>TER_ACTIVITY                                                  | 24  | 0.257 | 0.780 | 0.780 | 0.812 |
| GO_SODIUM_INDEPENDENT_ORGANIC<br>_ANION_TRANSPORT                                             | 22  | 0.280 | 0.780 | 0.715 | 0.812 |
| GO_REGULATION_OF_INSULIN_RECEP<br>TOR_SIGNALING_PATHWAY                                       | 40  | 0.208 | 0.780 | 0.805 | 0.812 |
| GO_MEMBRANE_FUSION                                                                            | 143 | 0.167 | 0.779 | 0.890 | 0.812 |

|                                                                                               |     |       |       |       |       |
|-----------------------------------------------------------------------------------------------|-----|-------|-------|-------|-------|
| GO_T_CELL_RECEPTOR_COMPLEX                                                                    | 19  | 0.325 | 0.779 | 0.667 | 0.812 |
| GO_RECEPTOR_CATABOLIC_PROCESS                                                                 | 16  | 0.264 | 0.779 | 0.756 | 0.812 |
| GO_SYNAPTIC_VESICLE_RECYCLING                                                                 | 23  | 0.243 | 0.778 | 0.769 | 0.814 |
| GO_POSITIVE_REGULATION_OF_MICROTUBULE_POLYMERIZATION                                          | 18  | 0.262 | 0.777 | 0.753 | 0.814 |
| GO_NEGATIVE_REGULATION_OF_TOR_SIGNALING                                                       | 30  | 0.220 | 0.777 | 0.784 | 0.814 |
| GO_ORGANIC_ANION_TRANSPORT                                                                    | 368 | 0.166 | 0.776 | 0.908 | 0.815 |
| GO_SIGNAL_TRANSDUCTION_IN_ABSENCE_OF_LIGAND                                                   | 33  | 0.210 | 0.775 | 0.821 | 0.816 |
| GO_TOR_SIGNALING                                                                              | 16  | 0.256 | 0.775 | 0.761 | 0.816 |
| GO_OTIC_VESICLE_DEVELOPMENT                                                                   | 15  | 0.279 | 0.775 | 0.742 | 0.816 |
| GO_ORGANIC_ACID_TRANSPORT                                                                     | 251 | 0.171 | 0.772 | 0.894 | 0.820 |
| GO_AMINO_ACID_TRANSPORT                                                                       | 120 | 0.181 | 0.771 | 0.858 | 0.821 |
| GO_RESPONSE_TO_XENOBIOTIC_STIMULUS                                                            | 101 | 0.210 | 0.770 | 0.775 | 0.823 |
| GO_NOTCH_BINDING                                                                              | 18  | 0.259 | 0.767 | 0.773 | 0.826 |
| GO_ALCOHOL_TRANSMEMBRANE_TRANSPORTER_ACTIVITY                                                 | 23  | 0.243 | 0.766 | 0.784 | 0.828 |
| GO_SH2_DOMAIN_BINDING                                                                         | 28  | 0.239 | 0.765 | 0.753 | 0.829 |
| GO_ORGANELLE_FUSION                                                                           | 121 | 0.169 | 0.762 | 0.920 | 0.833 |
| GO_ENTRAINMENT_OF_CIRCADIAN_CLOCK_BY_PHOTOPERIOD                                              | 18  | 0.253 | 0.760 | 0.788 | 0.835 |
| GO_CELLULAR_PIGMENTATION                                                                      | 43  | 0.202 | 0.760 | 0.827 | 0.835 |
| GO_MONOSACCHARIDE_BINDING                                                                     | 65  | 0.198 | 0.760 | 0.826 | 0.835 |
| GO_RESPONSE_TO_INSULIN                                                                        | 199 | 0.157 | 0.759 | 0.943 | 0.837 |
| GO_NEGATIVE_REGULATION_OF_NFKBAPPA_TRANSCRIPTION_FACTOR_ACTIVITY                              | 61  | 0.188 | 0.758 | 0.855 | 0.837 |
| GO_POSITIVE_REGULATION_OF_INSULIN_SECRETION_INVOLVED_IN_CELLULAR_RESPONSE_TO_GLUCOSE_STIMULUS | 25  | 0.231 | 0.758 | 0.838 | 0.837 |
| GO_REGULATION_OF_TOR_SIGNALING                                                                | 64  | 0.185 | 0.757 | 0.828 | 0.838 |
| GO_REGULATION_OF_PEPTIDYL_THREONINE_PHOSPHORYLATION                                           | 35  | 0.218 | 0.757 | 0.847 | 0.839 |
| GO_TRIGLYCERIDE_CATABOLIC_PROCESS                                                             | 20  | 0.296 | 0.754 | 0.763 | 0.841 |
| GO_VACUOLAR_ACIDIFICATION                                                                     | 15  | 0.275 | 0.754 | 0.773 | 0.841 |
| GO_REGULATION_OF_T_CELL_CYTOKINE_PRODUCTION                                                   | 19  | 0.268 | 0.754 | 0.749 | 0.841 |
| GO_TRANSPORT_VESICLE_MEMBRANE                                                                 | 145 | 0.189 | 0.752 | 0.864 | 0.844 |
| GO_ANION_TRANSMEMBRANE_TRANSPORT                                                              | 286 | 0.165 | 0.752 | 0.908 | 0.844 |



| PORTER_ACTIVITY                                                       |     |       |       |       |       |
|-----------------------------------------------------------------------|-----|-------|-------|-------|-------|
| GO_T_CELL_APOPTOTIC_PROCESS                                           | 15  | 0.278 | 0.750 | 0.773 | 0.846 |
| GO_REGULATION_OF_STEROID_METABOLIC_PROCESS                            | 73  | 0.194 | 0.749 | 0.856 | 0.847 |
| GO_RAB_GTPASE_BINDING                                                 | 113 | 0.191 | 0.748 | 0.840 | 0.849 |
| GO_REGULATION_OF_ALPHA_BETA_T_CELL_PROLIFERATION                      | 22  | 0.290 | 0.748 | 0.716 | 0.849 |
| GO_ORGANIC_CATION_TRANSPORT                                           | 19  | 0.259 | 0.747 | 0.810 | 0.849 |
| GO_EPIDERMAL_GROWTH_FACTOR_RECEPTOR_SIGNALING_PATHWAY                 | 53  | 0.208 | 0.747 | 0.818 | 0.849 |
| GO_MODULATION_BY_HOST_OF_VIRAL_PROCESS                                | 17  | 0.248 | 0.744 | 0.814 | 0.852 |
| GO_CILIUM_MORPHOGENESIS                                               | 183 | 0.181 | 0.744 | 0.794 | 0.853 |
| GO_PHOSPHATIDYLINOSITOL_3_KINASE_COMPLEX                              | 19  | 0.270 | 0.743 | 0.765 | 0.854 |
| GO_AXONEME_ASSEMBLY                                                   | 34  | 0.241 | 0.741 | 0.721 | 0.856 |
| GO_IMMUNE_RESPONSE_REGULATING_CELL_SURFACE_RECEPTOR_SIGNALING_PATHWAY | 286 | 0.195 | 0.739 | 0.757 | 0.858 |
| GO_PLASMA_LIPOPROTEIN_PARTICLE_CLEARANCE                              | 21  | 0.322 | 0.736 | 0.807 | 0.862 |
| GO_PHOSPHATIDYLCHOLINE_ACYL_CARRIER_REMODELING                        | 26  | 0.220 | 0.735 | 0.865 | 0.863 |
| GO_NEUROTRANSMITTER_BINDING                                           | 30  | 0.237 | 0.735 | 0.816 | 0.863 |
| GO_SINGLE_ORGANISM_MEMBRANE_FUSION                                    | 118 | 0.163 | 0.734 | 0.927 | 0.863 |
| GO_BILE_ACID_TRANSMEMBRANE_TRANSPORTER_ACTIVITY                       | 15  | 0.257 | 0.734 | 0.826 | 0.864 |
| GO_SYNTAXIN_BINDING                                                   | 88  | 0.180 | 0.732 | 0.914 | 0.867 |
| GO_POSITIVE_REGULATION_OF_RESPONSE_TO_BIOTIC_STIMULUS                 | 37  | 0.221 | 0.729 | 0.844 | 0.869 |
| GO_POSITIVE_REGULATION_OF_LEUKOCYTE_DEGRANULATION                     | 18  | 0.246 | 0.728 | 0.830 | 0.871 |
| GO_SNARE_BINDING                                                      | 121 | 0.168 | 0.726 | 0.906 | 0.873 |
| GO_CELL_DEATH_IN_RESPONSE_TO_OXIDATIVE_STRESS                         | 18  | 0.244 | 0.721 | 0.839 | 0.880 |
| GO_LUNG_EPITHELIUM_DEVELOPMENT                                        | 34  | 0.205 | 0.721 | 0.890 | 0.879 |
| GO_ERBB_SIGNALING_PATHWAY                                             | 77  | 0.180 | 0.717 | 0.891 | 0.883 |
| GO_MULTICELLULAR_ORGANISMAL_MOVEMENT                                  | 41  | 0.199 | 0.716 | 0.910 | 0.884 |
| GO_ARACHIDONIC_ACID_MONOOXYGENASE_ACTIVITY                            | 15  | 0.278 | 0.715 | 0.800 | 0.886 |
| GO_STEROID_METABOLIC_PROCESS                                          | 231 | 0.169 | 0.714 | 0.902 | 0.887 |

|                                                                                           |     |       |       |       |       |
|-------------------------------------------------------------------------------------------|-----|-------|-------|-------|-------|
| GO_CYTOLYSIS                                                                              | 23  | 0.258 | 0.712 | 0.818 | 0.889 |
| GO_SOLUTE_PROTON_ANTIPORTER_ACTIVITY                                                      | 17  | 0.247 | 0.710 | 0.807 | 0.890 |
| GO_POSITIVE_REGULATION_OF_LIPID_CATABOLIC_PROCESS                                         | 25  | 0.243 | 0.708 | 0.822 | 0.892 |
| GO_SENSORY_PERCEPTION_OF_CHEMICAL_STIMULUS                                                | 181 | 0.235 | 0.707 | 0.740 | 0.894 |
| GO_UDP_GLYCOSYLTRANSFERASE_ACTIVITY                                                       | 127 | 0.171 | 0.706 | 0.922 | 0.895 |
| GO_RESPONSE_TO_VITAMIN_E                                                                  | 15  | 0.241 | 0.705 | 0.882 | 0.896 |
| GO_MONOSACCHARIDE_TRANSPORT                                                               | 53  | 0.184 | 0.703 | 0.920 | 0.897 |
| GO_VACUOLE_FUSION                                                                         | 22  | 0.227 | 0.702 | 0.858 | 0.898 |
| GO_PHOTORECEPTOR_CELL_MAINTENANCE                                                         | 33  | 0.216 | 0.702 | 0.866 | 0.898 |
| GO_REGULATION_OF_PROTEIN_TYROSINE_KINASE_ACTIVITY                                         | 59  | 0.179 | 0.700 | 0.927 | 0.900 |
| GO_REGULATION_OF_PLASMA_LIPOPROTEIN_PARTICLE_LEVELS                                       | 45  | 0.245 | 0.699 | 0.816 | 0.900 |
| GO_HIGH_DENSITY_LIPOPROTEIN_PARTICLE                                                      | 25  | 0.304 | 0.698 | 0.809 | 0.902 |
| GO_EPIDERMIS_DEVELOPMENT                                                                  | 236 | 0.194 | 0.697 | 0.779 | 0.902 |
| GO_PHOTOPERIODISM                                                                         | 23  | 0.215 | 0.696 | 0.904 | 0.904 |
| GO_CELLULAR_RESPONSE_TO_INTERFERON_GAMMA                                                  | 117 | 0.220 | 0.695 | 0.711 | 0.904 |
| GO_OXIDOREDUCTASE_ACTIVITY_ACTING_ON_SINGLE_DONORS_WITH_INCORPORATION_OF_MOLECULAR_OXYGEN | 26  | 0.210 | 0.694 | 0.906 | 0.905 |
| GO_LYSOPHOSPHOLIPASE_ACTIVITY                                                             | 19  | 0.227 | 0.694 | 0.895 | 0.904 |
| GO_AMINO_ACID_IMPORT                                                                      | 15  | 0.252 | 0.692 | 0.861 | 0.906 |
| GO_DRUG_TRANSPORTER_ACTIVITY                                                              | 21  | 0.222 | 0.690 | 0.898 | 0.909 |
| GO_ODORANT_BINDING                                                                        | 18  | 0.290 | 0.689 | 0.829 | 0.909 |
| GO_GTP_RHO_BINDING                                                                        | 16  | 0.233 | 0.688 | 0.849 | 0.910 |
| GO_PHOTORECEPTOR_INNER_SEGMENT                                                            | 35  | 0.206 | 0.687 | 0.857 | 0.911 |
| GO_LIPID_DIGESTION                                                                        | 21  | 0.231 | 0.687 | 0.897 | 0.911 |
| GO_REGULATION_OF_CELLULAR_PH                                                              | 73  | 0.169 | 0.686 | 0.945 | 0.911 |
| GO_PHOSPHATIDYLINOSITOL_PHOSPHATE_PHOSPHATASE_ACTIVITY                                    | 29  | 0.215 | 0.686 | 0.831 | 0.911 |
| GO_ANKYRIN_BINDING                                                                        | 20  | 0.227 | 0.683 | 0.884 | 0.913 |
| GO_COFACTOR_CATABOLIC_PROCESS                                                             | 20  | 0.234 | 0.681 | 0.885 | 0.916 |
| GO_PHOSPHOLIPID_CATABOLIC_PROCESS                                                         | 29  | 0.200 | 0.679 | 0.928 | 0.917 |
| GO_PROTEIN_LIPID_COMPLEX                                                                  | 38  | 0.249 | 0.678 | 0.848 | 0.918 |

---

|                                                                                                                            |     |       |       |       |       |
|----------------------------------------------------------------------------------------------------------------------------|-----|-------|-------|-------|-------|
| GO_NEGATIVE_REGULATION_OF_T_CELL_PROLIFERATION                                                                             | 48  | 0.197 | 0.678 | 0.859 | 0.918 |
| GO_AXIS_SPECIFICATION                                                                                                      | 89  | 0.169 | 0.675 | 0.947 | 0.921 |
| GO_ORGANIC_HYDROXY_COMPOUND_TRANSMEMBRANE_TRANSPORTER_ACTIVITY                                                             | 59  | 0.179 | 0.674 | 0.943 | 0.921 |
| GO_POSITIVE_REGULATION_OF_PROTEIN_TYROSINE_KINASE_ACTIVITY                                                                 | 36  | 0.191 | 0.674 | 0.940 | 0.921 |
| GO_GLYCEROLIPID_CATABOLIC_PROCESS                                                                                          | 36  | 0.219 | 0.674 | 0.882 | 0.921 |
| GO_LYMPHOCYTE_APOPTOTIC_PROCESS                                                                                            | 18  | 0.238 | 0.674 | 0.853 | 0.920 |
| GO_INTERMEDIATE_FILAMENT_CYTOSKELETON                                                                                      | 174 | 0.190 | 0.674 | 0.904 | 0.920 |
| GO_PROTEIN_DEGLYCOSYLATION                                                                                                 | 21  | 0.238 | 0.673 | 0.839 | 0.920 |
| GO_INOSITOL_PHOSPHATE_PHOSPHATASE_ACTIVITY                                                                                 | 20  | 0.217 | 0.673 | 0.901 | 0.920 |
| GO_DIGESTION                                                                                                               | 126 | 0.186 | 0.673 | 0.942 | 0.920 |
| GO_OLFACTORY_RECEPTOR_ACTIVITY                                                                                             | 102 | 0.274 | 0.672 | 0.739 | 0.921 |
| GO_AUDITORY_RECEPTOR_CELL_DIFFERENTIATION                                                                                  | 28  | 0.195 | 0.670 | 0.909 | 0.922 |
| GO_ACTIVE_ION_TRANSMEMBRANE_TRANSPORTER_ACTIVITY                                                                           | 170 | 0.155 | 0.670 | 0.976 | 0.922 |
| GO_ISOPRENOID_METABOLIC_PROCESS                                                                                            | 122 | 0.171 | 0.668 | 0.949 | 0.923 |
| GO_NEGATIVE_REGULATION_OF_POTASSIUM_ION_TRANSMEMBRANE_TRANSPORTER_ACTIVITY                                                 | 15  | 0.244 | 0.668 | 0.871 | 0.923 |
| GO_CALCIIUM_INDEPENDENT_CELL_CELL_ADHESION_VIA_PLASMA_MEMBRANE_CELL_ADHESION_MOLECULES                                     | 20  | 0.224 | 0.668 | 0.909 | 0.923 |
| GO_INSULIN_RECEPTOR_SIGNALING_PATHWAY                                                                                      | 77  | 0.162 | 0.667 | 0.952 | 0.924 |
| GO_POSITIVE_REGULATION_OF_TRANSCRIPTION_FROM_RNA_POLYMERASE_II_PROMOTER_INVOLVED_IN_CELLULAR_RESPONSE_TO_CHEMICAL_STIMULUS | 25  | 0.214 | 0.666 | 0.869 | 0.924 |
| GO_ENTRAINMENT_OF_CIRCADIAN_CLOCK                                                                                          | 25  | 0.201 | 0.664 | 0.897 | 0.926 |
| GO_MODIFIED_AMINO_ACID_TRANSPORT                                                                                           | 26  | 0.197 | 0.660 | 0.902 | 0.929 |
| GO_MONOVALENT_INORGANIC_ANION                                                                                              | 19  | 0.219 | 0.660 | 0.916 | 0.929 |

---

|                                                           |     |       |       |       |       |
|-----------------------------------------------------------|-----|-------|-------|-------|-------|
| N_HOMEOSTASIS                                             |     |       |       |       |       |
| GO_CILIARY_TRANSITION_ZONE                                | 23  | 0.221 | 0.658 | 0.854 | 0.931 |
| GO_RESPONSE_TO_ZINC_ION                                   | 55  | 0.180 | 0.657 | 0.942 | 0.931 |
| GO_CHLORIDE_CHANNEL_REGULATOR_ACTIVITY                    | 16  | 0.218 | 0.656 | 0.909 | 0.931 |
| GO_ACROSOMAL_VESICLE                                      | 82  | 0.157 | 0.650 | 0.968 | 0.936 |
| GO_ESTROGEN_METABOLIC_PROCESS                             | 23  | 0.212 | 0.647 | 0.942 | 0.939 |
| GO_NEGATIVE_REGULATION_OF_FIBROBLAST_PROLIFERATION        | 27  | 0.199 | 0.646 | 0.925 | 0.939 |
| GO_NONMOTILE_PRIMARY_CILIUM_ASSEMBLY                      | 22  | 0.213 | 0.642 | 0.881 | 0.942 |
| GO_INTERMEDIATE_FILAMENT                                  | 134 | 0.202 | 0.642 | 0.911 | 0.942 |
| GO_GRANULOCYTE_ACTIVATION                                 | 19  | 0.229 | 0.640 | 0.882 | 0.944 |
| GO_ANION_TRANSMEMBRANE_TRANSPORT                          | 245 | 0.143 | 0.633 | 0.994 | 0.949 |
| GO_REGULATION_OF_HAIR_CYCLE                               | 22  | 0.196 | 0.629 | 0.941 | 0.951 |
| GO_REGULATION_OF_PROTEIN_SUMOYLATION                      | 21  | 0.203 | 0.628 | 0.930 | 0.952 |
| GO_REGULATION_OF_WATER_LOSS_VIA_SKIN                      | 18  | 0.281 | 0.628 | 0.838 | 0.952 |
| GO_PRE_AUTOPHAGOSOMAL_STRUCTURE                           | 28  | 0.199 | 0.625 | 0.913 | 0.954 |
| GO_SECONDARY_ACTIVE_TRANSMEMBRANE_TRANSPORTER_ACTIVITY    | 226 | 0.143 | 0.624 | 0.992 | 0.954 |
| GO_SYMPORTER_ACTIVITY                                     | 141 | 0.151 | 0.624 | 0.983 | 0.954 |
| GO_LIPID_HOMEOSTASIS                                      | 104 | 0.167 | 0.623 | 0.954 | 0.954 |
| GO_MODIFIED_AMINO_ACID_TRANSMEMBRANE_TRANSPORTER_ACTIVITY | 16  | 0.211 | 0.622 | 0.931 | 0.954 |
| GO_ORGANIC_ACID_TRANSMEMBRANE_TRANSPORTER_ACTIVITY        | 137 | 0.148 | 0.619 | 0.983 | 0.956 |
| GO_NEGATIVE_REGULATION_OF_B_CELL_PROLIFERATION            | 15  | 0.230 | 0.618 | 0.931 | 0.956 |
| GO_POSITIVE_REGULATION_OF_ERBB_SIGNALING_PATHWAY          | 34  | 0.175 | 0.616 | 0.973 | 0.958 |
| GO_ALDEHYDE_DEHYDROGENASE_NAD_ACTIVITY                    | 19  | 0.211 | 0.615 | 0.912 | 0.958 |
| GO_ORGANIC_HYDROXY_COMPOUND_CATABOLIC_PROCESS             | 71  | 0.159 | 0.615 | 0.984 | 0.958 |
| GO_ASPARTIC_TYPE_PEPTIDASE_ACTIVITY                       | 24  | 0.210 | 0.614 | 0.967 | 0.958 |
| GO_POSITIVE_REGULATION_OF_T_CELL_MEDIATED_IMMUNITY        | 31  | 0.198 | 0.614 | 0.932 | 0.958 |
| GO_REVERSE_CHOLESTEROL_TRANSPORT                          | 17  | 0.286 | 0.612 | 0.888 | 0.958 |

|                                                         |     |       |       |       |       |
|---------------------------------------------------------|-----|-------|-------|-------|-------|
| GO_RESPONSE_TO_LITHIUM_ION                              | 27  | 0.190 | 0.610 | 0.960 | 0.959 |
| GO_NOTCH_RECEPTOR_PROCESSING                            | 16  | 0.219 | 0.608 | 0.924 | 0.961 |
| GO_PHOSPHATIDIC_ACID_METABOLIC_PROCESS                  | 31  | 0.174 | 0.607 | 0.980 | 0.961 |
| GO_SKELETAL_MUSCLE_CONTRACTION                          | 31  | 0.179 | 0.607 | 0.966 | 0.961 |
| GO_LEUKOCYTE_APOPTOTIC_PROCESS                          | 22  | 0.205 | 0.605 | 0.937 | 0.962 |
| GO_PHOSPHATIDYLCHOLINE_BIOSYNTHETIC_PROCESS             | 26  | 0.192 | 0.602 | 0.975 | 0.963 |
| GO_PHOTOTRANSDUCTION_VISIBLE_LIGHT                      | 20  | 0.223 | 0.601 | 0.892 | 0.963 |
| GO_ANTIMICROBIAL_HUMORAL_RESPONSE                       | 45  | 0.189 | 0.597 | 0.986 | 0.965 |
| GO_POSITIVE_REGULATION_OF_MONOOXYGENASE_ACTIVITY        | 27  | 0.189 | 0.596 | 0.971 | 0.966 |
| GO_ANDROGEN_METABOLIC_PROCESS                           | 30  | 0.178 | 0.594 | 0.974 | 0.966 |
| GO_ACYLGLYCEROL_HOMEOSTASIS                             | 27  | 0.213 | 0.593 | 0.927 | 0.967 |
| GO_ASYMMETRIC_PROTEIN_LOCALIZATION                      | 18  | 0.209 | 0.592 | 0.926 | 0.967 |
| GO_REGULATION_OF_TOLL_LIKE_RECEPTOR_4_SIGNALING_PATHWAY | 17  | 0.197 | 0.591 | 0.956 | 0.967 |
| GO_GLUCURONOSYLTRANSFERASE_ACTIVITY                     | 31  | 0.190 | 0.588 | 0.956 | 0.968 |
| GO_NECROPTOTIC_PROCESS                                  | 21  | 0.209 | 0.588 | 0.926 | 0.968 |
| GO_BICARBONATE_TRANSPORT                                | 44  | 0.168 | 0.588 | 0.980 | 0.968 |
| GO_NEUROTRANSMITTER_SODIUM_SYMPORTER_ACTIVITY           | 19  | 0.196 | 0.572 | 0.957 | 0.976 |
| GO_RESPONSE_TO_INTERFERON_GAMMA                         | 139 | 0.173 | 0.562 | 0.891 | 0.980 |
| GO_TRIGLYCERIDE_LIPASE_ACTIVITY                         | 19  | 0.190 | 0.561 | 0.966 | 0.980 |
| GO_FAT_SOLUBLE_VITAMIN_METABOLIC_PROCESS                | 31  | 0.168 | 0.556 | 0.988 | 0.982 |
| GO_RETINA_HOMEOSTASIS                                   | 62  | 0.149 | 0.556 | 0.992 | 0.981 |
| GO_PHOSPHATIDYLSERINE_ACYLCHAIN_REMODELING              | 17  | 0.191 | 0.554 | 0.981 | 0.982 |
| GO_CORNIFIED_ENVELOPE                                   | 32  | 0.285 | 0.553 | 0.879 | 0.982 |
| GO_POSITIVE_REGULATION_OF_LYMPHOCYTE_APOPTOTIC_PROCESS  | 18  | 0.202 | 0.550 | 0.965 | 0.983 |
| GO_STEROL_TRANSPORTER_ACTIVITY                          | 17  | 0.216 | 0.544 | 0.954 | 0.984 |
| GO_PROTEIN_TRANSPORT_ALONG_MICROTUBULE                  | 26  | 0.179 | 0.544 | 0.955 | 0.984 |
| GO_CATION_AMINO_ACID_SYMPORTER                          | 16  | 0.193 | 0.536 | 0.971 | 0.987 |

---

|                                 |     |       |       |       |       |
|---------------------------------|-----|-------|-------|-------|-------|
| R_ACTIVITY                      |     |       |       |       |       |
| GO_REGULATION_OF_MICROTUBULE_   |     |       |       |       |       |
| BASED_MOVEMENT                  | 17  | 0.184 | 0.533 | 0.981 | 0.987 |
| GO_ANION_CATION_SYMPORTER_ACT   |     |       |       |       |       |
| IVITY                           | 53  | 0.148 | 0.533 | 0.992 | 0.987 |
| GO_REGULATION_OF_TRIGLYCERIDE_  |     |       |       |       |       |
| BIOSYNTHETIC_PROCESS            | 17  | 0.186 | 0.531 | 0.990 | 0.987 |
| GO_ORGANIC_ACID_SODIUM_SYMPOR   |     |       |       |       |       |
| TER_ACTIVITY                    | 30  | 0.159 | 0.528 | 0.985 | 0.988 |
| GO_INTERFERON_GAMMA_MEDIATED    |     |       |       |       |       |
| _SIGNALING_PATHWAY              | 67  | 0.189 | 0.526 | 0.872 | 0.988 |
| GO_REGULATION_OF_EPIDERMAL_GR   |     |       |       |       |       |
| OWTH_FACTOR_ACTIVATED_RECEPTO   |     |       |       |       |       |
| R_ACTIVITY                      | 22  | 0.168 | 0.524 | 0.986 | 0.988 |
| GO_MHC_PROTEIN_COMPLEX          | 24  | 0.233 | 0.516 | 0.834 | 0.990 |
| GO_EPIDERMAL_CELL_DIFFERENTIATI |     |       |       |       |       |
| ON                              | 126 | 0.160 | 0.515 | 0.957 | 0.990 |
| GO_GABA_RECEPTOR_COMPLEX        | 18  | 0.187 | 0.511 | 0.960 | 0.991 |
| GO_PROTEIN_LIPID_COMPLEX_SUBUN  |     |       |       |       |       |
| IT_ORGANIZATION                 | 36  | 0.189 | 0.509 | 0.965 | 0.991 |
| GO_SULFUR_COMPOUND_TRANSMEM     |     |       |       |       |       |
| BRANE_TRANSPORTER_ACTIVITY      | 27  | 0.155 | 0.503 | 0.986 | 0.992 |
| GO_ORGANIC_ANION_TRANSMEMBRA    |     |       |       |       |       |
| NE_TRANSPORTER_ACTIVITY         | 172 | 0.117 | 0.503 | 0.998 | 0.991 |
| GO_K63_LINKED_POLYUBIQUITIN_BIN |     |       |       |       |       |
| DING                            | 17  | 0.175 | 0.498 | 0.981 | 0.992 |
| GO_CILIUM_MOVEMENT              | 30  | 0.175 | 0.495 | 0.952 | 0.992 |
| GO_SOLUTE_SODIUM_SYMPORTER_AC   |     |       |       |       |       |
| TIVITY                          | 51  | 0.134 | 0.491 | 0.998 | 0.993 |
| GO_NEUTROPHIL_MEDIATED_IMMUNI   |     |       |       |       |       |
| TY                              | 21  | 0.177 | 0.485 | 0.996 | 0.994 |
| GO_CARBOHYDRATE_TRANSMEMBRA     |     |       |       |       |       |
| NE_TRANSPORT                    | 24  | 0.152 | 0.478 | 0.992 | 0.995 |
| GO_CYSTEINE_TYPE_ENDOPEPTIDASE  |     |       |       |       |       |
| _INHIBITOR_ACTIVITY             | 55  | 0.133 | 0.471 | 1.000 | 0.995 |
| GO_REGULATION_OF_TRIGLYCERIDE_  |     |       |       |       |       |
| METABOLIC_PROCESS               | 33  | 0.143 | 0.450 | 0.998 | 0.998 |
| GO_ANTIGEN_PROCESSING_AND_PRES  |     |       |       |       |       |
| ENTATION_OF_ENDOGENOUS_ANTIGE   |     |       |       |       |       |
| N                               | 17  | 0.178 | 0.444 | 0.985 | 0.998 |
| GO_ALDO_KETO_REDUCTASE_NADP_    |     |       |       |       |       |
| ACTIVITY                        | 25  | 0.157 | 0.439 | 0.990 | 0.998 |
| GO_NEUTRAL_LIPID_CATABOLIC_PRO  |     |       |       |       |       |
| CESS                            | 25  | 0.164 | 0.431 | 0.994 | 0.998 |

---

|                                                       |    |       |       |       |       |
|-------------------------------------------------------|----|-------|-------|-------|-------|
| GO_BICARBONATE_TRANSMEMBRANE<br>_TRANSPORTER_ACTIVITY | 19 | 0.147 | 0.429 | 0.998 | 0.998 |
| GO_MACROMOLECULAR_COMPLEX_R<br>EMODELING              | 24 | 0.182 | 0.415 | 0.990 | 0.999 |
| GO_PROTEIN_LIPID_COMPLEX_ASSEM<br>BLY                 | 21 | 0.171 | 0.407 | 0.990 | 0.999 |
| GO_LAMELLAR_BODY                                      | 20 | 0.137 | 0.378 | 1.000 | 1.000 |
| GO_KERATINOCYTE_DIFFERENTIATIO<br>N                   | 86 | 0.131 | 0.358 | 0.998 | 1.000 |
| GO_TRIGLYCERIDE_RICH_LIPOPROTEI<br>N_PARTICLE         | 18 | 0.143 | 0.294 | 1.000 | 1.000 |

---

ES, enrichment score; NES, normalized enrichment score; NOM, nominal; FDR, false discovery rate.

Table SIII. The co-expressed genes of GSTM5 in gastric cancer tumor tissue in The Cancer Genome

Atlas cohort. GSTM5, glutathione S-transferase Mu 5.

| Gene1 | Gene2      | Cor   | P-value |
|-------|------------|-------|---------|
| GSTM5 | CYP1B1     | 0.600 | 0.006   |
| GSTM5 | SELP       | 0.600 | 0.006   |
| GSTM5 | TLN1       | 0.600 | 0.006   |
| GSTM5 | DOK6       | 0.600 | 0.006   |
| GSTM5 | DCLK2      | 0.600 | 0.006   |
| GSTM5 | ERG        | 0.600 | 0.006   |
| GSTM5 | SPEG       | 0.601 | 0.006   |
| GSTM5 | KLF9       | 0.601 | 0.006   |
| GSTM5 | FOXN3      | 0.601 | 0.006   |
| GSTM5 | AC092042.3 | 0.601 | 0.006   |
| GSTM5 | HTR2A      | 0.601 | 0.006   |
| GSTM5 | CLEC14A    | 0.601 | 0.006   |
| GSTM5 | TRPC1      | 0.602 | 0.006   |
| GSTM5 | ABCA8      | 0.602 | 0.006   |
| GSTM5 | PLN        | 0.603 | 0.006   |
| GSTM5 | FRRS1L     | 0.604 | 0.006   |
| GSTM5 | AR         | 0.604 | 0.006   |
| GSTM5 | PRIMA1     | 0.604 | 0.006   |
| GSTM5 | METTL24    | 0.604 | 0.006   |
| GSTM5 | ARMCX1     | 0.604 | 0.006   |
| GSTM5 | CPED1      | 0.605 | 0.005   |
| GSTM5 | PDE5A      | 0.605 | 0.005   |
| GSTM5 | CXorf36    | 0.605 | 0.005   |
| GSTM5 | JAZF1      | 0.605 | 0.005   |
| GSTM5 | CYYR1      | 0.606 | 0.005   |
| GSTM5 | LURAP1     | 0.607 | 0.005   |
| GSTM5 | ELN        | 0.607 | 0.005   |
| GSTM5 | ILK        | 0.607 | 0.005   |
| GSTM5 | OLFML1     | 0.607 | 0.005   |
| GSTM5 | PPP1R12C   | 0.607 | 0.005   |
| GSTM5 | CBX6       | 0.607 | 0.005   |
| GSTM5 | FEZ1       | 0.608 | 0.005   |
| GSTM5 | HSPB6      | 0.608 | 0.005   |
| GSTM5 | FERMT2     | 0.608 | 0.005   |
| GSTM5 | NFIC       | 0.608 | 0.005   |
| GSTM5 | COL19A1    | 0.609 | 0.005   |
| GSTM5 | NFIA       | 0.609 | 0.005   |
| GSTM5 | IFFO1      | 0.609 | 0.005   |
| GSTM5 | MAGI2      | 0.609 | 0.005   |
| GSTM5 | MEOX2      | 0.610 | 0.005   |



---

|       |          |       |       |
|-------|----------|-------|-------|
| GSTM5 | MSRB3    | 0.610 | 0.005 |
| GSTM5 | WWTR1    | 0.610 | 0.005 |
| GSTM5 | EHD2     | 0.610 | 0.005 |
| GSTM5 | MOB2     | 0.611 | 0.005 |
| GSTM5 | SLC2A4   | 0.611 | 0.005 |
| GSTM5 | PBX3     | 0.611 | 0.005 |
| GSTM5 | FAM13C   | 0.611 | 0.005 |
| GSTM5 | PLIN4    | 0.611 | 0.005 |
| GSTM5 | PTGDS    | 0.612 | 0.005 |
| GSTM5 | SVEP1    | 0.612 | 0.005 |
| GSTM5 | LAYN     | 0.612 | 0.005 |
| GSTM5 | PIP5K1C  | 0.612 | 0.005 |
| GSTM5 | ZEB1     | 0.613 | 0.005 |
| GSTM5 | KLHL41   | 0.613 | 0.005 |
| GSTM5 | KCNA5    | 0.613 | 0.005 |
| GSTM5 | ITGA7    | 0.613 | 0.005 |
| GSTM5 | ZNF454   | 0.613 | 0.005 |
| GSTM5 | BEND6    | 0.613 | 0.005 |
| GSTM5 | TPM2     | 0.614 | 0.005 |
| GSTM5 | ANGPTL1  | 0.614 | 0.005 |
| GSTM5 | PLSCR4   | 0.614 | 0.005 |
| GSTM5 | TXNIP    | 0.614 | 0.005 |
| GSTM5 | DIRC3    | 0.614 | 0.005 |
| GSTM5 | CMYA5    | 0.614 | 0.005 |
| GSTM5 | CAND2    | 0.615 | 0.005 |
| GSTM5 | SERPINF1 | 0.615 | 0.005 |
| GSTM5 | ZFPM2    | 0.615 | 0.005 |
| GSTM5 | SERPING1 | 0.617 | 0.005 |
| GSTM5 | GPRASP2  | 0.617 | 0.005 |
| GSTM5 | SYNPO    | 0.617 | 0.005 |
| GSTM5 | FGF7     | 0.618 | 0.005 |
| GSTM5 | GRIK5    | 0.618 | 0.005 |
| GSTM5 | EPM2A    | 0.618 | 0.005 |
| GSTM5 | HACD4    | 0.618 | 0.005 |
| GSTM5 | ANXA6    | 0.618 | 0.005 |
| GSTM5 | CALCOCO1 | 0.618 | 0.005 |
| GSTM5 | FLNA     | 0.618 | 0.005 |
| GSTM5 | LTBP1    | 0.618 | 0.005 |
| GSTM5 | ADH1B    | 0.619 | 0.004 |
| GSTM5 | FAM212B  | 0.620 | 0.004 |
| GSTM5 | SCRG1    | 0.620 | 0.004 |
| GSTM5 | PDZRN3   | 0.620 | 0.004 |
| GSTM5 | PDLIM7   | 0.620 | 0.004 |
| GSTM5 | LIX1L    | 0.620 | 0.004 |

---

---

|       |          |       |       |
|-------|----------|-------|-------|
| GSTM5 | CMTM5    | 0.620 | 0.004 |
| GSTM5 | PRR34    | 0.621 | 0.004 |
| GSTM5 | RHOB     | 0.621 | 0.004 |
| GSTM5 | PTGFR    | 0.622 | 0.004 |
| GSTM5 | MAP1B    | 0.622 | 0.004 |
| GSTM5 | FAT3     | 0.622 | 0.004 |
| GSTM5 | C1S      | 0.623 | 0.004 |
| GSTM5 | SMTN     | 0.623 | 0.004 |
| GSTM5 | IL17B    | 0.623 | 0.004 |
| GSTM5 | PRDM6    | 0.624 | 0.004 |
| GSTM5 | ADHFE1   | 0.624 | 0.004 |
| GSTM5 | PARVA    | 0.624 | 0.004 |
| GSTM5 | PKD2     | 0.625 | 0.004 |
| GSTM5 | GHR      | 0.625 | 0.004 |
| GSTM5 | SLC9A9   | 0.626 | 0.004 |
| GSTM5 | PTGIS    | 0.626 | 0.004 |
| GSTM5 | PGM5     | 0.627 | 0.004 |
| GSTM5 | CADM3    | 0.628 | 0.004 |
| GSTM5 | APBB1    | 0.628 | 0.004 |
| GSTM5 | ZNF385D  | 0.628 | 0.004 |
| GSTM5 | RBPM5    | 0.628 | 0.004 |
| GSTM5 | FBLN1    | 0.628 | 0.004 |
| GSTM5 | COLEC12  | 0.629 | 0.004 |
| GSTM5 | CPEB1    | 0.629 | 0.004 |
| GSTM5 | TCEAL3   | 0.629 | 0.004 |
| GSTM5 | PDZRN4   | 0.630 | 0.004 |
| GSTM5 | ZNF835   | 0.630 | 0.004 |
| GSTM5 | OLFML3   | 0.631 | 0.004 |
| GSTM5 | C16orf45 | 0.631 | 0.004 |
| GSTM5 | MPDZ     | 0.631 | 0.004 |
| GSTM5 | FAM229B  | 0.632 | 0.004 |
| GSTM5 | PRICKLE2 | 0.633 | 0.004 |
| GSTM5 | MMRN2    | 0.634 | 0.004 |
| GSTM5 | NXPH3    | 0.634 | 0.004 |
| GSTM5 | GUCY1A3  | 0.635 | 0.004 |
| GSTM5 | CHRM2    | 0.635 | 0.004 |
| GSTM5 | COL14A1  | 0.635 | 0.004 |
| GSTM5 | S1PR1    | 0.636 | 0.003 |
| GSTM5 | CSRP1    | 0.636 | 0.003 |
| GSTM5 | RNF180   | 0.636 | 0.003 |
| GSTM5 | CCL14    | 0.637 | 0.003 |
| GSTM5 | JPH2     | 0.637 | 0.003 |
| GSTM5 | NEGR1    | 0.638 | 0.003 |
| GSTM5 | CASQ2    | 0.638 | 0.003 |

---

---

|       |          |       |       |
|-------|----------|-------|-------|
| GSTM5 | MAP1A    | 0.639 | 0.003 |
| GSTM5 | RHOJ     | 0.639 | 0.003 |
| GSTM5 | EVC      | 0.639 | 0.003 |
| GSTM5 | IGFBP7   | 0.640 | 0.003 |
| GSTM5 | PLAC9    | 0.640 | 0.003 |
| GSTM5 | GNG11    | 0.641 | 0.003 |
| GSTM5 | SYNC     | 0.641 | 0.003 |
| GSTM5 | ZNF135   | 0.642 | 0.003 |
| GSTM5 | KCNMA1   | 0.642 | 0.003 |
| GSTM5 | FAM129A  | 0.643 | 0.003 |
| GSTM5 | LMO3     | 0.643 | 0.003 |
| GSTM5 | NLGN2    | 0.643 | 0.003 |
| GSTM5 | 4-Sep    | 0.644 | 0.003 |
| GSTM5 | ITPR1    | 0.644 | 0.003 |
| GSTM5 | RERG     | 0.645 | 0.003 |
| GSTM5 | KIAA0408 | 0.645 | 0.003 |
| GSTM5 | OGN      | 0.646 | 0.003 |
| GSTM5 | ABI3BP   | 0.646 | 0.003 |
| GSTM5 | EDNRA    | 0.646 | 0.003 |
| GSTM5 | SLIT2    | 0.647 | 0.003 |
| GSTM5 | PDZD4    | 0.647 | 0.003 |
| GSTM5 | SPARCL1  | 0.647 | 0.003 |
| GSTM5 | ATP1A2   | 0.647 | 0.003 |
| GSTM5 | GUCY1B3  | 0.648 | 0.003 |
| GSTM5 | MCAM     | 0.648 | 0.003 |
| GSTM5 | PDE1A    | 0.648 | 0.003 |
| GSTM5 | CCDC69   | 0.648 | 0.003 |
| GSTM5 | ADAMTSL3 | 0.649 | 0.003 |
| GSTM5 | PLPP7    | 0.649 | 0.003 |
| GSTM5 | CRISPLD2 | 0.649 | 0.003 |
| GSTM5 | C11orf96 | 0.650 | 0.003 |
| GSTM5 | PLPP1    | 0.651 | 0.003 |
| GSTM5 | ASB2     | 0.651 | 0.003 |
| GSTM5 | ITGA9    | 0.652 | 0.003 |
| GSTM5 | LRCH2    | 0.652 | 0.003 |
| GSTM5 | FAM110D  | 0.653 | 0.003 |
| GSTM5 | PRELP    | 0.653 | 0.003 |
| GSTM5 | TCF21    | 0.653 | 0.003 |
| GSTM5 | NCS1     | 0.653 | 0.003 |
| GSTM5 | FRZB     | 0.654 | 0.003 |
| GSTM5 | BNC2     | 0.654 | 0.003 |
| GSTM5 | DMPK     | 0.655 | 0.003 |
| GSTM5 | C1QTNF4  | 0.655 | 0.003 |
| GSTM5 | HOXA4    | 0.656 | 0.003 |

---

---

|       |         |       |       |
|-------|---------|-------|-------|
| GSTM5 | SLIT3   | 0.656 | 0.003 |
| GSTM5 | TACR2   | 0.656 | 0.003 |
| GSTM5 | SH3BGRL | 0.657 | 0.003 |
| GSTM5 | SYDE1   | 0.658 | 0.003 |
| GSTM5 | FAM198A | 0.658 | 0.003 |
| GSTM5 | MAP3K3  | 0.659 | 0.002 |
| GSTM5 | STON1   | 0.659 | 0.002 |
| GSTM5 | RBPMS2  | 0.659 | 0.002 |
| GSTM5 | EML1    | 0.659 | 0.002 |
| GSTM5 | HSPB8   | 0.659 | 0.002 |
| GSTM5 | NPR2    | 0.660 | 0.002 |
| GSTM5 | RAMP3   | 0.660 | 0.002 |
| GSTM5 | TMEM240 | 0.660 | 0.002 |
| GSTM5 | DMGDH   | 0.662 | 0.002 |
| GSTM5 | LMOD1   | 0.662 | 0.002 |
| GSTM5 | KCNMB1  | 0.663 | 0.002 |
| GSTM5 | MEIS1   | 0.663 | 0.002 |
| GSTM5 | C3orf18 | 0.663 | 0.002 |
| GSTM5 | NPR1    | 0.663 | 0.002 |
| GSTM5 | DNAJC18 | 0.663 | 0.002 |
| GSTM5 | ADAM33  | 0.664 | 0.002 |
| GSTM5 | CYSLTR1 | 0.664 | 0.002 |
| GSTM5 | PRKN    | 0.664 | 0.002 |
| GSTM5 | MYOC    | 0.665 | 0.002 |
| GSTM5 | ROR2    | 0.665 | 0.002 |
| GSTM5 | ATP8B2  | 0.665 | 0.002 |
| GSTM5 | ABCC9   | 0.668 | 0.002 |
| GSTM5 | SFRP1   | 0.669 | 0.002 |
| GSTM5 | DCN     | 0.669 | 0.002 |
| GSTM5 | KCNE4   | 0.669 | 0.002 |
| GSTM5 | SELENOM | 0.669 | 0.002 |
| GSTM5 | MYL9    | 0.670 | 0.002 |
| GSTM5 | PLEKHO1 | 0.670 | 0.002 |
| GSTM5 | SETBP1  | 0.671 | 0.002 |
| GSTM5 | EFEMP2  | 0.671 | 0.002 |
| GSTM5 | ST3GAL3 | 0.672 | 0.002 |
| GSTM5 | A2M     | 0.672 | 0.002 |
| GSTM5 | ATP1B2  | 0.673 | 0.002 |
| GSTM5 | COL8A2  | 0.673 | 0.002 |
| GSTM5 | GNAO1   | 0.674 | 0.002 |
| GSTM5 | LGI4    | 0.674 | 0.002 |
| GSTM5 | TMEM35A | 0.674 | 0.002 |
| GSTM5 | RGMA    | 0.675 | 0.002 |
| GSTM5 | MAN1C1  | 0.676 | 0.002 |

---

---

|       |          |       |       |
|-------|----------|-------|-------|
| GSTM5 | LHFP     | 0.676 | 0.002 |
| GSTM5 | RSPO1    | 0.676 | 0.002 |
| GSTM5 | NACAD    | 0.676 | 0.002 |
| GSTM5 | RNF150   | 0.677 | 0.002 |
| GSTM5 | CC2D2A   | 0.679 | 0.002 |
| GSTM5 | CPXM2    | 0.679 | 0.002 |
| GSTM5 | FHL1     | 0.680 | 0.002 |
| GSTM5 | TNS1     | 0.680 | 0.002 |
| GSTM5 | TMOD1    | 0.680 | 0.002 |
| GSTM5 | NFATC4   | 0.681 | 0.002 |
| GSTM5 | WFDC1    | 0.682 | 0.002 |
| GSTM5 | EMILIN1  | 0.682 | 0.002 |
| GSTM5 | PDLIM3   | 0.683 | 0.002 |
| GSTM5 | SSBP2    | 0.685 | 0.002 |
| GSTM5 | VSTM4    | 0.685 | 0.002 |
| GSTM5 | LCN6     | 0.686 | 0.002 |
| GSTM5 | RBMS3    | 0.686 | 0.002 |
| GSTM5 | MRVI1    | 0.686 | 0.002 |
| GSTM5 | PPP1R14A | 0.687 | 0.002 |
| GSTM5 | CRYAB    | 0.688 | 0.002 |
| GSTM5 | TAGLN    | 0.688 | 0.002 |
| GSTM5 | GPRASP1  | 0.688 | 0.002 |
| GSTM5 | RECK     | 0.688 | 0.002 |
| GSTM5 | ACTA2    | 0.688 | 0.002 |
| GSTM5 | KANK2    | 0.688 | 0.002 |
| GSTM5 | PABPC5   | 0.691 | 0.002 |
| GSTM5 | BEND5    | 0.691 | 0.002 |
| GSTM5 | ARHGAP20 | 0.691 | 0.002 |
| GSTM5 | RCAN2    | 0.693 | 0.001 |
| GSTM5 | TTC28    | 0.694 | 0.001 |
| GSTM5 | RAI2     | 0.694 | 0.001 |
| GSTM5 | C1R      | 0.694 | 0.001 |
| GSTM5 | FBLN5    | 0.696 | 0.001 |
| GSTM5 | CHRDL1   | 0.696 | 0.001 |
| GSTM5 | PDE2A    | 0.697 | 0.001 |
| GSTM5 | RSPO3    | 0.697 | 0.001 |
| GSTM5 | PKIG     | 0.698 | 0.001 |
| GSTM5 | CCDC80   | 0.698 | 0.001 |
| GSTM5 | NMUR1    | 0.699 | 0.001 |
| GSTM5 | FAXDC2   | 0.699 | 0.001 |
| GSTM5 | SSC5D    | 0.701 | 0.001 |
| GSTM5 | SMOC2    | 0.702 | 0.001 |
| GSTM5 | ANGPTL7  | 0.703 | 0.001 |
| GSTM5 | P2RY14   | 0.703 | 0.001 |

---

---

|       |            |       |       |
|-------|------------|-------|-------|
| GSTM5 | ZBTB4      | 0.703 | 0.001 |
| GSTM5 | TGFB1I1    | 0.703 | 0.001 |
| GSTM5 | MAP6       | 0.704 | 0.001 |
| GSTM5 | PYGM       | 0.704 | 0.001 |
| GSTM5 | MRGPRF     | 0.705 | 0.001 |
| GSTM5 | MFAP4      | 0.705 | 0.001 |
| GSTM5 | SOD3       | 0.706 | 0.001 |
| GSTM5 | SPON1      | 0.706 | 0.001 |
| GSTM5 | CLIP3      | 0.707 | 0.001 |
| GSTM5 | POU6F1     | 0.708 | 0.001 |
| GSTM5 | SCN4B      | 0.709 | 0.001 |
| GSTM5 | NR2F1      | 0.709 | 0.001 |
| GSTM5 | MXRA7      | 0.711 | 0.001 |
| GSTM5 | TMEM47     | 0.711 | 0.001 |
| GSTM5 | DACT3      | 0.711 | 0.001 |
| GSTM5 | ARHGEF25   | 0.712 | 0.001 |
| GSTM5 | BARX1      | 0.713 | 0.001 |
| GSTM5 | NTN1       | 0.714 | 0.001 |
| GSTM5 | LIMS2      | 0.715 | 0.001 |
| GSTM5 | ADARB1     | 0.715 | 0.001 |
| GSTM5 | C1QTNF2    | 0.716 | 0.001 |
| GSTM5 | C14orf132  | 0.716 | 0.001 |
| GSTM5 | ZBTB47     | 0.717 | 0.001 |
| GSTM5 | C2orf40    | 0.718 | 0.001 |
| GSTM5 | CAVIN1     | 0.719 | 0.001 |
| GSTM5 | SGCA       | 0.720 | 0.001 |
| GSTM5 | ADCY5      | 0.720 | 0.001 |
| GSTM5 | FOXF1      | 0.722 | 0.001 |
| GSTM5 | BOC        | 0.722 | 0.001 |
| GSTM5 | SCN2B      | 0.724 | 0.001 |
| GSTM5 | MGP        | 0.724 | 0.001 |
| GSTM5 | LRRN4CL    | 0.725 | 0.001 |
| GSTM5 | SRPX       | 0.726 | 0.001 |
| GSTM5 | PODN       | 0.726 | 0.001 |
| GSTM5 | DAAM2      | 0.728 | 0.001 |
| GSTM5 | NAP1L3     | 0.729 | 0.001 |
| GSTM5 | TNS2       | 0.733 | 0.001 |
| GSTM5 | COPZ2      | 0.733 | 0.001 |
| GSTM5 | CBX7       | 0.736 | 0.001 |
| GSTM5 | JAM3       | 0.738 | 0.001 |
| GSTM5 | FBXL7      | 0.739 | 0.001 |
| GSTM5 | TCEAL7     | 0.741 | 0.001 |
| GSTM5 | ST6GALNAC6 | 0.748 | 0.001 |
| GSTM5 | HSPB2      | 0.749 | 0.001 |

---

---

|       |         |       |        |
|-------|---------|-------|--------|
| GSTM5 | ZCCHC24 | 0.751 | 0.001  |
| GSTM5 | TMEM100 | 0.751 | 0.001  |
| GSTM5 | C1QTNF7 | 0.759 | <0.001 |
| GSTM5 | PKNOX2  | 0.761 | <0.001 |
| GSTM5 | COX7A1  | 0.768 | <0.001 |
| GSTM5 | BHMT2   | 0.768 | <0.001 |
| GSTM5 | JAM2    | 0.768 | <0.001 |
| GSTM5 | FXYD6   | 0.773 | <0.001 |
| GSTM5 | TNFSF12 | 0.773 | <0.001 |
| GSTM5 | INMT    | 0.776 | <0.001 |
| GSTM5 | CNRIP1  | 0.777 | <0.001 |
| GSTM5 | ITIH5   | 0.778 | <0.001 |
| GSTM5 | AOC3    | 0.781 | <0.001 |
| GSTM5 | NDN     | 0.784 | <0.001 |
| GSTM5 | ACKR1   | 0.792 | <0.001 |
| GSTM5 | MAPK10  | 0.794 | <0.001 |
| GSTM5 | GYPC    | 0.821 | <0.001 |
| GSTM5 | FXYD1   | 0.827 | <0.001 |
| GSTM5 | GSTM5   | 1.000 | <0.001 |

---

Table SIV. Gene Ontology term analysis of glutathione S-transferase Mu 5 and its co-expressed genes.

| Category             | Term                                                 | Count | P-value | Genes                                                                                                                                                                                                                                                                                                                                                                                     |
|----------------------|------------------------------------------------------|-------|---------|-------------------------------------------------------------------------------------------------------------------------------------------------------------------------------------------------------------------------------------------------------------------------------------------------------------------------------------------------------------------------------------------|
| GOTERM_CC_<br>DIRECT | GO:0031012~extracel<br>lular matrix                  | 25    | <0.001  | LTBP1, IGFBP7, DCN, ABI3BP,<br>MMRN2, OGN, ILK, COL8A2,<br>MYOC, SPON1, MGP, CPXM2,<br>SOD3, FLNA, EMILIN1, PRELP,<br>FBLN1, COL14A1, SERPINF1,<br>SFRP1, FBLN5, TGFB1I1,<br>MFAP4, SSC5D, CLEC14A<br>FXVD1, TRPC1, ABCC9,                                                                                                                                                                |
| GOTERM_BP_<br>DIRECT | GO:1903779~regulati<br>on of cardiac<br>conduction   | 12    | <0.001  | ATP1B2, PLN, NPR1, NPR2,<br>ATP1A2, FXVD6, CASQ2,<br>ITPR1, DMPK<br>RECK, ELN, CCDC80, DCN,<br>ABI3BP, EMILIN1, ITGA9,<br>SMOC2, FBLN1, COL14A1,<br>COL19A1, CRISPLD2, FOXF1,<br>FBLN5, ITGA7, JAM2, JAM3,<br>COL8A2                                                                                                                                                                      |
| GOTERM_BP_<br>DIRECT | GO:0030198~extracel<br>lular matrix<br>organization  | 18    | <0.001  | LTBP1, PODN, SPARCL1,<br>ADAMTSL3, ELN, MGP, SLIT2,<br>PRELP, SLIT3, EMILIN1, OGN,<br>SMOC2, FBLN1, COL14A1,<br>COL19A1, SFRP1, CRISPLD2,<br>FBLN5, COL8A2, MYOC,<br>SPON1                                                                                                                                                                                                                |
| GOTERM_CC_<br>DIRECT | GO:0005578~proteina<br>ceous extracellular<br>matrix | 21    | <0.001  | SELP, FGF7, CCDC80, SLIT2,<br>SOD3, ABI3BP, SLIT3, PRELP,<br>SMOC2, OGN, RSPO1, SFRP1,<br>CRISPLD2, RSPO3                                                                                                                                                                                                                                                                                 |
| GOTERM_MF_<br>DIRECT | GO:0008201~heparin<br>binding                        | 14    | <0.001  | NXPH3, TLN1, A2M, LTBP1,<br>FGF7, CXORF36, IGFBP7,<br>TNFSF12, OLFML1, OGN,<br>ST3GAL3, RSPO1, RSPO3,<br>ITIH5, LGI4, GHR, SERPING1,<br>SLIT2, FLNA, SLIT3, PRELP,<br>CHRD1, PTGDS, SERPINF1,<br>MFAP4, ELN, C1R, DCN, C1S,<br>C1QTNF7, METTL24,<br>ANGPTL7, IL17B, CRISPLD2,<br>COL8A2, VSTM4, SVEP1,<br>EFEMP2, PTGFR, FRZB, NTN1,<br>SOD3, PLAC9, EMILIN1,<br>FBLN1, COL14A1, COL19A1, |
| GOTERM_CC_<br>DIRECT | GO:0005576~extracel<br>lular region                  | 52    | <0.001  |                                                                                                                                                                                                                                                                                                                                                                                           |



|                      |                                                               |    |        |                                                                                                                                                                                                                                      |
|----------------------|---------------------------------------------------------------|----|--------|--------------------------------------------------------------------------------------------------------------------------------------------------------------------------------------------------------------------------------------|
|                      |                                                               |    |        | CCL14, SFRP1, FAM198A,<br>LCN6, FBLN5                                                                                                                                                                                                |
| GOTERM_BP_<br>DIRECT | GO:0006936~muscle<br>contraction                              | 11 | <0.001 | FXYD1, TLN1, GNAO1, ACTA2,<br>TACR2, CRYAB, LMOD1,<br>TPM2, SGCA, TMOD1, MYL9                                                                                                                                                        |
| GOTERM_CC_<br>DIRECT | GO:0071953~elastic<br>fiber                                   | 4  | <0.001 | FBLN1, FBLN5, ELN, MFAP4<br>SELP, SVEP1, CYP1B1,<br>ATP1B2, MPDZ, IGFBP7,<br>MCAM, EMILIN1, ITGA9,<br>PGM5, SRPX, S1PR1,<br>COL19A1, ITGA7, RHOB,<br>TGFB1I1, MFAP4, BOC,                                                            |
| GOTERM_BP_<br>DIRECT | GO:0007155~cell<br>adhesion                                   | 22 | <0.001 | PARVA, FEZ1, AOC3, SPON1<br>RERG, SFRP1, DACT3, CRYAB,                                                                                                                                                                               |
| GOTERM_BP_<br>DIRECT | GO:0030308~negativ<br>e regulation of cell<br>growth          | 11 | <0.001 | FHL1, NPR1, WFDC1, FRZB,<br>APBB1, SLIT2, SLIT3<br>PGM5, JPH2, CRYAB, SYNC,<br>PDLIM3, KCNA5, CASQ2,                                                                                                                                 |
| GOTERM_CC_<br>DIRECT | GO:0030018~Z disc                                             | 11 | <0.001 | FLNA, SYNPO, PARVA, MYL9<br>COL14A1, LIMS2, COL19A1,                                                                                                                                                                                 |
| GOTERM_BP_<br>DIRECT | GO:0016337~single<br>organismal cell-cell<br>adhesion         | 10 | <0.001 | FOXF1, PIP5K1C, NLGN2,<br>JAM2, COL8A2, NTN1, NEGR1<br>AR, MAGI2, CYP1B1, PODN,<br>ADARB1, NDN, IGFBP7, ZEB1,<br>FRZB, PLPP1, KANK2, SLIT3,<br>RERG, TNS2, SFRP1, SPEG,                                                              |
| GOTERM_BP_<br>DIRECT | GO:0008285~negativ<br>e regulation of cell<br>proliferation   | 19 | <0.001 | PKD2, ROR2, TGFB1I1<br>POU6F1, EVC, SMTN, TAGLN,<br>SPEG, CRYAB, FHL1, ITGA7,<br>SGCA                                                                                                                                                |
| GOTERM_BP_<br>DIRECT | GO:0007517~muscle<br>organ development                        | 9  | <0.001 | FBLN1, COL14A1, COL19A1,<br>EFEMP2, ELN, MGP, COL8A2,<br>PRELP                                                                                                                                                                       |
| GOTERM_MF_<br>DIRECT | GO:0005201~extracel<br>lular matrix structural<br>constituent | 8  | <0.001 | PODN, IGFBP7, DCN,<br>TNFSF12, ABI3BP, MMRN2,<br>OGN, PTGIS, IL17B, C1QTNF4,<br>SCRG1, C1QTNF2, LGI4,<br>ANGPTL1, MYOC, GHR,<br>SPON1, SELP, ACTA2,<br>SPARCL1, CPXM2, NLGN2,<br>SERPING1, FRZB, MCAM,<br>SLIT2, SOD3, SLIT3, PRELP, |
| GOTERM_CC_<br>DIRECT | GO:0005615~extracel<br>lular space                            | 42 | <0.001 | C2ORF40, SH3BGRL, FBLN1,                                                                                                                                                                                                             |

|            |                                                  |    |        |                                                                                                                                                                      |
|------------|--------------------------------------------------|----|--------|----------------------------------------------------------------------------------------------------------------------------------------------------------------------|
|            |                                                  |    |        | COL14A1, CCL14, SFRP1, PTGDS, SERPINF1, FBLN5, WFDC1, SSC5D, JAM3, CMTM5                                                                                             |
| GOTERM_MF_ | GO:0004016~adenylate cyclase activity            | 5  | <0.001 | ADCY5, GUCY1A3, NPR1, GUCY1B3, NPR2                                                                                                                                  |
| DIRECT     |                                                  |    |        | RAMP3, ANXA6, TRPC1, CYSLTR1, NMUR1, PLN, PKD2, ITPR1                                                                                                                |
| GOTERM_BP_ | GO:0006816~calcium ion transport                 | 8  | <0.001 | TLN1, LIMS2, PDLIM7, FHL1, FERMT2, PIP5K1C, CSRP1, MCAM, FLNA, ANXA6, TNS2, TNS1, PGM5, LAYN, ILK, RHOB, TGFB1I1, PARVA                                              |
| DIRECT     |                                                  |    |        | GUCY1A3, NPR1, GUCY1B3, NPR2                                                                                                                                         |
| GOTERM_CC_ | GO:0005925~focal adhesion                        | 18 | <0.001 | OGN, TGFB1I1, SLIT2, SLIT3                                                                                                                                           |
| DIRECT     |                                                  |    |        | SMOC2, FBLN1, SERPINF1, EFEMP2, CCDC80, COL8A2, NTN1, MMRN2                                                                                                          |
| GOTERM_MF_ | GO:0004383~guanylate cyclase activity            | 4  | <0.001 | GUCY1A3, NPR1, GUCY1B3, NPR2                                                                                                                                         |
| DIRECT     |                                                  |    |        |                                                                                                                                                                      |
| GOTERM_MF_ | GO:0048495~Roundabout binding                    | 4  | <0.001 | OGN, TGFB1I1, SLIT2, SLIT3                                                                                                                                           |
| DIRECT     |                                                  |    |        | SMOC2, FBLN1, SERPINF1, EFEMP2, CCDC80, COL8A2, NTN1, MMRN2                                                                                                          |
| GOTERM_CC_ | GO:0005604~basement membrane                     | 8  | <0.001 | NTN1, MMRN2                                                                                                                                                          |
| DIRECT     |                                                  |    |        |                                                                                                                                                                      |
| GOTERM_CC_ | GO:0008074~guanylate cyclase complex, soluble    | 4  | <0.001 | GUCY1A3, NPR1, GUCY1B3, NPR2                                                                                                                                         |
| DIRECT     |                                                  |    |        | LTBP1, NCS1, C1R, C1S, MYL9, ANXA6, SMOC2, FAT3, PKD2, EHD2, SVEP1, SPARCL1, EFEMP2, MGP, MAN1C1, SLIT2, ITPR1, SLIT3, FBLN1, EML1, PLSCR4, FBLN5, CASQ2, SGCA, AOC3 |
| GOTERM_MF_ | GO:0005509~calcium ion binding                   | 25 | 0.001  | CASQ2, SGCA, AOC3                                                                                                                                                    |
| DIRECT     |                                                  |    |        |                                                                                                                                                                      |
| GOTERM_BP_ | GO:0008015~blood circulation                     | 6  | 0.001  | MEOX2, PLN, ELN, GUCY1A3, SERPING1, GUCY1B3                                                                                                                          |
| DIRECT     |                                                  |    |        |                                                                                                                                                                      |
| GOTERM_BP_ | GO:0034329~cell junction assembly                | 4  | 0.001  | LIMS2, FERMT2, ILK, FLNA                                                                                                                                             |
| DIRECT     |                                                  |    |        | RECK, ADARB1, PODN, CYP1B1, MAGI2, SFRP1, RHOB, SLIT2                                                                                                                |
| GOTERM_BP_ | GO:0030336~negative regulation of cell migration | 8  | 0.001  | RHOB, SLIT2                                                                                                                                                          |
| DIRECT     |                                                  |    |        |                                                                                                                                                                      |
| GOTERM_BP_ | GO:0008016~regulation of heart contraction       | 5  | 0.002  | FXYP1, GNAO1, CHRM2, PLN, DMPK                                                                                                                                       |
| DIRECT     |                                                  |    |        |                                                                                                                                                                      |
| GOTERM_BP_ | GO:0051414~response to cortisol                  | 3  | 0.002  | IGFBP7, SLIT2, SLIT3                                                                                                                                                 |
| DIRECT     |                                                  |    |        |                                                                                                                                                                      |
| GOTERM_CC_ | GO:0005886~plasma membrane                       | 92 | 0.002  | RHOJ, SLC9A9, GYPC, CADM3, TLN1, JPH2, ATP1B2,                                                                                                                       |
| DIRECT     |                                                  |    |        |                                                                                                                                                                      |

---

|            |                      |   |       |                                                                                                                                                                                                                                                                                                                                                                                                                                                                                                                                                                                                                       |
|------------|----------------------|---|-------|-----------------------------------------------------------------------------------------------------------------------------------------------------------------------------------------------------------------------------------------------------------------------------------------------------------------------------------------------------------------------------------------------------------------------------------------------------------------------------------------------------------------------------------------------------------------------------------------------------------------------|
|            |                      |   |       | TACR2, ADCY5, GRIK5, NCS1, TNFSF12, FRRS1L, DMPK, EDNRA, ST6GALNAC6, S1PR1, SLC2A4, NMUR1, ILK, GUCY1A3, RHOB, ATP8B2, TMEM100, FAM129A, NEGR1, BOC, GHR, RAMP3, KCNMA1, RECK, AR, MAGI2, ACKR1, MRGPRF, COLEC12, FLNA, SLIT2, TNS2, CHRM2, ROR2, GUCY1B3, CLIP3, JAM2, JAM3, AOC3, PARVA, FXYD1, ABCA8, LIMS2, CYSLTR1, ARHGEF25, FHL1, GNG11, KCNA5, PLPP1, FXYD6, KCNMB1, RGMA, FAT3, PLIN4, PKD2, KLHL41, PRIMA1, EHD2, TRPC1, SELP, VSTM4, GNAO1, KLF9, EPM2A, MAP1B, NPR1, NPR2, ATP1A2, MAPK10, MCAM, PTGFR, ITPR1, ITGA9, ABCC9, TMEM47, PDE2A, SFRP1, PLSCR4, P2RY14, BNC2, ITGA7, SCN4B, APBB1, HTR2A, FEZ1 |
| GOTERM_BP_ | GO:0006182~cGMP      |   |       | GUCY1A3, NPR1, GUCY1B3,                                                                                                                                                                                                                                                                                                                                                                                                                                                                                                                                                                                               |
| DIRECT     | biosynthetic process | 4 | 0.002 | NPR2                                                                                                                                                                                                                                                                                                                                                                                                                                                                                                                                                                                                                  |
| GOTERM_CC_ | GO:0001725~stress    |   |       | PGM5, PDLIM7, FERMT2, ILK,                                                                                                                                                                                                                                                                                                                                                                                                                                                                                                                                                                                            |
| DIRECT     | fiber                | 6 | 0.002 | SYNPO, MYL9                                                                                                                                                                                                                                                                                                                                                                                                                                                                                                                                                                                                           |
| GOTERM_MF_ | GO:0044325~ion       |   |       | FXYD1, TRPC1, ABCC9, FHL1,                                                                                                                                                                                                                                                                                                                                                                                                                                                                                                                                                                                            |
| DIRECT     | channel binding      | 8 | 0.002 | PKD2, SCN4B, FLNA, KCNE4                                                                                                                                                                                                                                                                                                                                                                                                                                                                                                                                                                                              |
| GOTERM_MF_ | GO:0005518~collage   |   |       | ITGA9, PODN, COL14A1,                                                                                                                                                                                                                                                                                                                                                                                                                                                                                                                                                                                                 |
| DIRECT     | n binding            | 6 | 0.003 | SPARCL1, DCN, ABI3BP                                                                                                                                                                                                                                                                                                                                                                                                                                                                                                                                                                                                  |
| GOTERM_BP_ | GO:0006939~smooth    |   |       | EDNRA, SMTN, NMUR1,                                                                                                                                                                                                                                                                                                                                                                                                                                                                                                                                                                                                   |
| DIRECT     | muscle contraction   | 4 | 0.003 | HTR2A                                                                                                                                                                                                                                                                                                                                                                                                                                                                                                                                                                                                                 |
|            | GO:0010811~positive  |   |       |                                                                                                                                                                                                                                                                                                                                                                                                                                                                                                                                                                                                                       |
|            | regulation of        |   |       |                                                                                                                                                                                                                                                                                                                                                                                                                                                                                                                                                                                                                       |
| GOTERM_BP_ | cell-substrate       |   |       | SMOC2, FOXF1, CCDC80,                                                                                                                                                                                                                                                                                                                                                                                                                                                                                                                                                                                                 |
| DIRECT     | adhesion             | 5 | 0.003 | ABI3BP, EMILIN1                                                                                                                                                                                                                                                                                                                                                                                                                                                                                                                                                                                                       |
|            | GO:0010976~positive  |   |       |                                                                                                                                                                                                                                                                                                                                                                                                                                                                                                                                                                                                                       |
|            | regulation of neuron |   |       | RGMA, MAGI2, MOB2,                                                                                                                                                                                                                                                                                                                                                                                                                                                                                                                                                                                                    |
| GOTERM_BP_ | projection           |   |       | SERPINF1, APBB1, NEGR1,                                                                                                                                                                                                                                                                                                                                                                                                                                                                                                                                                                                               |
| DIRECT     | development          | 7 | 0.003 | FEZ1                                                                                                                                                                                                                                                                                                                                                                                                                                                                                                                                                                                                                  |

---

|            |                                                           |    |       |                                                                                                                                                    |
|------------|-----------------------------------------------------------|----|-------|----------------------------------------------------------------------------------------------------------------------------------------------------|
| GOTERM_BP_ | GO:0001525~angiogenesis                                   | 11 | 0.004 | CYP1B1, S1PR1, MEOX2, RHOB, TMEM100, TNFSF12, MCAM, COL8A2, MEIS1, JAM3, MMRN2                                                                     |
| DIRECT     |                                                           |    |       |                                                                                                                                                    |
| GOTERM_CC_ | GO:0030017~sarcomere                                      | 5  | 0.004 | ABCC9, ARHGEF25, ILK, LMOD1, TMOD1                                                                                                                 |
| DIRECT     |                                                           |    |       | MAGI2, MOB2, SYNC, MRVI1, NCS1, TNFSF12, KCNA5, SELENOM, FLNA, ANXA6, EML1, PDE2A, SERPINF1, SLC2A4, PTGDS, PLN, CMYA5, TMEM100, MAP6, APBB1, EHD2 |
| GOTERM_CC_ | GO:0048471~perinuclear region of cytoplasm                | 21 | 0.004 | EDNRA, ACTA2, GUCY1A3, NPR1, NPR2, ATP1A2                                                                                                          |
| DIRECT     |                                                           |    |       |                                                                                                                                                    |
| GOTERM_BP_ | GO:0008217~regulation of blood pressure                   | 6  | 0.004 | TLN1, ILK, CSRP1, FLNA, MYL9                                                                                                                       |
| DIRECT     |                                                           |    |       |                                                                                                                                                    |
| GOTERM_BP_ | GO:0070527~platelet aggregation                           | 5  | 0.004 | C1QTNF7, COL14A1, COL19A1, C1QTNF2, COLEC12, COL8A2, EMILIN1                                                                                       |
| DIRECT     |                                                           |    |       |                                                                                                                                                    |
| GOTERM_CC_ | GO:0005581~collagen trimer                                | 7  | 0.004 | KCNMA1, PTGIS, KCNA5, ATP1A2, EHD2, HTR2A                                                                                                          |
| DIRECT     |                                                           |    |       |                                                                                                                                                    |
| GOTERM_CC_ | GO:0005901~caveola                                        | 6  | 0.005 | PDE2A, PDE1A, PDE5A                                                                                                                                |
| DIRECT     |                                                           |    |       |                                                                                                                                                    |
| GOTERM_BP_ | GO:0046069~cGMP catabolic process                         | 3  | 0.005 |                                                                                                                                                    |
| DIRECT     |                                                           |    |       |                                                                                                                                                    |
| GOTERM_MF_ | GO:0050840~extracellular matrix binding                   | 4  | 0.008 | SPARCL1, ELN, DCN, SSC5D                                                                                                                           |
| DIRECT     |                                                           |    |       |                                                                                                                                                    |
| GOTERM_MF_ | GO:0001968~fibronectin binding                            | 4  | 0.008 | FBLN1, CCDC80, SSC5D, MYOC                                                                                                                         |
| DIRECT     |                                                           |    |       |                                                                                                                                                    |
| GOTERM_CC_ | GO:1903561~extracellular vesicle                          | 5  | 0.010 | OGN, OLFML3, EFEMP2, ATP1A2, PRELP                                                                                                                 |
| DIRECT     |                                                           |    |       |                                                                                                                                                    |
| GOTERM_BP_ | GO:0030178~negative regulation of Wnt signaling pathway   | 5  | 0.010 | BARX1, SFRP1, DACT3, NFATC4, FRZB                                                                                                                  |
| DIRECT     |                                                           |    |       |                                                                                                                                                    |
| GOTERM_BP_ | GO:0006813~potassium ion transport                        | 6  | 0.011 | KCNMA1, ABCC9, ATP1B2, KCNA5, ATP1A2, KCNMB1                                                                                                       |
| DIRECT     |                                                           |    |       |                                                                                                                                                    |
| GOTERM_BP_ | GO:0043267~negative regulation of potassium ion transport | 3  | 0.011 | KCNA5, CASQ2, HTR2A                                                                                                                                |
| DIRECT     |                                                           |    |       | MAGI2, MPDZ, CRYAB, MAP1B, GRIK5, NCS1, CPEB1, ITPR1, SYNPO                                                                                        |
| GOTERM_CC_ | GO:0014069~postsynaptic density                           | 9  | 0.012 |                                                                                                                                                    |
| DIRECT     |                                                           |    |       |                                                                                                                                                    |
| GOTERM_CC_ | GO:0005890~sodium:potassium-exchanging                    | 3  | 0.014 | FXYD1, ATP1B2, ATP1A2                                                                                                                              |
| DIRECT     |                                                           |    |       |                                                                                                                                                    |

---

|            |                       |   |       |                                                |
|------------|-----------------------|---|-------|------------------------------------------------|
|            | ATPase complex        |   |       |                                                |
|            | GO:0016849~phosph     |   |       |                                                |
| GOTERM_MF_ | orus-oxygen lyase     |   |       |                                                |
| DIRECT     | activity              | 3 | 0.015 | ADCY5, NPR1, NPR2                              |
|            | GO:0030007~cellular   |   |       |                                                |
| GOTERM_BP_ | potassium ion         |   |       |                                                |
| DIRECT     | homeostasis           | 3 | 0.016 | KCNMA1, ATP1B2, ATP1A2                         |
| GOTERM_BP_ | GO:0055119~relaxati   |   |       |                                                |
| DIRECT     | on of cardiac muscle  | 3 | 0.016 | PLN, PDE5A, ATP1A2                             |
|            | GO:0009190~cyclic     |   |       |                                                |
| GOTERM_BP_ | nucleotide            |   |       |                                                |
| DIRECT     | biosynthetic process  | 3 | 0.016 | ADCY5, NPR1, NPR2                              |
|            | GO:0048846~axon       |   |       |                                                |
| GOTERM_BP_ | extension involved in |   |       |                                                |
| DIRECT     | axon guidance         | 3 | 0.016 | OGN, SLIT2, SLIT3                              |
|            | GO:0035385~Rounda     |   |       |                                                |
| GOTERM_BP_ | bout signaling        |   |       |                                                |
| DIRECT     | pathway               | 3 | 0.016 | OGN, SLIT2, SLIT3                              |
| GOTERM_BP_ | GO:0007585~respirat   |   |       |                                                |
| DIRECT     | ory gaseous exchange  | 4 | 0.017 | EDNRA, CYSLTR1, ELN, PBX3                      |
|            | GO:0086012~membra     |   |       |                                                |
|            | ne depolarization     |   |       |                                                |
| GOTERM_BP_ | during cardiac muscle |   |       |                                                |
| DIRECT     | cell action potential | 3 | 0.018 | SCN2B, SCN4B, ATP1A2                           |
|            | GO:0002087~regulati   |   |       |                                                |
|            | on of respiratory     |   |       |                                                |
|            | gaseous exchange by   |   |       |                                                |
| GOTERM_BP_ | neurological system   |   |       |                                                |
| DIRECT     | process               | 3 | 0.018 | NLGN2, ATP1A2, PBX3                            |
| GOTERM_BP_ | GO:0030239~myofibr    |   |       |                                                |
| DIRECT     | il assembly           | 3 | 0.018 | LMOD1, KLHL41, TMOD1                           |
|            | GO:0033017~sarcopla   |   |       |                                                |
| GOTERM_CC_ | smic reticulum        |   |       |                                                |
| DIRECT     | membrane              | 4 | 0.019 | PLN, KLHL41, CASQ2, DMPK                       |
| GOTERM_CC_ | GO:0005614~interstiti |   |       |                                                |
| DIRECT     | al matrix             | 3 | 0.019 | SMOC2, CCDC80, ABI3BP                          |
| GOTERM_MF_ | GO:0005109~frizzled   |   |       |                                                |
| DIRECT     | binding               | 4 | 0.020 | SFRP1, RSPO3, ROR2, MYOC                       |
|            | GO:0004867~serine-t   |   |       |                                                |
| GOTERM_MF_ | ype endopeptidase     |   |       |                                                |
| DIRECT     | inhibitor activity    | 6 | 0.021 | RECK, A2M, SERPINF1, ITIH5,<br>WFDC1, SERPING1 |
|            | GO:0047555~3',5'-cyc  |   |       |                                                |
| GOTERM_MF_ | lic-GMP               |   |       |                                                |
| DIRECT     | phosphodiesterase     | 3 | 0.021 | PDE2A, PDE1A, PDE5A                            |

---

---

|                  |                                                                        |    |       |                                                                                                                        |
|------------------|------------------------------------------------------------------------|----|-------|------------------------------------------------------------------------------------------------------------------------|
|                  | activity                                                               |    |       |                                                                                                                        |
|                  | GO:0006937~regulation of muscle contraction                            | 3  | 0.021 | ANXA6, HSPB6, MYL9                                                                                                     |
| GOTERM_BP_DIRECT | GO:0022011~myelination in peripheral nervous system                    | 3  | 0.021 | ILK, LGI4, MYOC                                                                                                        |
|                  | GO:0007229~integrin-mediated signaling pathway                         | 6  | 0.022 | ITGA9, FBLN1, FERMT2, ITGA7, ILK, ADAM33, CADM3, TLN1, TMEM47, PDLIM7, ILK, PKD2, FLNA, SGCA                           |
| GOTERM_CC_DIRECT | GO:0005911~cell-cell junction                                          | 8  | 0.026 | SGCA                                                                                                                   |
|                  | GO:0007224~smooth ended signaling pathway                              | 5  | 0.026 | EVC, FOXF1, CC2D2A, ROR2, BOC, RBPMS2, RBPMS, PYGM, PABPC5, ADCY5, RBMS3, GUCY1A3, NPR1, GUCY1B3, CPEB1, ATP1A2, RCAN2 |
| GOTERM_MF_DIRECT | GO:0000166~nucleotide binding                                          | 12 | 0.026 | CPEB1, ATP1A2, RCAN2                                                                                                   |
|                  | GO:2000649~regulation of sodium ion transmembrane transporter activity | 3  | 0.027 | FXYP1, SCN2B, SCN4B                                                                                                    |
| GOTERM_BP_DIRECT | GO:0000226~microtubule cytoskeleton organization                       | 5  | 0.028 | EML1, MAP1A, MAP1B, DCLK2, MAP6                                                                                        |
|                  | GO:0051209~release of sequestered calcium ion into cytosol             | 4  | 0.029 | JPH2, PKD2, ITPR1, HTR2A                                                                                               |
| GOTERM_MF_DIRECT | GO:0030553~cGMP binding                                                | 3  | 0.030 | PDE2A, PDE1A, PDE5A                                                                                                    |
|                  | GO:0008307~structural constituent of muscle                            | 4  | 0.030 | SMTN, PDLIM3, TPM2, MYL9, PKNOX2, POU6F1, SMTN, PDLIM7, ACTA2, PDLIM3, FLNA, SYNPO, PARVA                              |
| GOTERM_CC_DIRECT | GO:0015629~actin cytoskeleton                                          | 9  | 0.030 | FLNA, SYNPO, PARVA                                                                                                     |
| GOTERM_BP_DIRECT | GO:0007566~embryo implantation                                         | 4  | 0.030 | RECK, FBLN1, PTGIS, IGFBP7                                                                                             |
|                  | GO:0001869~negative regulation of complement                           | 2  | 0.032 | A2M, SERPING1                                                                                                          |

---

---

|            |                                                                                                             |    |       |                                                                    |
|------------|-------------------------------------------------------------------------------------------------------------|----|-------|--------------------------------------------------------------------|
|            | activation, lectin pathway                                                                                  |    |       |                                                                    |
|            | GO:0010596~negative regulation of endothelial cell migration                                                | 3  | 0.034 | SERPINF1, DCN, SLIT2                                               |
| GOTERM_BP_ | GO:0048557~embryonic digestive tract morphogenesis                                                          | 3  | 0.034 | RBPMS2, TCF21, FOXF1                                               |
| DIRECT     | GO:0008144~drug binding                                                                                     | 5  | 0.035 | PDE2A, SFRP1, CHRM2, ATP1A2, HTR2A                                 |
| GOTERM_BP_ | GO:0032870~cellular response to hormone stimulus                                                            | 4  | 0.036 | IGFBP7, SLIT2, GHR, SLIT3                                          |
| DIRECT     | GO:0060048~cardiac muscle contraction                                                                       | 4  | 0.036 | SCN2B, SCN4B, ATP1A2, CASQ2                                        |
| GOTERM_BP_ | GO:0010881~regulation of cardiac muscle contraction by regulation of the release of sequestered calcium ion | 3  | 0.037 | PLN, ATP1A2, CASQ2                                                 |
| DIRECT     | GO:0003779~actin binding                                                                                    | 10 | 0.037 | KCNMA1, SMTN, TNS1, TAGLN, LMOD1, TPM2, DAAM2, TMOD1, SYNPO, PARVA |
| GOTERM_MF_ | GO:0014704~intercalated disc                                                                                | 4  | 0.039 | PGM5, SCN4B, KCNA5, ATP1A2                                         |
| DIRECT     | GO:0031532~actin cytoskeleton reorganization                                                                | 4  | 0.040 | S1PR1, FGF7, FLNA, PARVA                                           |
| GOTERM_BP_ | GO:0045600~positive regulation of fat cell differentiation                                                  | 4  | 0.040 | SFRP1, LMO3, FRZB, HTR2A                                           |
| DIRECT     | GO:0005248~voltage-gated sodium channel activity                                                            | 3  | 0.041 | SCN2B, PKD2, SCN4B                                                 |
| GOTERM_MF_ | GO:0043113~receptor clustering                                                                              | 3  | 0.041 | MAGI2, GRIK5, FLNA                                                 |
| DIRECT     | GO:0071805~potassium ion transmembrane transport                                                            | 6  | 0.047 | SLC9A9, KCNMA1, PKD2, KCNA5, KCNMB1, KCNE4                         |
| GOTERM_BP_ | GO:0016941~natriuretic peptide receptor                                                                     | 2  | 0.048 | NPR1, NPR2                                                         |
| DIRECT     |                                                                                                             |    |       |                                                                    |

---

---

|            |                                                                                                |   |       |                                                                                 |
|------------|------------------------------------------------------------------------------------------------|---|-------|---------------------------------------------------------------------------------|
|            | activity                                                                                       |   |       |                                                                                 |
|            | GO:0061364~apoptotic process involved in                                                       |   |       |                                                                                 |
| GOTERM_BP_ | luteolysis                                                                                     | 2 | 0.048 | SLIT2, SLIT3                                                                    |
| DIRECT     |                                                                                                |   |       |                                                                                 |
|            | GO:0021834~chemorepulsion involved in embryonic olfactory bulb interneuron precursor migration |   |       |                                                                                 |
| GOTERM_BP_ |                                                                                                | 2 | 0.048 | SLIT2, SLIT3                                                                    |
| DIRECT     |                                                                                                |   |       |                                                                                 |
|            | GO:0048871~multicellular organismal homeostasis                                                |   |       |                                                                                 |
| GOTERM_BP_ |                                                                                                | 2 | 0.048 | TNS2, NDN                                                                       |
| DIRECT     |                                                                                                |   |       |                                                                                 |
|            | GO:0034394~protein localization to cell surface                                                |   |       |                                                                                 |
| GOTERM_BP_ |                                                                                                | 3 | 0.049 | FGF7, FBLN5, FLNA                                                               |
| DIRECT     |                                                                                                |   |       |                                                                                 |
|            | GO:0060078~regulation of postsynaptic membrane potential                                       |   |       |                                                                                 |
| GOTERM_BP_ |                                                                                                | 3 | 0.049 | SCN2B, PKD2, SCN4B                                                              |
| DIRECT     |                                                                                                |   |       |                                                                                 |
|            | GO:0007519~skeletal muscle tissue development                                                  |   |       |                                                                                 |
| GOTERM_BP_ |                                                                                                | 4 | 0.050 | COL19A1, MEOX2, ELN, DCN                                                        |
| DIRECT     |                                                                                                |   |       |                                                                                 |
|            | GO:0042542~response to hydrogen peroxide                                                       |   |       |                                                                                 |
| GOTERM_BP_ |                                                                                                | 4 | 0.050 | TXNIP, GNAO1, CRYAB, KCNA5                                                      |
| DIRECT     |                                                                                                |   |       |                                                                                 |
|            | GO:0030863~cortical cytoskeleton                                                               |   |       |                                                                                 |
| GOTERM_CC_ |                                                                                                | 3 | 0.051 | GYPE, FLNA, TMOD1                                                               |
| DIRECT     |                                                                                                |   |       |                                                                                 |
|            | GO:0008344~adult locomotory behavior                                                           |   |       |                                                                                 |
| GOTERM_BP_ |                                                                                                | 4 | 0.052 | LGI4, ATP1A2, PBX3, TMOD1, GNAO1, SERPINF1, CRYAB, SERPING1, DCN, KCNMB1, HTR2A |
| DIRECT     |                                                                                                |   |       |                                                                                 |
|            | GO:0007568~aging                                                                               |   |       |                                                                                 |
| GOTERM_BP_ |                                                                                                | 7 | 0.052 |                                                                                 |
| DIRECT     |                                                                                                |   |       |                                                                                 |
|            | GO:0004114~3',5'-cyclic-nucleotide phosphodiesterase activity                                  |   |       |                                                                                 |
| GOTERM_MF_ |                                                                                                | 3 | 0.053 | PDE2A, PDE1A, PDE5A                                                             |
| DIRECT     |                                                                                                |   |       |                                                                                 |
|            | GO:0042383~sarcomeremodelling                                                                  |   |       |                                                                                 |
| GOTERM_CC_ |                                                                                                | 5 | 0.054 | FXYD1, ABCC9, PGM5, SYNC, SGCA                                                  |
| DIRECT     |                                                                                                |   |       |                                                                                 |
|            | GO:0034220~ion transmembrane transport                                                         |   |       |                                                                                 |
| GOTERM_BP_ |                                                                                                | 8 | 0.055 | ANXA6, FXYD1, ATP1B2, GRIK5, ATP8B2, ATP1A2, FXYD6, CASQ2                       |
| DIRECT     |                                                                                                |   |       |                                                                                 |
|            | GO:0031430~M band                                                                              |   |       |                                                                                 |
| GOTERM_BP_ |                                                                                                | 3 | 0.056 | CRYAB, CMYA5, KLHL41                                                            |
| DIRECT     |                                                                                                |   |       |                                                                                 |
|            | GO:0007160~cell-matrix adhesion                                                                |   |       |                                                                                 |
| GOTERM_BP_ |                                                                                                | 5 | 0.058 | FBLN5, FERMT2, ITGA7, ILK, JAM3                                                 |
| DIRECT     |                                                                                                |   |       |                                                                                 |

---



|            |                                                                                   |    |       |                                                                                                           |
|------------|-----------------------------------------------------------------------------------|----|-------|-----------------------------------------------------------------------------------------------------------|
| GOTERM_BP_ | GO:0007368~determi<br>nation of left/right<br>symmetry                            | 4  | 0.060 | FOXF1, CC2D2A, PKD2,<br>DAAM2                                                                             |
| GOTERM_BP_ | GO:0032355~respons<br>e to estradiol                                              | 5  | 0.060 | TXNIP, CRYAB, WFDC1,<br>PTGFR, GHR                                                                        |
| GOTERM_BP_ | GO:2000134~negativ<br>e regulation of G1/S<br>transition of mitotic<br>cell cycle | 3  | 0.061 | FHL1, PKD2, KANK2<br>NXPH3, CADM3, AR, A2M,<br>RSPO1, RSPO3, C1QTNF2,<br>PKD2, ANGPTL1, KCNA5,<br>TNFSF12 |
| GOTERM_MF_ | GO:0005102~receptor<br>binding                                                    | 11 | 0.062 |                                                                                                           |
| GOTERM_MF_ | GO:0031852~mu-type<br>opioid receptor<br>binding                                  | 2  | 0.063 | GNAO1, FLNA                                                                                               |
| GOTERM_BP_ | GO:1903278~positive<br>regulation of sodium<br>ion export from cell               | 2  | 0.063 | FXYD1, ATP1B2<br>MPDZ, CHRM2, GRIK5, NCS1,<br>NLGN2, CPEB1, APBB1,<br>SYNPO                               |
| GOTERM_CC_ | GO:0045211~postsyn<br>aptic membrane                                              | 8  | 0.064 |                                                                                                           |
| GOTERM_BP_ | GO:0007202~activati<br>on of phospholipase C<br>activity                          | 3  | 0.066 | EDNRA, NMUR1, HTR2A                                                                                       |
| GOTERM_MF_ | GO:0048306~calcium<br>-dependent protein<br>binding                               | 4  | 0.067 | ANXA6, SELP, A2M, CASQ2                                                                                   |
| GOTERM_MF_ | GO:0017046~peptide<br>hormone binding                                             | 3  | 0.070 | NPR1, NPR2, GHR                                                                                           |
| GOTERM_BP_ | GO:0071456~cellular<br>response to hypoxia                                        | 5  | 0.071 | PTGIS, SFRP1, SLC2A4,<br>CPEB1, KCNMB1                                                                    |
| GOTERM_BP_ | GO:0010107~potassiu<br>m ion import                                               | 3  | 0.075 | ABCC9, ATP1B2, ATP1A2                                                                                     |
| GOTERM_BP_ | GO:0018146~keratan<br>sulfate biosynthetic<br>process                             | 3  | 0.075 | OGN, ST3GAL3, PRELP                                                                                       |
| GOTERM_BP_ | GO:0001933~negativ<br>e regulation of protein<br>phosphorylation                  | 4  | 0.076 | FBLN1, WWTR1, FAM129A,<br>SLIT2<br>EDNRA, POU6F1, FOXF1,<br>CC2D2A, PKD2, PDLIM3,<br>NFATC4               |
| GOTERM_BP_ | GO:0007507~heart<br>development                                                   | 7  | 0.077 |                                                                                                           |
| GOTERM_MF_ | GO:0086006~voltage-                                                               | 2  | 0.078 | SCN2B, SCN4B                                                                                              |

|            |                                                                                |   |       |                                                      |
|------------|--------------------------------------------------------------------------------|---|-------|------------------------------------------------------|
| DIRECT     | gated sodium channel activity involved in cardiac muscle cell action potential |   |       |                                                      |
| GOTERM_BP_ | GO:0090131~mesenc                                                              |   |       |                                                      |
| DIRECT     | hyme migration                                                                 | 2 | 0.078 | ACTA2, FOXF1                                         |
| GOTERM_BP_ | GO:0071504~cellular                                                            |   |       |                                                      |
| DIRECT     | response to heparin                                                            | 2 | 0.078 | SFRP1, SLIT2                                         |
| GOTERM_BP_ | GO:2000809~positive                                                            |   |       |                                                      |
| DIRECT     | regulation of synaptic vesicle clustering                                      | 2 | 0.078 | MAGI2, NLGN2                                         |
| GOTERM_BP_ | GO:0032387~negativ                                                             |   |       |                                                      |
| DIRECT     | e regulation of intracellular transport                                        | 2 | 0.078 | CRYAB, MAP1B                                         |
| GOTERM_BP_ | GO:2001046~positive                                                            |   |       |                                                      |
| DIRECT     | regulation of integrin-mediated signaling pathway                              | 2 | 0.078 | LIMS2, FLNA                                          |
| GOTERM_BP_ | GO:0007195~adenyla                                                             |   |       |                                                      |
| DIRECT     | te cyclase-inhibiting dopamine receptor signaling pathway                      | 2 | 0.078 | ADCY5, FLNA                                          |
| GOTERM_BP_ | GO:0070100~negativ                                                             |   |       |                                                      |
| DIRECT     | e regulation of chemokine-mediated signaling pathway                           | 2 | 0.078 | SLIT2, SLIT3                                         |
| GOTERM_CC_ | GO:0030016~myofibr                                                             |   |       |                                                      |
| DIRECT     | il                                                                             | 3 | 0.079 | ARHGEF25, LMOD1, TMOD1                               |
| GOTERM_BP_ | GO:0048662~negativ                                                             |   |       |                                                      |
| DIRECT     | e regulation of smooth muscle cell proliferation                               | 3 | 0.080 | OGN, ILK, NPR1                                       |
| GOTERM_CC_ | GO:0031088~platelet                                                            |   |       |                                                      |
| DIRECT     | dense granule membrane                                                         | 2 | 0.081 | SELP, ITPR1                                          |
| GOTERM_CC_ | GO:0045202~synapse                                                             |   |       |                                                      |
| DIRECT     |                                                                                | 7 | 0.083 | MAGI2, CHRM2, NLGN2, CPEB1, PRIMA1, APBB1, FRRS1L    |
| GOTERM_BP_ | GO:0016055~Wnt                                                                 |   |       |                                                      |
| DIRECT     | signaling pathway                                                              | 7 | 0.084 | RSPO1, DACT3, RSPO3, FERMT2, TGFB111, FRZB, CALCOCO1 |
| GOTERM_BP_ | GO:0045773~positive                                                            |   |       |                                                      |
| DIRECT     | regulation of axon extension                                                   | 3 | 0.085 | ILK, MAP1B, NTN1                                     |

|            |                                                                                                                          |    |       |                                                                                                                                                     |
|------------|--------------------------------------------------------------------------------------------------------------------------|----|-------|-----------------------------------------------------------------------------------------------------------------------------------------------------|
| GOTERM_CC_ | GO:0042734~presynaptic membrane                                                                                          | 4  | 0.085 | PDE2A, GRIK5, NLGN2, APBB1, RBPMS2, CADM3, CRYAB, WWTR1, SLIT2, FLNA, ANXA6, RBPMS, PDE2A, HSPB6, FBLN5, PRDM6, PKD2, ZBTB4, JAM3, CASQ2, GHR, AOC3 |
| GOTERM_MF_ | GO:0042803~protein homodimerization activity                                                                             | 18 | 0.085 | CRYAB, MAP1B, ATP1A2, APBB1, SYNPO                                                                                                                  |
| GOTERM_CC_ | GO:0043197~dendritic spine                                                                                               | 5  | 0.086 | SELP, TLN1, A2M, SERPING1, FLNA                                                                                                                     |
| GOTERM_BP_ | GO:0002576~platelet degranulation                                                                                        | 5  | 0.086 | SFRP1, ROR2, FRZB                                                                                                                                   |
| GOTERM_MF_ | GO:0017147~Wnt-protein binding                                                                                           | 3  | 0.089 |                                                                                                                                                     |
| GOTERM_MF_ | GO:0001077~transcriptional activator activity, RNA polymerase II core promoter proximal region sequence-specific binding | 8  | 0.089 | TCF21, AR, SSBP2, MEOX2, NDN, NFIC, MEIS1, NFIA                                                                                                     |
| GOTERM_MF_ | GO:0005178~integrin binding                                                                                              | 5  | 0.091 | TLN1, FBLN1, FBLN5, ILK, JAM3                                                                                                                       |
| GOTERM_BP_ | GO:0050790~regulation of catalytic activity                                                                              | 4  | 0.092 | RNF180, AR, RCAN2, DMPK                                                                                                                             |
| GOTERM_MF_ | GO:0070492~oligosaccharide binding                                                                                       | 2  | 0.093 | GYPC, SELP                                                                                                                                          |
| GOTERM_BP_ | GO:0051150~regulation of smooth muscle cell differentiation                                                              | 2  | 0.093 | FOXF1, ZEB1                                                                                                                                         |
| GOTERM_BP_ | GO:0003416~endochondral bone growth                                                                                      | 2  | 0.093 | EVC, BNC2                                                                                                                                           |
| GOTERM_BP_ | GO:0060426~lung vasculature development                                                                                  | 2  | 0.093 | TCF21, FOXF1                                                                                                                                        |
| GOTERM_BP_ | GO:0007044~cell-substrate junction assembly                                                                              | 2  | 0.093 | TLN1, TNS1                                                                                                                                          |
| GOTERM_BP_ | GO:2000052~positive regulation of non-canonical Wnt signaling pathway                                                    | 2  | 0.093 | SFRP1, RSPO3                                                                                                                                        |
| GOTERM_MF_ | GO:0008270~zinc ion                                                                                                      | 26 | 0.093 | LIMS2, ZCCHC24, PDLIM7,                                                                                                                             |

|            |                                              |   |       |                                                                                                                                                                         |
|------------|----------------------------------------------|---|-------|-------------------------------------------------------------------------------------------------------------------------------------------------------------------------|
| DIRECT     | binding                                      |   |       | ADAMTSL3, LMO3, FHL1, PDLIM3, ADH1B, ZEB1, ADAM33, NR2F1, AR, BHMT2, PDZRN4, CPXM2, PDZRN3, CSRP1, SOD3, MSRB3, RNF180, RNF150, BNC2, PRICKLE2, ZNF385D, ZFPM2, TGFB1I1 |
| GOTERM_CC_ | GO:0031941~filamentous actin                 | 3 | 0.094 | FERMT2, PKD2, FLNA                                                                                                                                                      |
| DIRECT     | GO:0017080~sodium channel regulator activity | 3 | 0.094 | FXYD1, SCN2B, SCN4B                                                                                                                                                     |
| GOTERM_MF_ | GO:0005884~actin filament                    | 4 | 0.095 | LMOD1, TPM2, FLNA, TMOD1, BARX1, CHRDL1, SCN2B, NDN, CHRM2, SCRG1, EPM2A, MAP1B, FEZ1                                                                                   |
| DIRECT     | GO:0007399~nervous system development        | 9 | 0.095 | MAP1B, FEZ1                                                                                                                                                             |
| GOTERM_BP_ | GO:0043198~dendritic shaft                   | 3 | 0.099 | ILK, FLNA, HTR2A                                                                                                                                                        |
| DIRECT     |                                              |   |       |                                                                                                                                                                         |
